# Supplementary material for: Clinical and therapeutical significances of the cluster and signature based on oxidative stress for osteosarcoma
Source: Aging (Albany NY). 2023 Dec 29;15(24):15360–81. doi: 10.18632/aging.205354 (PMC10781490; doi:10.18632/aging.205354)
Supplement: Supplementary File 1 [file aging-15-205354-s003.xls]

Supplementary File 1. The processed data of GSE21257.
ID_REF	GSM530667	GSM530899	GSM531283	GSM531284	GSM531285	GSM531286	GSM531287	GSM531288	GSM531289	GSM531290	GSM531291	GSM531292	GSM531293	GSM531294	GSM531295	GSM531296	GSM531297	GSM531298	GSM531299	GSM531300	GSM531301	GSM531302	GSM531303	GSM531304	GSM531305	GSM531306	GSM531307	GSM531308	GSM531309	GSM531310	GSM531311	GSM531312	GSM531313	GSM531314	GSM531319	GSM531320	GSM531321	GSM531322	GSM531323	GSM531324	GSM531325	GSM531326	GSM531327	GSM531328	GSM531329	GSM531330	GSM531331	GSM531332	GSM531333
0..gjSdbqnr.rUSTBI	10.02	10.55	9.61	9.76	10.5	9.8	10.52	9.41	8.51	10.38	11	9.63	10.33	10.11	10.05	10.41	9.17	9.63	8.86	9.72	9.64	10.17	11.5	10.82	11.66	10.79	9.87	10.7	10.07	11.79	11.91	11.18	10.36	10.21	10.13	10.13	10.51	10.32	10.87	10.49	10.59	9.3	10.25	11.99	9.63	11.86	9.05	10.78	10.17
0..UumuKCCspSt6kq0	7.24	7.18	7.17	7.23	7.19	7.17	7.21	7.18	7.18	7.18	7.19	7.23	7.17	7.17	7.19	7.18	7.2	7.22	7.18	7.19	7.2	7.21	7.22	7.21	7.22	7.17	7.21	7.22	7.19	7.18	7.23	7.24	7.2	7.22	7.24	7.23	7.22	7.26	7.2	7.25	7.23	7.18	7.22	7.19	7.2	7.22	7.27	7.23	7.22
0..VCF1vg_RRSc.w40	7.16	7.11	7.09	7.1	7.12	7.07	7.09	7.15	7.1	7.13	7.12	7.06	7.1	7.19	7.1	7.08	7.01	7.07	7.17	7.17	7.18	7.14	7.14	7.17	7.16	7.09	7.14	7.08	7.17	7.09	7.11	7.12	7.13	7.12	7.11	7.14	7.14	7.1	7.14	7.08	7.1	7.09	7.08	7.14	7.06	7.18	7.14	7.08	7.01
0._I6Iu6nqLqkouxKI	7.29	7.33	7.32	7.31	7.29	7.23	7.22	7.28	7.37	7.31	7.25	7.24	7.26	7.29	7.34	7.27	7.34	7.29	7.37	7.45	7.33	7.49	7.47	7.45	7.41	7.25	7.29	7.36	7.47	7.32	7.25	7.3	7.33	7.26	7.31	7.24	7.21	7.24	7.32	7.3	7.33	7.28	7.28	7.24	7.27	7.51	7.36	7.33	7.25
0.c4xe3uP9onqr1XFU	7.83	7.95	7.64	7.74	7.79	7.79	8.2	7.65	7.48	7.74	7.68	7.85	7.75	7.68	7.77	8.01	7.63	7.93	7.56	7.39	7.79	7.82	7.53	7.72	7.74	7.94	7.57	7.57	7.52	7.75	7.43	7.59	7.62	7.48	7.5	7.55	7.6	7.86	7.51	7.52	7.58	7.57	7.93	7.77	8.29	7.38	7.9	7.73	7.8
0.cj6oyogKilSgrdV4	8.88	8.72	8.76	9.24	9.23	9.24	9.2	8.66	8.38	8.32	8.29	8.54	9.38	8.38	8.47	8.79	8.52	8.72	8.3	8.44	8.18	8.32	8.27	8.49	8.48	8.3	8.19	8.67	8.44	8.36	8.68	9.23	8.54	8.64	8.22	8.59	8.45	8.42	8.34	8.52	8.52	8.61	8.45	8.36	8.74	8.58	8.96	8.56	8.66
0.D1yhJGVn_V_F6cqI	7.25	7.25	7.18	7.28	7.26	7.25	7.24	7.21	7.28	7.25	7.25	7.33	7.26	7.17	7.18	7.18	7.3	7.31	7.26	7.22	7.31	7.2	7.22	7.15	7.21	7.24	7.27	7.29	7.21	7.23	7.19	7.19	7.37	7.36	7.29	7.24	7.3	7.25	7.27	7.31	7.28	7.19	7.25	7.22	7.25	7.27	7.25	7.23	7.23
0.jegHCHIgt8Ijh90g	7.19	7.15	7.18	7.22	7.23	7.23	7.2	7.17	7.16	7.21	7.21	7.22	7.28	7.27	7.24	7.14	7.22	7.2	7.19	7.18	7.2	7.18	7.19	7.17	7.2	7.23	7.18	7.18	7.19	7.24	7.16	7.23	7.22	7.2	7.16	7.14	7.31	7.2	7.23	7.15	7.22	7.2	7.16	7.18	7.15	7.21	7.2	7.2	7.28
0.n3oBKElqlu9eQSSE	7.41	7.28	7.36	7.29	7.36	7.46	7.44	7.31	7.38	7.3	7.35	7.26	7.44	7.21	7.36	7.33	7.3	7.32	7.43	7.56	7.3	7.39	7.38	7.57	7.36	7.39	7.3	7.43	7.27	7.35	7.34	7.42	7.32	7.31	7.32	7.28	7.28	7.32	7.4	7.31	7.38	7.32	7.34	7.31	7.34	7.29	7.28	7.48	7.3
0.pyxP5e30AcI8QJTg	7.18	7.16	7.25	7.21	7.1	7.23	7.21	7.2	7.1	7.19	7.14	7.16	7.11	7.12	7.19	7.14	7.16	7.11	7.2	7.19	7.21	7.23	7.2	7.18	7.2	7.14	7.2	7.17	7.2	7.13	7.22	7.18	7.1	7.2	7.15	7.18	7.16	7.18	7.23	7.24	7.15	7.15	7.21	7.18	7.14	7.15	7.23	7.16	7.15
0.q6kS14REk6fqH7qE	7.2	7.21	7.2	7.26	7.23	7.16	7.25	7.19	7.2	7.2	7.21	7.22	7.21	7.14	7.2	7.25	7.19	7.22	7.26	7.19	7.19	7.2	7.2	7.18	7.2	7.25	7.15	7.18	7.19	7.2	7.22	7.27	7.27	7.23	7.17	7.2	7.18	7.13	7.2	7.25	7.2	7.26	7.28	7.15	7.25	7.14	7.3	7.17	7.24
0.QdfuGhlOS.ieEjvk	7.2	7.14	7.12	7.23	7.16	7.13	7.23	7.19	7.17	7.21	7.14	7.17	7.19	7.13	7.19	7.2	7.16	7.18	7.24	7.25	7.19	7.22	7.2	7.18	7.23	7.09	7.16	7.15	7.26	7.16	7.25	7.14	7.2	7.12	7.2	7.21	7.17	7.15	7.2	7.19	7.19	7.19	7.14	7.15	7.19	7.2	7.2	7.12	7.25
0.r4kfepqhd6I6ToE4	7.35	7.23	7.29	7.3	7.33	7.34	7.28	7.32	7.33	7.27	7.33	7.28	7.39	7.36	7.26	7.39	7.35	7.32	7.26	7.34	7.32	7.35	7.5	7.62	7.38	7.3	7.3	7.42	7.24	7.36	7.35	7.31	7.4	7.21	7.33	7.3	7.32	7.25	7.33	7.38	7.31	7.29	7.29	7.31	7.36	7.3	7.34	7.28	7.24
0.RKVM9eF1Sr9UcIeU	7.09	7.16	7.17	7.1	7.12	7.1	7.11	7.1	7.15	7.14	7.15	7.1	7.21	7.12	7.23	7.1	7.12	7.05	7.19	7.17	7.18	7.17	7.18	7.18	7.19	7.05	7.1	7.18	7.16	7.13	7.13	7.15	7.14	7.11	7.13	7.15	7.07	7.16	7.14	7.15	7.1	7.11	7.16	7.05	7.09	7.15	7.13	7.09	7.17
0.SUV.WLXlpX0Fge2w	7.4	7.42	7.43	7.29	7.38	7.35	7.38	7.29	7.34	7.3	7.37	7.43	7.28	7.26	7.34	7.29	7.36	7.34	7.53	7.68	7.37	7.37	7.42	7.36	7.51	7.38	7.3	7.42	7.28	7.36	7.3	7.46	7.49	7.45	7.37	7.42	7.36	7.29	7.35	7.39	7.32	7.36	7.29	7.36	7.27	7.29	7.28	7.33	7.28
0.Te7U3skS5cETJKT0	7.14	7.17	7.15	7.15	7.15	7.18	7.15	7.23	7.08	7.11	7.12	7.12	7.15	7.23	7.19	7.12	7.08	7.17	7.18	7.18	7.21	7.18	7.22	7.15	7.2	7.14	7.14	7.13	7.17	7.14	7.19	7.1	7.17	7.16	7.14	7.16	7.16	7.11	7.14	7.23	7.16	7.14	7.21	7.16	7.17	7.2	7.16	7.14	7.12
0.TuhAd32nTsxfY8TA	7.64	8.94	8.27	8.13	7.82	7.79	7.51	7.64	9.11	9.2	9.48	8.21	7.39	8.33	8.27	8.92	8.26	7.71	7.3	7.51	7.32	7.21	7.19	7.18	7.23	7.28	8.27	7.52	7.32	7.42	7.32	8.13	7.42	7.44	8.64	7.4	8.15	8.08	7.27	7.3	7.57	8.56	8.48	8.68	9.01	7.28	7.23	7.47	7.97
0.X15L1SV2iVU1fN8U	7.23	7.26	7.3	7.36	8.01	7.21	7.25	7.2	7.29	7.52	7.41	7.42	7.25	7.53	7.17	7.44	7.36	7.54	7.21	7.19	7.21	7.17	7.14	7.13	7.17	7.32	7.28	7.25	7.2	7.25	7.19	7.21	7.18	7.23	7.34	7.19	7.3	7.16	7.2	7.18	7.19	7.36	7.33	7.3	7.3	7.26	7.25	7.2	7.23
00.1PnCpTpDtQqlxL4	7.24	7.18	7.21	7.15	7.17	7.21	7.26	7.3	7.2	7.2	7.16	7.1	7.27	7.28	7.3	7.22	7.23	7.19	7.17	7.18	7.25	7.17	7.18	7.16	7.11	7.21	7.13	7.23	7.17	7.26	7.23	7.22	7.3	7.2	7.15	7.14	7.22	7.25	7.22	7.21	7.28	7.21	7.19	7.2	7.16	7.26	7.16	7.24	7.27
00.5NXDiBd.oq5e5qU	7.08	7.21	7.16	7.11	7.13	7.17	7.18	7.14	7.14	7.15	7.1	7.1	7.21	7.15	7.17	7.14	7.12	7.14	7.14	7.17	7.2	7.16	7.16	7.17	7.18	7.1	7.13	7.15	7.18	7.15	7.11	7.11	7.16	7.21	7.16	7.15	7.16	7.25	7.14	7.1	7.12	7.14	7.18	7.15	7.15	7.18	7.11	7.13	7.18
0013lO9sqSfeCoIEKU	7.19	7.15	7.16	7.26	7.16	7.12	7.14	7.12	7.19	7.11	7.16	7.19	7.17	7.22	7.14	7.19	7.18	7.13	7.22	7.2	7.22	7.18	7.2	7.18	7.21	7.15	7.13	7.19	7.21	7.18	7.17	7.22	7.19	7.15	7.18	7.21	7.17	7.14	7.23	7.14	7.13	7.22	7.15	7.1	7.2	7.18	7.25	7.15	7.27
006KJF4H96EIXelheo	7.64	8.45	7.49	8.38	8.55	8.15	8.14	9.09	8.44	7.19	7.84	9.39	7.34	9.01	7.79	7.85	8.62	8.32	8.09	7.67	8.34	7.78	8.16	7.5	7.73	8.38	7.96	8.97	8.25	8.02	7.69	8.86	8.1	8.3	7.48	8.01	7.98	7.7	8.17	7.68	8.07	7.48	7.8	7.64	8.06	7.84	9	8.2	8.75
006Liunnh6nLV9UqIM	7.16	7.18	7.25	7.19	7.19	7.16	7.17	7.18	7.12	7.23	7.21	7.24	7.17	7.21	7.21	7.27	7.19	7.22	7.23	7.22	7.2	7.2	7.21	7.18	7.21	7.02	7.19	7.14	7.19	7.12	7.19	7.06	7.15	7.19	7.2	7.26	7.12	7.14	7.12	7.13	7.11	7.13	7.22	7.22	7.2	7.23	7.18	7.18	7.11
009MP8fUjMNP.KP6uY	7.03	7.06	7.12	7.04	7.06	7.13	7.18	7.09	7.07	7.09	7.13	7.09	7.03	7.08	7.06	7.07	7.04	7.11	7.12	7.18	7.17	7.16	7.11	7.09	7.16	7.01	7.02	7.09	7.13	7.1	7.14	7.13	7.05	7.04	7.13	7.11	7.04	7.05	7.09	7.07	7.09	7.04	7.11	7.13	7.09	7.14	7.08	7.14	7.09
00bNOEUOIiEKKAk1rg	7.22	7.21	7.2	7.27	7.17	7.15	7.25	7.2	7.2	7.17	7.21	7.25	7.15	7.21	7.18	7.27	7.18	7.21	7.22	7.21	7.23	7.33	7.23	7.25	7.39	7.21	7.22	7.2	7.25	7.2	7.2	7.21	7.19	7.2	7.11	7.23	7.17	7.28	7.24	7.23	7.21	7.17	7.3	7.18	7.29	7.23	7.19	7.2	7.25
00buPhOysV5Rpc5VF4	8.86	8.33	8.51	9.04	8.27	8.24	8.41	9.42	8.46	8.08	8.17	8.66	8.43	8.44	8.19	8.47	8.74	9.01	8.27	8.3	8.67	9.22	8.77	8.87	9.09	8.22	8.29	8.33	8.91	8.38	8.64	7.9	9.1	8.91	8.04	8.42	8.34	8.37	8.7	8.57	8.44	7.87	8.05	8.22	7.8	8.42	8.47	8.69	8.64
00Bz3dWp8El2SVLRpc	7.42	8.45	7.42	7.59	7.53	8.24	8.09	8.29	7.34	7.6	7.8	7.82	7.78	7.72	7.85	7.56	7.72	8.26	8.4	8.13	8.36	8.88	8.21	8.37	8.37	7.63	7.66	7.84	8.7	7.74	7.83	8.04	7.73	7.72	7.74	8.08	7.48	8.38	7.76	7.81	8.29	7.73	7.72	7.79	7.99	7.89	8.43	8.84	7.79
00CpxY9XvTXkeCROOE	7.78	7.38	8.8	7.34	7.39	7.67	7.86	7.64	8.09	8.46	7.45	7.48	8	7.53	8.22	8.11	7.51	8.9	7.78	8.13	8.22	7.54	7.44	7.29	7.21	7.88	7.93	8.03	7.37	8.17	7.64	8.08	8.34	7.77	8.67	8.34	7.62	8.69	8.1	7.75	7.66	7.52	7.63	7.73	8.25	7.79	7.93	8.21	7.71
00dHoNunVACOfw_7rk	7.37	7.33	7.33	7.43	7.54	7.65	7.48	7.66	7.34	7.5	7.46	7.64	7.5	7.59	7.51	7.52	7.46	7.58	7.29	7.36	7.26	7.21	7.24	7.19	7.22	7.26	7.57	7.33	7.29	7.26	7.35	7.31	7.33	7.32	7.62	7.22	7.71	7.37	7.34	7.39	7.34	7.57	7.53	7.68	7.36	7.25	7.24	7.37	7.34
00dUVEh0T.M3X0qldU	7.36	7.35	7.34	7.41	7.3	7.41	7.31	7.42	7.38	7.47	7.32	7.34	7.32	7.43	7.3	7.39	7.43	7.42	7.3	7.26	7.29	7.3	7.5	7.59	7.38	7.33	7.28	7.3	7.45	7.32	7.27	7.42	7.31	7.29	7.45	7.45	7.35	7.31	7.28	7.36	7.26	7.37	7.45	7.43	7.27	7.4	7.44	7.35	7.35
00eFeHnqddY606kEFA	7.21	7.21	7.23	7.33	7.28	7.2	7.29	7.22	7.22	7.37	7.26	7.3	7.21	7.31	7.24	7.25	7.23	7.2	7.22	7.22	7.26	7.32	7.34	7.19	7.24	7.26	7.18	7.24	7.21	7.26	7.19	7.27	7.29	7.26	7.27	7.34	7.27	7.25	7.19	7.23	7.21	7.35	7.26	7.23	7.29	7.3	7.39	7.21	7.26
00g6Loa0X10ffPnDdQ	7.77	8.06	7.47	7.93	8.4	7.71	7.51	7.59	7.82	8.61	7.99	8.31	7.73	8.73	7.57	8.03	7.78	7.22	7.96	7.65	7.44	7.42	8.07	7.97	7.38	8.39	7.73	8.33	7.87	7.97	8.18	8.23	7.99	7.67	7.72	8.39	8	8.13	8.04	7.52	8.14	7.99	8.56	7.88	7.72	8.37	9.31	7.73	8.27
00gUiSWokl4nqv99RM	7.41	7.35	7.46	7.32	7.36	7.73	7.58	7.49	7.45	7.8	7.32	7.35	7.69	7.69	7.44	7.36	7.33	7.3	7.96	7.98	7.43	7.21	7.56	7.93	7.23	7.9	7.41	7.53	7.23	7.86	7.43	7.94	7.35	8	7.62	7.63	7.35	7.67	7.48	7.56	7.96	7.45	7.83	7.5	7.6	7.54	7.6	7.45	7.31
00hEykdEipKhWuOoIs	7.2	7.18	7.16	7.14	7.13	7.24	7.14	7.17	7.21	7.15	7.23	7.19	7.24	7.23	7.22	7.17	7.19	7.24	7.22	7.2	7.2	7.2	7.18	7.18	7.17	7.18	7.2	7.19	7.22	7.26	7.2	7.2	7.21	7.24	7.25	7.17	7.17	7.19	7.19	7.18	7.24	7.15	7.25	7.14	7.22	7.22	7.18	7.25	7.17
00hZJT3oWokKJO38Xo	7.33	7.33	7.41	7.32	7.29	7.33	7.31	7.41	7.35	7.24	7.34	7.32	7.33	7.3	7.48	7.3	7.36	7.33	7.71	7.27	7.47	7.24	7.3	7.54	7.23	7.29	7.37	7.32	7.5	7.27	7.38	7.28	7.34	7.52	7.4	7.68	7.34	7.46	7.59	7.42	7.46	7.35	7.33	7.45	7.28	7.28	7.52	7.33	7.42
00iC5OutoN7rzSqJCk	7.32	7.21	7.26	7.22	7.29	7.29	7.2	7.35	7.24	7.28	7.31	7.27	7.22	7.27	7.29	7.31	7.31	7.24	7.19	7.19	7.2	7.18	7.18	7.15	7.18	7.26	7.24	7.25	7.19	7.32	7.25	7.24	7.24	7.28	7.28	7.2	7.26	7.32	7.24	7.2	7.27	7.34	7.24	7.21	7.21	7.22	7.23	7.25	7.22
00iSA6pfpKDMkQKglw	7.86	8.17	8.51	7.74	7.89	7.64	7.88	7.48	7.98	8.43	7.65	7.64	7.59	8.17	7.92	8	7.96	7.41	7.3	7.2	7.29	7.21	7.18	7.18	7.23	7.64	7.61	7.61	7.24	7.41	7.41	7.87	7.54	7.37	8.16	7.39	7.69	7.8	7.37	7.34	7.47	7.67	8.25	8.04	7.93	7.32	7.42	7.29	7.76
00J1Lf61s7pu1npjHk	7.1	7.31	7.17	7.16	7.11	7.15	7.16	7.09	7.06	7.16	7.13	7.07	7.14	7.15	7.12	7.12	7.08	7.12	7.18	7.18	7.2	7.18	7.18	7.14	7.16	7.11	7.1	7.13	7.2	7.16	7.15	7.12	7.13	7.15	7.08	7.16	7.09	7.06	7.14	7.12	7.11	7.19	7.16	7.1	7.21	7.14	7.17	7.13	7.11
00jpfjM6gw2_SirKoA	7.3	7.3	7.28	7.22	7.28	7.34	7.18	7.28	7.26	7.35	7.19	7.16	7.21	7.26	7.27	7.17	7.23	7.18	7.16	7.18	7.21	7.17	7.19	7.14	7.2	7.32	7.3	7.3	7.15	7.32	7.25	7.34	7.37	7.22	7.3	7.21	7.25	7.31	7.27	7.28	7.29	7.25	7.24	7.21	7.22	7.14	7.17	7.31	7.19
00K3OeGXV631V5_6eA	10.58	9.78	10.62	9.87	9.86	10.93	10.34	9.68	9.57	9.97	10.48	10.09	10.19	9.43	10.83	9.64	9.41	9.82	10.93	10.14	9.82	9.49	10.21	11.05	9.96	10.7	10.05	9.77	9.75	9.6	10.17	10.36	9.96	10.35	9.56	9.76	9.72	9.25	9.95	10.06	10.55	10.05	9.97	9.14	10.52	10.21	9.63	9.86	9.72
00KDWcAhTklGiVKCUU	7.13	7.17	7.15	7.14	7.19	7.17	7.16	7.19	7.19	7.21	7.18	7.16	7.16	7.25	7.14	7.2	7.2	7.21	7.13	7.17	7.17	7.09	7.08	7.06	7.12	7.1	7.19	7.13	7.13	7.16	7.17	7.18	7.1	7.12	7.24	7.14	7.17	7.12	7.11	7.18	7.21	7.18	7.15	7.21	7.19	7.11	7.13	7.17	7.19
00kISSCSgiJaWghHxU	7.17	7.14	7.13	7.07	7.14	7.19	7.15	7.18	7.12	7.16	7.21	7.16	7.17	7.08	7.12	7.19	7.16	7.14	7.16	7.17	7.18	7.17	7.18	7.17	7.17	7.19	7.17	7.11	7.04	8.78	7.2	7.15	7.11	7.14	7.25	7.15	7.15	7.13	7.09	7.17	7.18	7.17	7.17	7.2	7.18	7.1	7.18	7.16	7.15
00n06eXSvbrBSgxLVA	7.17	7.12	7.18	7.16	7.21	7.14	7.11	7.18	7.21	7.16	7.17	7.19	7.18	7.19	7.12	7.16	7.14	7.15	7.18	7.26	7.25	7.18	7.2	7.18	7.2	7.18	7.24	7.17	7.23	7.18	7.2	7.23	7.2	7.18	7.17	7.14	7.23	7.17	7.24	7.16	7.24	7.18	7.11	7.18	7.17	7.2	7.15	7.18	7.19
00nHeBI8cKU3XTdwqI	8.88	8.93	9.41	8.76	9.93	8.92	8.41	8.15	8.78	10.47	9.49	8.11	8.65	8.85	9.21	9.15	9.76	10.14	7.94	7.26	8.26	9.06	7.73	8.04	8.02	8.61	9.99	7.59	8.37	8.11	8.32	7.96	9.01	8.39	9.38	8.22	8.84	9.28	8.25	7.98	8.01	8.89	9.35	10.16	8.9	7.93	8.4	8.16	8.39
00oqlCBSqlNAJNqP6Q	8.69	8.63	8.38	8.58	8.5	8.32	8.64	8.01	8.62	8.64	8.07	9.03	8.19	8.74	8.43	9.09	8.61	8.83	7.81	7.62	7.98	7.87	7.81	8.27	7.75	8.1	8.49	7.84	7.57	8.05	7.98	7.8	8.08	8.35	8.81	7.84	8.14	8.08	8.01	8.23	8.54	8.51	9.07	8.76	8.38	7.61	7.83	8.07	7.89
00oy974KnwXq1XB62U	7.18	7.18	7.13	7.31	7.18	7.14	7.1	7.11	7.14	7.06	7.19	7.14	7.11	7.11	7.19	7.16	7.13	7.15	7.13	7.16	7.19	7.09	7.12	7.06	7.14	7.14	7.16	7.08	7.12	7.14	7.15	7.14	7.12	7.14	7.18	7.09	7.13	7.06	7.08	7.07	7.12	7.14	7.19	7.2	7.12	7.15	7.13	7.14	7.12
00pEqV6igq4IA9RfWA	7.38	7.32	7.5	7.17	7.44	7.26	7.48	7.28	7.17	7.16	7.24	7.19	7.59	7.13	7.47	7.25	7.22	7.64	7.24	7.18	7.28	7.17	7.21	7.17	7.19	7.17	7.31	7.18	7.17	7.48	7.17	7.31	7.21	7.24	7.18	7.25	7.3	7.14	7.52	7.42	7.3	7.19	7.38	7.7	7.25	7.21	7.21	7.32	7.17
00R.ckilG1UDr9KoUo	7.23	7.26	7.34	7.25	7.22	7.28	7.22	7.19	7.23	7.16	7.19	7.16	7.26	7.28	7.13	7.32	7.2	7.18	7.21	7.19	7.21	7.17	7.17	7.16	7.2	7.22	7.27	7.25	7.22	7.25	7.22	7.21	7.22	7.12	7.17	7.18	7.23	7.14	7.29	7.3	7.17	7.16	7.24	7.17	7.21	7.27	7.23	7.19	7.12
00s.Qh4rh3iEgholLo	7.13	7.14	7.22	7.11	7.19	7.13	7.13	7.2	7.17	7.11	7.19	7.2	7.16	7.14	7.14	7.17	7.15	7.2	7.17	7.17	7.21	7.12	7.09	7.14	7.12	7.21	7.21	7.25	7.13	7.23	7.19	7.14	7.15	7.16	7.15	7.13	7.17	7.15	7.16	7.21	7.21	7.22	7.14	7.21	7.16	7.12	7.16	7.19	7.19
00s7kqCF66jfRzqlAk	7.25	7.27	7.3	7.22	7.28	7.34	7.26	7.26	7.26	7.24	7.23	7.24	7.19	7.37	7.3	7.25	7.31	7.33	7.15	7.17	7.21	7.23	7.19	7.18	7.2	7.23	7.27	7.27	7.22	7.25	7.29	7.19	7.27	7.25	7.26	7.19	7.21	7.2	7.24	7.22	7.31	7.16	7.21	7.25	7.25	7.22	7.22	7.27	7.31
00Tc6eMnkdH3z93tzo	7.1	7.14	7.1	7.12	7.17	7.15	7.16	7.11	7.12	7.13	7.19	7.13	7.1	7.07	7.15	7.07	7.16	7.13	7.16	7.18	7.21	7.19	7.19	7.18	7.16	7.12	7.13	7.11	7.18	7.05	7.11	7.13	7.14	7.13	7.12	7.15	7.08	7.14	7.11	7.11	7.14	7.2	7.09	7.13	7.1	7.16	7.16	7.16	7.08
00uan3enjEdlOhfnNU	7.12	7.19	7.16	7.16	7.17	7.15	7.13	7.2	7.18	7.11	7.18	7.13	7.08	7.15	7.15	7.27	7.13	7.12	7.2	7.17	7.2	7.18	7.18	7.17	7.18	7.15	7.13	7.19	7.16	7.19	7.15	7.16	7.22	7.18	7.15	7.14	7.16	7.24	7.2	7.14	7.16	7.17	7.29	7.16	7.18	7.13	7.15	7.14	7.18
00uHSC6AkVLiFyLqi0	7.32	7.3	7.29	7.28	7.36	7.31	7.4	7.4	7.33	7.27	7.29	7.26	7.41	7.32	7.36	7.24	7.32	7.23	7.2	7.19	7.25	7.21	7.22	7.18	7.3	7.31	7.41	7.4	7.26	7.32	7.34	7.34	7.36	7.36	7.31	7.24	7.36	7.35	7.35	7.45	7.35	7.35	7.28	7.34	7.34	7.32	7.2	7.39	7.37
00uJrpKM8OIdIl6G50	7.25	7.27	7.2	7.21	7.26	7.16	7.22	7.17	7.22	7.12	7.18	7.2	7.18	7.18	7.2	7.16	7.21	7.16	7.26	7.2	7.23	7.22	7.29	7.56	7.21	7.25	7.2	7.22	7.23	7.27	7.18	7.2	7.26	7.26	7.18	7.27	7.25	7.2	7.23	7.22	7.21	7.25	7.22	7.24	7.22	7.29	7.2	7.24	7.3
00VIiurwh68IWSLSFk	7.14	7.22	7.2	7.09	7.18	7.22	7.21	7.15	7.16	7.26	7.18	7.17	7.15	7.12	7.16	7.2	7.15	7.12	7.12	7.17	7.18	7.09	7.12	7.13	7.13	7.17	7.22	7.2	7.14	7.21	7.2	7.14	7.16	7.16	7.15	7.12	7.15	7.19	7.16	7.21	7.17	7.23	7.16	7.17	7.18	7.1	7.14	7.14	7.17
00W310Z3_qIJ0OoSFU	7.39	7.41	7.38	7.39	7.35	7.41	7.37	7.37	7.44	7.35	7.32	7.37	7.46	7.39	7.36	7.41	7.38	7.46	7.56	7.66	7.55	7.76	7.68	7.72	7.79	7.54	7.38	7.46	7.46	7.42	7.42	7.41	7.42	7.44	7.37	7.57	7.46	7.35	7.58	7.45	7.44	7.35	7.37	7.37	7.4	7.62	7.58	7.47	7.34
00YEtQgO7Up5igoti4	7.42	7.73	7.32	7.33	7.78	7.48	7.37	8.33	7.65	8.05	7.31	7.72	7.58	7.33	7.54	7.31	7.58	8.42	7.35	7.2	7.24	7.18	7.18	7.18	7.23	7.48	7.52	7.42	7.43	7.44	7.5	7.38	7.55	7.28	7.43	7.27	7.9	7.32	7.85	7.38	7.65	7.37	7.31	7.29	7.59	7.24	7.64	7.58	7.57
00ygAQPKEwBwDwQD08	7.12	7.18	7.13	7.1	7.19	7.09	7.13	7.1	7.17	7.04	7.09	7.11	7.27	7.12	7.14	7.12	7.14	7.09	7.1	7.17	7.17	7.09	7.06	7.07	7.09	7.19	7.21	7.17	7.13	7.15	7.24	7.19	7.14	7.08	7.18	7.09	7.19	7.24	7.16	7.14	7.17	7.18	7.15	7.14	7.16	7.11	7.12	7.16	7.15
01.3t3kBX0tqX06Lnk	8.21	8.12	7.74	7.25	7.61	8.64	8.1	7.63	8.67	8.48	7.49	7.97	8.7	7.72	8.86	7.71	7.44	7.92	9.62	7.6	7.43	7.69	7.3	7.23	7.48	8.05	7.46	7.95	7.38	8.06	7.24	7.49	7.4	7.73	8.42	7.65	7.19	8.48	7.27	8.13	7.23	7.58	7.71	7.14	9.22	7.39	7.23	7.25	7.23
01.hTeR.P6CgkqntRU	7.45	7.52	7.53	7.4	7.58	7.5	7.39	7.45	7.5	7.54	7.43	7.41	7.48	7.49	7.5	7.44	7.39	7.35	7.77	7.67	7.61	7.65	7.63	7.81	7.59	7.71	7.42	7.56	7.57	7.54	7.74	7.46	7.52	7.61	7.44	7.71	7.46	7.5	7.55	7.47	7.68	7.36	7.49	7.65	7.53	7.76	7.65	7.48	7.6
0106ep0.a1f3X61SF8	11.82	11.23	11.66	11.01	10.85	12.51	11.39	11.1	10.84	11.34	11	11.29	11.11	11.61	10.87	11.15	10.91	10.76	11.52	11.36	12.04	12.12	11.86	11.99	12.04	11.98	11.51	11.41	12.04	12.74	11.52	12.3	12.39	11.79	11.56	12.06	11.24	12.92	11.68	12.15	11.35	11.18	11.24	11.06	10.98	12.1	11.99	12.03	12.33
0116csjnjpXq4U1C6c	7.17	7.23	7.16	7.22	7.17	7.2	7.18	7.15	7.22	7.22	7.24	7.18	7.11	7.18	7.19	7.2	7.18	7.21	7.28	7.21	7.2	7.18	7.22	7.19	7.19	7.14	7.19	7.19	7.36	7.14	7.22	7.15	7.13	7.23	7.09	7.22	7.1	7.1	7.15	7.22	7.18	7.18	7.2	7.18	7.16	7.26	7.21	7.24	7.13
0116E.6qdtJOhJi0lM	7.34	7.27	7.29	7.24	7.33	7.34	7.3	7.36	7.39	7.28	7.35	7.27	7.32	7.25	7.22	7.27	7.28	7.32	7.39	7.65	7.27	7.25	7.24	7.27	7.41	7.43	7.27	7.39	7.28	7.38	7.47	7.34	7.42	7.29	7.3	7.34	7.29	7.35	7.32	7.36	7.41	7.34	7.29	7.27	7.37	7.25	7.34	7.37	7.3
012ie0dpZ5X3WRXqPM	7.13	7.22	7.25	7.22	7.22	7.29	7.18	7.23	7.21	7.22	7.24	7.2	7.19	7.25	7.22	7.24	7.23	7.22	7.26	7.19	7.25	7.21	7.25	7.2	7.22	7.18	7.26	7.2	7.24	7.17	7.2	7.16	7.15	7.2	7.14	7.32	7.17	7.09	7.16	7.17	7.16	7.17	7.28	7.2	7.17	7.2	7.21	7.19	7.2
012RuCR9VN5N9oR1Ck	8.9	8.16	9.43	8.66	8.12	8.44	8.57	8.69	8.82	8.15	8.31	8.21	8.89	8.08	8.32	8.7	8.33	9.31	8.65	8.71	8.87	8.75	8.36	8.42	8.57	8.59	8.41	8.42	8.95	8.59	8.11	9.41	9.31	8.51	8.3	8.87	8.4	8.82	8.54	9.93	9.54	8.19	8.26	8.13	8.86	8.48	9.33	8.92	8.88
013dKBOokuN.6qlE6E	7.41	7.33	7.4	7.34	7.35	7.39	7.36	7.34	7.32	7.34	7.36	7.33	7.3	7.34	7.32	7.24	7.33	7.27	7.28	7.37	7.34	7.4	7.28	7.47	7.28	7.37	7.27	7.45	7.49	7.32	7.36	7.36	7.38	7.43	7.26	7.39	7.28	7.37	7.3	7.43	7.49	7.31	7.31	7.38	7.26	7.45	7.36	7.39	7.31
013fU6Nh3VdyDefk8w	7.2	7.17	7.26	7.23	7.23	7.24	7.16	7.15	7.21	7.22	7.21	7.18	7.19	7.33	7.19	7.21	7.21	7.3	7.24	7.26	7.22	7.29	7.25	7.18	7.2	7.1	7.14	7.19	7.19	7.2	7.14	7.2	7.19	7.2	7.25	7.19	7.18	7.11	7.21	7.26	7.12	7.24	7.21	7.22	7.2	7.17	7.3	7.21	7.18
016sXNQ5AfbyT0ihS4	7.2	7.14	7.21	7.18	7.17	7.21	7.24	7.16	7.22	7.17	7.2	7.23	7.18	7.17	7.2	7.19	7.11	7.18	7.25	7.19	7.2	7.33	7.32	7.2	7.31	7.19	7.2	7.22	7.22	7.24	7.22	7.2	7.19	7.16	7.13	7.25	7.13	7.33	7.22	7.2	7.23	7.23	7.16	7.21	7.22	7.31	7.21	7.18	7.31
017caWUrg25QhlH9Eg	7.18	7.17	7.16	7.2	7.32	7.27	7.2	7.23	7.23	7.18	7.18	7.25	7.2	7.25	7.18	7.16	7.14	7.19	7.34	7.19	7.3	7.23	7.2	7.2	7.3	7.22	7.27	7.26	7.2	7.24	7.24	7.17	7.21	7.25	7.22	7.21	7.2	7.23	7.24	7.26	7.23	7.19	7.14	7.21	7.22	7.22	7.21	7.26	7.18
018jRX7Du8atT.16DY	9.54	9.53	10.26	10.18	10.08	10.45	10.2	10.06	10.19	10.91	9.79	9.72	10.44	10.19	9.91	10.33	10.36	9.83	9.31	8.91	9.26	9.23	8.56	9.04	8.77	10.13	10.41	9.73	9.22	9.64	9.51	10.08	9.82	9.65	9.98	9.4	10.24	10.54	9.44	8.89	9.61	10.41	11.01	10.3	10.75	9.23	9.45	9.14	9.35
019EaQ7_qAcJUnt7uk	8.51	8.41	9.09	8.1	8.28	8.59	8.02	8.22	8.58	9.13	8.3	8.85	8.23	8.99	8.13	8.18	8.2	8.81	8.58	8.34	8.61	8.81	8.44	8.45	8.87	8.48	8.95	8.74	8.95	8.67	8.86	9.37	8.87	8.45	8.75	8.56	8.78	8.91	8.69	8.75	8.84	8.28	8.56	8.21	7.92	8.78	8.84	8.71	9.29
019V11e_VMdJN2jgKk	8.23	7.87	8.44	8.23	8.39	7.85	7.87	7.77	8.88	8.59	8.11	9.04	8.02	8.31	8.81	8.24	8.32	8.47	8.17	8.61	7.91	8.98	7.59	7.93	8.15	8.11	8.14	8.03	8.05	7.74	8.03	7.68	8.11	8.14	7.96	8.05	9.12	7.99	7.65	8.06	7.68	8.1	8.1	7.9	8.66	7.93	8.26	7.9	9.18
01_dSVXiV6X_lDikqc	7.27	7.29	7.27	7.18	7.36	7.22	7.28	7.39	7.27	7.3	7.24	7.29	7.34	7.32	7.3	7.23	7.22	7.27	7.2	7.18	7.22	7.2	7.19	7.22	7.22	7.28	7.25	7.22	7.27	7.22	7.23	7.28	7.29	7.22	7.31	7.14	7.24	7.32	7.27	7.28	7.24	7.3	7.3	7.27	7.24	7.17	7.16	7.27	7.32
01_iIjuJFCnq.s7rqo	8.51	8.65	8.56	8.73	9.1	8.47	8.55	8.46	8.54	8.28	8.77	8.57	8.57	9.05	8.44	8.55	8.39	8.42	8.92	8.92	8.75	8.59	8.78	8.54	8.56	9.05	8.49	9.44	8.7	8.78	8.79	8.68	8.9	8.71	8.45	8.72	8.45	8.68	8.65	8.64	8.81	8.53	9.43	8.44	8.48	8.65	8.87	8.57	8.49
01Bxeih9poqa9O9Oig	8.47	8.28	9.09	8.05	8.65	7.96	8.08	8.04	8.35	8.94	7.9	8.81	9.74	8.31	8.71	8.1	8.31	7.86	8.75	9.1	9.26	8.33	9.21	8.57	9.06	9.18	8.31	9.03	8.72	9.34	9.11	10.59	9.1	9.05	8.66	8.97	8.22	8.89	9.01	10.38	8.56	8.33	9.25	8.37	8.31	8.88	8.82	9.5	9.05
01BXNAw4H3SIpN6rXo	7.48	7.89	7.54	7.52	7.35	7.52	7.66	7.73	7.54	7.5	7.57	7.6	7.68	7.44	7.66	7.68	7.51	7.77	7.39	7.42	7.63	7.9	7.53	7.37	7.68	7.49	7.57	7.72	8.24	7.39	7.51	7.41	7.58	8.17	7.68	7.87	8.12	7.62	7.77	7.7	7.56	7.86	7.48	8.3	7.38	7.94	7.54	7.53	7.72
01CjSV4iSvrh.iipLU	7.16	7.14	7.13	7.11	7.18	7.25	7.18	7.16	7.14	7.15	7.17	7.22	7.17	7.13	7.34	7.18	7.49	7.22	7.16	7.17	7.18	7.13	7.17	7.15	7.19	7.13	7.17	7.17	7.16	7.13	7.14	7.19	7.12	7.12	7.24	7.14	7.21	7.11	7.13	7.14	7.27	7.22	7.21	7.1	7.28	7.15	7.17	7.18	7.15
01e9xHqhJIP91W31X0	8.07	8	8.33	8.27	8.26	7.78	7.82	7.73	8.09	8.05	7.99	7.78	8.12	8	7.82	7.86	7.72	8.24	7.56	7.28	7.93	7.42	7.55	7.33	7.48	7.81	7.86	7.7	7.79	7.88	7.84	7.59	7.75	7.9	7.92	7.47	7.8	7.79	7.73	7.78	7.84	7.72	7.92	7.71	8.02	7.77	7.76	7.88	8.08
01eGKp3tdMfXmifPts	7.38	7.3	7.32	7.35	7.31	7.34	7.29	7.31	7.34	7.38	7.33	7.3	7.34	7.26	7.41	7.28	7.33	7.32	7.33	7.52	7.41	7.25	7.44	7.68	7.25	7.36	7.3	7.37	7.38	7.36	7.33	7.33	7.4	7.3	7.3	7.34	7.24	7.19	7.35	7.35	7.29	7.29	7.26	7.25	7.21	7.36	7.28	7.34	7.22
01eq1_jTfdUIS6tKng	7.26	7.44	7.53	7.65	7.5	7.37	7.38	7.34	7.44	7.48	7.51	7.57	7.36	7.5	7.39	7.44	7.35	7.48	7.36	7.5	7.27	7.21	7.21	7.3	7.29	7.32	7.39	7.26	7.58	7.33	7.44	7.33	7.36	7.43	7.3	7.44	7.33	7.31	7.35	7.33	7.31	7.33	7.48	7.55	7.44	7.5	7.72	7.32	7.36
01F4oa7_ivl.6FxR.k	7.42	7.15	7.63	7.08	7.59	8.28	8.68	8.05	7.17	7.14	7.27	7.48	7.67	8.08	7.86	7.1	7.13	8.15	7.23	7.16	7.19	7.17	7.16	7.1	7.18	7.26	7.16	7.06	7.19	7.33	7.62	7.15	7.81	7.22	7.16	8.02	7.16	7.59	7.19	7.14	7.2	7.15	7.32	7.13	9.15	7.22	11.54	7.51	7.14
01F5l3RdLvvPvTzp7k	7.27	7.27	7.22	7.31	7.31	7.19	7.36	7.31	7.32	7.36	7.43	7.36	7.24	7.2	7.27	7.35	7.3	7.28	7.43	7.53	7.32	7.59	7.48	7.79	7.48	7.36	7.35	7.2	7.37	7.27	7.27	7.47	7.36	7.28	7.28	7.29	7.26	7.41	7.44	7.27	7.29	7.26	7.27	7.31	7.36	7.34	7.47	7.25	7.52
01IkVC9SAgpOTRyUSw	7.27	7.35	7.27	7.33	7.33	7.27	7.25	7.23	7.42	7.41	7.37	7.34	7.28	7.31	7.3	7.34	7.24	7.29	7.38	7.58	7.38	7.49	7.55	7.62	7.47	7.33	7.37	7.3	7.38	7.3	7.39	7.37	7.38	7.33	7.31	7.23	7.28	7.46	7.35	7.37	7.35	7.28	7.37	7.28	7.32	7.34	7.31	7.29	7.29
01JIFJ9FVIhBRBJUog	7.51	7.34	7.34	7.32	7.38	7.34	7.39	7.39	7.32	7.42	7.41	7.58	7.37	7.42	7.33	7.52	7.4	7.42	7.69	7.61	7.41	7.43	7.62	7.51	7.49	7.27	7.34	7.24	7.37	7.28	7.36	7.26	7.32	7.26	7.48	7.55	7.43	7.27	7.31	7.25	7.31	7.38	7.5	7.42	7.56	7.46	7.52	7.29	7.36
01kOAIQiAne53VKm1k	7.28	7.33	7.33	7.34	7.42	7.3	7.44	7.28	7.28	7.31	7.5	7.34	7.34	7.34	7.26	7.28	7.31	7.34	7.22	7.36	7.41	7.29	7.39	7.35	7.3	7.29	7.34	7.28	7.4	7.28	7.36	7.3	7.36	7.39	7.25	7.3	7.29	7.33	7.38	7.28	7.43	7.23	7.35	7.28	7.34	7.31	7.32	7.29	7.38
01Kwhd4ywHEfrrnFOI	7.16	7.12	7.16	7.14	7.18	7.2	7.05	7.18	7.25	7.13	7.2	7.18	7.15	7.18	7.14	7.11	7.17	7.17	7.15	7.17	7.18	7.15	7.15	7.17	7.2	7.19	7.3	7.18	7.17	7.19	7.18	7.11	7.17	7.09	7.18	7.11	7.13	7.19	7.24	7.14	7.19	7.15	7.14	7.11	7.41	7.12	7.15	7.18	7.21
01mSiNFBelhJeSdiCg	7.14	7.19	7.24	7.18	7.21	7.22	7.2	7.22	7.13	7.17	7.22	7.2	7.24	7.26	7.17	7.14	7.22	7.38	7.31	7.35	7.35	7.25	7.49	7.56	7.56	7.23	7.21	7.23	7.39	7.15	7.21	7.27	7.18	7.29	7.19	7.3	7.23	7.15	7.18	7.15	7.18	7.19	7.2	7.24	7.2	7.29	7.28	7.21	7.2
01MZ9P1q31ve7nkqfk	7.25	7.22	7.2	7.24	7.29	7.25	7.23	7.25	7.24	7.2	7.18	7.29	7.23	7.22	7.25	7.2	7.2	7.33	7.23	7.33	7.25	7.28	7.31	7.23	7.32	7.23	7.15	7.23	7.29	7.23	7.22	7.2	7.27	7.27	7.23	7.28	7.2	7.24	7.23	7.26	7.22	7.26	7.21	7.2	7.29	7.35	7.25	7.21	7.23
01NdtFiuqdphipdxF4	7.2	7.16	7.18	7.16	7.16	7.19	7.15	7.09	7.17	7.2	7.26	7.16	7.15	7.18	7.18	7.22	7.25	7.23	7.23	7.3	7.2	7.21	7.25	7.19	7.28	7.22	7.17	7.22	7.18	7.21	7.17	7.24	7.23	7.21	7.19	7.22	7.17	7.19	7.16	7.11	7.19	7.16	7.1	7.15	7.21	7.19	7.18	7.16	7.19
01nqG0MoB6oPHuz_d0	7.3	7.25	7.33	7.23	7.32	7.24	7.2	7.3	7.55	7.39	7.43	7.54	8.06	7.57	7.56	7.86	7.26	7.15	7.18	7.18	7.21	7.2	7.13	7.13	7.17	7.25	7.32	7.21	7.18	7.46	7.32	7.25	7.19	7.17	7.8	7.19	7.17	7.53	7.2	7.24	7.2	7.27	7.4	7.15	7.7	7.2	7.15	7.23	7.15
01Q9wU2ppjvkwMCFZo	7.23	7.21	7.18	7.11	7.2	7.16	7.16	7.17	7.18	7.14	7.22	7.22	7.19	7.21	7.19	7.16	7.23	7.09	7.22	7.21	7.2	7.19	7.2	7.16	7.18	7.2	7.11	7.19	7.16	7.11	7.15	7.18	7.18	7.21	7.17	7.2	7.17	7.15	7.12	7.18	7.15	7.15	7.19	7.2	7.12	7.17	7.22	7.2	7.17
01R_Ikl3F4VXoUSIlE	9.48	8.63	9.97	9.47	8.87	9.49	9.21	9.3	9.15	9.55	8.78	8.63	9.74	9.04	8.6	8.81	9.27	9.21	9.37	8.44	9.71	9.39	8.32	8.99	8.92	9.43	8.58	8.2	8.99	8.73	8.15	8.33	8.04	8.97	8.46	8.64	8.39	9.03	8.88	8.83	8.82	8.61	8.77	8.41	8.72	8.52	9.18	8.55	8.82
01R_SNSpP0itIiKKik	7.17	7.31	7.37	7.38	7.32	7.23	7.24	7.32	7.28	7.32	7.26	7.24	7.28	7.34	7.26	7.24	7.26	7.19	7.39	7.23	7.31	7.2	7.21	7.2	7.28	7.29	7.21	7.37	7.21	7.29	7.29	7.27	7.33	7.25	7.25	7.25	7.23	7.27	7.34	7.24	7.21	7.28	7.28	7.34	7.2	7.25	7.27	7.32	7.25
01ROk9LTbN58t13bW4	7.19	7.17	7.11	7.12	7.23	7.22	7.26	7.23	7.19	7.27	7.22	7.27	7.23	7.23	7.21	7.27	7.22	7.21	7.2	7.18	7.19	7.16	7.2	7.16	7.19	7.17	7.21	7.16	7.17	7.27	7.22	7.2	7.16	7.21	7.33	7.17	7.16	7.23	7.18	7.18	7.19	7.25	7.3	7.22	7.34	7.11	7.17	7.13	7.15
01SF9LhO_LIHnkLITU	7.15	7.11	7.09	7.28	7.13	7.14	7.11	7.12	7.16	7.2	7.04	7.11	7.13	7.17	7.12	7.21	7.14	7.15	7.15	7.2	7.2	7.18	7.18	7.16	7.16	7.15	7.13	7.13	7.16	7.12	7.13	7.14	7.12	7.17	7.19	7.17	7.17	7.19	7.1	7.13	7.13	7.2	7.14	7.17	7.19	7.16	7.18	7.09	7.08
01SPxdeqip6HkKUe08	7.46	7.25	7.28	7.22	7.28	7.36	7.27	7.29	7.29	7.26	7.27	7.22	7.25	7.31	7.33	7.28	7.27	7.34	7.58	7.48	7.28	8.4	7.63	7.7	7.55	7.27	7.28	7.34	7.29	7.27	7.36	7.37	7.26	7.31	7.32	7.53	7.48	7.26	7.39	7.39	7.41	7.26	7.32	7.31	7.35	7.37	7.22	7.3	7.22
01SqMCHwpCr8tQi_xI	7.34	7.39	7.36	7.3	7.3	7.32	7.42	7.33	7.28	7.3	7.25	7.26	7.37	7.29	7.35	7.26	7.35	7.3	7.4	7.3	7.41	7.37	7.25	7.38	7.36	7.35	7.34	7.31	7.33	7.3	7.34	7.37	7.32	7.36	7.34	7.35	7.31	7.28	7.36	7.35	7.32	7.31	7.34	7.29	7.3	7.21	7.24	7.35	7.27
01STVdFQEdfXpc3aHg	9.56	9.14	10.27	9.52	8.87	9.06	10.01	8.35	8.87	9.15	9.09	8.83	10.13	9.29	9.11	9.42	9.53	10.65	8.55	8.73	9.16	8.86	9.32	9.02	9.06	8.11	9.03	8.89	9.32	8.88	9.04	8.52	9.06	9.05	9.35	9.47	8.67	9.19	9.63	9.22	9.17	8.43	9.04	9.53	9.95	8.92	9.63	8.47	9
01Tv.FeVeX48h1yRek	9.41	8.91	8.08	9.87	8.97	8.11	9.63	9.74	8.79	8.39	9.21	10.6	9.4	8.88	8.53	9.72	9.08	7.81	8.82	8.87	9.4	10.58	11.61	11.03	11.16	9.6	10.18	9.61	10.98	10.42	10.07	8.96	10.32	9.7	9.48	10.97	11.32	10.51	10.45	10.08	11.88	9.87	8.5	9.72	7.91	11.02	9.31	10.15	10.68
01U3U31EEhL_BJZFHU	7.25	7.27	7.25	7.26	7.23	7.18	7.19	7.22	7.27	7.27	7.2	7.23	7.22	7.23	7.26	7.22	7.2	7.22	7.24	7.25	7.23	7.2	7.29	7.26	7.24	7.25	7.23	7.22	7.26	7.25	7.23	7.27	7.2	7.24	7.26	7.28	7.22	7.18	7.21	7.26	7.18	7.29	7.29	7.24	7.24	7.31	7.22	7.27	7.17
01UhJSClf5y.frH0ug	7.21	7.44	7.24	7.27	7.18	7.28	7.29	7.22	7.03	7.36	7.35	7.19	7.21	7.13	7.23	7.44	7.21	7.33	7.24	7.2	7.75	7.2	7.19	7.21	7.26	7.36	7.31	7.29	7.27	7.22	7.18	7.24	7.22	7.12	7.25	7.22	7.32	7.31	7.31	7.16	7.25	7.43	7.47	7.24	7.62	7.25	7.27	7.1	7.23
01UUx0HlQEnqKeR33k	7.14	7.19	7.22	7.19	7.17	7.2	7.21	7.27	7.19	7.13	7.17	7.22	7.21	7.22	7.2	7.19	7.19	7.27	7.4	7.24	7.34	7.44	7.27	7.27	7.26	7.21	7.13	7.24	7.36	7.22	7.2	7.22	7.2	7.23	7.28	7.28	7.22	7.18	7.25	7.24	7.23	7.16	7.16	7.22	7.14	7.35	7.22	7.21	7.21
01VffJVPxVv7oKR52c	7.26	7.31	7.39	7.28	7.27	7.28	7.27	7.29	7.31	7.37	7.35	7.31	7.27	7.22	7.25	7.3	7.34	7.34	7.24	7.19	7.21	7.25	7.22	7.24	7.24	7.25	7.17	7.24	7.27	7.19	7.22	7.2	7.32	7.19	7.19	7.18	7.29	7.17	7.24	7.17	7.19	7.22	7.3	7.23	7.38	7.24	7.32	7.2	7.19
01VInuuSepAnQXkpgg	7.22	7.2	7.23	7.22	7.24	7.17	7.22	7.25	7.19	7.2	7.23	7.2	7.24	7.16	7.16	7.18	7.14	7.17	7.28	7.43	7.2	7.21	7.3	7.18	7.28	7.6	7.15	7.23	7.3	7.31	7.16	7.24	7.28	7.21	7.14	7.21	7.18	7.2	7.25	7.12	7.19	7.17	7.12	7.13	7.22	7.21	7.29	7.11	7.22
01Xd110F6gx9ITdQHQ	7.26	7.35	7.36	7.49	7.49	7.19	7.24	7.18	7.59	7.44	7.33	7.45	7.27	7.25	7.31	7.41	7.48	7.49	7.3	7.31	7.25	7.31	7.2	7.18	7.19	7.19	7.26	7.18	7.23	7.2	7.14	7.28	7.61	7.19	7.26	7.32	7.43	7.2	7.22	7.15	7.19	7.25	7.2	7.26	7.27	7.31	7.6	7.31	7.24
01YintXoV6ek6AxLqA	10.94	11.24	10.5	10.07	10.1	10.63	10.16	10.27	10.74	10.91	11.19	10.09	11.09	11.42	10.22	10.64	10.7	10.79	11.03	10.8	11.06	10.61	10.47	10.11	11.32	10.8	10.94	11.08	10.23	11.36	10.69	11.45	10.89	10.64	10.82	9.77	10.59	10.83	10.88	10.74	10.79	10.59	11.35	10.6	10.8	9.87	10.79	11.05	10.99
01Z9Im2lUSFyOpCMUA	7.21	7.13	7.13	7.2	7.18	7.19	7.23	7.23	7.19	7.21	7.14	7.18	7.22	7.18	7.21	7.23	7.22	7.13	7.15	7.18	7.18	7.1	7.11	7.13	7.15	7.14	7.22	7.18	7.14	7.14	7.21	7.23	7.16	7.1	7.23	7.14	7.21	7.22	7.15	7.21	7.22	7.21	7.25	7.2	7.16	7.12	7.12	7.2	7.18
01ZKfb_XUgX1bePvXU	8.2	7.24	7.44	8.21	8.9	7.3	8.2	7.37	7.95	7.38	11	7.4	7.62	7.36	8.25	9.62	8.19	7.22	7.16	9.56	7.19	7.18	7.14	7.16	7.2	7.29	7.51	7.45	7.4	7.72	7.2	7.23	8.7	8.13	9.29	7.91	7.29	8.09	7.33	7.92	9.04	8.47	7.4	7.38	7.42	7.99	7.73	7.75	7.4
02.s3vpcuhJ7l65F3o	8.34	8.18	8.53	9.31	10.03	8.56	9.51	8.94	7.96	8.12	9.44	9.36	9.06	8.94	9.31	8.47	9.53	9.07	9.21	9.04	9.79	10.69	9.48	9.29	11.85	8.64	9.94	8.61	10.05	9.17	8.95	8.3	8.97	10.32	8.82	10.1	9.41	8.54	10.09	9.36	9.24	8.54	8.68	10.37	7.75	9.14	8.79	9.57	8.89
026KI4KS6ERJOiA19k	7.91	7.73	8.93	7.73	7.67	8.65	7.74	7.61	8.79	8.33	7.68	7.87	7.94	7.73	8.18	8.35	8.15	8.23	8.26	8.5	7.64	7.42	7.17	7.18	8.96	7.47	8.18	8.25	7.37	7.48	7.11	8.79	7.52	8.32	8.56	8.44	8.38	8.32	7.46	7.8	8.72	8.11	8.05	7.22	8.19	7.62	7.6	7.93	7.54
02ed7lfr7.uute21ds	7.3	7.3	7.32	7.32	7.54	7.35	7.29	7.31	7.34	7.39	7.35	7.36	7.37	7.27	7.22	7.38	7.32	7.41	7.31	7.18	7.21	7.23	7.21	7.2	7.2	7.33	7.33	7.31	7.23	7.3	7.26	7.28	7.28	7.29	7.34	7.19	7.4	7.39	7.33	7.28	7.29	7.31	7.35	7.33	7.44	7.23	7.2	7.31	7.42
02iM.yq7ooqgqKDqUU	7.68	7.61	7.56	7.62	7.71	7.53	7.47	7.45	7.75	7.87	7.58	7.76	7.29	7.86	7.56	7.49	7.49	7.45	7.63	7.63	7.76	7.67	7.46	7.83	7.87	7.91	7.49	7.88	7.58	7.52	7.69	7.79	7.54	7.71	7.61	7.58	7.52	7.6	7.44	7.44	7.89	7.44	7.78	7.47	7.7	7.66	7.5	7.6	7.58
02K3SKpJSNpaiVPq_0	7.27	7.28	7.27	7.32	7.3	7.27	7.33	7.24	7.29	7.31	7.23	7.18	7.22	7.17	7.25	7.2	7.3	7.27	7.21	7.19	7.24	7.2	7.21	7.19	7.18	7.24	7.2	7.3	7.21	7.28	7.21	7.22	7.28	7.25	7.24	7.19	7.19	7.25	7.22	7.24	7.28	7.3	7.26	7.3	7.19	7.18	7.21	7.32	7.19
02KG50KOEI6l0L36kU	7.23	7.15	7.13	7.3	7.09	7.11	7.15	7.19	7.14	7.1	7.16	7.06	7.2	7.1	7.11	7.21	7.1	7.3	7.17	7.18	7.17	7.1	7.16	7.09	7.16	7.07	7.13	7.11	7.16	7.2	7.16	7.14	7.2	7.19	7.16	7.16	7.08	7.11	7.17	7.16	7.1	7.1	7.18	7.31	7.13	7.12	7.11	7.15	7.18
02orvp2pd9m6WuGX6c	7.14	7.29	7.24	7.18	7.1	7.37	7.22	7.19	7.18	7.15	7.22	7.22	7.17	7.24	7.15	7.22	7.16	7.13	7.46	7.54	7.21	7.22	7.2	7.2	7.23	7.2	7.2	7.37	7.21	7.18	7.17	7.16	7.17	7.15	7.16	7.22	7.2	7.16	7.23	7.2	7.17	7.18	7.3	7.18	7.24	7.34	7.2	7.16	7.21
02tiuhr_lsCu6c8E64	13.92	14.59	13.63	13.71	13.9	12.98	13.68	13.4	14.18	13.7	14.23	13.89	13.56	14.19	14.3	13.81	13.68	13.79	13.4	13.82	13.78	14.12	13.99	14.24	13.67	13.73	13.4	14.41	13.69	13.95	13.6	13.48	13.47	13.51	13.75	13.71	13.41	14.06	13.55	13.73	13.64	13.55	13.53	13.54	13.75	13.92	13.65	13.67	14.13
030QKXgnb0f5qrU6yo	7.62	7.52	7.64	7.72	7.6	7.51	7.53	7.53	7.58	7.41	7.42	7.52	7.58	7.55	7.47	7.6	7.6	7.51	7.9	7.9	7.5	8	7.7	7.85	7.91	7.63	7.4	7.55	7.34	7.61	7.65	7.64	7.72	7.74	7.55	7.69	7.4	7.56	7.5	7.6	7.63	7.45	7.47	7.55	7.48	7.6	7.72	7.56	7.52
033EV_UdAuK3igpSTU	7.18	7.26	7.24	7.18	7.25	7.34	7.3	7.29	7.19	7.14	7.18	7.29	7.25	7.29	7.29	7.17	7.18	7.23	7.22	7.19	7.22	7.24	7.2	7.32	7.22	7.29	7.26	7.25	7.23	7.22	7.25	7.23	7.26	7.38	7.19	7.24	7.18	7.26	7.22	7.24	7.24	7.17	7.24	7.16	7.19	7.26	7.25	7.22	7.24
0377gjr6eNCOEeLBX0	8.09	8.5	8.63	8.28	9.27	8.31	8.09	8.13	8.76	9.33	8.6	9.56	8.3	10.28	8.75	8.98	9.02	8.51	7.13	7.19	7.19	7.1	7.12	7.07	7.16	7.41	8.39	7.38	7.16	7.22	7.23	7.61	7.44	7.23	9.06	7.1	8.6	7.86	7.25	7.28	7.48	8.9	10.06	9.79	9.59	7.15	7.17	7.36	8.11
03_uEdXP1cFUG6SLaU	7.32	7.25	7.31	7.31	7.3	7.33	7.31	7.34	7.25	7.31	7.28	7.26	7.29	7.3	7.33	7.3	7.27	7.25	7.34	7.25	7.33	7.25	7.3	7.18	7.28	7.34	7.36	7.42	7.22	7.33	7.23	7.34	7.24	7.28	7.31	7.37	7.32	7.35	7.32	7.34	7.25	7.31	7.31	7.24	7.26	7.22	7.29	7.39	7.29
03APwAO9yywIIwOXzc	7.2	7.12	7.18	7.15	7.16	7.18	7.13	7.13	7.16	7.23	7.11	7.13	7.14	7.16	7.15	7.09	7.1	7.15	7.19	7.18	7.19	7.2	7.19	7.18	7.2	7.25	7.17	7.15	7.25	7.15	7.16	7.25	7.24	7.2	7.18	7.2	7.15	7.2	7.16	7.15	7.21	7.16	7.15	7.08	7.09	7.22	7.18	7.19	7.19
03BC50iK6CFO3nAiAo	9.39	10.07	9.72	9.18	9.12	9.39	9.88	10.12	10.43	10.77	10.86	9.32	10.24	9.52	10.02	10.09	9.64	8.97	8.16	8.19	8.13	7.91	8.08	8.19	7.97	8.32	10.37	8.28	7.76	8.03	8.17	8.83	7.85	7.85	10.3	7.77	9.98	8.46	7.76	8.05	7.95	9.98	11.32	10.19	11.04	7.84	7.77	7.97	8.32
03e0oyS6Ir9uUuUnUU	8.13	8.05	8.1	8.24	7.77	8.19	8.04	8.07	8	7.65	7.36	7.62	8.21	8.37	8.02	7.72	7.72	8.33	8.34	7.75	8.39	7.42	7.74	7.59	7.64	8.05	7.95	7.81	8.02	8.06	8.08	7.36	8.06	8.05	7.85	8.35	7.62	7.79	8.32	8.14	7.93	7.7	7.85	8.35	8.11	8.07	8.1	7.7	7.51
03fdpAuAgmuCulPjkg	7.41	7.17	7.21	7.16	7.15	7.13	7.17	7.15	7.18	7.11	7.14	7.58	7.2	7.15	7.2	7.21	7.18	7.15	7.16	7.18	7.19	7.16	7.2	7.16	7.16	7.12	7.21	7.24	7.18	7.11	7.41	7.15	7.09	7.17	7.14	7.16	7.35	7.16	7.2	7.16	7.21	7.21	7.16	7.28	7.06	7.15	7.17	7.25	7.21
03FVHFl.P3c.V_X00U	8.07	8.54	8.71	8.1	8.17	7.85	7.68	7.81	8.54	9.02	8	8.23	7.89	8.05	7.86	8.38	8.05	7.77	8.16	8.62	8.74	8.75	8.45	8.87	8.25	8.97	7.96	8.26	8.02	8.49	8	8.65	8.33	8.37	8.32	8.38	8.03	8.71	8.02	7.71	8.32	7.91	8.96	7.92	8.56	8.13	8.42	7.91	8.62
03gq1yNJ7X5KutJKSg	7.03	7.11	7.13	7.13	7.12	7.1	7.12	7.09	7.11	7.05	7.11	7.14	7.11	7.09	7.08	7.1	7.08	7.11	7.15	7.17	7.17	7.12	7.14	7.15	7.08	7.05	7.03	7.1	7.15	7.12	7.1	7.14	7.13	7.09	7.05	7.1	7.03	7.08	7.09	7.09	7.12	7.06	7.06	7.1	7.07	7.1	7.1	7.13	7.12
03JNI0NUINTSQXSFBU	9.55	9.76	9.25	9.92	9.56	9.97	10.15	9.56	11.08	10	9.63	9.97	9.7	10.17	10.06	10.08	9.67	10.06	8.95	8.71	9.14	9.6	9.19	9.43	9.29	8.9	10.25	8.74	9.31	8.83	8.64	9.41	9.19	9.68	9.89	10.16	10.15	9.64	9.47	8.81	9.05	10.36	10.2	10.43	10.04	9.46	12.28	9.35	9.59
03jx1ZLMgC8D5ytAuc	7.19	7.15	7.18	7.12	7.17	7.1	7.18	7.15	7.12	7.13	7.17	7.17	7.09	7.2	7.14	7.12	7.11	7.11	7.2	7.19	7.2	7.19	7.19	7.16	7.2	7.19	7.18	7.18	7.17	7.2	7.18	7.18	7.28	7.18	7.15	7.13	7.13	7.15	7.18	7.15	7.21	7.15	7.15	7.24	7.12	7.16	7.18	7.17	7.24
03kIj3koHq7kRrvslI	11.19	10.61	10.07	11.62	10.89	11.29	11.45	11.2	11.35	10.6	10.76	10.88	11.33	10.05	10.65	11.1	11.79	11.29	11.29	10.5	11.29	12.04	11.93	12.07	11.72	10.8	11.51	11.37	11.04	11.25	11.25	10.63	11.46	11.2	10.96	11.57	11.41	11.13	11.85	11.35	11.06	10.86	10.49	11.11	11.03	11.5	12.99	11.15	11.39
03lUkfpEkoSCSI3gVE	7.24	7.3	7.23	7.53	7.28	7.7	7.33	7.24	7.23	7.27	7.48	7.27	7.33	7.35	7.67	7.36	7.28	7.44	7.47	7.33	7.61	8.21	7.2	7.25	7.28	7.24	7.42	7.28	7.47	7.34	7.27	7.19	7.37	7.55	7.28	7.43	7.23	7.27	7.38	7.4	7.39	7.32	7.85	7.19	7.54	7.29	7.67	7.45	7.29
03lxLuepXquROBCu.o	7.36	7.23	7.29	7.32	7.35	7.31	7.27	7.33	7.31	7.32	7.29	7.39	7.25	7.25	7.37	7.36	7.33	7.34	7.28	7.39	7.27	7.29	7.51	7.23	7.26	7.23	7.32	7.39	7.24	7.35	7.36	7.3	7.29	7.43	7.33	7.23	7.27	7.35	7.27	7.36	7.28	7.3	7.29	7.33	7.39	7.24	7.23	7.36	7.35
03n80MLsvsO0DQwjPQ	7.22	7.35	7.22	7.21	7.23	7.27	7.32	7.29	7.26	7.21	7.3	7.35	7.24	7.22	7.29	7.25	7.22	7.18	7.33	7.85	7.41	7.47	7.35	7.85	7.57	7.25	7.22	7.28	7.54	7.3	7.26	7.2	7.23	7.3	7.23	7.39	7.28	7.2	7.21	7.31	7.24	7.27	7.17	7.3	7.3	7.32	7.37	7.21	7.2
03nx4AQoheq6u6_qt8	7.58	7.55	7.53	7.58	7.54	7.64	7.49	7.56	7.45	7.46	7.63	7.43	7.53	7.58	7.46	7.48	7.47	7.56	7.51	7.87	7.67	7.69	7.65	8.1	7.78	7.51	7.54	7.63	7.68	7.61	7.53	7.67	7.64	7.61	7.42	7.65	7.51	7.37	7.69	7.6	7.55	7.54	7.46	7.55	7.53	7.75	7.58	7.63	7.49
03o4XlyS.VTiMig7cY	7.24	7.22	7.41	7.31	7.41	7.34	7.31	7.42	7.27	7.36	7.22	7.43	7.27	7.51	7.31	7.41	7.36	7.22	7.31	7.19	7.23	7.49	7.18	7.18	7.44	7.31	7.39	7.38	7.36	7.27	7.35	7.78	7.27	7.35	7.27	7.27	7.56	7.31	7.33	7.28	7.24	7.32	7.37	7.33	7.43	7.42	7.34	7.52	7.59
03o84Lopc2WSEUQSSU	7.25	7.15	7.15	7.1	7.08	7.16	7.06	7.17	7.1	12.77	7.22	7.19	7.13	7.12	7.14	7.18	7.15	7.16	7.18	7.17	7.2	7.14	7.19	7.13	7.18	10.65	7.18	7.11	7.15	7.84	7.22	7.15	7.12	7.16	7.18	7.11	7.12	7.14	7.19	7.16	7.19	7.13	7.25	7.43	7.37	7.2	7.15	7.17	7.61
03PBGkfIRue9RfV254	7.3	7.17	7.18	7.27	7.95	7.22	7.14	7.33	7.26	7.45	8.04	7.61	7.22	7.26	7.24	7.36	7.24	7.21	7.12	7.17	7.18	7.26	7.76	7.52	7.66	7.26	7.37	7.14	7.69	7.44	7.2	7.22	7.52	7.31	7.3	7.13	7.3	7.39	7.46	7.63	7.17	7.37	7.33	7.31	7.24	7.56	7.17	7.3	8.51
03pfnDpBIICp9.m61U	11.15	10.53	11.26	11.99	10.58	11.52	10.57	11.64	9.81	8.52	10.96	10.65	11.44	10.02	10.36	10.95	10.66	12.63	10.52	10.12	10.71	11.64	11.22	11.38	12.57	10.71	10.84	10.67	10.42	10.61	11	10.77	11.66	10.66	10.57	10.52	11.29	11.06	10.96	10.63	9.58	10.4	10.9	12.67	10.61	10.82	9.72	11.76	11.18
03pNFQIgoT3XXQUwxQ	7.18	7.25	7.29	7.22	7.14	7.3	7.26	7.27	7.22	7.28	7.23	7.22	7.17	7.27	7.23	7.26	7.2	7.17	7.21	7.19	7.23	7.22	7.2	7.21	7.24	7.22	7.28	7.22	7.23	7.17	7.42	7.24	7.23	7.22	7.23	7.19	7.26	7.17	7.26	7.25	7.22	7.22	7.22	7.23	7.23	7.2	7.29	7.19	7.17
03qk_6e7zHoA5KJk_M	7.31	7.21	7.24	7.23	7.28	7.35	7.29	7.33	7.39	7.21	7.31	7.31	7.38	7.34	7.25	7.27	7.3	7.27	7.35	7.28	7.31	7.28	7.23	7.28	7.2	7.33	7.31	7.43	7.2	7.31	7.33	7.26	7.33	7.3	7.28	7.26	7.31	7.31	7.35	7.36	7.32	7.3	7.28	7.27	7.29	7.22	7.36	7.29	7.35
03QldTaVRSN1Pf5Tio	8.24	8.4	8.35	8.65	8.25	7.98	8.44	7.87	8.16	8.15	7.98	8.26	7.86	8.17	8.18	8.37	7.84	7.86	8.02	7.98	8.07	7.81	7.87	7.94	7.81	8.43	7.79	8.19	7.96	8.37	8.16	8.83	7.93	8.17	7.94	8.22	7.97	8.61	8.25	8.06	8.01	7.99	8.02	8.31	8.31	8.4	8.51	8.01	8.19
03qtwOnM97lOqPyinU	7.46	8.17	7.29	7.81	7.46	7.52	7.48	7.62	7.59	7.21	7.39	7.49	7.32	7.33	7.6	7.65	7.69	7.27	7.55	7.48	7.39	7.2	7.31	7.32	7.38	7.31	7.52	8.17	7.52	7.48	7.93	7.28	7.34	7.64	7.33	7.55	7.4	7.34	7.76	7.33	8.2	7.28	7.21	7.6	7.63	7.59	7.33	7.8	7.75
03R97ulYop6vDnqfrE	8.23	7.9	8.04	8.02	7.94	8.48	8.06	8.31	7.96	7.91	7.91	7.84	7.98	7.91	7.96	7.83	7.98	8.82	8.07	7.79	8.06	8.09	8.15	7.46	8.37	8.08	8.39	8.07	8.19	8.19	8.08	8.13	7.96	8.62	7.82	8.6	8.18	8.1	8.92	8.41	8.35	7.97	8.08	8.14	7.84	8.11	8.24	8.17	8.25
03R_lOnujoE38ALd1w	7.16	7.32	7.29	7.42	7.24	7.27	7.4	7.64	7.72	7.16	7.19	7.17	7.66	7.4	7.57	7.43	7.39	7.35	7.28	7.18	7.31	7.17	7.19	7.13	7.2	7.23	7.26	7.18	7.23	7.18	7.15	7.15	7.24	7.17	7.56	7.25	7.21	7.28	7.11	7.26	7.23	7.63	7.44	7.26	7.36	7.17	7.18	7.1	7.19
03rkgW19TIgcKJSZdU	7.21	7.16	7.21	7.22	7.14	7.17	7.22	7.15	7.24	7.19	7.17	7.33	7.24	7.17	7.25	7.2	7.2	7.23	7.18	7.19	7.2	7.25	7.21	7.18	7.24	7.16	7.19	7.2	7.2	7.19	7.19	7.19	7.25	7.2	7.12	7.25	7.16	7.12	7.19	7.2	7.17	7.16	7.23	7.15	7.14	7.25	7.18	7.15	7.15
03S0ZhZciV4nnPzlm8	7.17	7.21	7.15	7.19	7.22	7.2	7.23	7.14	7.15	7.2	7.16	7.2	7.21	7.26	7.13	7.23	7.16	7.28	7.24	7.21	7.25	7.52	7.27	7.39	7.31	7.21	7.22	7.17	7.47	7.15	7.2	7.21	7.2	7.28	7.21	7.29	7.29	7.13	7.18	7.27	7.18	7.27	7.21	7.26	7.27	7.4	7.34	7.15	7.18
03SuhAuX84AHzJxFOc	7.14	7.12	7.08	7.05	7.11	7.13	7.15	7.12	7.05	7.15	7.08	7.07	7.14	7.07	7.13	7.1	7.05	7	7.09	7.16	7.16	7.02	7.08	6.98	7.11	7.11	7.08	7.16	7.11	7.14	7.14	7.05	7.09	7.08	7.13	7.1	7.09	7.1	7.1	7.12	7.11	7.04	7.12	7.06	7.16	7.08	7.07	7.14	7.08
03tcIuierhIkrkJaX8	7.27	7.08	7.18	7.25	7.15	7.24	7.23	7.33	7.24	7.21	7.17	7.21	7.27	7.14	7.23	7.29	7.2	8.05	7.13	7.18	7.26	7.2	7.14	7.12	7.28	7.27	7.33	7.29	7.22	7.27	7.16	7.74	7.6	7.54	7.22	7.15	7.15	7.64	7.39	7.28	7.25	7.25	7.13	7.57	7.2	7.18	7.12	7.47	7.25
03tSCXVYVVCc.nRPBA	8.91	8.27	8.81	8.59	8.65	8.62	8.95	8.95	8.55	8.73	8.49	8.78	9.22	8.13	8.23	8.51	8.88	9.29	9.08	8.93	9.11	10.04	8.68	8.95	9.02	8.25	8.59	8.8	8.66	8.96	9.12	8.71	9.71	8.84	8.31	8.86	8.6	9.16	9.8	8.56	8.75	9.08	8.22	8.57	8.35	8.85	9.04	8.56	8.35
03TW4WIBonkuopqE54	7.21	7.16	7.21	7.21	7.2	7.23	7.23	7.23	7.25	7.22	7.29	7.18	7.13	7.33	7.2	7.24	7.21	7.25	7.27	7.21	7.34	7.21	7.28	7.66	7.31	7.25	7.19	7.26	7.26	7.22	7.29	7.26	7.22	7.22	7.2	7.28	7.18	7.22	7.17	7.23	7.25	7.15	7.12	7.2	7.13	7.24	7.51	7.24	7.18
03TY7nt3ouMICpxN1Y	7.24	7.65	7.19	7.24	7.23	13.46	7.24	8.31	7.3	7.75	7.22	7.25	10.65	12.1	8.2	9.31	7.29	7.28	8.58	7.19	7.22	7.18	7.21	7.25	7.21	7.59	8.45	7.21	7.21	7.4	7.2	7.21	7.23	11.61	7.2	11.3	7.26	7.76	7.19	7.28	11.19	7.37	7.23	7.3	7.78	7.25	8.96	7.41	7.41
03U10RfeX_151f8JSs	8.04	8.57	7.89	7.51	7.5	7.29	7.34	7.54	7.36	7.46	7.78	7.45	8.22	7.63	7.33	8.08	7.86	7.27	7.33	8.11	7.35	8.12	9.56	7.74	7.81	7.34	7.62	8.68	7.43	7.79	9.01	8.41	8.06	7.32	7.97	7.62	8.25	7.8	7.78	8.46	7.34	7.77	7.52	8.26	7.39	8.59	7.41	7.73	8.73
03uohH6gQBIRXqDkvk	9.54	9.79	8.48	8.76	9.28	8.92	9.23	9.56	8.77	9.38	8.87	8.79	9.34	9.29	8.74	9.27	8.91	8.93	8.65	8.44	9.08	8.68	9.47	8.51	9.31	9.16	9.7	8.43	8.6	8.69	8.74	9.22	9.69	8.49	9.07	8.15	10.18	8.89	9.06	8.96	8.32	9.08	8.67	10.42	8.77	8.26	7.9	9.01	9.71
03V9_i_eopSq7nkuwQ	7.27	7.24	7.3	7.24	7.25	7.32	7.23	7.3	7.29	7.26	7.24	7.21	7.35	7.37	7.23	7.31	7.24	7.25	7.3	7.2	7.22	7.18	7.24	7.2	7.19	7.28	7.15	7.24	7.21	7.25	7.17	7.22	7.25	7.26	7.29	7.23	7.26	7.24	7.25	7.2	7.24	7.22	7.29	7.18	7.28	7.2	7.17	7.24	7.2
03vIIqPgaLqutSs0kk	7.28	7.22	7.25	7.21	7.22	7.22	7.26	7.29	7.29	7.21	7.28	7.23	7.25	7.21	7.26	7.21	7.25	7.24	7.22	7.17	7.23	7.19	7.22	7.18	7.19	7.3	7.18	7.27	7.19	7.22	7.21	7.24	7.21	7.25	7.22	7.18	7.3	7.24	7.32	7.25	7.29	7.22	7.29	7.2	7.22	7.21	7.23	7.26	7.2
03vqr_q1q3VFJR59dc	10.44	10.37	10.43	10.43	11.2	9.95	10.18	10.05	9.66	10.09	9.99	9.96	10.37	9.98	10.24	10.07	9.74	9.95	10.52	10.72	10.32	9.63	10.47	9.81	9.94	10.48	10.02	10.66	11.04	10.34	10.81	11.14	10.52	9.73	9.87	10.31	10.25	9.93	10.13	10.64	9.93	10.26	9.65	9.7	9.42	10.25	10.88	10.52	10.46
03VX3fkcosLibZyCTU	7.25	7.35	7.4	7.44	7.59	7.22	7.25	7.26	7.64	7.42	7.54	7.49	7.29	7.25	7.27	7.44	7.38	7.6	7.24	7.19	7.27	7.2	7.21	7.36	7.21	7.21	7.34	7.24	7.36	7.24	7.19	7.34	7.23	7.18	7.27	7.22	7.26	7.23	7.22	7.17	7.19	7.27	7.45	7.25	7.31	7.43	7.46	7.13	7.27
03XiJYAiklJJC99WaQ	7.31	7.6	7.23	7.36	7.65	7.99	7.46	7.75	7.9	7.37	7.31	7.29	7.64	7.26	7.42	7.29	7.82	7.23	8.99	7.32	7.35	7.21	7.3	7.44	7.52	7.24	7.48	7.48	8.36	7.57	7.33	7.25	7.39	7.44	7.23	7.55	7.22	7.38	7.9	7.4	7.51	7.25	7.26	7.43	7.4	7.46	7.86	7.31	7.38
03XqohKq9x0DAHjlxE	7.67	7.48	7.5	7.54	7.6	7.48	7.59	7.56	7.54	7.52	7.47	7.37	7.54	7.47	7.61	7.47	7.49	7.52	7.3	7.47	7.29	7.23	7.68	7.49	7.42	7.66	7.62	7.62	7.43	7.55	7.63	7.61	7.73	7.42	7.51	7.42	7.58	7.44	7.48	7.53	7.6	7.66	7.44	7.5	7.51	7.32	7.23	7.66	7.36
03XUD6iwQJCpUCSlFE	7.13	7.2	7.27	7.24	7.22	7.19	7.09	7.14	7.19	7.22	7.21	7.2	7.17	7.3	7.26	7.25	7.21	7.2	7.26	7.28	7.44	7.23	7.24	7.23	7.23	7.18	7.2	7.24	7.21	7.23	7.17	7.19	7.27	7.27	7.21	7.29	7.22	7.25	7.22	7.25	7.24	7.28	7.24	7.26	7.27	7.22	7.35	7.18	7.19
04.BQghp5olySHSl7o	8.08	7.69	7.45	7.65	8.24	7.37	8.32	8.72	7.44	7.42	8.69	9.32	8.43	8.13	7.8	8.36	8.06	8.27	7.61	7.6	8.11	10.62	9	9.2	10.02	8.43	8.44	10.86	10.15	9.18	8.28	7.97	9.14	8.96	8.1	8.85	9.03	8.47	8.64	9.52	7.63	8.15	7.62	8.59	7.91	8.76	8.35	8.49	8.48
047iTddfNXY5en67ek	8.25	8.57	8	8.2	8.15	8.08	7.91	7.92	8.14	8.58	8.33	8.29	8.27	8.16	8.27	8.46	8.59	8.64	8.68	8.27	8.36	8.61	8.9	8.71	8.49	8.34	8.46	8.25	8.48	8.52	8.52	8.37	8.52	8.48	8.17	8.46	8.27	8.07	8.69	8.24	8.88	8.48	7.81	8.33	8.15	8.99	8.68	8.58	8.47
047MyRElV1lXWt7ZQw	7.55	7.67	7.64	7.78	7.65	7.55	7.55	7.55	7.64	7.69	7.74	7.58	7.56	7.38	7.39	7.82	7.82	7.9	7.72	7.73	7.76	7.75	7.64	7.81	7.67	7.51	7.57	7.48	7.8	7.46	7.42	7.5	7.57	7.42	7.52	7.52	7.63	7.28	7.5	7.53	7.54	7.5	7.6	7.48	7.7	7.69	7.61	7.42	7.49
047Z15XeWq1oJhN0oo	7.38	7.52	7.4	7.47	7.47	7.44	7.28	7.43	7.38	7.5	7.43	7.34	7.34	7.45	7.44	7.39	7.37	7.54	7.41	7.19	7.52	7.33	7.23	7.21	7.26	7.53	7.35	7.51	7.44	7.41	7.56	7.47	7.62	7.38	7.37	7.46	7.34	7.41	7.42	7.43	7.38	7.34	7.41	7.46	7.33	7.4	7.34	7.52	7.34
04AK8u.qpaqKHhZ9MI	7.65	7.83	7.65	7.53	7.84	7.62	7.6	7.64	7.54	7.75	7.65	7.6	7.52	7.94	7.63	7.5	7.5	8.42	7.77	8.06	7.8	7.89	7.68	8.24	7.89	7.89	7.57	7.63	7.82	7.91	7.65	7.85	7.68	7.79	7.55	7.61	7.59	7.75	7.73	7.82	7.99	7.6	7.67	7.63	7.74	7.37	7.83	7.86	7.76
04cKUX5JZ.UqUUKnec	8.48	8.31	8.21	8.43	8.57	8.38	8.22	8.35	8.28	8.05	8.31	8.57	8.36	8.12	8.22	8.09	8.11	8.26	9.05	8.46	8.63	8.47	8.64	8.7	8.61	8.78	8.32	8.68	8.8	8.51	8.61	9.08	9.12	8.74	8.15	8.61	8.14	8.22	8.79	9.09	8.64	8.3	8.15	7.97	8.08	8.43	8.53	8.78	8.56
04FOtKo8iCQSJHnXCk	7.35	7.29	7.38	7.31	7.34	7.43	7.34	7.31	7.28	7.31	7.24	7.2	7.23	7.3	7.44	7.31	7.38	7.2	7.23	7.24	7.24	7.6	7.2	7.31	7.32	7.29	7.32	7.31	7.19	7.41	7.41	7.35	7.29	7.26	7.36	7.3	7.34	7.32	7.42	7.26	7.34	7.36	7.29	7.25	7.16	7.22	7.24	7.33	7.29
04gEeVTXU5XgV4shJU	7.52	7.63	7.67	7.83	8.02	7.47	7.51	7.44	7.92	8.23	8.01	8	7.51	7.62	7.54	7.79	7.88	8.17	7.73	7.82	7.79	7.68	7.7	7.82	7.67	7.8	7.53	7.46	7.76	7.53	7.33	7.36	7.45	7.34	7.75	7.61	7.51	7.58	7.42	7.3	7.34	7.58	7.67	7.79	7.7	7.56	7.89	7.34	7.51
04I6aGCKWJKIr4vmmA	7.31	7.65	7.52	7.25	7.28	7.56	7.75	7.27	7.57	7.64	8.03	7.25	7.45	7.34	7.42	7.48	7.24	7.43	7.62	8.04	8.1	8.58	8.2	8.21	7.96	7.3	7.39	7.42	7.34	7.49	7.42	7.83	7.51	7.47	7.63	7.92	7.28	7.85	7.38	7.63	7.41	7.58	7.36	7.27	7.54	7.51	7.64	7.51	7.43
04iEjiinCogId6oLtU	7.08	7.18	7.17	7.16	7.18	7.17	7.11	7.21	7.19	7.18	7.09	7.15	7.15	7.15	7.15	7.14	7.2	7.24	7.16	7.17	7.18	7.16	7.14	7.14	7.17	7.11	7.12	7.16	7.16	7.19	7.16	7.25	7.11	7.17	7.17	7.18	7.17	7.15	7.13	7.19	7.1	7.14	7.09	7.17	7.15	7.12	7.14	7.12	7.1
04iOXuHv6niqBTyCUI	7.33	7.28	7.37	7.27	7.24	7.28	7.23	7.28	7.32	7.26	7.3	7.19	7.25	7.24	7.23	7.28	7.32	7.25	7.45	7.58	7.61	7.26	7.38	7.63	7.31	7.37	7.25	7.34	7.37	7.28	7.24	7.35	7.37	7.28	7.32	7.34	7.3	7.28	7.39	7.3	7.36	7.31	7.2	7.23	7.21	7.26	7.38	7.36	7.17
04jcQvhWQopUosop5I	8.54	9.03	8.54	8.32	8.36	9.44	8.78	8.37	9.11	9.08	8.17	8.65	9.1	9.24	9.17	8.5	8.23	9.44	9.45	10.22	10.1	9.03	8.71	8.71	8.42	10.04	8.59	8.85	9.26	9.5	9.17	8.81	9.16	9.16	9.27	10.52	8	10.15	9.01	9.03	9.19	8.92	8.55	9.1	8.52	8.59	8.92	9.74	8.59
04jsBagaoKp4qiAoTo	7.45	7.4	7.41	7.44	7.4	7.46	7.4	7.43	7.43	7.29	7.54	7.32	7.35	7.42	7.45	7.39	7.46	7.45	7.58	7.85	7.64	7.84	7.64	7.93	7.78	7.48	7.36	7.57	7.67	7.51	7.57	7.52	7.57	7.53	7.36	7.47	7.37	7.4	7.48	7.52	7.58	7.33	7.39	7.33	7.37	7.55	7.45	7.43	7.32
04kiJKIAUOlS9CS0ro	7.23	7.23	7.18	7.19	7.17	7.15	7.18	7.22	7.15	7.15	7.17	7.24	7.21	7.19	7.19	7.2	7.16	7.18	7.16	7.16	7.21	7.18	7.21	7.18	7.19	7.23	7.19	7.18	7.17	7.13	7.14	7.18	7.15	7.2	7.16	7.14	7.15	7.23	7.21	7.19	7.19	7.28	7.18	7.15	7.16	7.2	7.16	7.17	7.22
04lUBR50q1PXRzCOCU	7.25	7.21	7.2	7.2	7.24	7.21	7.24	7.15	7.27	7.22	7.33	7.23	7.12	7.21	7.2	7.19	7.15	7.33	7.33	7.64	7.47	7.36	7.34	7.41	7.41	7.23	7.16	7.23	7.35	7.23	7.19	7.18	7.17	7.18	7.27	7.44	7.2	7.15	7.26	7.28	7.25	7.16	7.17	7.18	7.15	7.46	7.22	7.23	7.13
04mOpUlYqoY3id5Leg	7.41	7.35	7.41	7.44	7.37	7.38	7.33	7.33	7.45	7.3	7.39	7.3	7.37	7.42	7.35	7.39	7.32	7.36	7.59	7.63	7.39	7.44	7.82	7.72	7.74	7.35	7.36	7.52	7.54	7.47	7.52	7.42	7.43	7.48	7.36	7.33	7.33	7.37	7.34	7.45	7.39	7.34	7.34	7.38	7.34	7.33	7.62	7.45	7.35
04N3oSJ654m7mTVn4k	7.01	7.13	7.15	7.08	7.18	7.08	7.16	7.05	7.16	7.14	7.13	7.16	7.5	7.18	7.16	7.15	7.06	7.19	7.19	7.2	7.19	7.17	7.23	7.19	7.19	7.19	7.16	7.34	7.02	7.17	7.15	7.22	7.21	7.34	7.08	7.2	7.01	7.09	7.24	7.11	7.15	7.14	7.06	7.07	7.08	7.2	7.26	7.15	7.43
04NHKqZ0oRCokdIFFI	7.46	7.39	7.39	7.45	7.4	7.45	7.52	7.4	7.43	7.4	7.5	7.49	7.4	7.45	7.34	7.42	7.4	7.42	7.39	7.23	7.59	7.32	7.3	7.4	7.54	7.39	7.4	7.46	7.37	7.49	7.43	7.39	7.47	7.31	7.42	7.33	7.46	7.42	7.42	7.46	7.54	7.45	7.44	7.4	7.5	7.42	7.52	7.41	7.36
04odP1dbLSl3q3yjDI	7.13	7.1	7.15	7.11	7.21	7.14	7.19	7.13	7.1	7.13	7.18	7.06	7.16	7.15	7.08	7.16	7.14	7.13	7.12	7.16	7.18	7.09	7.11	7.13	7.14	7.07	7.12	7.12	7.15	7.08	7.11	7.15	7.13	7.06	7.17	7.12	7.1	7.09	7.12	7.11	7.1	7.11	7.07	7.19	7.22	7.12	7.12	7.11	7.12
04oqKPOjyn3odOvbjk	7.19	7.14	7.12	7.12	7.15	7.17	7.2	7.16	7.15	7.15	7.15	7.12	7.25	7.12	7.16	7.12	7.14	7.17	7.18	7.17	7.18	7.19	7.13	7.09	7.17	7.09	7.15	7.24	7.16	7.19	7.18	7.11	7.17	7.23	7.19	7.16	7.16	7.16	7.14	7.13	7.2	7.23	7.18	7.12	7.22	7.18	7.17	7.15	7.08
04p6rXpm6_kikiEwhs	7.42	7.36	7.38	7.28	7.35	7.61	7.45	7.41	7.36	7.47	7.37	7.28	7.43	7.36	7.33	7.44	7.45	7.31	7.47	7.2	7.46	7.27	7.23	7.63	7.32	7.34	7.37	7.49	7.27	7.34	7.45	7.53	7.38	7.41	7.56	7.27	7.39	7.45	7.38	7.38	7.41	7.39	7.52	7.36	7.47	7.44	7.34	7.44	7.32
04pjTAEdogXTkQEho0	7.14	7.13	7.14	7.1	7.17	7.2	7.21	7.23	7.21	7.17	7.12	7.1	7.15	7.21	7.11	7.11	7.12	7.11	7.2	7.19	7.2	7.19	7.21	7.25	7.21	7.2	7.18	7.24	7.2	7.23	7.22	7.19	7.24	7.19	7.1	7.2	7.16	7.16	7.09	7.26	7.21	7.2	7.14	7.18	7.23	7.17	7.19	7.23	7.2
04pWmN7vwRtdSuTOOQ	7.2	7.11	7.19	7.13	7.13	7.13	7.14	7.1	7.05	7.09	7.12	7.14	7.05	7.15	7.06	7.15	7.15	7.12	7.19	7.17	7.18	7.2	7.18	7.18	7.2	7.16	7.15	7.06	7.2	7.13	7.17	7.12	7.17	7.09	7.17	7.15	7.13	7.13	7.13	7.13	7.16	7.09	7.13	7.12	7.15	7.17	7.16	7.16	7.21
04qkX6fWXucn_U7Teg	10.01	10.21	10.16	9.92	9.98	9.47	10.18	10.24	10.24	7.86	9.74	10.14	10.38	10.01	10	10.1	9.82	10.37	9.35	9.93	10.4	10.17	10.52	10.18	10.37	10.29	10.08	10.58	9.79	10.27	10.44	8.86	10.45	9.87	10.41	10.19	10.24	10	9.99	9.9	9.97	9.51	10.5	9.48	10.23	10.18	10.14	10.18	10.04
04RHJEN76P9yycSRTo	7.19	7.19	7.22	7.2	7.17	7.24	7.21	7.17	7.17	7.2	7.18	7.13	7.23	7.18	7.17	7.22	7.19	7.21	7.19	7.18	7.22	7.18	7.21	7.18	7.19	7.18	7.13	7.26	7.25	7.25	7.26	7.26	7.16	7.19	7.13	7.29	7.18	7.19	7.19	7.29	7.23	7.15	7.22	7.19	7.12	7.21	7.23	7.23	7.18
04SeRV_BXH97lCVKo4	7.45	7.29	7.59	7.25	7.32	7.42	7.67	7.64	7.46	7.41	7.38	7.28	8.41	7.35	7.37	7.4	7.31	7.46	7.33	7.68	7.55	8.02	7.21	7.27	7.35	7.23	7.34	7.41	7.24	7.44	7.34	7.45	7.28	7.54	7.58	7.65	7.4	7.55	7.38	7.79	7.38	7.65	7.57	7.41	7.82	7.39	7.55	7.47	7.33
04TlFWDp0f0eKOe13g	13.24	12.58	12.82	12.88	12.84	12.04	12.89	13.06	13.13	12.49	12.06	12.09	13.02	12.12	12.57	12.84	12.97	12.95	12.25	12.76	13.74	13.42	13.38	13.53	13.38	11.97	12.73	12.39	13.41	12.88	12.61	12.85	12.64	12.71	12.54	13.01	12.9	12.68	13.12	13.2	12.45	12.24	11.91	12.92	12.22	13.22	12.94	13.16	13.13
04Xve6AUdBd.XSU1_0	7.21	7.18	7.18	7.19	7.17	7.11	7.24	7.13	7.19	7.26	7.14	7.2	7.15	7.23	7.15	7.18	7.14	7.11	7.2	7.17	7.23	7.18	7.19	7.14	7.15	7.2	7.11	7.22	7.16	7.2	7.16	7.24	7.21	7.17	7.23	7.15	7.12	7.26	7.22	7.23	7.2	7.13	7.19	7.15	7.17	7.14	7.16	7.16	7.14
05.5766n_IAEYelqdU	7.21	7.12	7.13	7.15	7.13	7.11	7.06	7.12	7.1	7.14	7.08	7.1	7.11	7.11	7.11	7.16	7.07	7.11	7.16	7.17	7.2	7.15	7.15	7.17	7.17	7.23	7.1	7.15	7.17	7.1	7.16	7.22	7.12	7.09	7.15	7.14	7.12	7.21	7.14	7.11	7.16	7.1	7.17	7.12	7.16	7.15	7.17	7.14	7.08
05.K._ASVaYZdz6d2k	9.91	9.4	11.18	9.36	10.1	9.54	10.19	10	9.5	10.28	9.64	9.02	10.51	10	9.78	9.86	8.8	10.79	9.38	10.3	10.18	9.46	9.73	8.88	9.67	9.92	9.39	9.01	10.01	9.97	9.49	10.32	10.58	9.69	9.41	9.38	9.44	9.84	8.94	10.09	10.03	10.09	9.56	9.53	9.64	8.98	9.66	10.37	9.46
05.sj9U857RQdVJcJU	7.17	7.16	7.21	7.19	7.19	7.17	7.19	7.22	7.11	7.23	7.23	7.17	7.21	7.24	7.12	7.22	7.2	7.19	7.2	7.25	7.21	7.21	7.2	7.2	7.42	7.18	7.17	7.2	7.21	7.21	7.21	7.2	7.2	7.2	7.17	7.24	7.17	7.12	7.18	7.16	7.17	7.22	7.15	7.15	7.11	7.16	7.31	7.17	7.26
050qegOSBeoJR6X7XQ	7.31	7.23	7.32	7.32	7.25	7.37	7.3	7.29	7.29	7.25	7.3	7.27	7.28	7.36	7.36	7.21	7.24	7.21	7.2	7.2	7.23	7.22	7.21	7.36	7.21	7.28	7.37	7.32	7.45	7.3	7.32	7.36	7.29	7.33	7.27	7.26	7.32	7.39	7.19	7.33	7.26	7.3	7.35	7.3	7.26	7.26	7.26	7.4	7.26
051TZyUTd4OR_qCMtU	7.25	7.17	7.21	7.2	7.22	7.24	7.25	7.27	7.2	7.22	7.23	7.23	7.23	7.23	7.26	7.21	7.23	7.25	7.26	7.22	7.22	7.19	7.2	7.17	7.21	7.22	7.19	7.13	7.17	7.25	7.18	7.19	7.19	7.25	7.16	7.2	7.23	7.13	7.24	7.17	7.18	7.23	7.25	7.27	7.18	7.17	7.22	7.26	7.14
053kGeaamk6jBmlOuY	7.21	7.26	7.22	7.33	7.52	8.08	7.25	7.21	7.53	7.23	7.22	7.26	7.43	7.25	7.35	7.27	7.27	7.4	8.13	7.35	7.55	7.26	7.56	7.48	7.51	7.36	7.22	7.29	7.29	7.28	7.22	7.2	7.27	7.29	7.31	7.38	7.21	7.29	7.57	7.25	7.85	7.56	7.17	7.27	7.19	7.22	8.2	7.25	7.34
053TTd3VN_T6K9yTqQ	7.24	7.26	7.22	7.28	7.27	7.33	7.23	7.2	7.21	7.26	7.26	7.3	7.26	7.33	7.29	7.26	7.19	7.21	7.22	7.22	7.22	7.23	7.19	7.18	7.3	7.2	7.18	7.26	7.26	7.19	7.3	7.23	7.2	7.19	7.22	7.22	7.21	7.32	7.24	7.32	7.22	7.21	7.32	7.34	7.27	7.33	7.21	7.25	7.3
054wH1eHoMN0w5zMlE	7.14	7.14	7.16	7.16	7.12	7.1	7.17	7.09	7.09	7.07	7.12	7.04	7.08	7.11	7.16	7.1	7.1	7.1	7.11	7.18	7.18	7.18	7.16	7.18	7.2	7.11	7.05	7.13	7.17	7.14	7.13	7.09	7.12	7.12	7.11	7.17	6.99	7.16	7.14	7.15	7.11	7.17	7.09	7.11	7.08	7.2	7.22	7.13	7.16
055155VOJ7lC7lSp5M	12.01	12.75	12.65	12.25	12.64	13.51	11.71	12.45	11.34	13.69	11.81	12.83	11.52	12.89	12.15	12.07	12.64	11.49	13.09	13.67	11.84	11.48	12.1	13.05	13.9	13.75	13.22	11.44	13.7	12.62	13.3	12.92	12.88	13.54	12.11	12.63	12.57	12.83	12.99	12.51	12.82	12.25	10.42	13.38	11.91	13.56	12.34	13.42	13.27
055eJRRKZRK1RbRIdQ	7.26	7.25	7.25	7.21	7.29	7.31	7.34	7.31	7.28	7.25	7.3	7.36	7.25	7.31	7.28	7.28	7.27	7.28	7.57	7.69	7.51	7.58	7.56	7.86	7.65	7.26	7.43	7.24	7.48	7.31	7.21	7.25	7.26	7.39	7.28	7.39	7.3	7.3	7.32	7.28	7.26	7.32	7.28	7.25	7.33	7.4	7.47	7.27	7.29
055Pcyv_o739f.T63Q	7.14	7.14	7.1	7.08	7.14	7.13	7.15	7.09	7.14	7.18	7.2	7.13	7.12	7.14	7.13	7.13	7.13	7.12	7.15	7.18	7.18	7.18	7.15	7.16	7.15	7.12	7.12	7.13	7.14	7.06	7.09	7.11	7.15	7.16	7.16	7.16	7.15	7.12	7.19	7.12	7.17	7.14	7.08	7.05	7.17	7.1	7.12	7.13	7.13
0573u7l5XqrjtIr7Co	7.6	7.78	7.86	7.96	7.8	7.61	7.71	7.55	7.8	7.76	7.72	7.74	7.81	7.54	7.54	7.71	7.78	7.87	7.84	7.88	7.6	7.65	7.75	7.65	7.77	7.64	7.6	7.62	7.82	7.57	7.46	7.65	7.71	7.57	7.66	7.92	7.66	7.49	7.6	7.61	7.6	7.59	7.68	7.61	7.68	7.72	7.82	7.65	7.52
0576touUtHn_gt7veo	9.51	9.41	9.97	9.19	9	9.02	9.35	9.29	9.14	9.47	10.43	9.21	9.5	9.27	9.29	9.51	11.15	11.01	10.07	9.53	9.86	11.56	10.82	10.15	11.47	9.24	9.45	9.75	9.61	9.73	9.96	9.83	10.34	9.86	9.56	10.07	10.22	9.17	9.86	10.56	9.09	9.55	9.72	10.02	9.85	9.92	9.98	10.01	9.6
057erlKloGKy6U3TFw	9.22	9.27	9.25	9.3	9.54	8.54	9.01	9.54	9.18	8.4	9.38	10.14	9.12	9.45	8.65	9.14	8.95	9.55	8.85	9.29	8.95	9.74	9.61	10.17	10.03	9.14	9.48	9.62	9.81	9.36	9.27	9.88	9.46	9.9	8.98	9.46	9.75	9.54	9.13	9.58	9.57	9.29	9.09	9	9.12	9.07	9.6	9.57	9.33
059InTmbxUY6ThyRIk	7.23	7.23	7.43	7.21	7.27	7.22	7.24	7.28	7.24	7.26	7.19	7.31	7.25	7.35	7.31	7.22	7.27	7.27	7.26	7.32	7.3	7.45	7.42	7.3	7.22	7.29	7.31	7.27	7.36	7.24	7.28	7.32	7.28	7.26	7.24	7.36	7.23	7.25	7.33	7.22	7.28	7.31	7.2	7.28	7.29	7.35	7.28	7.34	7.3
05_ddd1VJX1XW4XFR0	7.51	7.8	7.84	7.92	8.07	7.57	7.68	7.59	7.96	8	8.02	7.93	7.77	7.55	7.52	7.88	8.03	8.17	7.73	7.74	7.55	7.61	7.54	7.46	7.38	7.55	7.63	7.39	8.03	7.39	7.52	7.62	7.47	7.33	7.63	7.75	7.57	7.43	7.55	7.42	7.48	7.62	7.76	7.84	7.65	7.75	7.88	7.44	7.43
05_mmLAELVYpN0kayQ	7.14	7.13	7.11	7.07	7.15	7.11	7.09	7.15	7.11	7.12	7.17	7.13	7.15	7.2	7.15	7.17	7.08	7.18	7.16	7.18	7.19	7.15	7.17	7.16	7.19	7.14	7.1	7.13	7.16	7.13	7.23	7.18	7.17	7.15	7.12	7.1	7.13	7.16	7.21	7.19	7.21	7.15	7.17	7.12	7.19	7.13	7.21	7.21	7.12
05_OqE5VEeSiS5Eie4	7.62	7.45	7.45	7.42	7.44	7.47	7.72	7.6	7.49	7.38	7.51	7.47	7.83	7.29	7.38	7.57	7.6	7.36	7.49	7.59	7.49	8.33	10.01	8.17	8.33	7.63	7.75	7.7	7.5	8.03	7.45	7.55	7.9	7.45	7.73	7.84	8.32	7.89	7.95	7.84	7.51	7.65	7.32	7.45	7.37	7.69	7.58	7.65	7.58
05a52iCJku.5C56Ldc	7.85	7.52	7.67	7.28	7.65	7.47	7.54	7.4	7.43	7.48	7.5	7.49	7.53	7.39	7.52	7.57	7.36	8.17	7.62	7.85	7.7	7.57	8.25	7.32	7.46	7.65	7.47	8.19	7.99	7.75	7.96	8.05	7.64	7.91	7.46	7.47	7.65	7.78	7.68	7.86	7.34	7.56	7.35	7.48	7.39	7.49	7.61	7.67	7.67
05AoeJyqchME6UoQLI	7.46	7.41	7.4	7.44	7.46	7.44	7.39	7.45	7.45	7.33	7.41	7.31	7.34	7.31	7.4	7.3	7.39	7.45	7.52	7.64	7.61	7.53	7.61	7.64	7.42	7.43	7.34	7.63	7.34	7.39	7.5	7.53	7.42	7.41	7.41	7.49	7.42	7.35	7.36	7.47	7.43	7.36	7.34	7.3	7.3	7.36	7.24	7.45	7.38
05At19oFYHkJ4mXlSM	7.13	7.11	7.09	7.09	7.02	7.1	7.15	7.26	7.16	7.14	7.17	7.21	7.42	7.12	7.12	7.1	7.18	7.12	7.13	7.17	7.17	7.19	7.16	7.16	7.16	7.14	7.1	7.14	7.18	7.18	7.1	7.07	7.25	7.13	7.08	7.15	7.13	7.23	7.14	7.14	7.22	7.24	7.13	7.11	7.19	7.2	7.17	7.12	7.2
05AvqnH2vSqi0oKWIs	7.47	7.58	7.49	7.44	7.35	7.49	7.4	7.45	7.47	7.33	7.5	7.33	7.46	7.38	7.44	7.4	7.53	7.42	7.55	7.72	7.53	7.44	7.45	7.74	7.6	7.64	7.4	7.66	7.51	7.46	7.43	7.55	7.53	7.53	7.44	7.55	7.41	7.36	7.45	7.51	7.54	7.44	7.29	7.38	7.35	7.47	7.35	7.49	7.37
05B2nveh3ju7oqOqDI	10.72	9.43	10.82	10.61	10.26	10.1	10.48	10.01	9.71	10.94	10.32	8.99	10.2	10.09	10.58	10.11	9.15	10.86	9.6	10.15	9.89	9.53	8.69	10.17	10.08	9.86	9.94	9.47	10.31	10.22	9.81	9.43	9.73	10.9	9.32	10	9.5	10.33	10.31	10.53	9.81	10.57	10.88	9.55	10.31	9.29	9.72	9.83	9.29
05bPfrt6JLl4Xumrnw	7.23	7.18	7.2	7.18	7.24	7.19	7.16	7.24	7.2	7.17	7.23	7.26	7.22	7.14	7.2	7.2	7.21	7.3	7.22	7.18	7.22	7.19	7.18	7.16	7.18	7.2	7.23	7.23	7.17	7.19	7.21	7.19	7.2	7.26	7.22	7.18	7.32	7.21	7.18	7.21	7.18	7.24	7.13	7.19	7.19	7.21	7.18	7.24	7.28
05cAenH3qh3ynnulCE	7.21	7.26	7.25	7.25	7.26	7.33	7.27	7.23	7.33	7.18	7.26	7.26	7.29	7.36	7.22	7.29	7.29	7.3	7.21	7.25	7.22	7.21	7.21	7.18	7.21	7.25	7.26	7.27	7.22	7.26	7.28	7.27	7.32	7.27	7.33	7.2	7.3	7.2	7.28	7.21	7.25	7.24	7.15	7.23	7.15	7.22	7.2	7.25	7.23
05cVJHFUBVS9QFYh9I	7.24	7.2	7.24	7.22	7.21	7.23	7.29	7.17	7.25	7.25	7.26	7.24	7.18	7.25	7.19	7.27	7.23	7.22	7.37	7.34	7.27	7.43	7.26	7.31	7.39	7.22	7.3	7.19	7.27	7.21	7.19	7.2	7.16	7.23	7.26	7.43	7.24	7.27	7.21	7.24	7.27	7.18	7.25	7.27	7.21	7.37	7.56	7.16	7.22
05dUFJL1JU0fnSoVXA	7.18	7.17	7.19	7.32	7.19	7.2	7.18	7.19	7.15	7.23	7.17	7.25	7.11	7.21	7.21	7.18	7.18	7.23	7.23	7.16	7.2	7.19	7.17	7.16	7.16	7.22	7.22	7.14	7.2	7.1	7.14	7.16	7.15	7.07	7.13	7.22	7.23	7.1	7.15	7.1	7.14	7.19	7.37	7.13	7.29	7.22	7.24	7.15	7.15
05E9zsVdY.uCXEoDeo	7.25	7.31	7.24	7.22	7.29	7.6	10.28	7.27	7.22	7.21	7.21	7.54	7.23	7.37	7.27	7.32	9.48	7.23	7.25	7.25	7.22	7.18	7.16	8.04	7.19	7.22	7.23	7.46	7.64	7.39	7.17	7.21	7.25	7.6	7.79	7.54	7.22	7.25	7.22	7.38	7.61	8.69	9.04	7.39	7.28	9.12	7.2	9.39	7.29
05ESosClC4qRKiCkqk	7.47	7.4	7.45	7.56	7.48	7.55	7.56	7.51	7.53	7.55	7.52	7.39	7.57	7.58	7.47	7.45	7.53	7.53	7.46	7.31	7.45	7.52	7.3	7.43	7.49	7.49	7.54	7.6	7.28	7.56	7.56	7.42	7.47	7.66	7.5	7.42	7.49	7.52	7.5	7.56	7.59	7.47	7.43	7.43	7.56	7.45	7.54	7.45	7.46
05f7OpNNfM_3kKJHSg	7.22	7.14	7.14	7.23	7.21	7.25	7.2	7.19	7.24	7.18	7.25	7.26	7.22	7.23	7.24	7.19	7.17	7.16	7.26	7.22	7.2	7.21	7.2	7.2	7.25	7.21	7.25	7.23	7.22	7.2	7.19	7.2	7.17	7.22	7.18	7.25	7.18	7.24	7.25	7.21	7.2	7.23	7.24	7.17	7.2	7.31	7.31	7.25	7.17
05FXV3qNJIcSm7Xa7Q	9.67	8.68	8.83	8.97	9.21	8.26	9.49	8.82	8.54	8.47	8.96	8.68	9.56	8.57	8.49	9.7	9.16	8.16	7.78	8.36	7.99	7.83	9.28	8.53	8.43	8.93	8.96	8.94	8.65	9.01	9.27	9.1	8.72	8.05	8.99	8.11	10.37	8.27	8.68	8.87	8.5	8.96	8.77	8.64	8.03	8.09	7.84	8.95	9.13
05GRvqiC2lfqN.d_LQ	11.06	11.26	11.35	11.19	11.46	10.92	10.43	10.94	10.93	10.87	11.24	11.89	10.63	10.85	11.13	10.86	10.76	11.37	11.25	11.22	10.68	11.48	11.2	11.61	11.72	11.05	10.94	10.83	11.19	10.62	10.93	11.14	10.7	11.42	10.53	10.33	10.9	10.3	10.11	11.45	10.29	11.41	10.61	10.16	11.19	11.19	10.68	10.61	10.54
05HAkgRgfJ_lz3Ky9Q	8.59	8.85	9.85	9.6	8.93	9.17	8.2	8.7	9.74	10.2	9	8.84	8.67	9.38	9.29	9.37	9.51	9.14	7.52	7.19	7.22	7.26	7.19	7.17	7.17	8.36	9.72	7.99	7.48	7.58	7.83	8.02	8.02	7.89	9.3	7.19	9.43	8.54	7.57	7.46	7.93	9.11	10.16	10.01	9.89	7.32	7.48	7.64	8.57
05II_KL2aI66JqKCKE	7.42	7.29	7.3	7.31	7.72	7.43	7.28	7.52	7.75	7.37	7.54	7.59	7.42	7.38	7.42	7.4	7.25	7.39	7.64	7.52	7.6	7.6	7.39	7.45	7.46	7.38	7.38	7.43	7.76	7.52	7.31	7.79	7.5	7.4	7.43	7.62	7.33	7.65	7.34	7.43	7.76	7.5	7.55	7.31	7.46	7.49	7.77	7.55	7.37
05IpKH6g3gOIUlqJ7g	7.18	7.14	7.15	7.1	7.16	7.19	7.22	7.15	7.18	7.09	7.2	7.16	7.17	7.21	7.13	7.14	7.19	7.13	7.16	7.17	7.17	7.14	7.14	7.14	7.15	7.2	7.19	7.13	7.12	7.17	7.24	7.18	7.17	7.19	7.15	7.14	7.16	7.19	7.22	7.2	7.19	7.2	7.15	7.18	7.21	7.12	7.14	7.2	7.23
05J7B50ZQDp46op558	10.4	10.45	10.53	10.28	10.41	10.06	10.69	10.03	10.43	11.09	10.39	10.61	10.21	10.41	11	9.97	10.69	10.12	10.53	10.61	10.4	11.03	11.01	11.33	10.74	10.9	10.42	11.82	10.99	11.02	11.36	11.32	11.45	10.88	10.55	11.19	10.33	10.9	11.34	10.83	11.12	9.94	10.46	9.97	9.73	11.04	11.14	10.51	10.98
05JEVRJQsimAkunTXE	7.27	7.28	7.27	7.26	7.36	7.21	7.23	7.39	7.29	7.19	7.23	7.23	7.23	7.33	7.25	7.23	7.23	7.56	7.22	7.24	7.21	7.3	7.24	7.18	7.33	7.25	7.28	7.32	7.25	7.26	7.24	7.24	7.28	7.3	7.27	7.25	7.34	7.38	7.29	7.29	7.3	7.25	7.24	7.26	7.24	7.25	7.31	7.27	7.35
05JHq_iIqRqL636e9M	7.24	7.22	7.15	7.19	7.2	7.22	7.2	7.2	7.22	7.24	7.3	7.34	7.25	7.27	7.23	7.24	7.22	7.27	7.25	7.22	7.21	7.19	7.17	7.2	7.19	7.22	7.16	7.19	7.21	7.19	7.24	7.2	7.21	7.36	7.26	7.17	7.24	7.2	7.33	7.25	7.22	7.22	7.25	7.21	7.19	7.23	7.19	7.24	7.22
05JpiTQEKSffpt6l7g	7.18	7.21	7.15	7.18	7.18	7.18	7.15	7.18	7.21	7.13	7.22	7.13	7.18	7.24	7.2	7.15	7.17	7.17	7.2	7.16	7.19	7.17	7.17	7.15	7.18	7.16	7.17	7.21	7.15	7.24	7.19	7.16	7.15	7.19	7.18	7.16	7.18	7.18	7.19	7.19	7.21	7.25	7.16	7.15	7.12	7.1	7.16	7.22	7.25
05JQIK41IUvtAo4Hgk	7.22	7.17	7.16	7.18	7.21	7.21	7.18	7.22	7.21	7.27	7.23	7.25	7.18	7.19	7.13	7.21	7.22	7.17	7.18	7.18	7.2	7.14	7.17	7.14	7.16	7.21	7.25	7.16	7.16	7.16	7.2	7.22	7.2	7.16	7.19	7.23	7.24	7.21	7.19	7.19	7.25	7.18	7.25	7.25	7.18	7.18	7.14	7.24	7.28
05JSEoAeI67iSAqego	7.2	7.27	7.26	7.25	7.28	7.28	7.23	7.34	7.23	7.22	7.24	7.3	7.22	7.21	7.21	7.24	7.25	7.19	7.21	7.22	7.27	7.22	7.25	7.19	7.2	7.24	7.22	7.25	7.22	7.24	7.22	7.27	7.18	7.21	7.31	7.21	7.32	7.3	7.24	7.28	7.23	7.26	7.29	7.22	7.29	7.19	7.21	7.27	7.3
05JVA0ZYNewdJG9KfM	7.13	7.15	7.59	7.15	7.22	7.18	7.16	7.16	7.21	8.43	7.39	7.25	7.27	7.18	7.27	7.22	7.2	7.25	7.38	7.22	7.27	7.29	8.14	7.18	7.2	7.39	7.31	7.41	7.37	7.23	7.16	7.2	7.18	7.23	8.28	7.25	7.23	7.2	7.22	7.2	7.17	7.2	7.24	7.23	7.22	7.26	7.35	7.23	7.2
05KENUlBBK6JIJFNkU	7.33	7.35	7.33	7.37	7.33	7.39	7.42	7.26	7.36	7.36	7.33	7.32	7.3	7.38	7.37	7.32	7.37	7.29	7.3	7.48	7.56	7.42	7.43	7.67	7.34	7.36	7.36	7.47	7.32	7.33	7.49	7.37	7.39	7.42	7.35	7.37	7.35	7.41	7.39	7.44	7.41	7.35	7.34	7.39	7.34	7.4	7.26	7.38	7.37
05knr04HPp5NefK5UU	9.53	9.32	9.52	9.75	9.44	10.68	9.72	10.22	9.93	10.27	9.92	9.03	10.36	9.97	8.93	9.61	10.24	8.96	10.95	9.85	10.29	9.56	9.31	9.11	9.27	10.2	9.14	9.51	9.52	9.94	10.11	9.07	10.17	9.77	8.99	9.28	8.82	9.86	9.69	9.84	9.33	8.85	9.84	9.12	10.04	9.72	9.91	9.62	9.76
05kvUcEUpRFeWhB1J4	7.4	7.3	7.3	7.26	7.3	7.3	7.31	7.32	7.25	7.43	7.26	7.34	7.32	7.35	7.27	7.29	7.35	7.28	7.39	7.54	7.28	7.3	7.27	7.21	7.23	7.29	7.2	7.31	7.2	7.39	7.2	7.31	7.23	7.27	7.25	7.22	7.22	7.23	7.3	7.24	7.32	7.3	7.33	7.34	7.4	7.24	7.56	7.26	7.37
05l456hJVnVI7AgZh8	12.38	12.64	12.9	12.75	12.41	13.24	11.71	12.72	11.26	13.89	12.24	13.12	11.88	12.25	12.37	12.58	12.67	12.23	13.05	13.72	12.07	12.06	12.66	13.22	14.47	13.64	13.37	11.72	13.8	12.77	13.57	12.96	13.23	13.54	12.31	12.74	12.98	13.3	13.17	12.14	12.85	12.44	10.73	13.78	11.94	13.7	11.56	13.74	13.44
05L59LFTDs9_t1XEkg	7.43	8.05	7.68	7.65	7.5	8.06	7.71	7.87	8.39	8.31	8.79	7.43	8.09	7.57	8.14	7.97	7.35	7.56	8.38	8.4	8.55	7.59	7.93	7.8	7.74	7.92	7.95	7.7	7.65	7.98	8.07	7.93	8.22	7.73	8.55	7.88	7.42	8.13	7.8	7.55	7.73	7.84	7.82	8.24	8.07	7.85	7.61	7.98	7.4
05LL00qlsTn7luJhpQ	7.4	7.31	7.36	7.3	7.32	7.56	7.34	7.34	7.35	7.28	7.25	7.29	7.32	7.25	7.36	7.31	7.32	7.36	7.36	7.67	7.39	7.38	7.38	7.47	7.4	7.45	7.33	7.36	7.26	7.44	7.3	7.34	7.37	7.38	7.31	7.28	7.35	7.33	7.28	7.45	7.31	7.34	7.34	7.27	7.25	7.34	7.41	7.32	7.29
05LQOoq1K7W76KnqN8	10.86	11.92	10.45	10.23	10.07	10.73	10.16	10.53	10.56	10.41	11.53	10.7	10.52	10.04	11.39	10.44	10.16	10.22	11.79	11.6	11.01	11.9	11.51	11.79	11.51	11.02	11.15	11.45	11.54	11.3	11.68	11.81	11.5	11.93	10.72	11.53	10.89	11.08	11.35	11.84	11.8	10.74	9.76	10.19	10.81	11.7	11.57	11.11	11.01
05N2qIiE9Jcw4OgApU	7.38	7.36	7.35	7.37	7.33	7.32	7.33	7.24	7.3	7.26	7.35	7.37	7.29	7.34	7.27	7.3	7.31	7.27	7.31	7.56	7.35	7.59	7.36	7.81	7.56	7.33	7.43	7.36	7.4	7.39	7.29	7.37	7.32	7.35	7.37	7.47	7.39	7.29	7.33	7.39	7.25	7.32	7.4	7.36	7.41	7.28	7.42	7.35	7.28
05N5KlT1KnpIiek.Hc	7.21	7.18	7.2	7.22	7.2	7.21	7.2	7.2	7.18	7.13	7.16	7.19	7.14	7.21	7.27	7.16	7.18	7.2	7.15	7.17	7.24	7.2	7.16	7.18	7.22	7.22	7.18	7.22	7.18	7.21	7.25	7.17	7.17	7.2	7.12	7.16	7.19	7.21	7.15	7.24	7.2	7.16	7.13	7.14	7.25	7.22	7.18	7.18	7.26
05P_F70u3t9SRruxH0	9.12	10	9.14	9	9.4	8.94	9.27	8.58	9.97	8.93	10.2	9.57	9.24	10.33	9.51	9.85	8.79	10.18	8.95	9.55	9.41	8.76	9.56	8.86	8.46	9.68	9.71	10.18	9.67	9.15	10.06	8.68	9.34	9.6	9.49	9.31	8.9	10.12	9.04	9.08	9.23	8.75	9.87	9.83	10.35	9.41	10.31	8.82	9.14
05QqyquERKosoAJeJs	7.38	7.34	7.38	7.28	7.3	7.31	7.31	7.36	7.37	7.31	7.33	7.23	7.43	7.22	7.36	7.29	7.34	7.29	7.22	7.18	7.35	7.23	7.22	7.18	7.2	7.4	7.33	7.47	7.21	7.42	7.54	7.37	7.49	7.35	7.37	7.32	7.35	7.35	7.35	7.55	7.44	7.33	7.15	7.26	7.27	7.24	7.21	7.4	7.33
05QTLU5TXgjGRZ46ik	7.2	7.19	7.15	7.23	7.23	7.24	7.18	7.23	7.23	7.27	7.24	7.24	7.25	7.19	7.16	7.28	7.21	7.31	7.31	7.2	7.24	7.2	7.2	7.17	7.21	7.19	7.21	7.19	7.4	7.15	7.16	7.16	7.25	7.23	7.23	7.22	7.27	7.12	7.17	7.15	7.2	7.24	7.31	7.31	7.31	7.44	7.29	7.21	7.2
05RSFBFVIfVRfSUU0g	7.26	7.24	7.31	7.26	7.33	7.21	7.31	7.21	7.29	7.3	7.33	7.34	7.25	7.31	7.25	7.29	7.31	7.4	7.23	7.19	7.23	7.24	7.19	7.2	7.2	7.22	7.31	7.21	7.2	7.28	7.28	7.24	7.22	7.25	7.32	7.2	7.28	7.26	7.29	7.2	7.28	7.23	7.35	7.35	7.3	7.22	7.52	7.32	7.18
05RUOzJQPsbnwAEuWI	7.79	7.6	8.86	8.26	9.61	7.29	8.63	7.29	8.27	10.23	7.81	8.28	8.51	7.93	8.22	9.79	8.05	8.22	7.19	7.19	7.24	7.2	7.22	7.18	7.21	7.25	7.46	7.24	7.24	7.3	7.17	7.24	7.22	7.18	7.72	7.18	7.32	7.7	7.17	7.26	7.23	9.68	10.56	7.51	9.78	7.21	7.23	7.19	7.36
05Tpl.rWQjP30Rn1QE	7.57	7.29	7.4	7.42	7.77	7.45	7.64	7.4	7.61	7.64	7.39	7.44	7.69	7.86	7.85	7.48	7.47	7.44	8.13	8.29	7.85	7.59	7.45	7.53	7.31	7.31	7.67	7.69	7.33	7.39	7.81	8.17	8.03	7.8	7.62	7.58	7.46	7.96	8	7.75	8.25	7.57	8.05	7.91	7.57	7.8	7.56	7.69	7.5
05UqSufN4XwS53TTro	7.78	7.72	8.32	8.55	7.93	7.53	8.38	8.37	7.79	7.45	7.98	8.72	8.15	8.29	8.76	8.24	8.33	7.86	7.95	7.77	8.21	9.47	8.3	8.72	9.55	8.3	8.47	7.6	8.82	8.62	7.79	7.73	8.35	8.66	8.11	8.77	9.24	8.41	9.11	8.77	7.96	8.2	8.21	8.39	7.62	8.5	8.05	8.24	8.65
05Vg0irqhQGMTpV4LE	7.34	7.32	7.4	7.27	7.33	7.35	7.37	7.31	7.35	7.29	7.38	7.3	7.33	7.34	7.32	7.3	7.36	7.3	7.35	7.42	7.42	7.2	7.34	7.22	7.21	7.43	7.33	7.44	7.23	7.42	7.26	7.34	7.43	7.39	7.28	7.38	7.3	7.29	7.29	7.32	7.36	7.23	7.28	7.29	7.31	7.32	7.36	7.32	7.34
05VLSnQle6_ygwJe40	10.9	10.48	10.06	10.55	10	10.53	11.48	10.1	9.84	9.56	9.95	10.58	10.04	9.49	9.89	10.63	10.33	11.6	10.58	10.32	10.33	11.27	10.6	10.59	10.95	10.62	10.12	10.35	10.98	10.4	10.3	9.88	10.17	10.61	10.15	10.29	10.56	9.82	10.6	9.95	10.3	9.98	9.37	10.45	9.84	10.56	10.41	10.82	10.67
05Vyh979FIkoNC64pE	7.24	7.32	7.35	7.35	7.36	7.35	7.42	7.37	7.34	7.28	7.33	7.35	7.43	7.31	7.28	7.35	7.35	7.26	7.36	7.29	7.33	7.53	7.59	7.51	7.48	7.39	7.32	7.41	7.34	7.35	7.33	7.36	7.43	7.4	7.35	7.28	7.4	7.41	7.36	7.45	7.33	7.31	7.33	7.38	7.35	7.28	7.34	7.39	7.48
05X437X.zovBqighV0	7.68	7.75	7.86	8.2	7.8	7.91	7.79	7.62	8.02	7.61	7.78	8	7.63	7.77	8.23	7.7	7.86	7.98	8.23	7.43	7.68	7.85	7.73	7.57	7.75	7.45	7.73	7.75	7.92	7.61	7.89	7.58	7.75	8.06	7.79	7.96	7.72	7.86	7.75	7.93	7.79	7.59	7.67	7.61	8.19	8.11	8.08	7.63	7.76
05yB5TSXqFeBB7OAUo	7.23	7.21	7.19	7.28	7.17	7.18	7.26	7.21	7.17	7.22	7.2	7.28	7.23	7.27	7.24	7.23	7.21	7.28	7.21	7.35	7.26	7.25	7.22	7.35	7.22	7.23	7.32	7.24	7.27	7.29	7.23	7.28	7.19	7.24	7.23	7.27	7.24	7.28	7.31	7.27	7.2	7.22	7.25	7.25	7.17	7.31	7.31	7.22	7.3
05zrV1ktKVU_XqeSUg	7.24	7.19	7.25	7.41	7.3	7.47	7.42	7.33	7.3	7.19	7.28	7.23	7.23	7.33	7.32	7.32	7.41	7.26	7.33	7.59	7.46	7.59	7.36	7.77	7.6	7.22	7.33	7.35	7.45	7.36	7.32	7.38	7.35	7.4	7.22	7.5	7.35	7.27	7.41	7.51	7.28	7.26	7.34	7.29	7.32	7.3	7.44	7.35	7.36
05ZZTFZ4KK6C1Wy6AE	7.3	7.28	7.27	7.21	7.28	7.29	7.2	7.21	7.28	7.28	7.32	7.32	7.31	7.18	7.25	7.24	7.26	7.33	7.2	7.41	7.29	7.28	7.38	7.57	7.3	7.26	7.27	7.23	7.32	7.28	7.24	7.24	7.22	7.38	7.23	7.27	7.26	7.18	7.2	7.29	7.28	7.25	7.2	7.18	7.22	7.34	7.3	7.27	7.25
060ohNEhKdX3Vl9PSo	7.33	7.44	7.6	7.62	7.57	7.34	7.31	7.39	7.53	7.5	7.43	7.55	7.31	7.4	7.37	7.44	7.44	7.55	7.43	7.19	7.3	7.23	7.21	7.19	7.24	7.35	7.31	7.27	7.64	7.28	7.32	7.2	7.27	7.13	7.32	7.32	7.33	7.25	7.27	7.33	7.34	7.31	7.47	7.65	7.37	7.42	7.54	7.26	7.22
060yBcglAJREgqQg1Q	7.46	7.93	7.55	7.74	7.94	7.52	7.72	7.67	8.05	7.99	8.33	8.55	7.85	8.67	8.03	8.57	8.1	7.3	7.24	7.22	7.25	7.21	7.34	7.22	7.22	7.39	8.47	7.25	7.46	7.28	7.17	7.3	7.23	7.34	8.07	7.26	9.08	7.59	7.3	7.25	7.31	8.07	8.42	8.23	7.57	7.31	7.49	7.26	7.55
0644r3stUjHQiniuoo	8.1	8.02	8.33	8.17	8.08	7.97	8.23	7.85	8.12	8.48	8.72	8.07	8.17	8.01	7.97	8.55	8.25	8.81	7.97	8.18	7.96	8.25	8.18	8.34	8.17	7.94	8.15	8.11	8.09	7.94	8.04	7.87	8.17	8.17	8.2	8.21	7.96	7.88	7.97	8.02	7.94	8.08	8.67	8.14	8.39	8	8.24	7.99	7.77
064DPoPet764_t9N.0	7.29	7.36	7.29	7.46	7.32	7.3	7.36	7.48	7.34	7.65	7.29	7.41	7.42	7.31	7.55	7.43	7.51	7.34	7.43	7.28	7.29	7.29	7.25	7.27	7.45	7.26	7.55	7.29	7.27	7.18	7.18	7.2	7.26	7.37	7.72	7.32	7.49	7.39	7.29	7.2	7.12	7.36	7.41	7.93	7.43	7.29	7.3	7.23	7.53
064yRyRe6jkS9a7SSo	7.61	7.68	7.48	7.4	7.65	7.74	7.53	7.58	7.61	7.53	7.49	7.5	7.72	7.5	7.57	7.46	7.69	7.47	8.03	8.09	7.66	7.71	8.48	7.68	7.76	7.88	7.63	7.88	7.72	8.07	7.83	7.64	7.64	7.56	7.86	8.08	7.63	7.84	7.84	7.6	7.71	7.63	7.59	7.6	7.39	8.04	7.72	7.41	7.59
0654B0iQS9IrpsDelE	7.15	7.15	7.26	7.13	7.2	7.16	7.2	7.06	7.14	7.14	7.18	7.19	7.17	7.1	7.2	7.13	7.15	7.18	7.26	7.18	7.19	7.17	7.17	7.18	7.17	7.15	7.2	7.2	7.18	7.15	7.13	7.19	7.18	7.16	7.13	7.17	7.11	7.14	7.14	7.12	7.16	7.23	7.71	7.2	7.23	7.17	7.25	7.15	7.11
06636J_Iu_O0.ru6oU	7.45	7.32	7.42	7.32	7.29	7.45	7.42	7.43	7.35	7.52	7.19	7.36	7.32	7.37	7.29	7.42	7.46	7.34	7.3	7.29	7.21	7.37	7.31	7.18	7.3	7.29	7.34	7.34	7.44	7.32	7.26	7.36	7.29	7.29	7.46	7.47	7.45	7.35	7.36	7.22	7.25	7.39	7.43	7.33	7.53	7.47	7.32	7.34	7.28
067qL7Tinu_C4fNzuo	10.99	10.95	11.55	11.65	11.42	11.6	11.27	11.53	11.42	11.36	11.65	11.18	11.63	11.56	11.5	11.49	11.44	11.76	10.98	10.36	10.85	11.45	10.94	10.99	11.12	10.4	11.7	10.12	10.93	10.62	10.81	10.68	11.23	11.25	11.39	10.92	11.46	10.85	10.88	10.69	10.65	11.37	11.38	12.09	11.94	10.84	11.04	10.79	10.89
0680qn5LuKjugPK0Ao	7.38	7.3	7.33	7.32	7.34	7.43	7.28	7.45	7.32	7.42	7.39	7.26	7.37	7.37	7.37	7.37	7.37	7.44	7.4	7.38	7.34	7.23	7.38	7.18	7.38	7.3	7.41	7.26	7.34	7.34	7.37	7.32	7.3	7.4	7.4	7.35	7.42	7.33	7.33	7.29	7.36	7.38	7.24	7.41	7.41	7.35	7.3	7.36	7.23
069Tu614zr_QQ.wU_U	7.14	7.18	7.18	7.15	7.16	7.2	7.21	7.11	7.2	7.18	7.19	7.23	7.16	7.24	7.25	7.18	7.15	7.18	7.18	7.18	7.2	7.15	7.21	7.17	7.19	7.18	7.14	7.21	7.29	7.23	7.15	7.2	7.21	7.13	7.16	7.2	7.17	7.22	7.16	7.22	7.12	7.16	7.27	7.13	7.13	7.21	7.22	7.18	7.19
06_iR6LqJ4JBcNeH5I	7.2	7.13	7.09	7.12	7.19	7.19	7.17	7.2	7.17	7.17	7.19	7.16	7.14	7.23	7.15	7.14	7.16	7.13	7.19	7.2	7.21	7.2	7.19	7.13	7.18	7.13	7.12	7.16	7.19	7.13	7.16	7.16	7.21	7.1	7.14	7.19	7.18	7.15	7.21	7.16	7.16	7.16	7.14	7.16	7.09	7.18	7.19	7.13	7.17
06BH0VST9VK77_gR40	7.64	7.45	7.7	7.84	7.36	7.35	7.59	7.41	7.6	7.66	7.36	7.37	7.73	7.56	7.59	7.76	7.53	7.91	7.24	7.53	8.04	8.37	7.31	7.93	7.58	7.32	7.78	7.36	7.79	7.53	7.39	7.69	7.52	7.98	7.91	8.44	7.48	7.87	8.03	7.95	7.55	7.67	7.91	7.28	8.2	7.88	8.07	7.38	7.51
06C3XUpAvggHOCulfg	7.16	7.07	7.1	7.07	7.07	7.13	7.06	7.11	7.1	7.02	7.1	7.1	7.1	7.07	7.02	7.06	7.08	7.1	7.2	7.16	7.17	7.12	7.16	7.14	7.15	7.03	7.12	7.13	7.14	7.01	7.1	7.1	7.08	7.08	7.07	7.16	7.06	7.06	7.08	7.1	7.14	7.04	7.09	7.06	7.13	7.1	7.13	7.1	7.05
06ctvVfjvlCiSOziuk	7.35	7.34	7.32	7.28	7.35	7.58	7.58	7.66	7.39	7.26	7.25	7.29	7.5	7.23	7.44	7.23	7.49	7.3	7.4	7.2	7.43	7.7	7.72	7.55	7.99	7.35	7.37	7.36	7.23	7.46	7.39	7.28	7.39	7.3	7.3	7.33	7.35	7.38	7.31	7.46	7.42	7.29	7.25	7.26	7.2	7.21	7.3	7.32	7.35
06CXt5.F7LUuF.3l5U	9.41	9.08	8.87	8.86	9.05	8.63	8.53	7.81	9.26	7.94	8.05	8.37	8.84	7.84	9.78	8.11	8.8	8.33	8.58	8.4	10.39	8.14	7.38	8.1	7.5	8.01	8.2	8.27	8.94	8.83	7.88	7.33	7.84	9.34	8.28	8.68	7.98	8.51	8.77	9.2	8.94	8.53	8.23	8.26	9.02	8.68	10.36	7.6	8.34
06eQTq_6xV_unvefo8	7.11	7.16	7.14	7.13	7.13	7.16	7.17	7.16	7.1	7.13	7.14	7.14	7.18	7.14	7.13	7.09	7.18	7.15	7.21	7.22	7.23	7.18	7.2	7.18	7.19	7.16	7.19	7.18	7.26	7.07	7.14	7.21	7.14	7.12	7.08	7.21	7.13	7.12	7.13	7.18	7.11	7.17	7.14	7.14	7.17	7.18	7.23	7.11	7.09
06FGRlSFUSWAdAEUKA	7.36	7.32	7.22	7.32	7.3	7.42	7.32	7.37	7.35	7.38	7.43	7.53	7.27	7.41	7.35	7.4	7.36	7.46	7.49	7.33	7.41	7.44	7.26	7.85	7.28	7.34	7.47	7.29	7.29	7.29	7.35	7.33	7.37	7.32	7.38	7.37	7.45	7.35	7.32	7.32	7.36	7.38	7.44	7.34	7.37	7.37	7.46	7.3	7.36
06FxShiieqJ9dE3eeA	9.68	9.12	8.77	9.5	9.09	9.61	8.59	9.19	8.85	9.32	9.31	9.49	9.27	9.48	8.71	9.12	8.81	10.01	9.73	9.33	9.45	9.18	8.86	9.21	8.75	9.51	8.51	9.24	8.96	9.25	9.26	9.2	9.11	8.8	8.65	9.65	8.77	8.87	9.84	9.03	9.33	8.78	9.09	8.78	9.17	8.96	9.41	9.28	9.08
06gcIjUfl3t1Iu7nFE	7.07	7.13	7.17	7.21	7.13	7.17	7.11	7.24	7.1	7.16	7.08	7.02	7.17	7.16	7.09	7.15	7.08	7.1	7.16	7.17	7.17	7.17	7.14	7.18	7.19	7.1	7.16	7.18	7.18	7.14	7.14	7.06	7.15	7.1	7.09	7.15	7.1	7.14	7.11	7.13	7.05	7.02	7.13	7.14	7.01	7.17	7.15	7.07	7.11
06gqvnKq6oacFKsIO8	7.45	7.45	7.42	7.33	7.34	7.36	7.37	7.35	7.4	7.42	7.49	7.31	7.42	7.35	7.4	7.31	7.36	7.46	7.68	7.43	7.46	7.41	7.71	7.62	7.76	7.45	7.35	7.51	7.53	7.49	7.52	7.57	7.43	7.48	7.34	7.31	7.33	7.36	7.4	7.64	7.43	7.41	7.35	7.3	7.33	7.39	7.39	7.4	7.37
06i3SOgoQuOqNKVSJ8	8.12	7.98	7.89	7.61	7.57	7.68	7.82	7.71	7.66	7.46	7.43	7.75	7.92	7.57	7.66	7.9	7.62	7.96	7.57	7.76	7.7	7.92	7.75	7.75	7.99	7.45	7.48	7.59	7.36	7.57	7.45	7.47	7.5	7.42	7.47	7.59	7.57	7.53	7.5	7.49	7.74	7.41	7.39	7.44	7.93	7.52	7.57	7.61	7.65
06ikdJAl4AHeq3ydeo	7.35	7.31	7.34	7.37	7.31	7.35	7.32	7.39	7.3	7.27	7.27	7.21	7.22	7.35	7.34	7.3	7.35	7.33	7.29	7.26	7.3	7.26	7.2	7.28	7.2	7.38	7.32	7.28	7.4	7.3	7.22	7.22	7.31	7.28	7.29	7.42	7.31	7.2	7.3	7.25	7.29	7.32	7.3	7.32	7.21	7.24	7.3	7.27	7.3
06IX0HVTfzZ1UqHdmQ	7.8	7.73	7.57	8.02	7.66	7.54	7.58	7.46	7.31	7.29	7.33	7.59	7.52	7.78	7.33	7.58	7.48	7.46	7.37	7.5	7.62	7.25	7.81	7.49	7.35	7.97	7.42	7.79	8.16	7.6	7.71	8.17	7.26	7.35	7.4	7.45	7.49	7.57	7.59	7.38	7.44	7.48	7.41	7.33	7.6	7.93	7.71	7.51	7.84
06JSKDM6wRXiujgOWo	7.61	7.43	7.55	7.53	7.44	7.48	7.56	7.48	7.46	7.6	7.3	7.36	7.52	7.55	7.45	7.61	7.44	7.56	7.6	7.22	7.28	7.33	7.33	7.22	7.42	7.32	7.63	7.43	7.4	7.36	7.34	7.29	7.41	7.49	7.58	7.53	7.41	7.49	7.8	7.42	7.41	7.47	7.63	7.62	7.47	7.45	7.57	7.33	7.34
06jt6JSj760.h05fgk	10.41	10.93	10.54	10.95	11.31	11.59	11.2	10.73	10.9	10.85	11.5	11.08	10.76	12.01	11.87	10.74	10.79	9.71	11.14	11.4	10.87	10.29	10.99	11.1	10.57	11.77	10.6	11.44	10.63	10.75	11.2	10.68	11.77	10.49	10.79	10.44	10.66	10.9	10.72	10.34	11.25	10.79	10.75	10.76	10.7	11.45	11.34	10.96	11.05
06K6JC5Wid2lNO5g78	7.2	7.14	7.18	7.13	7.14	7.16	7.14	7.18	7.18	7.15	7.19	7.25	7.23	7.15	7.14	7.18	7.17	7.21	7.16	7.19	7.22	7.19	7.19	7.18	7.18	7.18	7.12	7.22	7.19	7.22	7.11	7.13	7.17	7.15	7.18	7.2	7.17	7.08	7.15	7.11	7.15	7.19	7.1	7.17	7.21	7.19	7.2	7.21	7.1
06KCBKLqoI0OXkmEKk	7.39	7.4	7.38	7.43	7.42	7.42	7.5	7.46	7.4	7.38	7.36	7.37	7.29	7.38	7.33	7.32	7.39	7.34	7.46	7.56	7.43	7.31	7.48	7.58	7.53	7.46	7.35	7.44	7.52	7.52	7.49	7.48	7.46	7.56	7.39	7.31	7.35	7.49	7.5	7.49	7.5	7.47	7.36	7.42	7.38	7.32	7.55	7.35	7.44
06KlUp31RpNfjTvdv0	7.08	7.14	7.12	7.15	7.13	7.09	7.04	7.11	7.24	7.12	7.08	7.11	7.17	7.13	7.1	7.14	7.17	7.09	7.1	7.14	7.13	7	7.05	6.94	7	7.15	7.06	7.13	7.1	7.11	7.18	7.03	7.16	7.06	7.06	7.06	7.07	7.08	7.13	7.12	7.15	7.09	7.06	7.1	7.06	7.06	7.09	7.16	7.07
06kUOBasAECpmN9JIU	7.14	7.16	7.14	7.13	7.12	7.17	7.21	7.22	7.13	7.12	7.15	7.18	7.11	7.16	7.15	7.16	7.18	7.09	7.14	7.17	7.18	7.12	7.13	7.15	7.13	7.19	7.15	7.18	7.15	7.13	7.21	7.1	7.15	7.18	7.13	7.14	7.22	7.16	7.17	7.23	7.21	7.15	7.1	7.16	7.08	7.09	7.09	7.18	7.16
06lKHneI.ioBOhX.pU	8.68	8.44	9.19	8.45	8.57	9.04	9.18	9.38	9.14	8.83	8.54	8.68	9.49	9.1	8.73	9.27	8.72	10.76	8.38	8.41	8.86	8.19	8.42	8.12	8.07	8.83	8.68	8.3	8.4	8.37	8.18	8.14	8.37	8.83	9.69	8.1	8.54	8.8	8	8.32	8.74	8.41	8.87	8.57	8.81	7.97	8.05	8.69	8.12
06lN7ceF6X07CSe6nk	9.07	9.44	8.96	9.12	8.79	8.9	8.85	9.84	8.82	9.24	8.86	8.97	9.04	8.84	8.93	9	9.15	9.05	9.84	9.76	9.72	9.39	9.06	9.05	9.67	8.96	8.93	9.74	9.86	9.13	9.33	10.23	9.36	9.45	9.43	9.68	8.9	9.62	9.27	9.79	9.38	8.72	8.97	9.01	9.64	9.26	9.25	9.43	9.28
06lnSCCXUd1JBLt9Sg	8.06	8.03	7.92	7.8	7.94	8.44	8.36	8.03	8	8	8.26	8.14	8.38	8.09	7.95	8.01	8.09	8.1	8.03	8.33	8.02	8.23	8	8.32	8.13	8.03	7.91	8.16	8.22	8.12	8.28	8.28	8.19	8.24	8.07	8.19	7.87	8.31	8.15	8.15	8.23	7.88	8.01	8.19	8.02	8.13	8.17	8.22	8.35
06mJeuVS06T6QrnXkU	7.28	7.26	7.22	7.28	7.22	7.3	7.21	7.29	7.21	7.24	7.17	7.25	7.2	7.18	7.16	7.24	7.24	7.22	7.43	7.28	7.31	7.33	7.31	7.74	7.42	7.28	7.3	7.31	7.22	7.3	7.2	7.25	7.26	7.27	7.2	7.23	7.25	7.32	7.21	7.26	7.28	7.15	7.36	7.22	7.29	7.3	7.38	7.25	7.2
06np9S.zv1QOuPSe9Q	7.34	7.37	7.35	7.4	7.35	7.33	7.28	7.42	7.39	7.29	7.31	7.38	7.44	7.33	7.35	7.45	7.51	7.25	7.29	7.32	7.32	7.45	7.56	7.31	7.59	7.33	7.57	7.43	7.25	7.4	7.46	7.38	7.4	7.31	7.38	7.62	7.57	7.4	7.72	7.45	7.4	7.44	7.37	7.67	7.34	7.29	7.33	7.35	7.56
06OeG_cSdOfKKkQS6U	7.23	7.26	7.3	7.24	7.22	7.28	7.28	7.25	7.28	7.26	7.24	7.22	7.27	7.4	7.32	7.21	7.25	7.24	7.21	7.3	7.22	7.25	7.26	7.18	7.38	7.31	7.25	7.35	7.33	7.31	7.34	7.39	7.31	7.27	7.26	7.29	7.29	7.34	7.29	7.36	7.23	7.29	7.27	7.24	7.33	7.18	7.21	7.34	7.35
06OMTM0gM077E0yUV4	7.18	7.2	7.21	7.23	7.09	7.11	7.21	7.22	7.19	7.2	7.24	7.24	7.06	7.29	7.2	7.15	7.2	7.13	7.23	7.29	7.23	7.3	7.21	7.24	7.2	7.2	7.2	7.18	7.23	7.23	7.17	7.24	7.2	7.22	7.17	7.2	7.18	7.12	7.19	7.23	7.3	7.17	7.19	7.17	7.25	7.23	7.25	7.21	7.18
06oqucekTLkyLUIO0U	7.48	7.5	7.38	7.37	7.43	7.51	7.54	7.39	7.42	7.42	7.4	7.35	7.4	7.44	7.46	7.31	7.45	7.38	7.64	7.46	7.48	7.61	7.63	8.01	7.87	7.6	7.36	7.59	7.31	7.55	7.56	7.69	7.59	7.55	7.47	7.43	7.38	7.51	7.64	7.61	7.42	7.43	7.42	7.36	7.4	7.46	7.33	7.56	7.47
06p_lMykS8PlRi4XS0	7.41	7.49	7.44	7.47	7.42	7.4	7.53	7.38	7.47	7.37	7.59	7.32	7.43	7.35	7.45	7.34	7.43	7.36	7.51	7.56	7.46	7.69	7.38	7.78	7.65	7.36	7.54	7.49	7.49	7.53	7.55	7.47	7.58	7.55	7.41	7.4	7.34	7.49	7.44	7.5	7.43	7.38	7.38	7.42	7.35	7.39	7.46	7.5	7.45
06PijuKCzmp1BPuSec	7.5	7.67	7.49	7.42	7.43	7.25	7.24	7.43	7.49	7.48	7.41	7.79	7.22	7.45	7.35	7.65	7.3	7.62	7.38	7.27	7.56	7.51	8.03	7.31	7.35	7.31	7.36	7.45	7.8	7.57	7.45	7.59	7.76	7.49	7.49	7.7	7.61	7.54	7.44	7.6	7.4	7.54	7.39	7.5	7.36	7.61	7.64	7.52	7.6
06pUwfq.VAoANWq16g	7.27	7.21	7.28	7.24	7.26	7.21	7.24	7.22	7.34	7.3	7.22	7.23	7.34	7.3	7.37	7.22	7.29	7.28	7.31	7.2	7.23	7.17	7.22	7.17	7.35	7.27	7.35	7.3	7.27	7.26	7.23	7.31	7.27	7.22	7.23	7.32	7.33	7.2	7.28	7.22	7.3	7.26	7.32	7.24	7.19	7.24	7.19	7.3	7.22
06QoKyj94B0pfBQyvo	8.66	8.85	8.96	8.6	8.77	8.4	8.12	8.13	8.54	9.82	9.18	8.56	8.4	9.23	8.52	8.95	8.53	8.68	7.16	7.21	7.18	7.18	7.17	7.13	7.19	7.54	8.93	7.33	7.16	7.34	7.42	7.56	7.68	7.42	8.83	7.19	9.04	7.86	7.25	7.24	7.68	8.98	9.82	9.65	8.91	7.2	7.15	7.53	8.26
06Qp9fW781eyU0.C0o	10.19	9.92	10.49	10.63	10.93	11.13	10.3	11.04	10.35	10.55	10.69	10.48	10.8	10.58	10.67	10.17	10.11	9.9	10.72	10.35	10.1	10.25	10.55	10.06	10.47	10.81	10.81	11.12	9.85	10.26	10.39	10.31	10.18	10.97	10.63	11.08	10.49	10.3	11.03	10.53	10.25	11.01	10.92	10.6	10.75	10.82	10.61	10.28	9.82
06qxUSh_IEXuXV52lI	7.46	7.52	7.58	7.71	7.61	7.6	7.51	7.45	7.54	7.58	7.63	7.51	7.49	7.5	7.42	7.54	7.58	7.64	7.56	7.93	7.53	7.76	7.7	7.83	7.72	7.51	7.47	7.55	7.69	7.51	7.55	7.5	7.53	7.4	7.54	7.33	7.51	7.36	7.43	7.45	7.42	7.51	7.43	7.58	7.5	7.56	7.66	7.43	7.35
06RiJUZWfezdXQwJdc	7.43	7.38	7.67	7.37	7.33	7.39	7.25	7.4	7.3	7.39	7.4	7.61	7.67	7.73	7.23	7.45	7.25	7.7	7.5	7.83	7.21	7.47	7.2	7.18	7.19	7.69	7.51	7.32	7.48	7.23	7.54	7.5	7.32	7.39	7.41	7.19	7.36	7.34	7.3	7.37	7.67	7.52	7.41	7.44	7.53	7.38	7.45	8.24	7.44
06RSiHSK_31Mp6T91I	7.16	7.17	7.19	7.21	7.17	7.18	7.2	7.14	7.19	7.11	7.15	7.21	7.21	7.17	7.15	7.18	7.13	7.18	7.22	7.18	7.2	7.18	7.2	7.18	7.2	7.15	7.16	7.2	7.21	7.18	7.15	7.17	7.16	7.18	7.16	7.16	7.2	7.19	7.2	7.24	7.21	7.23	7.18	7.17	7.18	7.17	7.21	7.16	7.19
06ryW0gOo9FUiJEiXU	7.29	7.23	7.26	7.27	7.24	7.25	7.27	7.29	7.21	7.2	7.3	7.19	7.25	7.23	7.22	7.16	7.21	7.24	7.3	7.19	7.22	7.32	7.19	7.17	7.21	7.25	7.27	7.27	7.18	7.17	7.22	7.23	7.29	7.17	7.28	7.2	7.24	7.19	7.22	7.3	7.24	7.28	7.24	7.25	7.22	7.22	7.16	7.29	7.2
06s0AQhA570qAgvpCc	7.27	7.6	7.46	7.77	7.31	7.31	7.28	7.32	7.64	7.34	7.49	7.65	7.31	8.03	7.37	7.75	7.64	7.42	7.16	7.17	7.18	7.15	7.1	7.11	7.13	7.2	7.44	7.14	7.17	7.12	7.22	7.22	7.2	7.13	7.34	7.17	7.45	7.16	7.21	7.16	7.13	7.35	7.86	8.56	8.3	7.18	7.16	7.15	7.08
06snwKqkXqlv_.DFfk	7.52	7.42	7.43	7.52	7.43	7.45	7.61	7.42	7.5	7.37	7.53	7.37	7.52	7.4	7.47	7.39	7.53	7.31	7.58	7.72	7.59	7.75	7.91	7.52	7.67	7.46	7.38	7.68	7.48	7.57	7.62	7.67	7.58	7.56	7.46	7.36	7.41	7.49	7.56	7.49	7.49	7.47	7.45	7.43	7.42	7.47	7.57	7.57	7.52
06so9n.YDXUqESVPmI	7.22	7.22	7.21	7.19	7.18	7.26	7.23	7.16	7.2	7.66	7.21	7.21	7.19	7.28	7.24	7.15	7.19	7.22	7.22	7.28	7.24	7.26	7.26	7.22	7.34	7.19	7.21	7.25	7.38	7.21	7.19	7.25	7.18	7.24	7.18	7.34	7.15	7.15	7.17	7.25	7.21	7.23	7.15	7.22	7.2	7.36	7.33	7.19	7.17
06TJxbi90koH1SY4w4	7.32	7.54	7.28	7.92	7.81	7.68	8.42	8.27	8.17	7.79	7.93	8.04	7.47	8.2	8.57	7.66	7.64	7.91	8.43	7.18	8.01	7.68	8.25	7.16	7.78	7.25	7.59	7.53	7.62	7.56	7.28	7.32	7.83	7.23	7.52	7.4	7.81	7.78	7.4	7.69	7.88	7.7	7.42	7.83	7.9	7.56	7.9	7.8	7.87
06Tt_Ktf37yi.NeUlQ	7.72	7.42	7.72	7.19	7.44	7.22	7.21	7.4	7.28	7.31	7.27	7.4	7.64	7.19	7.18	7.83	7.27	7.2	7.21	7.44	7.23	7.19	8.5	7.18	7.2	7.25	7.22	7.78	7.18	7.5	8.25	7.44	7.38	7.36	7.47	7.34	7.8	7.65	7.19	7.43	7.8	7.45	7.26	7.29	7.25	7.58	7.21	7.18	7.25
06UIkIllkoKmU667a4	7.18	7.14	7.13	7.15	7.36	7.13	7.09	7.16	7.13	7.17	7.1	7.37	7.12	7.35	7.21	7.15	7.31	7.12	7.16	7.22	7.18	7.2	7.2	7.18	7.2	7.83	7.13	7.27	7.12	7.18	7.18	7.2	7.3	7.16	7.08	7.22	7.21	7.27	7.31	7.23	7.33	7.19	7.27	7.17	7.2	7.16	7.18	7.19	7.24
06V_npN6qB_vfo6PXk	7.37	7.45	7.24	7.27	7.35	7.33	7.39	7.26	7.32	7.32	7.29	7.28	7.34	7.38	7.31	7.34	7.35	7.37	7.42	7.29	7.33	7.19	7.2	7.18	7.21	7.23	7.3	7.41	7.23	7.39	7.3	7.36	7.5	7.38	7.33	7.3	7.33	7.26	7.28	7.46	7.38	7.34	7.32	7.24	7.33	7.21	7.31	7.38	7.39
06xdRFf5OjyfTfRY4o	7.17	7.25	7.2	7.23	7.26	7.27	7.21	7.3	7.28	7.21	7.33	7.26	7.25	7.27	7.25	7.29	7.24	7.21	7.25	7.26	7.31	7.24	7.26	7.31	7.33	7.27	7.24	7.27	7.3	7.22	7.26	7.22	7.26	7.2	7.18	7.23	7.24	7.32	7.3	7.26	7.23	7.24	7.28	7.31	7.34	7.26	7.24	7.26	7.18
06XdXqNfZeY5f4Xekg	7.22	7.32	7.35	7.32	7.36	7.19	7.3	7.19	7.33	7.37	7.29	7.33	7.21	7.25	7.27	7.31	7.29	7.38	7.43	7.4	7.31	7.26	7.35	7.57	7.37	7.22	7.16	7.25	7.24	7.19	7.17	7.25	7.26	7.24	7.19	7.43	7.16	7.14	7.2	7.28	7.24	7.26	7.31	7.25	7.25	7.4	7.48	7.22	7.24
06Xf9VyF3lLUUEd0uo	7.41	7.4	7.53	7.44	7.47	7.61	7.43	7.29	7.36	7.33	7.3	7.37	7.36	7.41	7.33	7.49	7.35	7.83	7.31	7.3	7.47	7.35	7.29	7.25	7.22	7.34	7.27	7.39	7.33	7.31	7.29	7.32	7.36	7.36	7.39	7.3	7.34	7.39	7.32	7.31	7.36	7.35	7.44	7.49	7.48	7.54	7.45	7.35	7.47
06Xqf3il83jl3kvTtU	11.59	10.84	11.47	11.09	10.38	10.51	11.05	10.91	11.14	10.99	10.34	10.36	10.94	10.3	10.94	11.16	11.03	10.68	10	10.74	11.06	10.99	9.98	10.68	10.28	10.55	10.18	10.28	11.06	10.86	10.28	10.42	10.54	10.24	10.74	10.51	10.42	10.92	10.9	10.9	9.94	10.2	9.78	9.98	10.03	10.44	10.83	11.18	10.94
06xxBAxNBuCCqJN2qc	7.37	7.3	7.44	7.32	7.38	7.3	7.35	7.33	7.31	7.29	7.37	7.34	7.3	7.3	7.38	7.34	7.3	7.33	7.33	7.64	7.29	7.28	7.42	7.3	7.26	7.33	7.34	7.34	7.45	7.42	7.38	7.34	7.37	7.37	7.4	7.26	7.35	7.31	7.29	7.32	7.28	7.36	7.32	7.31	7.26	7.38	7.3	7.35	7.3
073_vqfuXI8oiglKpU	8.3	8.26	7.83	7.99	8.14	7.64	7.54	8.08	8.23	7.58	7.81	8.22	7.76	7.6	7.71	8.13	8.37	7.73	7.31	7.94	8.04	8	8.96	8.6	8.3	8.15	8.06	7.26	8.26	8.32	8.74	8.92	8.3	8.14	8.03	7.33	8.4	7.92	8.42	8.24	8.03	8.25	7.48	8.12	7.57	8.66	8.07	8.07	8.56
07_Q12CkSc4nW..r4o	7.07	7.15	7.13	7.07	7.11	7.07	7.18	7.07	7.11	7.07	7.13	7.14	7.09	7.11	7.08	7.11	7.13	7.17	7.19	7.18	7.18	7.15	7.18	7.12	7.17	7.11	7.17	7.07	7.16	7	7.12	7.12	7.11	7.07	7.09	7.17	7.13	7.06	7.16	7.1	7.09	7.13	7.13	7.06	7.08	7.17	7.17	7.1	7.04
07aNe4sp6l1XqSr3UI	8.6	8.06	8.49	8.72	9.46	8.49	8.99	7.81	8.89	8.41	8.37	8.65	8.46	8.77	8.03	8.18	8.03	8.76	8.35	8.44	9.06	8.46	8.21	9.75	8.27	9.53	8.12	8.62	8.25	8.46	8.26	8.25	8.37	8.61	8.42	8.37	8.05	8.65	8.63	9.12	8.71	8.21	8.67	7.9	8.66	8.54	9.16	8.46	8.58
07e0yQr0lQtUD3x5Xo	7.3	7.33	7.28	7.33	7.37	7.3	7.32	7.31	7.28	7.28	7.32	7.34	7.26	7.29	7.27	7.27	7.26	7.27	7.24	7.2	7.34	7.24	7.38	7.37	7.25	7.22	7.31	7.28	7.35	7.24	7.33	7.27	7.29	7.26	7.3	7.33	7.37	7.31	7.25	7.25	7.3	7.37	7.36	7.35	7.38	7.31	7.31	7.36	7.33
07etTlJ7ol4V7W6SJw	7.57	7.42	7.35	7.45	7.24	7.51	7.3	7.47	7.24	7.24	7.33	7.31	7.3	7.33	7.36	7.27	7.17	7.43	7.81	7.62	7.38	7.42	7.77	7.49	7.48	7.22	7.31	7.27	7.4	7.41	7.47	7.39	7.31	7.78	7.25	7.44	7.27	7.26	7.33	7.47	7.22	7.27	7.29	7.27	7.26	7.62	7.49	7.32	7.31
07EZK7WX_6Xo3qG69o	7.23	7.25	7.16	7.23	7.21	7.22	7.26	7.27	7.13	7.2	7.29	7.22	7.22	7.18	7.24	7.22	7.21	7.25	7.39	7.28	7.25	7.32	7.38	7.37	7.43	7.19	7.23	7.24	7.47	7.23	7.18	7.22	7.24	7.28	7.19	7.34	7.2	7.16	7.24	7.23	7.2	7.18	7.22	7.24	7.26	7.29	7.32	7.18	7.26
07fRpJv_dESSf_RlUo	10.24	11.05	9.49	11.74	9.83	9.25	10.21	9.37	9.44	8.99	9.75	10.21	9.65	9.27	9.27	10.1	10.72	9.38	9.8	9.96	10.07	9.76	10.13	10.44	9.81	10.01	9.92	10.54	10.02	10.41	10.74	9.62	10.39	9.46	9.19	9.81	9.79	9.32	10.74	9.36	9.85	9.56	9.18	10.92	9.95	11.09	9.95	10.01	11.03
07gP0gZ6kP_An1qqI4	7.26	7.28	7.21	7.21	7.27	7.34	7.24	7.34	7.25	7.24	7.29	7.25	7.32	7.31	7.27	7.22	7.22	7.3	7.32	7.21	7.37	7.25	7.21	7.35	7.29	7.22	7.23	7.24	7.35	7.24	7.32	7.25	7.25	7.23	7.19	7.48	7.25	7.15	7.22	7.27	7.28	7.24	7.37	7.28	7.27	7.29	7.45	7.24	7.23
07HEaikl41d91J5eqM	7.33	7.32	7.37	7.4	7.43	7.36	7.31	7.35	7.33	7.29	7.29	7.42	7.22	7.32	7.32	7.38	7.34	7.29	7.31	7.23	7.25	7.22	7.4	7.18	7.33	7.36	7.39	7.25	7.3	7.28	7.27	7.27	7.36	7.24	7.27	7.36	7.27	7.34	7.26	7.32	7.28	7.32	7.37	7.43	7.37	7.45	7.33	7.39	7.28
07jk11aXl4leOee0iA	11.75	10.73	11.51	11.13	11.03	12.18	11.44	10.89	12.15	9.72	10.92	10.96	11.95	11.57	11.5	11.73	11.67	12.74	11.06	11.59	12.14	11.27	10.98	10.72	12.65	11.39	11.28	10.72	11.23	10.95	11.38	10.23	10.48	11.65	11.09	11.16	10.39	11.5	10.92	11.4	11.6	10.9	10.81	11.36	10.44	10.5	11.01	10.75	10.36
07kBV1WSede9Q0d6gQ	7.28	7.33	7.37	7.36	7.36	7.28	7.17	7.3	7.3	7.28	7.3	7.27	7.29	7.31	7.21	7.29	7.33	7.27	7.36	7.21	7.25	7.28	7.21	7.25	7.3	7.29	7.32	7.25	7.3	7.31	7.33	7.3	7.25	7.26	7.28	7.32	7.33	7.29	7.26	7.32	7.21	7.22	7.32	7.29	7.27	7.3	7.22	7.25	7.36
07krpey67CToT8JOEU	7.44	7.46	7.89	7.53	7.56	7.56	7.57	7.5	7.58	7.66	7.5	7.44	7.52	7.68	7.65	7.77	7.53	8.09	7.37	7.54	7.56	7.37	7.81	7.2	7.36	7.32	7.48	7.5	7.56	7.74	7.59	7.44	8.04	7.64	7.71	7.63	7.54	7.77	7.48	7.82	7.63	7.59	7.57	7.56	7.77	7.65	7.47	7.36	7.55
07lY5uVChBlPCA9tPY	12.53	12.95	12.44	12.98	13.35	11.3	11.68	12.97	13	13.18	13.06	13.49	12.3	13.11	11.8	11.83	13.33	12.81	11.29	11.49	10.74	9.83	9.77	10.62	9.58	11.43	12.96	11.12	9.63	10.86	11.62	12.79	11.21	11.73	12.74	10.87	12.27	11.66	11.26	11.06	10.59	13.02	12.66	11.85	13.5	10.62	11.36	10.67	11.48
07NyfWpQhJ06SKXQik	11.63	12.16	11.52	11.46	12.02	11.74	11.34	11.05	11.99	12.85	12.85	12.9	11.86	12.3	11.63	11.62	11.41	10.93	12.22	12.17	11.89	11.25	11.47	11.89	11.81	12.28	11.46	11.94	11.21	11.73	11.99	12.31	12.34	11.56	11.86	12.06	11.01	11.67	11.25	11.41	11.8	11.78	12.3	11.36	11.67	12.04	11.96	11.57	11.78
07oEYidddKpekdF9z0	8.81	8.36	9.08	8.61	8.63	9.19	8.61	8.46	8.36	9.27	8.27	7.96	8.49	8.82	9.58	8.42	8.1	7.98	8.97	9.05	9.53	8.28	8.27	7.35	8.12	9.04	8	8.71	8.29	8.65	8.64	8.75	8.08	8.89	8.8	8.34	8.06	8.71	8.35	8.33	9.32	8.35	7.9	8.07	8.31	8.55	8.66	8.37	8.2
07okXNE1CCS5xCCGAI	7.17	7.17	7.15	7.14	7.19	7.19	7.17	7.17	7.15	7.13	7.16	7.12	7.19	7.19	7.17	7.19	7.17	7.16	7.16	7.18	7.18	7.15	7.18	7.17	7.16	7.17	7.22	7.22	7.15	7.17	7.17	7.19	7.23	7.2	7.17	7.11	7.16	7.27	7.18	7.16	7.18	7.18	7.12	7.18	7.23	7.12	7.12	7.25	7.25
07ooIfApI4FNSwoC80	7.2	7.14	7.15	7.18	7.14	7.17	7.22	7.22	7.19	7.21	7.15	7.18	7.18	7.13	7.12	7.16	7.12	7.1	7.19	7.19	7.19	7.22	7.19	7.21	7.2	7.26	7.16	7.18	7.21	7.11	7.15	7.27	7.24	7.15	7.16	7.18	7.21	7.26	7.26	7.2	7.15	7.16	7.26	7.13	7.19	7.22	7.18	7.16	7.33
07oQ6Kiel6gR6Cs1ug	7.25	7.22	7.27	7.2	7.27	7.39	7.26	7.3	7.26	7.24	7.24	7.33	7.18	7.29	7.16	7.23	7.28	7.27	7.33	7.49	7.25	7.21	7.27	7.42	7.52	7.25	7.26	7.3	7.29	7.26	7.2	7.26	7.25	7.25	7.23	7.26	7.29	7.32	7.33	7.3	7.29	7.28	7.33	7.22	7.38	7.33	7.45	7.28	7.23
07pmZey1Scf6KeKQig	14.3	14.44	14.15	14.37	13.88	14.75	14.89	14.21	14.33	14.26	14.37	13.9	14.72	14.3	14.5	14.52	14.29	14.87	12.65	14.04	13.7	15.28	13.52	14.32	14.19	13.6	14.79	13.22	14.07	14.11	13.19	13.44	13.64	14.59	14.56	14.72	14.2	14.19	14.27	14.48	14.44	14.53	14.22	14.34	14.15	13.48	13.98	14.27	13.57
07qOVXh8cTRKBKl9uo	7.37	7.22	7.37	7.36	7.37	7.3	7.28	7.35	7.35	7.35	7.31	7.32	7.26	7.39	7.32	7.41	7.41	7.43	7.38	7.54	7.28	7.51	7.3	7.25	7.41	7.3	7.23	7.31	7.33	7.29	7.31	7.27	7.39	7.34	7.41	7.22	7.37	7.39	7.32	7.31	7.34	7.36	7.35	7.39	7.33	7.43	7.39	7.29	7.28
07r01TorOjog1ed.Xo	7.1	7.13	7.1	7.16	7.07	7.07	7.12	7.17	7.11	7.13	7.13	7.15	7.16	7.12	7.14	7.08	7.11	7.15	7.17	7.18	7.16	7.17	7.16	7.13	7.1	7.16	7.18	7.09	7.17	7.09	7.12	7.1	7.12	7.11	7.1	7.15	7.09	7.05	7.13	7.11	7.19	7.13	7.1	7.07	7.21	7.12	7.16	7.12	7.18
07RFIupVQIoqagMzJE	7.26	7.31	7.29	7.22	7.33	7.39	7.32	7.24	7.29	7.22	7.32	7.22	7.26	7.36	7.25	7.2	7.28	7.23	7.26	7.33	7.35	7.24	7.31	7.4	7.38	7.24	7.28	7.27	7.47	7.26	7.28	7.25	7.23	7.3	7.26	7.32	7.3	7.3	7.29	7.31	7.32	7.2	7.27	7.34	7.17	7.32	7.37	7.25	7.33
07riWI_RT5ncl6kEEk	13.81	13.35	13.8	13.49	12.81	14.38	14.64	13.63	13.63	14.18	14.24	12.68	14.34	13.54	13.71	14.37	13.96	14.55	11.36	12.83	12.19	13.78	12.79	13.05	12.94	12.19	14.29	11.86	12.68	12.71	12.02	12.16	12.38	13.26	14.47	13.47	13.64	13.47	13.07	13.08	13.06	14.4	13.86	13.58	13.95	12.24	12.54	12.87	12.6
07s9uL2a_BB71.HedU	7.28	7.33	7.25	7.26	7.34	7.29	7.33	7.26	7.27	7.2	7.27	7.28	7.26	7.34	7.28	7.24	7.25	7.31	7.53	8.01	7.54	7.64	7.55	7.97	7.68	7.24	7.28	7.32	7.64	7.27	7.28	7.35	7.27	7.34	7.38	7.7	7.27	7.23	7.33	7.31	7.35	7.23	7.38	7.39	7.27	7.5	7.77	7.26	7.29
07sTsxEzx1MGCRLff8	7.09	7.14	7.18	7.09	7.18	7.17	7.12	7.18	7.19	7.14	7.17	7.19	7.24	7.11	7.2	7.06	7.13	7.15	7.15	7.17	7.17	7.16	7.19	7.17	7.11	7.19	7.16	7.11	7.16	7.07	7.2	7.15	7.13	7.07	7.17	7.13	7.2	7.17	7.1	7.08	7.24	7.13	7.11	7.05	7.16	7.16	7.17	7.1	7.13
07StVNCElE0p6qlCCA	7.57	7.59	7.62	7.6	7.58	7.7	7.69	7.49	7.52	7.59	7.6	7.48	7.42	7.51	7.64	7.48	7.64	7.62	7.63	7.88	7.67	7.7	7.46	7.87	7.79	7.62	7.56	7.82	7.48	7.73	7.63	7.74	7.63	7.72	7.47	7.66	7.51	7.44	7.71	7.57	7.6	7.61	7.49	7.49	7.54	7.58	7.57	7.68	7.48
07tB4iJ4BKCx67IJ5I	7.2	7.2	7.18	7.18	7.21	7.21	7.21	7.21	7.16	7.21	7.17	7.19	7.18	7.19	7.29	7.19	7.17	7.17	7.18	7.18	7.19	7.21	7.19	7.17	7.18	7.2	7.19	7.18	7.22	7.24	7.19	7.19	7.2	7.24	7.21	7.15	7.22	7.27	7.27	7.23	7.26	7.23	7.18	7.16	7.24	7.13	7.22	7.21	7.27
07U.gVEul9UldkeVSI	7.25	7.33	7.28	7.35	7.33	7.27	7.29	7.27	7.32	7.39	7.35	7.47	7.22	7.35	7.24	7.39	7.3	7.28	7.26	7.27	7.22	7.2	7.27	7.18	7.24	7.22	7.3	7.21	7.28	7.16	7.22	7.22	7.25	7.21	7.28	7.46	7.3	7.2	7.24	7.24	7.26	7.22	7.31	7.28	7.41	7.36	7.33	7.21	7.25
07uNftbpBfAbueS544	7.74	7.48	7.55	7.61	7.53	7.57	7.68	7.8	7.47	7.61	7.38	7.39	7.96	7.79	7.75	7.78	7.6	7.55	7.89	7.64	8.08	7.76	7.36	7.78	7.74	7.85	7.69	7.61	7.66	7.77	7.6	7.54	7.46	7.75	8.27	8.06	7.46	7.83	8.09	7.64	7.49	7.97	7.92	7.48	7.76	7.8	7.8	7.4	7.31
07UoDSEndFH4z6NXdE	7.12	7.15	7.14	7.11	7.12	7.13	7.21	7.18	7.16	7.16	7.14	7.14	7.14	7.13	7.11	7.16	7.12	7.1	7.14	7.17	7.17	7.11	7.15	7.12	7.09	7.14	7.17	7.19	7.15	7.2	7.17	7.12	7.1	7.19	7.17	7.09	7.04	7.15	7.16	7.14	7.15	7.17	7.08	7.14	7.12	7.12	7.13	7.13	7.2
07wOvuNAOeMuM6EOC8	7.13	7.13	7.18	7.21	7.2	7.18	7.16	7.16	7.15	7.12	7.12	7.22	7.14	7.2	7.13	7.16	7.15	7.11	7.16	7.18	7.18	7.16	7.12	7.16	7.08	7.11	7.2	7.04	7.15	7.17	7.13	7.21	7.12	7.18	7.15	7.17	7.14	7.16	7.17	7.13	7.16	7.09	7.14	7.13	7.15	7.16	7.12	7.15	7.15
07X51FGSlfn3VNBi34	7.25	7.26	7.36	7.42	8	7.26	7.26	7.63	7.21	7.44	7.32	7.39	7.34	7.35	7.6	7.31	7.3	7.92	7.71	7.59	7.34	8.19	7.25	7.57	7.52	7.17	7.26	7.38	7.59	7.16	7.2	7.5	7.15	7.27	7.24	7.37	7.25	7.12	7.25	7.33	7.5	7.35	7.4	7.34	7.41	7.53	7.74	7.22	7.22
07Z7.P6SpEB7TxDQFw	7.25	7.17	7.15	7.18	7.16	7.14	7.09	7.14	7.12	7.08	7.2	7.21	7.21	7.14	7.18	7.2	7.19	7.15	7.18	7.22	7.18	7.19	7.2	7.18	7.2	7.2	7.21	7.25	7.21	7.28	7.19	7.24	7.2	7.22	7.21	7.13	7.13	7.27	7.19	7.26	7.26	7.15	7.16	7.21	7.25	7.13	7.24	7.22	7.22
0899Yvk._fDgMg.8AA	7.08	7.14	7.14	7.16	7.13	7.05	7.17	7.23	7.16	7.19	7.14	7.19	7.15	7.21	7.11	7.12	7.14	7.16	7.22	7.19	7.19	7.26	7.21	7.17	7.28	7.17	7.14	7.09	7.16	7.23	7.16	7.22	7.24	7.17	7.17	7.18	7.15	7.22	7.24	7.07	7.18	7.15	7.19	7.15	7.22	7.18	7.21	7.17	7.25
08AMF3vB8P99dDBMDM	7.14	7.2	7.17	7.18	7.13	7.07	7.13	7.08	7.17	7.19	7.13	7.07	7.18	7.15	7.12	7.14	7.16	7.14	7.21	7.19	7.19	7.2	7.22	7.25	7.24	7.22	7.15	7.16	7.23	7.09	7.22	7.21	7.25	7.19	7.18	7.14	7.17	7.15	7.31	7.18	7.15	7.22	7.09	7.17	7.1	7.17	7.15	7.23	7.25
08dUkUArD4Ul0EQ.6E	7.6	7.63	7.7	8.3	8.11	7.75	7.61	7.81	8	7.98	7.92	7.9	7.75	8.4	8.02	7.7	8.03	8.02	7.34	7.19	7.24	7.22	7.2	7.16	7.19	7.47	7.97	7.28	7.21	7.21	7.43	7.25	7.3	7.46	7.8	7.22	7.81	7.45	7.4	7.3	7.28	7.98	8.06	8.19	7.84	7.25	7.27	7.41	7.43
08EDd8xP9c__0.wzfg	7.1	7.12	7.09	7.17	7.03	7.1	7.11	7.14	7.12	7.04	7.2	7.05	7.06	7.11	7.08	7.07	7.08	7.15	7.19	7.18	7.22	7.17	7.16	7.17	7.17	7.14	7.11	7.08	7.21	7.1	7.12	7.21	7.11	7.04	7.17	7.21	7.15	7.22	7.11	7.1	7.1	7.06	7.1	7.08	7.06	7.17	7.2	7.16	7.15
08jgcELUzzFrygonak	7.16	7.14	7.1	7.14	7.14	7.16	7.08	7.11	7.11	7.1	7.13	7.17	7.08	7.13	7.11	7.08	7.05	7.19	7.14	7.18	7.18	7.18	7.19	7.17	7.17	7.21	7.15	7.13	7.17	7.08	7.13	7.12	7.08	7.11	7.08	7.14	7.05	7.14	7.16	7.12	7.17	7.14	7.16	7.05	7.1	7.19	7.1	7.13	7.14
08K9maqUpCLyU4Il0I	7.34	7.36	7.26	7.28	7.25	7.29	7.25	7.28	7.26	7.25	7.28	7.3	7.27	7.15	7.22	7.24	7.31	7.35	7.23	7.19	7.24	7.19	7.18	7.16	7.2	7.37	7.33	7.35	7.2	7.3	7.37	7.37	7.3	7.31	7.23	7.17	7.25	7.28	7.33	7.3	7.38	7.3	7.22	7.3	7.31	7.22	7.16	7.31	7.31
08MEH6ADsCUKU4lf.0	7.24	7.26	7.27	7.3	7.27	7.31	7.38	7.25	7.26	7.28	7.22	7.2	7.25	7.32	7.33	7.25	7.29	7.2	7.23	7.2	7.24	7.2	7.23	7.18	7.22	7.26	7.32	7.27	7.22	7.28	7.38	7.27	7.29	7.35	7.3	7.22	7.3	7.38	7.3	7.45	7.29	7.26	7.26	7.36	7.44	7.25	7.23	7.32	7.35
08PiKpKnogokL7qiUo	7.52	7.61	7.59	7.48	7.55	7.57	7.93	7.68	7.54	7.59	8.09	7.81	7.63	7.63	7.76	7.59	7.66	8.03	7.49	7.32	7.69	8.14	7.71	8.05	8.09	7.7	7.69	7.75	8.23	7.81	7.52	8.29	8.17	7.93	7.68	7.51	8.05	7.56	7.75	7.96	7.62	7.64	7.72	7.66	7.54	7.69	7.44	7.98	8.04
08vqL.v1x8J0ofjFd4	7.24	7.2	7.28	7.16	7.18	7.13	7.22	7.22	7.16	7.19	7.2	7.23	7.21	7.18	7.25	7.18	7.71	7.21	7.2	7.2	7.21	7.18	7.18	7.18	7.2	7.19	7.14	7.18	7.22	7.18	7.22	7.2	7.14	7.22	7.22	7.17	7.16	7.21	7.15	7.2	7.2	7.2	7.17	7.14	7.21	7.2	7.33	7.18	7.22
08Z.115iGvZSIuXtXo	7.15	7.21	7.25	7.32	7.2	7.18	7.23	7.27	7.17	7.27	7.24	7.35	7.17	7.29	7.23	7.2	7.22	7.25	7.28	7.31	7.29	7.4	7.32	7.61	7.28	7.22	7.19	7.24	7.36	7.21	7.2	7.2	7.19	7.21	7.24	7.31	7.17	7.25	7.19	7.26	7.17	7.21	7.21	7.25	7.25	7.36	7.37	7.21	7.21
094dQtS73dfsFPSpBo	7.14	7.13	7.13	7.15	7.13	7.12	7.15	7.11	7.2	7.17	7.12	7.09	7.14	7.1	7.06	7.17	7.19	7.15	7.2	7.18	7.21	7.17	7.17	7.18	7.19	7.2	7.14	7.16	7.17	7.2	7.18	7.14	7.12	7.15	7.15	7.17	7.16	7.11	7.08	7.16	7.12	7.17	7.17	7.08	7.14	7.16	7.18	7.09	7.2
094l6qtdN5Ak6Iuk30	7.77	7.36	7.29	7.33	7.37	7.31	7.45	7.55	7.71	7.31	7.47	7.46	7.3	7.68	7.33	7.87	7.35	7.55	7.34	7.7	8	8.05	7.28	7.61	8.1	7.36	7.76	7.55	7.35	7.49	7.36	7.3	7.44	7.62	7.35	7.79	7.73	7.52	7.96	7.5	7.55	7.38	7.41	7.48	7.4	7.79	7.43	7.39	7.41
097eBEJe9y16aBEeqs	9.49	9.38	9.52	9.78	9.58	8.9	9.24	9.08	9.32	9.41	9.29	9.27	9.46	9.25	9.39	9.44	9.31	9.77	9.2	8.69	9.19	9.08	8.97	8.72	8.78	10.03	9.29	9.49	9.46	9.35	9.09	9.04	9.28	9.47	9.59	9.45	9.6	9.56	9.41	9.93	9.27	9.75	9.41	8.99	9.03	9.19	9.3	8.87	9.11
09B2U0a61Ska2eQTSA	7.32	7.39	7.33	7.28	7.37	7.44	7.42	7.39	7.31	7.37	7.39	7.46	7.26	7.37	7.28	7.35	7.3	7.31	7.45	7.29	7.49	7.35	7.62	7.21	7.25	7.27	7.36	7.29	7.26	7.28	7.37	7.3	7.31	7.26	7.44	7.37	7.24	7.36	7.32	7.33	7.31	7.34	7.46	7.36	7.43	7.4	7.35	7.37	7.29
09BFJ8S5dFNvQ7d6NU	7.26	7.27	7.26	7.24	7.24	7.31	7.29	7.26	7.21	7.25	7.21	7.28	7.26	7.23	7.23	7.31	7.26	7.24	7.23	7.21	7.22	7.19	7.23	7.19	7.21	7.27	7.26	7.32	7.22	7.25	7.2	7.3	7.21	7.24	7.35	7.26	7.32	7.32	7.25	7.28	7.27	7.23	7.35	7.27	7.39	7.26	7.23	7.25	7.3
09EeH8o6acXcqKAHko	7.15	7.29	7.2	7.23	7.21	7.27	7.25	7.23	7.19	7.23	7.2	7.21	7.18	7.38	7.27	7.21	7.19	7.25	7.19	7.19	7.23	7.32	7.2	7.17	7.2	7.25	7.23	7.24	7.21	7.23	7.23	7.19	7.22	7.33	7.19	7.21	7.26	7.31	7.19	7.19	7.24	7.22	7.13	7.21	7.22	7.18	7.26	7.19	7.22
09FBEqSl0aA5wl0TVU	7.22	7.3	7.25	7.28	7.21	7.26	7.18	7.27	7.2	7.32	7.23	7.31	7.2	7.22	7.23	7.31	7.26	7.23	7.4	7.19	7.35	7.23	7.31	7.36	7.35	7.25	7.25	7.22	7.24	7.23	7.37	7.24	7.22	7.29	7.26	7.36	7.21	7.29	7.26	7.1	7.23	7.34	7.34	7.27	7.26	7.33	7.36	7.25	7.22
09IOY_IkhKdpUXOQSU	7.87	7.81	8.21	7.65	8.99	7.64	8.17	7.9	8.41	9.3	8.36	7.72	8.66	8.82	8.15	8.2	8.02	8.12	8.21	8.94	7.97	7.95	9.43	8.17	8.6	9.75	7.96	8.89	7.6	8.44	8.19	8.88	7.9	8.15	8.53	8.65	8.44	9.07	7.97	9.38	8	9.17	8.85	8.28	7.48	8.26	8.29	8.05	8.03
09KN3LnqsIxlqKoBNE	7.4	7.36	7.41	7.33	7.36	7.43	7.3	7.43	7.47	7.34	7.36	7.37	7.34	7.37	7.43	7.4	7.41	7.33	7.62	7.3	7.27	7.33	7.45	7.45	7.45	7.44	7.39	7.52	7.32	7.41	7.32	7.43	7.48	7.53	7.32	7.4	7.27	7.37	7.43	7.45	7.5	7.38	7.35	7.28	7.28	7.3	7.54	7.35	7.36
09L_MVAz8CRq7Vy6Eg	7.17	7.14	7.21	7.16	7.14	7.17	7.22	7.19	7.21	7.18	7.17	7.26	7.13	7.15	7.22	7.19	7.2	7.2	7.17	7.26	7.21	7.18	7.2	7.18	7.14	7.18	7.15	7.16	7.18	7.14	7.15	7.2	7.17	7.21	7.13	7.18	7.22	7.26	7.21	7.19	7.21	7.17	7.15	7.18	7.24	7.26	7.2	7.2	7.2
09lbgqkoSrmZ66K_A8	7.47	7.37	7.42	7.54	7.43	7.57	7.52	7.39	7.49	7.33	7.33	7.53	7.37	7.45	7.6	7.4	7.4	7.41	7.44	7.42	7.46	7.29	7.29	7.26	7.31	7.61	7.46	7.7	7.49	7.49	7.75	8.01	7.49	7.44	7.46	7.55	7.37	7.56	7.65	7.41	7.48	7.36	7.38	7.5	7.39	7.73	7.37	7.58	7.31
09lNw0Ne0cx.r17dCk	7.24	7.16	7.14	7.1	7.28	7.25	7.21	7.3	7.23	7.2	7.17	7.17	7.24	7.15	7.12	7.14	7.17	7.17	7.18	7.18	7.21	7.18	7.19	7.18	7.18	7.21	7.26	7.18	7.18	7.15	7.22	7.23	7.2	7.11	7.23	7.23	7.2	7.24	7.28	7.17	7.21	7.18	7.12	7.23	7.23	7.15	7.18	7.14	7.26
09NCqOPfoaE3.XV39Q	7.53	7.38	7.54	7.58	7.31	7.31	7.38	7.22	7.39	7.52	7.35	7.35	7.32	7.43	7.29	7.26	7.44	7.52	7.2	7.17	7.21	7.16	7.19	7.17	7.2	7.34	7.3	7.32	7.21	7.31	7.26	7.18	7.31	7.38	7.33	7.15	7.33	7.31	7.35	7.2	7.28	7.31	7.27	7.34	7.29	7.14	7.23	7.19	7.24
09ni9FCvd9ShJvVRII	7.15	7.15	7.14	7.13	7.16	7.18	7.19	7.13	7.2	7.21	7.18	7.1	7.2	7.22	7.28	7.15	7.17	7.15	7.19	7.17	7.21	7.12	7.15	7.16	7.16	7.2	7.2	7.21	7.13	7.24	7.16	7.2	7.14	7.2	7.15	7.18	7.22	7.14	7.25	7.2	7.22	7.14	7.31	7.23	7.31	7.13	7.12	7.14	7.13
09NJWUI6Y5CaUIqYE8	10.65	11.03	11.18	11	11.53	12.17	11.36	10.99	11.23	11.55	11.65	11.43	11.74	11.6	11.44	10.91	11	9.93	12.07	12.25	11.75	10.65	11.17	11.76	11.08	12.26	11.3	11.82	11.7	11.71	11.7	12.48	12.13	11.53	11.42	12.26	11.38	12.06	11.76	11.08	11.81	10.88	12.14	11.77	11.43	11.53	11.79	11.45	11.39
09Q5NXnjUg7RWooZKM	7.27	7.23	7.23	7.15	7.4	7.2	7.21	7.22	7.21	7.23	7.2	7.18	7.2	7.17	7.19	7.21	7.17	7.23	7.16	7.19	7.18	7.2	7.2	7.18	7.87	7.23	7.23	7.2	7.2	7.17	7.23	7.21	7.17	7.17	7.27	7.24	7.45	7.25	7.2	7.21	7.14	7.38	7.25	7.33	7.2	7.21	7.2	7.21	7.2
09SlMCHR1glJpOuFSc	7.12	7.14	7.15	7.12	7.54	7.14	7.16	7.2	7.21	7.18	7.14	7.31	7.25	7.16	7.26	7.19	7.19	7.31	7.17	7.17	7.18	7.16	7.19	7.17	7.15	7.25	7.19	7.17	7.15	7.2	7.22	7.19	7.27	7.17	7.12	7.18	7.3	7.21	7.17	7.22	7.19	7.28	8.48	7.08	7.19	7.15	7.18	7.33	7.26
09StUlxV3ud.qt6REQ	7.26	7.27	7.3	7.34	7.37	7.3	7.27	7.28	7.26	7.26	7.3	7.36	7.27	7.26	7.28	7.31	7.34	7.54	7.29	7.23	7.2	7.22	7.21	7.17	7.2	7.26	7.23	7.22	7.31	7.23	7.15	7.21	7.31	7.24	7.29	7.2	7.23	7.28	7.18	7.25	7.15	7.27	7.19	7.33	7.4	7.25	7.17	7.16	7.24
09tew3v3K4JMdS7.Ko	9.58	9.05	10	10.52	10.51	12.44	10.22	9.42	10.34	10.33	10.52	9.25	10	11.61	10.08	10.11	10.67	8.33	9.11	8.74	9.32	9.12	8.65	9.04	8.7	9.35	10.41	9.49	8.72	8.73	8.95	9.19	9.34	10.85	9.88	9.12	9.78	9.25	8.94	8.9	10.57	9.6	10.49	10.57	10.49	8.99	8.98	9.45	9.01
09UDP0a.V.GvERUB_o	7.19	7.24	7.28	7.31	7.2	7.11	7.24	7.24	7.26	7.25	7.25	7.21	7.26	7.22	7.23	7.26	7.26	7.25	7.27	7.19	7.21	7.22	7.26	7.18	7.2	7.23	7.23	7.26	7.21	7.27	7.21	7.22	7.25	7.34	7.3	7.27	7.27	7.29	7.26	7.27	7.29	7.26	7.3	7.3	7.33	7.2	7.2	7.27	7.25
09UKOuCCo.URll0dJU	7.15	7.2	7.18	7.19	7.09	7.09	7.15	7.22	7.08	7.14	7.17	7.16	7.18	7.08	7.09	7.2	7.13	7.15	7.22	7.18	7.2	7.19	7.21	7.17	7.2	7.24	7.03	7.21	7.18	7.23	7.15	7.12	7.18	7.13	7.19	7.14	7.16	7.15	7.15	7.17	7.17	7.12	7.15	7.2	7.13	7.24	7.18	7.16	7.22
09UoqgBl.sIZCerjp8	7.39	7.23	7.25	7.28	7.19	7.3	7.24	7.23	7.28	7.21	7.23	7.19	7.29	7.23	7.23	7.19	7.28	7.21	7.2	7.19	7.23	7.19	7.21	7.18	7.21	7.22	7.19	7.29	7.24	7.38	7.24	7.24	7.3	7.18	7.2	7.17	7.23	7.24	7.43	7.28	7.35	7.23	7.22	7.17	7.19	7.19	7.17	7.3	7.33
09WBElKBRlCKCOdSRI	7.35	7.43	7.36	7.35	7.3	7.37	7.38	7.38	7.32	7.54	7.25	7.39	7.37	7.31	7.35	7.36	7.34	7.34	7.44	7.36	7.39	7.52	7.63	7.66	7.54	7.38	7.43	7.36	7.5	7.39	7.36	7.43	7.53	7.34	7.32	7.33	7.4	7.42	7.42	7.38	7.31	7.36	7.49	7.58	7.38	7.55	7.24	7.43	7.39
09wNeiJ67yr_P6UnkM	7.26	7.31	7.29	7.49	7.39	7.25	7.22	7.34	7.48	7.52	7.63	7.85	7.23	7.36	7.32	7.5	7.32	7.44	7.26	7.54	7.22	7.21	7.26	7.2	7.26	7.24	7.28	7.32	7.43	7.28	7.26	7.29	7.29	7.07	7.36	7.26	7.33	7.2	7.24	7.24	7.24	7.27	7.42	7.38	7.4	7.32	7.36	7.22	7.17
09X4mEul0cT5Upy34E	7.3	7.49	7.51	7.72	7.74	7.3	7.4	7.55	7.47	7.39	7.3	7.39	7.43	7.78	7.64	7.46	7.83	7.79	7.63	7.18	7.31	7.34	7.35	7.27	7.2	7.61	7.53	7.73	7.61	7.46	7.4	7.6	7.39	7.95	7.35	7.29	7.54	7.62	7.58	7.8	7.46	7.57	7.53	7.74	7.32	8.07	7.92	7.35	7.57
09X5FBAxPYA73uJ50I	7.24	7.43	7.2	7.15	7.24	7.19	7.18	7.31	7.49	7.6	7.28	7.32	7.11	7.15	7.39	7.74	7.41	7.41	7.17	7.18	7.2	7.19	7.16	7.14	7.13	7.1	7.19	7.07	7.19	7.11	7.12	7.12	7.1	7.18	7.22	7.18	7.28	7.12	7.12	7.13	7.12	7.19	7.16	7.35	7.53	7.14	7.11	7.16	7.25
09X5qg.014rkuupy0U	7.43	7.24	7.92	7.8	7.45	7.26	7.33	7.28	7.82	7.42	7.3	7.56	7.63	7.21	7.34	7.77	7.36	7.23	7.21	7.94	7.79	7.17	7.18	7.13	7.18	7.32	7.56	8.2	7.19	7.56	7.29	8.43	7.2	7.81	7.96	8.36	7.61	7.9	7.73	7.36	7.88	7.49	7.48	7.18	7.46	7.23	7.15	7.36	7.37
09ynL963zT4vEny448	7.21	7.24	7.25	7.18	7.22	7.19	7.28	7.21	7.2	7.19	7.18	7.23	7.2	7.15	7.18	7.12	7.17	7.94	7.36	7.22	7.37	7.22	7.21	7.3	7.3	7.09	7.09	7.31	7.3	7.23	7.2	7.21	7.22	7.31	7.13	7.42	7.16	7.24	7.19	7.24	7.22	7.18	7.15	7.2	7.2	7.32	7.36	7.24	7.18
0_1P2qgH6leUKpIn4U	7.37	7.29	7.28	7.32	7.35	7.41	7.36	7.35	7.38	7.35	7.27	7.31	7.27	7.4	7.38	7.36	7.36	7.29	7.37	7.32	7.21	7.21	7.32	7.2	7.2	7.27	7.27	7.37	7.4	7.42	7.43	7.3	7.38	7.31	7.34	7.22	7.28	7.27	7.4	7.27	7.32	7.35	7.31	7.33	7.31	7.36	7.29	7.35	7.36
0_9dKJSRdZ6nRKsR5o	7.07	7.14	7.21	7.08	7.18	7.17	7.16	7.17	7.14	7.18	7.11	7.12	7.23	7.14	7.17	7.16	7.12	7.22	7.15	7.18	7.19	7.21	7.19	7.16	7.18	7.14	7.15	7.14	7.17	7.1	7.16	7.19	7.2	7.18	7.1	7.17	7.18	7.22	7.24	7.21	7.14	7.12	7.15	7.14	7.23	7.17	7.17	7.13	7.16
0_9Zd7UXqV4FRJ5XdE	7.24	7.23	7.23	7.25	7.22	7.16	7.26	7.19	7.3	7.3	7.27	7.26	7.27	7.2	7.2	7.3	7.29	7.37	7.2	7.27	7.18	7.17	7.18	7.16	7.17	7.22	7.16	7.16	7.16	7.13	7.15	7.22	7.16	7.19	7.18	7.22	7.26	7.26	7.2	7.17	7.13	7.15	7.26	7.21	7.33	7.24	7.16	7.16	7.15
0_CoxIt3fv09UVwOo0	7.15	7.16	7.19	7.19	7.13	7.1	7.11	7.15	7.13	7.16	7.14	7.16	7.17	7.16	7.22	7.25	7.18	7.14	7.2	7.18	7.2	7.15	7.2	7.17	7.22	7.15	7.11	7.2	7.18	7.22	7.15	7.23	7.16	7.2	7.17	7.17	7.13	7.13	7.09	7.18	7.11	7.13	7.19	7.15	7.11	7.19	7.18	7.14	7.1
0_DHz7_krTURH3lVHk	10.41	9.5	9.84	10.13	10.23	10.25	11.31	11.34	9.99	9.36	11.32	10.75	11.1	10.32	10.28	10.63	10.61	9.48	10.9	10.45	11.44	12.92	12.18	12.09	12.68	10.9	11.78	10.42	12.63	11.78	10.05	10.93	11.89	11.44	10.94	11.99	12.11	11.77	11.93	12.1	10.79	11.03	9.62	10	8.48	12.39	11.3	11.31	11.88
0_FepinhRBRzoxWR10	7.27	7.74	7.35	7.3	7.67	7.37	7.26	7.63	7.32	7.25	7.51	7.54	7.43	7.62	7.45	7.4	7.35	7.59	7.57	7.46	7.5	7.65	7.26	7.26	7.41	7.32	7.3	7.26	7.46	7.26	7.88	7.48	7.55	7.52	7.26	7.32	7.38	7.24	7.34	7.58	7.62	7.42	7.49	7.31	7.76	7.32	7.61	7.43	8.05
0_I5BIgbOUTJV5ggCk	7.23	7.14	7.14	7.22	7.19	7.17	7.13	7.14	7.25	7.2	7.18	7.25	7.13	7.24	7.17	7.2	7.18	7.2	7.24	7.21	7.22	7.2	7.22	7.18	7.21	7.16	7.22	7.21	7.22	7.19	7.17	7.17	7.15	7.13	7.24	7.2	7.17	7.11	7.2	7.2	7.25	7.12	7.18	7.21	7.19	7.18	7.18	7.18	7.18
0_iLnqy67UxOd.vq44	7.24	7.22	7.19	7.3	7.19	7.2	7.22	7.17	7.23	7.18	7.24	7.25	7.24	7.14	7.19	7.21	7.23	7.21	7.32	7.26	7.28	7.19	7.28	7.19	7.33	7.2	7.25	7.21	7.21	7.19	7.19	7.09	7.18	7.2	7.14	7.17	7.17	7.24	7.19	7.15	7.21	7.18	7.31	7.16	7.33	7.27	7.19	7.18	7.17
0_IoB6iKWi5h_qLfJc	7.28	7.32	7.29	7.24	7.29	7.33	7.32	7.37	7.37	7.31	7.29	7.36	7.34	7.3	7.33	7.3	7.3	7.27	7.21	7.25	7.21	7.22	7.19	7.18	7.19	7.33	7.27	7.35	7.49	7.24	7.28	7.32	7.37	7.34	7.35	7.22	7.35	7.33	7.31	7.27	7.32	7.28	7.31	7.34	7.34	7.27	7.22	7.31	7.35
0_Jp3l3uupucJXu1Xw	7.23	7.2	7.21	7.16	7.25	7.19	7.19	7.3	7.15	7.15	7.21	7.16	7.17	7.17	7.22	7.2	7.15	7.29	7.2	7.2	7.2	7.2	7.46	7.18	7.2	7.21	7.15	7.22	7.22	7.21	7.19	7.22	7.15	7.22	7.17	7.12	7.3	7.17	7.24	7.26	7.25	7.15	7.14	7.19	7.15	7.31	7.19	7.33	7.24
0_N515ViqJcAlAlG30	7.36	7.3	7.25	7.33	7.33	7.38	7.26	7.29	7.34	7.29	7.47	7.32	7.26	7.29	7.4	7.26	7.33	7.34	7.23	7.19	7.22	7.16	7.17	7.2	7.2	7.32	7.37	7.32	7.17	7.41	7.37	7.4	7.34	7.29	7.3	7.13	7.29	7.32	7.38	7.4	7.32	7.28	7.2	7.2	7.34	7.17	7.3	7.38	7.22
0_qAhAie1eKl7IyeXU	8.1	7.96	8.17	8.6	7.92	7.85	7.82	7.68	8.17	8.65	8.05	8.03	7.77	7.95	8.19	7.87	7.88	7.77	7.98	8.99	8.34	8.53	8.72	8.86	8.25	8.2	7.91	8.86	8.14	8.49	8.94	8.7	8.11	8.34	8.06	8.12	7.82	8.22	8.54	8.08	8.4	7.79	8.39	8.09	8.04	8.45	7.82	8.03	8.9
0_QLpGXoiB_gnUZV9w	8.35	7.94	7.98	8.06	7.81	7.59	7.86	8.11	8.71	8.15	8.17	8.48	8.03	7.9	8.13	7.85	7.67	8.14	7.9	8.19	8.18	8.33	8.2	8.6	8.47	8.64	7.89	8.2	8.5	8.28	8.22	8.16	8.28	8.29	8.19	8.17	8.01	8.17	8.48	7.99	8.35	8.11	8.43	8.11	8.28	7.94	8.66	8.33	8.32
0_RCXX9nqFNRgu2oEU	7.21	7.19	7.27	7.16	7.17	7.24	7.22	7.2	7.13	7.16	7.19	7.24	7.15	7.2	7.16	7.19	7.17	7.24	7.2	7.2	7.2	7.31	7.26	7.36	7.2	7.19	7.18	7.17	7.23	7.21	7.21	7.21	7.18	7.27	7.17	7.24	7.19	7.13	7.25	7.15	7.17	7.23	7.13	7.2	7.17	7.24	7.22	7.1	7.16
0_RR6AQNFKMCS3enqU	7.17	7.12	7.16	7.16	7.13	7.19	7.16	7.21	7.23	7.18	7.15	7.16	7.17	7.25	7.16	7.16	7.17	7.17	7.22	7.23	7.22	7.2	7.18	7.22	7.2	7.14	7.13	7.14	7.18	7.21	7.14	7.16	7.18	7.21	7.21	7.19	7.15	7.11	7.14	7.14	7.14	7.1	7.14	7.16	7.12	7.21	7.24	7.17	7.22
0_TEsAQwfenM.sgTfw	7.18	7.17	7.18	7.21	7.21	7.16	7.15	7.19	7.15	7.19	7.15	7.12	7.23	7.26	7.23	7.13	7.16	7.12	7.21	7.18	7.22	7.2	7.19	7.16	7.16	7.2	7.17	7.2	7.19	7.2	7.19	7.22	7.24	7.22	7.17	7.18	7.19	7.27	7.16	7.17	7.19	7.28	7.17	7.19	7.16	7.16	7.18	7.21	7.2
0_VCOWrh11WqHdUd6g	7.17	7.19	7.25	7.28	7.15	7.14	7.18	7.18	7.16	7.24	7.2	7.2	7.14	7.23	7.21	7.17	7.22	7.26	7.21	7.24	7.18	7.2	7.19	7.16	7.18	7.27	7.2	7.14	7.22	7.12	7.21	7.2	7.19	7.22	7.19	7.2	7.15	7.22	7.2	7.13	7.28	7.17	7.17	7.19	7.14	7.28	7.19	7.17	7.12
0_WFiq6EEf_SOJ66J0	10.58	12.16	10.84	10.58	11.31	10.46	10.7	10.62	10.95	11.36	11.87	11.37	10.58	12.54	11.93	10.74	10.89	10.6	11.08	11.19	10.74	10.5	11.05	10.92	10.29	11.43	10.5	12.23	11.22	11.25	12.08	11.9	11.26	10.54	10.66	11.58	10.52	11.02	11.1	11.12	10.76	11.01	11.17	11	10.81	11.5	11.42	11.34	12.23
0_X5Lfux56cXet7uUs	7.14	7.13	7.12	7.21	7.11	7.16	7.07	7.23	7.13	7.1	7.17	7.18	7.24	7.14	7.16	7.1	7.12	7.18	7.23	7.26	7.19	7.18	7.19	7.18	7.2	7.13	7.08	7.11	7.21	7.15	7.16	7.07	7.12	7.11	7.14	7.23	7.16	7.1	7.22	7.15	7.08	7.08	7.02	7.06	7.17	7.23	7.24	7.14	7.07
0_XrX7f5Xeen1X0XSQ	7.88	7.8	7.62	7.67	8.06	7.98	8.19	8.58	8.05	8.2	8	8.24	8.26	7.93	7.98	8	7.94	7.77	8.51	8.55	8.34	8.15	8.95	8.75	8.28	8.45	8	7.88	8.61	8.33	8.06	8.37	8.38	8.56	8.02	8.53	8.72	8.3	8.41	8.51	8.51	9.23	8.24	8.05	7.5	8.68	8.47	8.65	8.77
0A3XgAigp80pHQJRUo	7.26	7.32	7.25	7.19	7.26	7.22	7.23	7.22	7.39	7.21	7.24	7.27	7.26	7.32	7.21	7.26	7.18	7.21	7.25	7.36	7.26	7.28	7.3	7.25	7.22	7.21	7.34	7.33	7.27	7.26	7.27	7.22	7.24	7.28	7.32	7.24	7.23	7.3	7.22	7.24	7.29	7.24	7.26	7.26	7.3	7.32	7.28	7.31	7.28
0A4Ud3IOfVKtLq6PCU	7.15	7.1	7.13	7.09	7.13	7.14	7.17	7.15	7.16	7.2	7.18	7.19	7.18	7.18	7.14	7.14	7.19	7.13	7.15	7.17	7.16	7.11	7.12	7.08	7.11	7.15	7.21	7.21	7.12	7.18	7.25	7.13	7.14	7.17	7.15	7.09	7.15	7.21	7.15	7.22	7.16	7.21	7.22	7.18	7.11	7.08	7.08	7.21	7.17
0a6JOcuuv0gxLf_9uI	7.19	7.14	7.16	7.14	7.16	7.13	7.1	7.19	7.14	7.18	7.15	7.13	7.1	7.25	7.11	7.21	7.14	7.2	7.2	7.18	7.22	7.2	7.21	7.2	7.17	7.11	7.14	7.12	7.26	7.16	7.17	7.13	7.1	7.17	7.13	7.23	7.11	7.08	7.12	7.14	7.2	7.18	7.18	7.1	7.19	7.21	7.21	7.11	7.1
0a7sqouuT0.jrFCgkk	8.62	9.18	8.81	9.91	9.73	9.59	8.59	8.58	9.72	9.87	9.16	10.52	8.48	11.31	9.66	9.04	8.86	8.48	9.11	8.66	8.5	8.06	8.32	8.67	8.1	9.29	9.32	9.23	9.12	8.62	9.15	9.11	9.12	9.13	9.08	9.1	9.07	8.87	9.39	8.33	8.67	9.09	10.79	10.39	10.94	8.96	10.56	9.05	9.91
0a94RexWRVEXZu53.M	7.2	7.24	7.2	7.2	7.19	7.24	7.21	7.2	7.19	7.24	7.17	7.2	7.21	7.19	7.19	7.16	7.24	7.29	7.3	7.32	7.33	7.42	7.5	7.41	7.48	7.19	7.3	7.19	7.4	7.26	7.18	7.17	7.2	7.21	7.15	7.23	7.23	7.22	7.17	7.22	7.16	7.15	7.22	7.22	7.33	7.25	7.21	7.18	7.24
0AAz8PQ6wvzsDNIg.M	7.09	7.09	7.11	7.03	7.17	7.09	7.09	7.12	7.05	7.1	7.06	7.08	7.1	7.06	7.1	7.13	7.02	7.05	7.11	7.15	7.15	7.05	7.07	7.1	7.05	7.06	7.08	7.06	7.09	7.08	7.13	6.97	7.07	7.03	7.06	7.08	7.05	7.14	7.02	7.1	7.06	7.1	7.11	7.03	7.03	7.06	7.06	7.05	7.05
0AbxLvWOIRLKSx_oq0	7.21	7.17	7.21	7.2	7.13	7.21	7.18	7.11	7.2	7.25	7.18	7.16	7.14	7.1	7.15	7.23	7.19	7.21	7.17	7.17	7.18	7.19	7.15	7.16	7.17	7.1	7.16	7.18	7.18	7.13	7.24	7.13	7.14	7.22	7.08	7.17	7.12	7.16	7.13	7.13	7.25	7.26	7.21	7.17	7.25	7.17	7.15	7.14	7.18
0AE56hA56DV9ajXqYo	7.56	7.48	7.64	7.61	7.68	7.7	7.6	7.58	7.56	7.6	7.43	7.52	7.61	7.56	7.46	7.51	7.57	7.57	7.75	7.58	7.41	7.44	7.79	7.7	7.37	7.74	7.51	7.67	7.76	7.53	7.57	7.65	8.09	7.57	7.52	7.53	7.58	7.62	7.51	7.6	7.75	7.61	7.64	7.61	7.38	7.72	7.56	7.62	7.62
0AFDiONKnCBLDSv9RM	7.13	7.14	7.14	7.13	7.06	7.07	7.16	7.12	7.15	7.09	7.18	7.1	7.16	7.12	7.13	7.16	7.15	7.14	7.15	7.17	7.16	7.17	7.15	7.17	7.17	7.13	7.19	7.13	7.18	7.08	7.09	7.18	7.09	7.14	7.11	7.15	7.13	7.1	7.13	7.18	7.14	7.14	7.05	7.11	7.17	7.18	7.16	7.14	7.17
0Ag5YaKlfpeSORXXo4	7.23	7.23	7.27	7.14	7.27	7.53	7.23	7.36	7.29	7.2	7.17	7.51	7.28	7.19	7.28	7.14	7.33	7.19	8.55	7.21	7.23	7.15	7.19	7.16	7.17	7.5	7.54	7.57	7.2	7.34	7.51	7.34	7.39	7.24	7.33	7.28	7.38	7.41	7.81	7.36	7.72	7.34	7.23	7.15	7.22	7.53	7.51	7.28	7.21
0ag7JCLSsndD1Pd4C0	7.12	7.11	7.07	7.07	7.11	7.1	7.13	7.15	7.12	7.11	7.12	7.08	7.17	7.09	7.12	7.18	7.12	7.11	7.09	7.14	7.16	7.1	7.1	7.02	7.04	7.13	7.12	7.06	7.11	7.08	7.17	7.09	7.11	7.07	7.23	7.09	7.1	7.06	7.17	7.07	7.09	7.09	7.04	7.09	7.14	7.06	7.11	7.18	7.16
0ahBqlaeKKJn5nepf8	7.27	7.31	7.29	7.26	7.2	7.29	7.28	7.31	7.28	7.25	7.26	7.2	7.21	7.27	7.33	7.2	7.29	7.27	7.27	7.41	7.22	7.45	7.53	7.42	7.34	7.34	7.18	7.28	7.24	7.38	7.36	7.35	7.34	7.37	7.2	7.25	7.24	7.28	7.29	7.29	7.34	7.29	7.23	7.21	7.17	7.31	7.26	7.36	7.27
0AiQhGUdZfQZQJqjec	7.38	7.35	7.29	7.33	8.9	7.25	7.24	7.35	7.36	7.27	7.38	7.22	7.36	7.21	7.41	7.31	7.25	8.67	7.35	7.32	7.23	7.24	7.22	7.24	7.29	7.28	7.28	7.19	7.21	7.27	7.35	7.26	7.2	7.24	7.31	7.33	7.25	7.22	7.3	8.34	7.41	7.36	7.29	7.37	7.39	7.24	7.32	7.39	7.28
0aj4oK1kSXt3nS_QwE	11.79	11.23	11.33	11.8	11.52	13.13	11.9	12.1	11.67	11.91	12.03	12.07	11.54	13.24	12.79	12.08	11.87	12.97	12.38	11.39	12.6	12.67	12.09	12.24	12.56	12.69	11.89	11.44	12.17	11.83	12.25	12.5	12.25	12.13	12.39	12.02	11.44	12.91	11.78	12.2	12.52	11.37	12.07	11.92	10.97	12.16	12.03	13.16	12.08
0aj6cfwvSLOSEh51a4	7.17	7.19	7.22	7.18	7.21	7.15	7.18	7.14	7.21	7.15	7.22	7.2	7.16	7.21	7.22	7.2	7.21	7.24	7.43	7.3	7.35	7.31	7.35	7.51	7.37	7.15	7.18	7.21	7.26	7.15	7.2	7.18	7.18	7.3	7.22	7.32	7.21	7.15	7.15	7.26	7.22	7.2	7.16	7.21	7.14	7.42	7.3	7.14	7.17
0aJGgkREJ384Ped1NI	7.36	7.34	7.26	7.44	7.21	7.3	7.37	7.27	7.39	7.24	7.3	7.25	7.28	7.18	7.35	7.26	7.49	7.23	7.22	7.19	7.22	7.2	7.23	7.18	7.2	7.26	7.32	7.21	7.28	7.2	7.22	7.21	7.26	7.2	7.25	7.22	7.26	7.34	7.25	7.22	7.28	7.25	7.29	7.27	7.82	7.22	7.28	7.18	7.26
0AknqCouqjF56Ke7ns	7.29	7.33	7.22	7.2	7.36	7.3	7.31	7.27	7.33	7.27	7.32	7.27	7.38	7.24	7.29	7.27	7.24	7.3	7.25	7.25	7.21	7.18	7.19	7.17	7.19	7.26	7.28	7.36	7.18	7.45	7.34	7.33	7.37	7.22	7.48	7.26	7.28	7.25	7.32	7.37	7.31	7.3	7.23	7.3	7.3	7.2	7.24	7.34	7.24
0AkSpC3QNSkUDXCQiU	7.32	7.27	7.21	7.2	7.23	7.21	7.26	7.3	7.26	7.27	7.26	7.37	7.23	7.23	7.27	7.25	7.25	7.38	7.22	7.23	7.22	7.19	7.19	7.2	7.19	7.22	7.34	7.23	7.26	7.25	7.36	7.26	7.26	7.23	7.34	7.22	7.3	7.26	7.24	7.28	7.26	7.29	7.39	7.28	7.26	7.26	7.29	7.22	7.28
0aKUI4qEJMIKKaB4aI	8.11	8.1	7.97	8.26	7.89	7.65	7.73	7.85	7.8	8.11	7.8	7.9	7.8	8.01	7.78	7.89	8.11	7.92	7.58	7.59	7.66	7.28	7.27	7.19	7.49	7.58	7.78	7.49	7.54	7.46	7.53	7.45	7.62	7.54	7.87	7.37	7.79	7.56	7.36	7.54	7.47	7.59	7.97	7.83	7.78	7.44	7.52	7.56	7.74
0Amd7dP55p5NW1LdlQ	7.29	7.31	7.25	7.32	7.24	7.2	7.31	7.26	7.29	7.28	7.39	7.44	7.32	7.33	7.32	7.29	7.29	7.38	7.29	7.26	7.28	7.39	7.35	7.59	7.31	7.33	7.28	7.26	7.27	7.24	7.3	7.33	7.36	7.3	7.33	7.32	7.29	7.29	7.29	7.28	7.24	7.32	7.3	7.3	7.33	7.29	7.3	7.34	7.39
0amhl1CFLd5dZJtJqI	7.25	7.21	7.18	7.27	7.26	7.37	7.26	7.24	7.2	7.24	7.2	7.35	7.24	7.22	7.24	7.25	7.26	7.19	7.37	7.17	7.19	7.13	7.2	7.13	7.17	7.26	7.26	7.28	7.18	7.16	7.23	7.17	7.25	7.23	7.26	7.18	7.23	7.28	7.24	7.19	7.22	7.26	7.26	7.24	7.16	7.2	7.1	7.25	7.3
0AmKRHnx5fqvuiOhW4	10.8	10.83	10.99	11.01	9.99	10.46	10.24	10.72	10.09	10.02	10.28	10.32	10.34	10.46	11.05	10.69	10.12	10.73	10.9	10.62	11.23	11.34	10.19	11.35	11.03	10.31	10.64	10.42	11.37	10.58	10.84	11.53	11.06	10.51	10.45	10.76	10.26	10.4	11.02	10.53	10.01	9.93	10.58	10.63	10.56	11	11.27	10.98	11.16
0Ao0u9eIBU3bDDtV50	7.13	7.19	7.1	7.12	7.08	7.12	7.02	7.23	7.08	7.06	7.19	7.23	7.04	7.13	7.12	7.11	7.08	7.07	7.2	7.18	7.18	7.1	7.17	7.12	7.15	7.03	7.13	7.1	7.18	7.24	7.13	7.07	7.06	7.14	7.07	7.11	7.13	7.07	7.06	7.09	7.11	7.1	7.02	7.22	7.16	7.11	7.17	7.09	7.07
0AOAx.8eI7j6zJ5P3A	7.06	7.15	7.07	7.11	7.07	7.12	7.06	7.1	7.11	7.07	7.05	7.13	7.06	7.09	7.11	7.09	7.09	7.07	7.14	7.15	7.18	7.1	7.14	7.11	7.13	7.06	7.11	7.04	7.13	7.11	7.16	7.01	7.1	7.07	7.14	7.08	7.07	7.03	7.09	7.07	7.16	7.09	7	7.05	7.07	7.08	7.14	7.09	7.02
0aorgCuEqJ5dd0Ikvo	7.39	7.4	7.43	7.49	7.37	7.46	7.4	7.44	7.44	7.32	7.5	7.4	7.38	7.29	7.41	7.39	7.34	7.43	7.62	7.79	7.57	7.7	7.66	7.58	7.76	7.5	7.33	7.41	7.48	7.44	7.53	7.49	7.48	7.45	7.32	7.4	7.37	7.44	7.49	7.41	7.5	7.42	7.34	7.29	7.36	7.34	7.56	7.36	7.33
0AOxET31QpKbP3eiF0	7.26	7.37	7.26	7.27	7.34	7.29	7.35	7.32	7.33	7.23	7.24	7.24	7.29	7.39	7.31	7.22	7.21	7.29	7.24	7.2	7.31	7.24	7.34	7.18	7.28	7.26	7.34	7.31	7.23	7.34	7.29	7.33	7.28	7.28	7.26	7.33	7.27	7.41	7.32	7.3	7.36	7.24	7.24	7.29	7.31	7.3	7.36	7.35	7.36
0ap5HlFepB9lClF.jk	14.67	14.65	14.58	14.87	14.34	14.61	14.67	14.62	13.96	14.32	14.48	14.41	14.84	14.65	14.49	14.61	14.6	14.44	15.2	14.66	14.85	15	14.39	14.75	14.52	15.05	14.28	14.88	14.83	14.94	14.93	14.84	15.22	14.96	14.11	14.88	14.39	14.39	14.94	15.12	15.09	14.58	14.4	14.28	14.5	14.65	15.06	14.69	13.9
0APRqEqmgzGXPJf9FE	7.17	7.17	7.14	7.17	7.18	7.24	7.21	7.21	7.13	7.11	7.14	7.04	7.15	7.08	7.15	7.13	7.19	7.11	7.12	7.16	7.18	7.11	7.1	7.13	7.12	7.2	7.12	7.21	7.14	7.25	7.16	7.2	7.25	7.14	7.16	7.12	7.15	7.2	7.18	7.21	7.26	7.1	7.14	7.19	7.15	7.11	7.13	7.18	7.15
0aQhUvKSiWouOoA4HI	7.26	7.32	7.22	7.25	7.3	7.32	7.4	7.27	7.23	7.28	7.25	7.17	7.28	7.23	7.2	7.28	7.31	7.29	7.31	7.36	7.31	7.19	7.19	7.17	7.19	7.18	7.29	7.23	7.25	7.22	7.23	7.23	7.18	7.2	7.32	7.26	7.23	7.26	7.24	7.24	7.23	7.28	7.31	7.25	7.21	7.24	7.24	7.28	7.27
0Arki9edYvolt5.pd0	7.2	7.16	7.14	7.12	7.17	7.24	7.17	7.16	7.18	7.22	7.2	7.18	7.17	7.15	7.19	7.19	7.18	7.17	7.2	7.19	7.21	7.2	7.21	7.32	7.2	7.14	7.2	7.2	7.22	7.17	7.22	7.23	7.14	7.17	7.13	7.18	7.21	7.11	7.14	7.13	7.19	7.18	7.14	7.18	7.18	7.23	7.2	7.27	7.18
0aSpikuU55f7kC_ppo	7.45	7.33	7.36	7.42	7.47	7.29	7.52	7.29	7.31	7.29	7.29	7.37	7.31	7.33	7.3	7.38	7.37	7.39	7.24	7.2	7.22	7.19	7.17	7.17	7.22	7.51	7.26	7.33	7.27	7.42	7.3	7.36	7.46	7.33	7.39	7.25	7.32	7.38	7.33	7.42	7.35	7.37	7.36	7.41	7.33	7.32	7.28	7.36	7.35
0aTqAVa3ss9e_6gBXo	7.23	7.14	7.15	7.21	7.15	7.14	7.16	7.13	7.17	7.2	7.22	7.14	7.22	7.15	7.11	7.17	7.16	7.14	7.16	7.19	7.2	7.19	7.16	7.15	7.16	7.18	7.17	7.16	7.2	7.12	7.19	7.2	7.15	7.17	7.13	7.23	7.17	7.15	7.14	7.15	7.16	7.2	7.13	7.16	7.14	7.16	7.19	7.19	7.18
0aTYCIDoDV_E3nF11U	8.3	8.16	9.05	9.01	8.26	8.41	8.48	8.42	8.62	8.97	8.28	8.24	8.52	8.8	8.55	8.73	8.08	9.03	8.55	7.93	9.29	7.28	7.8	7.73	7.82	8.58	8.75	8.3	7.93	8.11	8.73	8.24	9.36	8.74	8.83	7.99	7.94	8.51	8.57	8.24	8.65	8.22	8.44	8.92	8.66	8.47	7.99	8.11	7.75
0AUherld3FGqg_Uf4U	7.31	7.28	7.24	7.36	7.25	7.3	7.33	7.35	7.32	7.29	7.24	7.29	7.27	7.26	7.3	7.27	7.3	7.32	7.27	7.27	7.28	7.31	7.25	7.19	7.24	7.38	7.21	7.39	7.26	7.35	7.26	7.29	7.35	7.26	7.25	7.23	7.26	7.32	7.28	7.38	7.3	7.23	7.28	7.29	7.28	7.25	7.3	7.31	7.23
0Aul6ne_u5u9bpoiCA	10.49	10	9.51	8.72	11.57	9.95	9.99	9.15	10.18	10.77	11.07	9.09	10.59	8.47	11.25	10.5	9.32	11.17	9.72	10.97	10.85	10.49	10.38	9.49	10.72	11.05	10.36	10.72	9.69	10.59	10.08	11.33	11.26	9.78	11	10.46	10.62	11.58	9.44	10.49	11.35	10.02	10.06	8.26	10.61	9.91	11.36	10.16	10.52
0aulohWqkeeqPU0oKA	7.51	7.42	7.47	7.39	7.43	7.37	7.34	7.44	7.42	7.39	7.52	7.33	7.52	7.34	7.35	7.33	7.45	7.36	7.53	7.49	7.58	7.56	7.73	7.69	7.54	7.59	7.5	7.51	7.37	7.48	7.54	7.49	7.46	7.48	7.41	7.44	7.32	7.4	7.49	7.46	7.48	7.34	7.3	7.45	7.36	7.37	7.49	7.53	7.34
0aW3XHCpH3Ho0rn3Tc	7.09	7.16	7.18	7.2	7.17	7.15	7.19	7.14	7.19	7.18	7.09	7.14	7.15	7.1	7.15	7.19	7.13	7.17	7.21	7.19	7.23	7.21	7.16	7.23	7.21	7.18	7.16	7.15	7.19	7.2	7.13	7.15	7.14	7.21	7.12	7.22	7.22	7.15	7.18	7.11	7.14	7.12	7.15	7.14	7.18	7.12	7.17	7.12	7.27
0AWSk9IUMuPpTpJJoo	7.06	7.14	7.1	7.19	7.24	7.18	7.16	7.15	7.19	7.13	7.21	7.22	7.16	7.22	7.1	7.11	7.15	7.18	7.15	7.17	7.18	7.14	7.11	7.17	7.15	7.14	7.07	7.14	7.2	7.15	7.16	7.12	7.1	7.1	7.12	7.13	7.15	7.09	7.11	7.17	7.13	7.2	7.17	7.12	7.2	7.17	7.15	7.17	7.16
0aZXcBf5XN7_RC_S7k	10.82	11	10.36	11.27	10.91	12.02	11.29	11.16	11.42	10.08	10.64	10.83	10.42	11.82	11.07	10.6	11.01	10.55	11.73	11.06	11.61	11.05	11.52	11.48	11.04	11.06	10.93	11.05	10.91	10.88	11.47	11.05	11.23	11.25	10.72	11.3	10.58	10.91	11.36	11.28	11.02	11.23	10.39	10.72	11.09	11.16	11.93	11.15	11.04
0b089IR2l99ap76XtU	7.2	7.2	7.28	7.23	7.23	7.27	7.29	7.27	7.29	7.26	7.2	7.24	7.23	7.21	7.2	7.22	7.21	7.28	7.29	7.29	7.22	7.21	7.29	7.18	7.28	7.19	7.25	7.2	7.27	7.27	7.31	7.29	7.23	7.26	7.21	7.28	7.23	7.28	7.2	7.29	7.25	7.21	7.18	7.3	7.24	7.17	7.22	7.26	7.18
0B5HqEiISoKJyqSgoE	7.4	7.41	7.38	7.28	7.37	7.43	7.33	7.32	7.32	7.33	7.29	7.31	7.35	7.32	7.39	7.37	7.39	7.35	7.42	7.33	7.3	7.28	7.38	7.67	7.28	7.34	7.31	7.38	7.3	7.33	7.42	7.38	7.37	7.31	7.38	7.37	7.36	7.36	7.33	7.44	7.41	7.31	7.38	7.29	7.24	7.33	7.26	7.41	7.37
0b5RysoRoI4Uvd6qLA	7.41	7.35	7.34	7.29	7.37	7.34	7.24	7.32	7.39	7.3	7.41	7.37	7.41	7.29	7.32	7.26	7.3	7.29	7.44	7.55	7.44	7.31	7.61	7.56	7.61	7.47	7.41	7.48	7.43	7.55	7.54	7.41	7.32	7.45	7.29	7.41	7.34	7.33	7.34	7.43	7.4	7.31	7.37	7.42	7.27	7.34	7.4	7.36	7.29
0b6677Tu96FNDolxD0	8.01	8.01	8.31	8.03	8.35	8.04	7.79	7.84	8.3	8.12	8.56	8.44	8.09	8.63	8.23	7.96	8.1	7.69	8.34	8.3	8.08	7.72	8.1	7.28	8.12	8.71	8.04	8.72	8.6	8.33	8.3	9.35	8.78	8.04	8.49	8.44	8.35	8.37	8.12	8.34	8.14	8.38	8.78	8.41	8.08	8.71	8.24	8.31	8.6
0b_n6o4A9w9yLsrDlc	7.23	7.28	7.24	7.26	7.18	7.32	7.29	7.26	7.23	7.27	7.18	7.19	7.27	7.26	7.2	7.26	7.32	7.21	7.31	7.21	7.23	7.22	7.2	7.18	7.21	7.26	7.29	7.28	7.28	7.21	7.25	7.37	7.25	7.29	7.22	7.24	7.25	7.22	7.2	7.29	7.24	7.3	7.31	7.23	7.26	7.22	7.3	7.24	7.19
0BCvetDdsAeIp4VAoo	7.21	7.28	7.27	7.23	7.24	7.25	7.25	7.3	7.28	7.22	7.2	7.17	7.28	7.25	7.2	7.22	7.2	7.21	7.22	7.21	7.23	7.35	7.31	7.26	7.34	7.29	7.34	7.25	7.3	7.21	7.22	7.25	7.33	7.25	7.27	7.33	7.22	7.38	7.23	7.26	7.23	7.21	7.29	7.2	7.33	7.22	7.29	7.28	7.32
0BD6dW67ysklKnul_4	7.16	7.1	7.12	7.1	7.14	7.1	7.16	7.12	7.12	7.11	7.15	7.19	7.2	7.15	7.13	7.13	7.15	7.18	7.21	7.19	7.21	7.17	7.16	7.18	7.16	7.11	7.14	7.1	7.17	7.14	7.18	7.07	7.11	7.11	7.16	7.17	7.17	7.07	7.1	7.19	7.1	7.12	7.1	7.1	7.15	7.28	7.12	7.1	7.15
0Bdap7hAKCuOiijCaY	7.47	7.42	7.41	7.3	7.47	7.45	7.41	7.46	7.43	7.38	7.38	7.5	7.44	7.44	7.41	7.35	7.42	7.44	7.5	7.29	7.41	7.25	7.23	7.18	7.29	7.37	7.4	7.37	7.23	7.34	7.42	7.49	7.39	7.35	7.5	7.34	7.39	7.4	7.36	7.37	7.54	7.38	7.5	7.46	7.48	7.34	7.21	7.37	7.36
0bECSHlZA2FrrAkVKA	13.04	13.17	13.75	12.79	13.12	12.86	13.37	12.8	13.24	13.62	13.07	13.04	13.34	13.68	13.27	13.42	13.34	13.6	13.62	13.52	13.89	13.15	13.48	13.12	13.17	13.69	12.94	13.54	13.33	13.44	13.15	13.6	13.27	13.18	13.26	13.55	13.36	13.14	13.13	13.6	13.3	13.51	13.33	13.26	13.1	13.41	13.51	13.06	12.84
0BFYhooiAiD.GUUVFE	7.18	7.18	7.19	7.13	7.16	7.12	7.15	7.16	7.13	7.19	7.2	7.21	7.17	7.17	7.14	7.23	7.19	7.28	7.26	7.26	7.23	7.19	7.19	7.18	7.21	7.13	7.16	7.19	7.21	7.15	7.2	7.17	7.14	7.17	7.19	7.18	7.17	7.22	7.14	7.14	7.12	7.18	7.16	7.23	7.14	7.19	7.29	7.17	7.13
0bhgiKKg6ipUugFi38	7.28	7.17	7.29	7.22	7.3	7.27	7.22	7.28	7.24	7.24	7.24	7.29	7.27	7.24	7.21	7.28	7.32	7.28	7.29	7.3	7.21	7.2	7.21	7.27	7.2	7.26	7.32	7.26	7.26	7.25	7.25	7.19	7.29	7.21	7.27	7.27	7.24	7.22	7.28	7.29	7.23	7.22	7.19	7.27	7.19	7.34	7.23	7.28	7.26
0BHiAkvUecLM7apCqU	7.29	7.33	7.16	7.29	7.31	7.31	7.33	7.4	7.33	7.39	7.36	7.26	7.32	7.2	7.38	7.42	7.29	7.24	7.25	7.19	7.25	7.29	7.21	7.16	7.19	7.3	7.22	7.26	7.2	7.26	7.29	7.24	7.22	7.39	7.4	7.22	7.25	7.32	7.24	7.3	7.29	7.32	7.3	7.28	7.27	7.24	7.23	7.29	7.28
0BIHnjVUpJKC4ooSoI	7.12	7.11	7.12	7.17	7.09	7.18	7.14	7.18	7.15	7.13	7.12	7.23	7.18	7.15	7.11	7.08	7.19	7.09	7.2	7.17	7.2	7.2	7.2	7.16	7.24	7.14	7.12	7.18	7.26	7.11	7.12	7.12	7.14	7.13	7.16	7.15	7.13	7.19	7.22	7.19	7.14	7.1	7.14	7.06	7.14	7.18	7.23	7.1	7.06
0bIrh6KzMftdF6NOeM	7.16	7.2	7.13	7.18	7.21	7.25	7.14	7.18	7.18	7.11	7.16	7.16	7.08	7.15	7.17	7.11	7.13	7.21	7.2	7.18	7.19	7.21	7.21	7.19	7.18	7.17	7.15	7.21	7.24	7.26	7.18	7.15	7.19	7.26	7.16	7.21	7.2	7.19	7.2	7.18	7.15	7.18	7.23	7.17	7.21	7.16	7.23	7.21	7.21
0bK4GJg2Cs1FJdXn4E	7.24	7.2	7.23	7.22	7.25	7.22	7.21	7.17	7.24	7.21	7.18	7.27	7.21	7.21	7.16	7.21	7.22	7.2	7.21	7.2	7.23	7.18	7.22	7.19	7.19	7.22	7.29	7.16	7.2	7.22	7.21	7.19	7.13	7.19	7.17	7.23	7.18	7.19	7.18	7.24	7.2	7.12	7.13	7.15	7.15	7.23	7.18	7.14	7.2
0BKFP_6R0pAaepAEjo	7.24	7.15	7.19	7.19	7.16	7.16	7.14	7.18	7.17	7.17	7.14	7.14	7.18	7.16	7.14	7.19	7.15	7.19	7.22	7.19	7.2	7.21	7.18	7.21	7.2	7.16	7.15	7.17	7.17	7.23	7.14	7.23	7.22	7.19	7.15	7.18	7.19	7.23	7.3	7.17	7.15	7.13	7.14	7.2	7.21	7.2	7.19	7.14	7.26
0BKT7_gdJld66ed1Uc	7.17	7.38	7.35	7.35	7.25	7.2	7.2	7.28	7.28	7.25	7.22	7.37	7.19	7.29	7.13	7.22	7.26	7.3	7.22	7.2	7.19	7.21	7.22	7.18	7.25	7.21	7.23	7.21	7.2	7.18	7.22	7.22	7.16	7.22	7.2	7.23	7.2	7.24	7.18	7.22	7.14	7.25	7.22	7.26	7.23	7.2	7.21	7.14	7.23
0BKXTl3f1AX1GXSf4o	7.25	7.28	7.19	7.17	7.25	7.27	7.16	7.21	7.2	7.19	7.23	7.34	7.26	7.22	7.29	7.2	7.3	7.24	7.3	7.42	7.24	7.32	7.33	7.28	7.27	7.22	7.21	7.23	7.26	7.14	7.27	7.21	7.22	7.17	7.22	7.26	7.18	7.24	7.17	7.18	7.19	7.3	7.22	7.19	7.23	7.36	7.27	7.16	7.16
0bnnr7qNc5eqLdO9fo	7.28	7.35	7.28	7.36	7.33	7.29	7.32	7.32	7.38	7.32	7.33	7.27	7.28	7.25	7.24	7.31	7.35	7.33	7.38	7.72	7.36	7.37	7.61	7.53	7.61	7.32	7.37	7.28	7.31	7.29	7.33	7.37	7.43	7.31	7.35	7.33	7.33	7.32	7.38	7.25	7.31	7.32	7.35	7.43	7.29	7.36	7.4	7.32	7.27
0bo8jJx7CXR5.LpO6o	8.49	8.32	8.44	8.48	8.52	8.81	8.69	8.6	8.5	8.34	8.46	8.29	8.64	8.35	8.26	8.32	8.4	8.44	8.64	8.7	8.42	8.44	8.62	8.64	8.56	8.57	8.41	8.66	8.63	8.54	8.71	8.53	8.85	8.69	8.47	8.66	8.6	8.39	8.53	8.54	8.55	8.4	8.38	8.5	8.25	8.59	8.72	8.6	8.17
0bpXgQI6dFWoqMShwE	7.14	7.17	7.22	7.23	7.17	7.2	7.22	7.21	7.23	7.23	7.31	7.22	7.2	7.12	7.18	7.19	7.2	7.17	7.3	7.19	7.22	7.19	7.2	7.19	7.26	7.19	7.2	7.2	7.15	7.21	7.18	7.21	7.16	7.21	7.24	7.18	7.15	7.16	7.17	7.21	7.21	7.15	7.14	7.15	7.18	7.16	7.19	7.25	7.13
0bqEQFUHsVXOv0gSJ4	7.3	7.39	7.3	7.34	7.33	8.38	7.37	7.28	7.38	7.9	7.44	7.35	7.29	7.42	7.22	7.6	7.38	7.27	7.4	7.96	7.24	8.02	7.67	7.76	7.56	7.77	7.54	7.32	7.65	7.47	7.88	7.59	7.46	7.8	7.44	7.42	7.3	7.49	7.51	7.49	7.52	7.46	7.28	8.32	7.4	7.46	7.34	7.76	7.54
0BqiKCNGBiSEFIikSY	7.32	7.33	7.28	7.28	7.33	7.31	7.33	7.32	7.29	7.36	7.26	7.28	7.28	7.34	7.4	7.26	7.32	7.4	7.32	7.59	7.37	7.45	7.43	7.65	7.37	7.41	7.36	7.3	7.31	7.31	7.33	7.42	7.38	7.3	7.34	7.31	7.33	7.39	7.35	7.37	7.37	7.33	7.29	7.23	7.35	7.31	7.22	7.41	7.38
0BQoKpTnquedJ7xApI	8.22	7.85	8.14	8	7.76	7.95	7.92	7.75	7.87	7.77	8.31	7.95	7.86	7.92	7.81	7.84	7.93	8.54	7.66	8.2	7.92	8.2	8.02	8.19	8.1	7.81	7.96	7.92	7.79	7.95	8.03	8.18	7.94	8.05	7.81	7.83	7.75	7.82	8	7.93	8.04	7.78	7.92	7.78	7.99	7.79	7.98	7.99	8.15
0BQUQFBSI77VQETcQE	7.37	7.4	7.47	7.39	7.36	7.55	7.5	7.35	7.41	7.42	7.45	7.33	7.39	7.46	7.41	7.37	7.42	7.42	7.65	7.75	7.59	7.8	7.76	7.9	7.59	7.42	7.46	7.53	7.49	7.46	7.56	7.5	7.5	7.57	7.44	7.49	7.41	7.52	7.43	7.5	7.57	7.43	7.34	7.39	7.52	7.52	7.55	7.55	7.43
0bRa8RYUkl4zTdQaCQ	7.27	7.37	7.56	7.18	7.26	7.2	7.55	7.21	7.31	7.29	7.14	7.16	7.41	7.24	7.29	7.21	7.66	7.07	7.73	7.2	7.73	7.2	7.18	7.25	8.22	7.21	7.24	7.22	7.26	7.29	7.18	8.18	7.37	7.15	7.22	7.25	7.27	7.19	7.2	8.29	7.34	7.41	7.26	7.27	7.91	7.35	7.25	7.27	7.23
0brIJ6cF1H1E9SVCoA	7.17	7.26	7.16	7.23	7.25	7.26	7.24	7.27	7.24	7.2	7.23	7.26	7.24	7.37	7.18	7.23	7.23	7.22	7.24	7.32	7.25	7.28	7.25	7.41	7.26	7.2	7.27	7.22	7.3	7.27	7.24	7.17	7.2	7.25	7.3	7.27	7.24	7.15	7.15	7.23	7.23	7.22	7.31	7.3	7.2	7.29	7.26	7.2	7.2
0BS0sEiEI8g9U734t0	7.19	7.27	7.2	7.25	7.22	7.17	7.26	7.27	7.21	7.25	7.18	7.25	7.23	7.14	7.15	7.15	7.14	7.24	7.2	7.38	7.23	7.32	7.26	7.32	7.23	7.21	7.14	7.27	7.3	7.25	7.16	7.22	7.24	7.25	7.15	7.19	7.22	7.23	7.22	7.29	7.26	7.22	7.22	7.18	7.23	7.28	7.2	7.17	7.25
0bt1dFXdKOiShLoK4A	7.22	7.28	7.32	7.33	7.28	7.22	7.22	7.23	7.28	7.29	7.32	7.32	7.27	7.25	7.2	7.29	7.26	7.33	7.2	7.24	7.22	7.31	7.32	7.35	7.27	7.18	7.22	7.23	7.21	7.25	7.18	7.27	7.16	7.28	7.22	7.22	7.21	7.24	7.24	7.26	7.21	7.2	7.3	7.23	7.23	7.21	7.27	7.3	7.33
0buQJXgeI.h.F_J.tI	7.23	7.23	7.21	7.28	7.15	7.18	7.27	7.21	7.21	7.2	7.2	7.18	7.2	7.18	7.2	7.17	7.16	7.17	7.3	7.55	7.24	7.22	7.43	7.58	7.29	7.25	7.17	7.22	7.24	7.19	7.18	7.22	7.32	7.19	7.16	7.29	7.15	7.23	7.19	7.26	7.19	7.21	7.23	7.28	7.25	7.35	7.29	7.23	7.27
0buU7iXv1.cS0UvRkk	7.17	7.14	7.09	7.15	7.15	7.19	7.11	7.17	7.14	7.12	7.15	7.13	7.16	7.12	7.16	7.15	7.17	7.11	7.18	7.17	7.18	7.12	7.14	7.14	7.16	7.1	7.16	7.16	7.16	7.1	7.17	7.16	7.11	7.13	7.2	7.15	7.11	7.09	7.26	7.16	7.15	7.18	7.1	7.18	7.19	7.15	7.16	7.15	7.14
0BVQ9fNXhU1HhdUXhU	7.23	7.3	7.33	7.43	7.35	7.22	7.31	7.29	7.29	7.4	7.37	7.32	7.24	7.39	7.32	7.34	7.32	7.32	7.38	7.32	7.4	7.27	7.31	7.23	7.37	7.28	7.39	7.26	7.44	7.24	7.32	7.29	7.37	7.33	7.26	7.26	7.26	7.37	7.33	7.23	7.24	7.37	7.29	7.38	7.32	7.31	7.28	7.26	7.39
0bXcbaCQhWIK7rEK7o	7.14	7.17	7.17	7.17	7.14	7.19	7.13	7.38	7.19	7.18	7.21	7.18	7.1	7.17	7.13	7.17	7.15	8.6	7.19	7.18	7.2	7.2	7.2	7.15	7.2	7.19	7.14	7.21	7.17	7.2	7.23	7.27	7.17	7.2	7.16	7.16	7.14	7.18	7.16	7.16	7.15	7.23	7.19	7.2	7.59	7.14	7.2	7.42	7.2
0C.ggFEnjpIAHSHt5A	7.98	8.65	7.87	9.57	8.26	7.23	7.64	8.63	7.74	8.49	8.37	8.95	8.29	10	8.37	9.38	9.75	7.94	7.12	7.17	7.13	7.08	7.09	7.05	7.08	7.37	8.88	7.27	7.19	7.15	7.16	7.08	7.13	7.21	8.29	7.08	9.28	7.42	7.12	7.13	7.68	8.57	9.29	8.71	10.14	7.13	7.07	7.17	8.2
0c0eiWNUi4W1c0eiWM	7.11	7.12	7.14	7.1	7.16	7.16	7.2	7.16	7.1	7.15	7.18	7.18	7.21	7.08	7.15	7.16	7.16	7.07	7.15	7.17	7.17	7.07	7.09	7.07	7.09	7.1	7.15	7.2	7.15	7.17	7.15	7.09	7.12	7.02	7.17	7.09	7.14	7.14	7.14	7.13	7.14	7.08	7.14	7.19	7.1	7.1	7.12	7.2	7.17
0c0T.MP1Fx.UNzvUFw	7.16	7.22	7.23	7.24	7.19	7.31	7.19	7.24	7.26	7.18	7.24	7.18	7.26	7.17	7.19	7.12	7.17	7.18	7.21	7.24	7.23	7.21	7.2	7.28	7.22	7.18	7.23	7.27	7.21	7.28	7.27	7.19	7.15	7.27	7.14	7.18	7.2	7.27	7.25	7.3	7.25	7.22	7.22	7.14	7.21	7.3	7.28	7.21	7.26
0C1LnhfhdIFBquVFEg	7.41	7.39	7.35	7.3	7.37	7.43	7.42	7.42	7.42	7.31	7.39	7.4	7.44	7.38	7.36	7.35	7.38	7.36	7.46	7.64	7.47	7.4	7.38	7.43	7.59	7.38	7.4	7.43	7.36	7.36	7.33	7.35	7.4	7.39	7.46	7.45	7.38	7.34	7.41	7.37	7.41	7.33	7.33	7.39	7.39	7.54	7.4	7.44	7.4
0C3Sunm7rp05ew1QT0	10.94	10.57	11.16	10.43	10.39	11.3	11.64	10.46	11.02	12.1	11.64	10.11	11.6	10.95	10.94	12.11	11.07	11.52	9.11	9.74	9.54	9.96	9.43	9.49	9.35	9.97	11.14	9.45	9.58	9.78	9.58	9.49	9.77	9.88	12.19	10.21	10.95	10.01	9.94	10.08	9.5	11.74	11.87	10.92	11.8	9.61	9.67	9.41	9.56
0c51FQuey3dB5ff_vc	7.1	7.19	7.1	7.11	7.07	7.08	7.12	7.09	7.15	7.12	7.09	7.08	7.02	7.11	7.12	7.1	7.09	7.11	7.13	7.24	7.18	7.13	7.16	7.19	7.18	7.09	7.11	7.09	7.13	7.04	7.13	6.99	7.02	7.08	7.09	7.19	7.13	7.19	7.13	7.15	7.14	7.19	7.1	7.14	7.08	7.13	7.19	7.05	7.12
0C5LX0ttbu6FKF5_ec	7.23	7.17	7.17	7.11	7.23	7.15	7.2	7.21	7.21	7.14	7.22	7.18	7.12	7.19	7.18	7.2	7.09	7.17	7.15	7.19	7.19	7.2	7.19	7.17	7.21	7.18	7.19	7.15	7.22	7.21	7.16	7.19	7.18	7.2	7.22	7.18	7.21	7.1	7.21	7.16	7.22	7.12	7.23	7.21	7.23	7.21	7.2	7.15	7.07
0c6Lo3z4L9IQ6O6rII	7.48	7.5	7.5	7.5	7.53	7.51	7.45	7.48	7.55	7.56	7.37	7.55	7.32	7.6	7.46	7.49	7.52	7.45	7.39	7.51	7.37	7.45	7.29	7.34	7.57	7.43	7.46	7.49	7.45	7.44	7.56	7.52	7.49	7.5	7.51	7.21	7.52	7.44	7.45	7.48	7.46	7.45	7.57	7.5	7.62	7.31	7.33	7.55	7.44
0CaOkkeCBCVSvUvUq0	7.67	7.84	8.29	7.83	7.92	7.62	7.61	7.75	8.22	8.1	8.27	7.98	8.08	8.07	8.05	7.91	7.86	7.66	8.76	8.48	8.25	8.19	8.12	8.25	8.28	7.92	7.87	8.42	8.21	8.08	8.02	8.88	8.32	8.01	8.07	8.23	7.89	8.23	8.03	8.05	8.39	7.91	8.11	7.77	8.05	8.42	8.43	8.15	8.25
0CBX4XqmwwI4XoVeVU	7.85	7.67	7.66	7.95	7.9	7.65	8.06	8.16	7.8	7.72	8.26	9.17	7.98	7.8	7.61	8.09	7.96	9.82	7.8	7.64	7.93	8.75	8.54	8.57	9.17	8.15	8.49	7.73	9.36	8.34	7.79	8.12	8.72	8.15	7.83	8.23	8.85	8.43	8.36	9	7.81	8.1	7.66	7.94	8.55	8.63	8.23	8.75	8.85
0CCfqLbpqrd2UVf1og	7.4	7.38	7.37	7.27	7.4	7.33	7.46	7.34	7.62	7.38	7.5	7.33	7.39	7.26	7.38	7.38	7.43	7.41	7.49	7.59	7.48	7.38	7.54	7.76	7.47	7.57	7.47	7.52	7.49	7.55	7.43	7.57	7.48	7.48	7.29	7.35	7.35	7.49	7.53	7.5	7.53	7.32	7.35	7.49	7.44	7.49	7.46	7.58	7.52
0cCksOJoOkBUp7p4oo	7.29	7.32	7.34	7.36	7.36	7.4	7.44	7.38	7.38	7.33	7.33	7.31	7.38	7.34	7.25	7.34	7.29	7.38	7.47	7.38	7.3	7.23	7.36	7.77	7.45	7.23	7.27	7.24	7.43	7.27	7.34	7.22	7.37	7.35	7.4	7.49	7.4	7.24	7.34	7.32	7.31	7.28	7.36	7.37	7.28	7.38	7.43	7.33	7.31
0CCoJ16qHqKH_RfpwI	7.33	7.3	7.27	7.33	7.3	7.39	7.29	7.33	7.3	7.33	7.29	7.32	7.31	7.34	7.37	7.31	7.26	7.3	7.55	7.65	7.5	7.67	7.63	7.84	7.78	7.34	7.34	7.45	7.51	7.36	7.39	7.46	7.42	7.34	7.3	7.48	7.28	7.33	7.41	7.44	7.38	7.31	7.28	7.32	7.39	7.47	7.55	7.39	7.3
0cCok79EunocWIn6HE	7.94	7.33	7.5	7.5	9.39	7.45	7.47	7.34	7.24	7.44	7.19	7.31	7.58	7.38	7.32	7.43	8.28	7.31	8.55	7.17	7.21	9.29	7.2	9.01	7.24	7.19	7.31	7.24	7.2	7.23	7.21	7.23	7.36	7.16	7.31	7.21	7.67	7.29	7.22	7.24	8.92	7.81	7.41	7.29	8.26	7.88	7.2	7.25	7.43
0CEAVeVEo50SlUevOo	7.24	7.19	7.28	7.19	7.29	7.24	7.2	7.22	7.19	7.24	7.26	7.21	7.21	7.26	7.19	7.24	7.26	7.23	7.2	7.19	7.2	7.18	7.18	7.16	7.19	7.22	7.16	7.21	7.17	7.22	7.17	7.13	7.17	7.18	7.25	7.2	7.23	7.19	7.15	7.22	7.26	7.22	7.26	7.19	7.28	7.23	7.19	7.19	7.24
0CeU0l4tSjh7kSCr5U	7.21	7.3	7.21	7.27	7.16	7.21	7.26	7.24	7.16	7.24	7.24	7.25	7.21	7.17	7.21	7.23	7.24	7.15	7.21	7.31	7.23	7.2	7.23	7.19	7.2	7.17	7.16	7.21	7.21	7.21	7.16	7.18	7.23	7.2	7.15	7.35	7.19	7.16	7.18	7.26	7.19	7.23	7.25	7.25	7.16	7.17	7.23	7.23	7.29
0CFNJeuNZnYpRQpd3g	7.22	7.19	7.22	7.15	7.27	7.2	7.18	7.16	7.23	7.23	7.26	7.26	7.07	7.19	7.17	7.17	7.16	7.24	7.21	7.24	7.25	7.19	7.22	7.18	7.19	7.17	7.21	7.16	7.19	7.21	7.19	7.2	7.18	7.25	7.21	7.19	7.19	7.19	7.25	7.23	7.21	7.15	7.18	7.23	7.24	7.23	7.2	7.21	7.19
0CFPxRLQzHoqU5PPT4	7.17	7.07	7.15	7.05	7.15	7.13	7.16	7.12	7.11	7.13	7.13	7.11	7.27	7.2	7.17	7.14	7.15	7.05	7.09	7.16	7.16	7.09	7.1	7.07	7.12	7.05	7.19	7.18	7.15	7.15	7.15	7.06	7.1	7.13	7.22	7.1	7.12	7.06	7.15	7.15	7.15	7.1	7.09	7.06	7.1	7.08	7.13	7.17	7.06
0CH117dqh8pNNApKuo	7.47	7.39	7.43	7.48	7.48	7.43	7.42	7.36	7.37	7.45	7.43	7.45	7.46	7.44	7.44	7.4	7.48	7.45	7.51	7.43	7.27	7.43	7.46	7.2	7.24	7.52	7.37	7.51	7.58	7.54	7.53	7.55	7.59	7.53	7.33	7.38	7.35	7.41	7.53	7.47	7.56	7.35	7.46	7.44	7.34	7.46	7.58	7.52	7.49
0chM5d4KgAST_oJLbk	7.2	7.15	7.21	7.13	7.15	7.13	7.2	7.2	7.18	7.12	7.2	7.13	7.13	7.17	7.13	7.13	7.14	7.21	7.15	7.19	7.21	7.19	7.17	7.17	7.18	7.12	7.13	7.14	7.22	7.16	7.14	7.15	7.19	7.16	7.16	7.19	7.08	7.15	7.17	7.14	7.08	7.19	7.18	7.16	7.21	7.17	7.21	7.12	7.14
0ChPHncLvEhEwsx6Ak	7.3	7.31	7.28	7.28	7.34	7.36	7.38	7.41	7.38	7.36	7.26	7.36	7.26	7.43	7.35	7.28	7.32	7.27	7.34	7.55	7.33	7.39	7.33	7.61	7.53	7.37	7.32	7.3	7.37	7.33	7.47	7.3	7.41	7.26	7.34	7.33	7.34	7.45	7.43	7.36	7.51	7.29	7.4	7.34	7.37	7.32	7.26	7.41	7.42
0chyh1Lldd1QiEClPk	10.17	10.05	9.93	9.86	9.58	9.85	9.75	10.06	9.85	9.5	9.03	9.6	9.58	9.35	9.56	9.62	10.01	9.22	10.23	10.26	9.83	9.48	9.69	9.72	10.41	10.21	9.51	9.8	10.29	10.46	10.08	10.14	9.54	9.9	9.77	9.98	9.17	9.92	10.28	9.65	10.06	9.73	9.29	9.62	9.39	9.59	10.5	9.93	9.37
0CI6rfnS0FJUp6Lkus	7.38	7.34	7.32	7.27	7.35	7.37	7.25	7.27	7.26	7.32	7.36	7.19	7.25	7.15	7.31	7.3	7.24	7.29	7.22	7.29	7.2	7.23	7.21	7.25	7.23	7.32	7.32	7.39	7.21	7.36	7.24	7.32	7.34	7.22	7.35	7.19	7.2	7.24	7.3	7.32	7.33	7.26	7.22	7.29	7.24	7.21	7.23	7.26	7.26
0cINR4euN7CdcdRKq0	8.08	7.72	7.82	7.49	7.55	7.56	7.78	7.48	7.6	7.41	7.72	7.42	7.87	7.51	7.42	7.93	7.59	7.51	7.62	7.82	7.55	7.67	7.82	8.17	7.63	7.57	7.54	7.96	7.66	7.6	7.93	7.7	7.6	7.43	7.7	7.49	7.74	7.69	7.54	7.65	7.48	7.6	7.5	7.58	7.35	7.62	7.68	7.58	7.54
0CIV_CPrt9V9RK2_qQ	7.31	7.36	7.35	7.45	7.42	7.39	7.34	7.36	7.41	7.32	7.38	7.34	7.29	7.38	7.39	7.33	7.35	7.44	7.27	7.2	7.41	7.28	7.31	7.38	7.32	7.37	7.42	7.36	7.28	7.3	7.26	7.29	7.35	7.31	7.38	7.35	7.35	7.29	7.29	7.33	7.33	7.38	7.33	7.33	7.42	7.29	7.29	7.5	7.28
0cj.FJ59fxIScO6UdI	7.2	7.17	7.14	7.22	7.19	7.11	7.2	7.16	7.18	7.16	7.25	7.14	7.21	7.19	7.17	7.13	7.17	7.2	7.24	7.19	7.21	7.21	7.2	7.18	7.2	7.18	7.19	7.18	7.18	7.21	7.22	7.22	9.17	7.18	7.15	7.19	7.16	7.17	7.2	7.23	7.27	7.37	7.13	7.27	7.12	7.17	7.25	7.24	7.25
0CjQl9d3R5KSUnTHqk	7.44	7.52	7.57	7.56	7.71	7.69	7.49	7.56	7.56	7.53	7.65	7.55	7.59	7.56	7.52	7.47	7.58	7.54	7.78	7.62	7.53	7.51	7.58	7.87	7.65	7.53	7.54	7.56	7.47	7.53	7.67	7.64	7.53	7.48	7.51	7.58	7.59	7.49	7.5	7.5	7.55	7.44	7.46	7.54	7.53	7.48	7.7	7.47	7.48
0cJXoitpl6HE0bFmi8	7.09	7.13	7.16	7.11	7.19	7.09	7.15	7.2	7.17	7.12	7.09	7.13	7.14	7.08	7.16	7.19	7.08	7.16	7.16	7.17	7.19	7.16	7.15	7.13	7.14	7.17	7.03	7.19	7.17	7.11	7.14	7.12	7.08	7.15	7.02	7.13	7.03	7.16	7.06	7.18	7.11	7.17	7.1	7.17	7.14	7.18	7.18	7.17	7.06
0CKBS_UkUV7Sc7ylXk	7.2	7.23	7.17	7.27	7.2	7.21	7.23	7.2	7.21	7.26	7.16	7.29	7.26	7.28	7.28	7.25	7.27	7.2	7.26	7.19	7.21	7.23	7.29	7.2	7.21	7.26	7.17	7.21	7.24	7.22	7.22	7.21	7.17	7.24	7.2	7.19	7.21	7.27	7.21	7.19	7.23	7.28	7.28	7.25	7.22	7.23	7.23	7.25	7.26
0CKdc.d5PfnlFKU740	7.17	7.11	7.15	7.13	7.15	7.11	7.19	7.17	7.13	7.22	7.11	7.14	7.19	7.12	7.18	7.09	7.16	7.07	7.23	7.26	7.22	7.29	7.22	7.18	7.24	7.11	7.13	7.18	7.26	7.26	7.16	7.17	7.2	7.11	7.23	7.15	7.13	7.18	7.19	7.12	7.14	7.15	7.19	7.14	7.19	7.24	7.18	7.14	7.18
0cKL9ey17Di_ldLTVY	7.32	7.61	7.24	7.15	7.28	7.3	7.16	7.27	7.21	7.23	7.14	7.15	7.28	7.31	7.05	7.19	7.25	7.93	7.54	7.97	7.27	7.18	7.66	7.1	7.19	7.7	7.39	7.29	7.59	7.88	7.22	7.33	7.08	7.11	7.32	7.18	7.23	7.27	7.51	7.08	7.14	7.29	7.58	7.39	7.12	7.39	7.15	7.34	7.35
0cLGO9C4iSS4nU7kiI	7.19	7.24	7.38	7.23	7.17	7.13	7.21	7.19	7.16	7.45	7.21	7.22	7.22	7.18	7.18	7.2	7.18	7.23	7.23	7.47	7.24	7.21	7.33	7.28	7.31	7.23	7.28	7.28	7.26	7.2	7.19	7.24	7.41	7.25	7.25	7.23	7.27	7.23	7.21	7.22	7.15	7.28	7.21	7.22	7.3	7.21	7.22	7.19	7.17
0cMC6mYiinnu79eVSU	7.58	7.44	7.74	7.69	7.95	7.44	7.48	7.59	7.54	7.5	7.56	7.63	7.62	7.53	7.46	7.66	7.43	7.46	7.6	7.78	7.83	7.28	7.53	7.24	7.91	7.8	7.43	7.96	7.65	7.5	7.78	7.57	7.62	7.52	7.4	7.41	7.41	7.45	7.51	7.5	7.56	7.49	7.7	7.5	7.52	7.63	7.44	7.71	7.46
0Cn.nvukGo54JKt2kU	7.86	7.96	8.33	7.57	8.54	7.39	7.71	7.34	7.42	8.87	7.85	8.32	7.77	8.03	7.63	7.9	7.74	7.2	7.88	8.51	8.15	7.96	8.16	7.48	8.46	8.72	7.79	8.4	8.52	8.46	8.14	8.89	8.45	7.69	7.93	8	8.16	8.19	7.75	8.07	7.96	7.58	8.61	7.39	8.06	8.13	8.73	8.1	8.56
0CNF16OiWMtC9Wqlug	7.36	7.37	7.39	7.35	7.34	7.41	7.75	7.37	7.37	7.32	7.33	7.35	7.45	7.27	7.33	7.36	7.5	7.35	7.31	7.35	7.27	7.53	7.46	7.5	7.59	7.41	7.36	7.34	7.44	7.37	7.4	7.48	7.48	7.37	7.41	7.45	7.31	7.34	7.37	7.43	7.33	7.4	7.45	7.42	7.36	7.47	7.59	7.55	7.43
0cod4OOGnqXXp_Fdzo	7.23	7.35	7.22	7.33	7.43	7.3	7.25	7.25	7.28	7.18	7.33	7.23	7.25	7.26	7.24	7.29	7.23	7.24	7.37	7.58	7.34	7.64	7.5	7.37	7.53	7.19	7.26	7.29	7.33	7.31	7.24	7.22	7.22	7.24	7.24	7.33	7.25	7.29	7.23	7.3	7.25	7.24	7.2	7.22	7.18	7.31	7.24	7.29	7.28
0connsU_TX9QEdV.U4	7.59	9.13	7.81	7.58	7.48	8.89	8.65	8.29	8.74	7.98	8.06	7.42	8.7	7.79	8.57	8.23	7.58	7.61	8.14	7.89	8.34	8.29	8.24	8.14	7.99	7.51	7.75	7.47	8.25	8.22	7.92	8.06	8.21	8.46	8.6	8.46	7.64	8.45	7.87	8.36	7.6	8.17	8.09	8.2	8.76	8.16	8.16	8.07	7.45
0cpPqg1JDgQB9eVRqk	7.23	7.31	7.23	7.2	7.31	7.24	7.26	7.24	7.29	7.27	7.24	7.22	7.15	7.16	7.35	7.25	7.27	7.38	7.27	7.26	7.28	7.2	7.22	7.18	7.19	7.21	7.26	7.31	7.19	7.25	7.35	7.28	7.29	7.21	7.25	7.4	7.24	7.18	7.25	7.24	7.28	7.21	7.23	7.22	7.24	7.32	7.19	7.37	7.29
0Cq3veS6IIT3rhSH.k	9.77	11.01	10.07	9.69	10.27	9.42	10.06	10.23	9.63	8.43	9.98	10.23	9.9	9.95	10.06	9.89	10.23	11.15	9.6	8.96	10.17	10.6	9.9	10.15	9.77	8.26	9	9.4	8.82	9.92	9.53	8.67	8.81	9.23	8.91	9.44	9.83	9.26	9.29	9.55	8.8	10.29	9.85	10.2	11.34	9.11	10.59	9.6	9.85
0cq8uXHBOyUccQoTQU	7.25	7.17	7.2	7.28	7.27	7.3	7.35	7.22	7.33	7.22	7.28	7.24	7.27	7.33	7.28	7.26	7.28	7.22	7.29	7.39	7.22	7.37	7.18	7.34	7.21	7.21	7.27	7.25	7.33	7.27	7.26	7.31	7.2	7.31	7.21	7.2	7.27	7.32	7.22	7.32	7.22	7.89	7.29	7.25	7.32	7.29	7.27	7.3	7.3
0CqA9a4M6DyCCIryCU	7.37	7.28	7.28	7.26	7.26	7.31	7.31	7.37	7.29	7.26	7.26	7.2	7.51	7.3	7.31	7.28	7.35	7.2	7.17	7.19	7.19	7.22	7.26	7.17	7.18	7.27	7.21	7.3	7.22	7.31	7.24	7.3	7.3	7.26	7.28	7.17	7.32	7.33	7.25	7.12	7.35	7.36	7.23	7.26	7.19	7.21	7.19	7.32	7.28
0Cqadaamh2iammi4Vo	8.2	8.5	8.06	7.74	8.04	7.69	8.19	7.84	7.82	8.03	7.34	7.52	7.82	7.38	7.89	7.77	8.6	7.75	8.72	7.91	7.3	7.22	7.2	7.26	8.13	7.76	7.8	7.48	7.21	7.84	8.64	7.68	8.61	7.33	7.37	8.05	7.38	7.96	8.95	7.82	7.94	7.49	7.94	8.07	7.49	7.74	7.8	8.27	8.73
0CQkQKV2JKLKXoi9Co	7.28	7.27	7.33	7.36	7.34	7.31	7.25	7.3	7.29	7.31	7.28	7.33	7.27	7.4	7.71	7.31	7.3	7.32	7.35	7.19	7.24	7.3	7.2	7.25	7.21	7.21	7.24	7.36	7.26	7.29	7.19	7.29	7.22	7.3	7.34	7.25	7.31	7.32	7.24	7.37	7.29	7.29	7.31	7.34	7.2	7.33	7.38	7.25	7.31
0cqyxCg6_oulbShw3U	7.09	7.16	7.15	7.14	7.1	7.1	7.09	7.12	7.13	7.13	7.13	7.11	7.12	7.18	7.11	7.08	7.14	7.14	7.14	7.18	7.17	7.17	7.16	7.14	7.13	7.1	7.13	7.1	7.16	7.14	7.12	7.1	7.07	7.18	7.1	7.13	7.13	7.14	7.12	7.16	7.15	7.11	7.14	7.16	7.24	7.13	7.17	7.17	7.1
0CT14T0JkYurlnunHk	8.33	8.43	8.57	8.18	8.96	8.24	8.24	8.35	8.25	8.98	8.05	8.31	8.16	9.15	8.34	8.58	8.48	7.95	8.79	9.28	8.92	8.51	10.07	8.98	10.21	10.28	8.79	8.76	9.06	9.1	9.77	9.33	9.63	8.66	9.18	9.41	9.4	8.97	8.74	8.61	8.78	8.97	9.1	10.27	8.3	9.53	8.75	9.17	9.12
0cT4f7kNXdPOz64HSI	7.23	7.38	7.2	7.41	7.07	7.21	7.26	7.28	7.22	7.46	7.22	7.21	7.33	7.5	7.33	7.45	7.33	7.17	7.22	7.22	7.2	7.26	7.31	7.18	7.22	7.14	7.25	7.16	7.29	7.18	7.19	7.2	7.18	7.22	7.52	7.22	7.31	7.36	7.17	7.15	7.2	7.47	7.79	7.26	7.62	7.3	7.27	7.2	7.28
0CtCopYKLu31Un__KU	7.1	7.13	7.13	7.15	7.15	7.18	7.2	7.14	7.21	7.11	7.09	7.11	7.22	7.16	7.11	7.09	7.14	7.1	7.18	7.17	7.2	7.16	7.1	7.16	7.14	7.21	7.11	7.16	7.15	7.15	7.18	7.16	7.17	7.12	7.18	7.1	7.13	7.16	7.07	7.17	7.12	7.13	7.13	7.12	7.1	7.13	7.13	7.17	7.18
0CU36wP1UEu4LyD19I	10.69	11.99	11.43	11.84	11.57	10.83	10.96	11.18	11.68	11.85	11.88	11.5	11.21	12.66	12.16	11.71	11.7	11.66	8.35	8.25	7.96	7.85	8.03	7.75	8.02	8.95	12.35	8.85	8.13	8.51	8.66	8.68	8.78	9.14	12.23	7.89	11.78	9.71	8.37	8.61	8.71	11.86	12.06	12.17	12.15	8.02	8.13	8.49	9.94
0CU5JedQoSopYooJE8	7.12	7.12	7.11	7.19	7.09	7.17	7.11	7.11	7.22	7.16	7.14	7.14	7.17	7.13	7.1	7.13	7.13	7.11	7.16	7.17	7.2	7.19	7.17	7.13	7.17	7.19	7.15	7.11	7.19	7.18	7.18	7.12	7.15	7.11	7.05	7.17	7.23	7.11	7.12	7.16	7.12	7.16	7.1	7.12	7.13	7.15	7.21	7.14	7.12
0cuSE4IA4yOQ7qLy3I	7.09	7.1	7.14	7.16	7.17	7.15	7.18	7.15	7.15	7.11	7.15	7.21	7.1	7.14	7.13	7.13	7.14	7.16	7.19	7.18	7.17	7.14	7.15	7.15	7.16	7.14	7.1	7.19	7.17	7.14	7.17	7.13	7.13	7.17	7.17	7.16	7.15	7.16	7.18	7.17	7.17	7.16	7.1	7.14	7.11	7.15	7.17	7.17	7.13
0CUXVlIiu06n1AL3VU	7.12	7.52	7.18	7.23	7.21	7.22	7.11	7.24	7.14	7.17	7.17	7.14	7.28	7.17	7.17	7.07	7.09	7.19	7.2	7.18	7.19	7.15	7.17	7.17	7.15	7.11	7.08	7.09	7.17	7.17	7.17	7.18	7.14	7.11	7.1	7.16	7.15	7.18	7.12	7.18	7.71	7.05	7.19	7.16	7.19	7.17	7.12	7.09	7.23
0CVF5Bd7Sy3t4N.FL0	8.02	8.93	8.02	8.02	8.38	8.99	8.7	9.4	8.58	7.91	8.33	8.42	8.63	8.43	8.79	7.88	8.27	8.23	9.53	8.96	8.46	8.04	8.92	8.51	8.54	9.07	9.18	9.31	9.01	8.73	9.14	8.94	8.87	8.6	8.7	9.05	9.16	8.77	9.36	8.84	9.19	8.7	8.38	9.28	7.97	9.18	9.21	8.93	8.85
0CWsl2oeg4HqfjS6nQ	7.1	7.11	7.18	7.21	7.13	7.07	7.11	7.05	7.12	7.09	7.18	7.08	7.04	7.13	7.14	7.1	7.09	7.07	7.18	7.18	7.25	7.2	7.19	7.18	7.19	7.18	7.07	7.2	7.21	7.2	7.2	7.09	7.23	7.15	7.14	7.22	7.23	7.15	7.15	7.19	7.16	7.11	7.13	7.06	7.2	7.13	7.21	7.15	7.09
0d.e1RQ.5_v3j9Hi_o	7.3	7.31	7.25	7.28	7.29	7.21	7.4	7.2	7.32	7.22	7.25	7.29	7.27	7.32	7.25	7.27	7.32	7.33	7.31	7.25	7.3	7.36	7.29	7.33	7.23	7.24	7.34	7.28	7.5	7.27	7.21	7.25	7.23	7.28	7.31	7.45	7.32	7.25	7.35	7.3	7.28	7.3	7.31	7.27	7.29	7.31	7.34	7.26	7.23
0D0qjuoLqimqKjfh34	7.62	7.55	7.54	7.61	7.55	7.62	7.53	7.6	7.63	7.66	7.68	7.6	7.63	7.6	7.63	7.54	7.66	7.69	7.86	8.21	7.97	8.21	8.06	8.45	8.12	7.63	7.66	7.85	8.05	7.72	7.76	7.7	7.67	7.7	7.57	7.91	7.52	7.53	7.63	7.79	7.74	7.59	7.62	7.6	7.75	7.91	8.06	7.69	7.56
0d14eKj0rX5FFHFdF4	7.31	7.58	7.65	7.3	7.26	7.21	7.28	7.36	7.32	7.48	7.23	7.2	7.42	7.41	7.39	7.41	7.23	7.25	7.26	7.58	7.26	7.65	7.48	7.77	7.54	7.33	7.36	7.32	7.38	7.39	7.3	7.24	7.27	7.39	7.45	7.59	7.24	7.44	7.28	7.63	7.31	7.49	7.42	7.2	7.51	7.52	7.43	7.31	7.3
0d1S979f4ok1UoE5eU	7.32	7.32	7.27	7.32	7.25	7.39	7.25	7.24	7.3	7.26	7.25	7.23	7.32	7.2	7.32	7.23	7.26	7.3	7.2	7.21	7.26	7.18	7.22	7.18	7.2	7.38	7.28	7.38	7.19	7.33	7.35	7.35	7.28	7.31	7.26	7.2	7.29	7.32	7.3	7.36	7.34	7.29	7.31	7.32	7.23	7.22	7.21	7.35	7.22
0d1WrVRApNCUpV20eU	7.28	7.31	7.29	7.32	7.28	7.13	7.11	7.14	7.27	7.29	7.27	7.27	7.17	7.29	7.19	7.26	7.24	7.3	7.23	7.2	7.22	7.22	7.19	7.23	7.23	7.23	7.24	7.21	7.32	7.18	7.17	7.24	7.27	7.23	7.22	7.2	7.18	7.22	7.26	7.26	7.19	7.23	7.17	7.27	7.24	7.17	7.22	7.15	7.31
0D3CJfoVi7unKvleno	9.04	8.36	8.51	8.8	8.54	8.75	9.29	7.9	8.44	8.95	8.48	8.32	8.48	8.46	8.16	8.59	8.1	8.46	8.27	8.38	8.83	8.84	8.17	9.36	8.6	9.09	8.14	8.43	8.63	8.56	8.34	8.47	8.75	9.03	8.44	8.53	8.08	8.65	8.53	9.17	8.77	8.06	8.46	7.82	8.87	8.64	8.78	8.39	8.42
0d5bp9RbVfXR9Rl7RA	7.36	7.47	7.37	7.39	7.46	7.49	7.36	7.55	7.48	7.58	7.52	7.61	7.42	7.24	7.24	7.47	7.35	7.53	7.39	7.54	7.4	7.22	7.34	7.18	7.33	7.24	7.35	7.29	7.42	7.28	7.24	7.3	7.46	7.25	7.42	7.61	7.33	7.26	7.3	7.27	7.28	7.4	7.48	7.47	7.43	7.59	7.52	7.3	7.33
0D5HTuh6hbmJ5bury0	8.18	8.43	8.23	8.15	7.8	10.07	8.59	8.47	8.36	10.04	7.91	8.67	9.09	8.83	9.35	8.42	9.2	9.27	10.19	9.81	8.98	8.49	8.21	9.12	8.56	9.98	8.12	8.51	11	8.39	9.56	9.37	7.92	8.59	9.11	9.03	7.64	9.51	9.05	8.36	9.52	7.7	8.54	8.13	10.95	8.98	9.65	10.25	8.66
0d64J4pKHouqgLrKIs	7.36	7.38	7.39	7.4	7.38	7.38	7.36	7.4	7.38	7.33	7.52	7.37	7.39	7.42	7.41	7.37	7.35	7.37	7.61	7.57	7.35	7.71	7.53	7.75	7.57	7.32	7.38	7.48	7.45	7.43	7.49	7.4	7.49	7.41	7.34	7.41	7.37	7.45	7.38	7.51	7.43	7.44	7.39	7.39	7.42	7.39	7.33	7.45	7.36
0d6LivX6v4N_leRNWw	7.23	7.23	7.17	7.3	7.23	7.2	7.23	7.28	7.27	7.33	7.22	7.31	7.17	7.31	7.21	7.26	7.3	7.32	7.23	7.19	7.2	7.21	7.34	7.26	7.16	7.16	7.28	7.18	7.29	7.29	7.18	7.22	7.17	7.24	7.33	7.21	7.28	7.24	7.29	7.27	7.27	7.3	7.37	7.22	7.38	7.22	7.38	7.21	7.24
0d70QiADFN6KsAwhfs	7.25	7.2	7.22	7.26	7.23	7.24	7.28	7.28	7.18	7.16	7.3	7.26	7.23	7.21	7.25	7.21	7.26	7.2	7.19	7.18	7.19	7.2	7.16	7.18	7.19	7.25	7.21	7.23	7.24	7.32	7.23	7.22	7.27	7.21	7.24	7.17	7.21	7.3	7.26	7.23	7.27	7.17	7.22	7.26	7.25	7.23	7.21	7.33	7.33
0d7VOWguneodFHUnfQ	7.18	7.15	7.16	7.17	7.2	7.13	7.2	7.17	7.18	7.13	7.12	7.17	7.19	7.16	7.19	7.12	7.13	7.16	7.25	7.19	7.25	7.17	7.19	7.18	7.2	7.15	7.09	7.13	7.23	7.11	7.17	7.14	7.25	7.18	7.15	7.22	7.12	7.1	7.18	7.15	7.14	7.19	7.11	7.11	7.18	7.2	7.27	7.15	7.19
0d7VSJLRXUV5PyCjL8	7.27	7.38	7.38	7.35	7.39	7.21	7.21	7.28	7.35	7.39	7.35	7.37	7.28	7.2	7.31	7.39	7.32	7.41	7.2	7.23	7.23	7.33	7.18	7.17	7.19	7.2	7.33	7.14	7.17	7.23	7.2	7.27	7.35	7.29	7.29	7.2	7.24	7.43	7.34	7.21	7.25	7.25	7.23	7.28	7.43	7.25	7.2	7.17	7.35
0d83FzheYnlRRVS__Y	8.97	8.85	9.84	9.53	9.11	8.33	8.58	8.79	9.18	9.98	8.67	8.74	8.84	8.84	8.48	8.65	8.78	8.29	8.97	9.05	9.29	8.38	8.58	9.09	8.36	9.4	8.78	9.43	8.41	9.13	9.27	9.44	9.56	9.03	8.39	8.59	8.32	8.78	9.03	8.66	8.56	8.25	9.16	8.58	9.06	8.6	8.71	8.7	8.66
0d_0nX15V99OdeYa40	7.26	7.31	7.34	7.5	7.34	7.29	7.2	7.34	7.35	7.37	7.44	7.41	7.34	7.27	7.24	7.38	7.41	7.45	7.24	7.19	7.23	7.21	7.31	7.35	7.32	7.18	7.31	7.24	7.22	7.17	7.14	7.23	7.22	7.28	7.23	7.21	7.34	7.28	7.22	7.23	7.16	7.25	7.29	7.27	7.2	7.23	7.45	7.24	7.28
0D_R6gXqAi4eMP.rm4	9.02	8.77	9.72	8.94	8.96	8.67	8.78	8.18	9.24	10.2	9.08	9.18	9.07	9.88	9.5	10.01	9.17	9.65	7.18	7.18	7.24	7.21	7.19	7.11	7.18	7.53	9.55	7.29	7.15	7.4	7.37	7.67	7.69	7.68	9.22	7.4	9.38	8.64	7.5	7.37	7.5	9.77	9.88	9.8	9.58	7.15	7.22	7.44	8.43
0dAlIlRxALnf1_r5xU	7.13	7.08	7.11	7.15	7.11	7.13	7.1	7.11	7.16	7.14	7.18	7.15	7.17	7.11	7.1	7.08	7.1	7.12	7.14	7.17	7.18	7.17	7.15	7.15	7.17	7.1	7.06	7.06	7.18	7.14	7.12	7.09	7.13	7.09	7.09	7.18	7.14	7.09	7.14	7.19	7.13	7.13	7.22	7.19	7.18	7.17	7.14	7.16	7.15
0dAviKfupByj5HUSgA	7.17	7.18	7.51	7.14	7.3	7.28	7.21	7.16	7.21	7.33	7.22	7.24	7.65	7.32	7.16	7.19	7.17	7.18	7.21	7.41	7.31	7.25	7.2	7.18	7.2	7.27	7.22	7.25	7.29	7.21	7.18	7.2	7.19	7.27	7.23	7.22	7.24	7.19	7.19	7.2	7.19	7.17	7.3	7.17	7.17	7.27	7.2	7.27	7.28
0ddILSZKCJef6EaiAI	10.3	10.31	10.58	11.07	10.21	10.06	10.78	10.56	10.49	10.02	11	11.01	10.09	10.67	10.47	10.55	10.28	9.16	11.78	10.91	10.19	10.35	11.23	11.86	10.83	11.02	10.97	10.61	10.85	10.55	11.17	11.26	10.72	12.15	10.92	11.2	10.89	10.53	10.8	10.31	12.31	11.52	10.22	10.79	10.6	10.92	11.73	10.64	10.99
0dduLKBXt0uT.v9efU	7.54	7.55	7.46	7.58	7.4	7.53	7.6	7.47	7.39	7.49	7.44	7.29	7.42	7.28	7.4	7.32	7.53	7.39	7.39	7.35	7.53	7.41	7.44	7.69	7.34	7.47	7.48	7.58	7.23	7.56	7.48	7.5	7.48	7.52	7.47	7.4	7.47	7.37	7.56	7.54	7.48	7.49	7.38	7.25	7.28	7.54	7.38	7.59	7.31
0DeBEqqAbhFGoBAuLU	7.47	7.48	7.49	7.42	7.44	7.49	7.49	7.41	7.38	7.46	7.55	7.4	7.53	7.51	7.46	7.44	7.47	7.47	7.6	7.67	7.56	7.61	7.51	7.94	7.67	7.52	7.42	7.62	7.48	7.6	7.59	7.63	7.58	7.52	7.41	7.46	7.36	7.54	7.46	7.5	7.54	7.36	7.42	7.49	7.41	7.47	7.5	7.56	7.44
0dEDohMkiRE41XCd00	7.24	7.14	7.19	7.16	7.18	7.21	7.21	7.15	7.22	7.18	7.13	7.12	7.26	7.19	7.21	7.23	7.14	7.12	7.16	7.16	7.15	7.17	7.1	7.12	7.07	7.19	7.19	7.22	7.14	7.18	7.17	7.23	7.24	7.18	7.24	7.12	7.18	7.33	7.17	7.24	7.19	7.14	7.2	7.15	7.26	7.13	7.15	7.27	7.4
0df0fu7qu1NV.Se5oQ	7.37	7.36	7.35	7.38	7.41	7.36	7.43	7.34	7.36	7.33	7.43	7.42	7.31	7.36	7.33	7.38	7.37	7.39	7.41	7.5	7.46	7.3	7.3	7.53	7.27	7.43	7.37	7.42	7.26	7.37	7.29	7.43	7.43	7.21	7.36	7.36	7.36	7.43	7.36	7.33	7.32	7.4	7.32	7.38	7.35	7.28	7.39	7.31	7.38
0df3HjT57VfRKoiqU4	7.32	7.29	7.31	7.31	7.26	7.33	7.33	7.34	7.27	7.33	7.26	7.31	7.28	7.38	7.36	7.3	7.28	7.32	7.35	7.56	7.53	7.29	7.28	7.72	7.44	7.27	7.3	7.28	7.33	7.31	7.32	7.42	7.28	7.32	7.26	7.5	7.39	7.29	7.37	7.34	7.31	7.3	7.4	7.28	7.27	7.44	7.54	7.32	7.3
0df9qbVilnVQWEFCFU	7.15	7.2	7.22	7.2	7.21	7.22	7.22	7.24	7.22	7.25	7.24	7.33	7.22	7.34	7.22	7.34	7.23	7.31	7.54	7.2	7.23	7.22	7.17	7.2	7.19	7.14	7.2	7.17	7.21	7.22	7.22	7.22	7.13	7.16	7.27	7.23	7.23	7.2	7.23	7.17	7.22	7.29	7.34	7.25	7.2	7.29	7.24	7.2	7.21
0dFB5FLiggh5uj06ok	10.11	10.01	10.95	10.53	9.66	9.37	9.46	9.7	9.27	11.11	9.32	9.29	9.23	9.63	9.82	9.84	9.27	8.84	9.83	9.14	9.51	8.11	8.68	9.02	8.33	10.26	9.19	9.52	8.57	9.44	9.34	9.92	9.16	8.95	9.63	8.18	8.62	9.3	8.8	8.54	9.5	9.24	10.11	9.64	10.41	8.56	8.68	9.2	9.14
0DgBN4tdhTHLr2cSig	7.53	11.73	9.61	7.24	14.23	7.12	8.28	7.23	7.58	10.48	9.87	11.26	9.69	7.23	7.21	8.5	7.44	7.12	7.21	7.19	7.24	7.21	7.9	8.21	8.82	9.13	7.27	8.31	7.2	9.46	9.33	8.49	7.31	7.22	11.42	7.58	10.38	7.32	8.88	7.26	7.28	11.1	7.86	8.4	7.56	8.12	7.23	8.2	10.09
0dGe0XtOgp0i0XuPHU	7.48	7.34	7.39	7.27	7.34	7.58	7.52	7.4	7.36	7.34	7.38	7.14	7.42	7.29	7.41	7.34	7.42	7.13	7.36	7.41	7.39	7.29	7.25	7.35	7.51	7.49	7.42	7.49	7.2	7.46	7.41	7.53	7.42	7.49	7.36	7.2	7.37	7.37	7.44	7.38	7.38	7.36	7.33	7.24	7.25	7.2	7.25	7.37	7.25
0Dh4dFUK7UAlUBCT_o	7.26	7.28	7.33	7.22	7.25	7.31	7.28	7.22	7.23	7.24	7.23	7.22	7.25	7.22	7.18	7.21	7.23	7.25	7.26	7.21	7.27	7.3	7.48	7.53	7.22	7.31	7.26	7.27	7.24	7.22	7.2	7.37	7.36	7.2	7.21	7.26	7.25	7.39	7.37	7.24	7.26	7.17	7.24	7.15	7.31	7.29	7.31	7.27	7.43
0dHqXI1_Kki.x_3OWk	7.05	7.1	7.11	7.1	7.09	7.05	7.13	7.09	7.09	7.1	7.03	7.11	7.1	7.07	7.11	7.09	7.03	7.15	7.16	7.16	7.15	7.09	7.16	7.1	7.12	7.09	7.07	7.07	7.14	7.1	7.07	7.14	7.03	7.13	7.06	7.11	7.05	7.01	7.06	7.04	7.06	7.09	7.04	7.11	7.1	7.14	7.1	7.08	6.98
0dIgHtfeyekhUpcfik	7.21	7.34	7.26	7.21	7.21	7.25	7.31	7.18	7.17	7.22	7.19	7.22	7.2	7.27	7.26	7.21	7.24	7.19	7.36	7.34	7.39	7.31	7.41	7.27	7.23	7.22	7.19	7.23	7.21	7.25	7.24	7.24	7.23	7.25	7.2	7.36	7.25	7.29	7.27	7.26	7.17	7.26	7.32	7.19	7.23	7.31	7.32	7.23	7.27
0dIinQSflVFOSftLJI	7.2	7.23	7.27	7.2	7.23	7.14	7.22	7.19	7.26	7.3	7.22	7.3	7.18	7.26	7.21	7.21	7.2	7.35	7.27	7.52	7.33	7.33	7.25	7.5	7.33	7.23	7.21	7.19	7.42	7.22	7.21	7.26	7.26	7.24	7.24	7.49	7.18	7.14	7.22	7.22	7.24	7.2	7.2	7.26	7.26	7.31	7.27	7.2	7.2
0DIjitUKlQfVERaUoc	7.25	7.46	7.24	7.27	7.23	7.17	7.22	7.23	7.28	7.67	7.22	7.3	7.26	7.32	7.21	7.19	7.21	7.24	7.24	7.57	7.29	7.34	7.53	7.79	7.37	7.31	7.31	7.24	7.29	7.35	7.21	7.28	7.28	7.28	7.2	7.3	7.19	7.38	7.44	7.25	7.26	7.22	7.22	7.35	7.21	7.28	7.26	7.22	7.36
0dJ5Kke76gFPp6l.ig	8.69	8.53	8.44	8.48	8	8.54	8.5	8.9	8.15	8.24	8.59	8.09	8.37	8.26	8.34	8.24	8.61	10.66	7.98	8.18	8.1	8.23	8.56	8.41	9.95	8.16	8.55	7.82	8.63	8.23	8.2	8.73	8.29	8.43	8.15	8	7.95	8.57	8.36	8.56	8.14	8.37	8.31	8.78	8.87	8.2	8.48	8.73	8.27
0DJ9t0v1UAqsVKVdd4	7.96	7.67	7.85	7.96	7.87	7.58	8.06	7.9	8.33	7.77	7.68	7.94	7.89	7.74	7.9	7.94	8	7.49	7.71	7.85	8.23	8.1	8.28	8.26	8.11	7.82	7.86	7.98	8.19	8.09	7.9	7.81	7.96	7.79	7.84	7.9	8.44	7.97	7.84	8.38	7.76	7.91	7.58	8.22	7.66	7.76	8.14	8.21	8.24
0dJsGV_A7NavvkbNLI	7.52	7.19	7.26	7.15	7.12	7.2	7.18	7.18	7.19	7.76	7.22	7.09	7.16	7.16	7.35	7.25	7.1	7.17	7.19	7.71	7.23	7.26	7.18	7.22	7.2	7.12	7.18	7.16	7.16	7.23	7.16	7.14	7.2	7.11	7.17	7.18	7.2	7.14	7.17	7.23	7.15	7.44	7.63	7.17	7.56	7.19	7.23	7.16	7.2
0dK41EZdLtUi54zxKY	7.17	7.11	7.1	7.1	7.13	7.12	7.12	7.23	7.14	7.13	7.19	7.14	7.1	7.09	7.15	7.15	7.22	7.15	7.15	7.17	7.18	7.16	7.15	7.11	7.17	7.16	7.14	7.17	7.15	7.16	7.14	7.16	7.1	7.15	7.15	7.13	7.14	7.09	7.13	7.2	7.16	7.16	7.14	7.11	7.14	7.11	7.13	7.15	7.11
0dKgdr.6ITi3njnXh4	7.24	7.4	7.17	7.19	7.21	7.08	8.84	7.47	7.21	7.86	9.96	9.35	7.15	7.1	7.12	7.17	7.18	7.21	7.19	7.18	7.19	7.19	7.16	7.16	7.18	7.26	7.12	9.61	7.83	7.14	7.11	7.12	7.18	7.11	7.14	7.23	7.12	7.1	7.32	7.34	7.28	7.16	7.24	7.1	7.2	7.14	7.14	7.16	7.07
0dKog6h4iEIqSiAtEg	7.44	7.31	7.34	7.28	7.27	7.39	7.28	7.35	7.4	7.33	7.33	7.37	7.35	7.38	7.34	7.37	7.49	7.3	7.42	7.56	7.35	7.54	7.44	7.69	7.53	7.37	7.48	7.42	7.32	7.55	7.34	7.45	7.51	7.43	7.31	7.42	7.35	7.41	7.4	7.45	7.48	7.33	7.41	7.28	7.27	7.41	7.44	7.46	7.39
0dL.qjkgFIzelUo_lE	7.34	7.2	7.22	7.19	7.28	7.2	7.24	7.21	7.24	7.28	7.24	7.21	7.32	7.24	7.24	7.19	7.25	7.21	7.17	7.17	7.21	7.19	7.16	7.18	7.19	7.28	7.17	7.35	7.2	7.22	7.29	7.22	7.22	7.17	7.26	7.12	7.31	7.34	7.3	7.27	7.27	7.29	7.25	7.24	7.16	7.18	7.15	7.29	7.24
0dladYddYfdd5dtrtc	7.29	7.46	7.41	7.43	7.26	7.27	7.25	7.42	7.26	7.33	7.6	7.42	7.22	7.25	7.19	7.36	7.29	7.44	7.69	8.38	7.65	7.8	7.75	7.98	7.78	7.27	7.32	7.27	7.69	7.37	7.41	7.31	7.3	7.33	7.32	7.66	7.33	7.25	7.35	7.25	7.31	7.23	7.24	7.71	7.35	7.66	7.8	7.65	7.21
0DM.D.7Q8d.AXwwL4w	7.1	7.16	7.12	7.12	7	7.09	7.08	7.04	7.09	7.05	7.1	7.1	7.08	7.08	7.16	7.11	7.06	7.1	7.16	7.17	7.17	7.16	7.15	7.15	7.16	7.12	7.17	7.14	7.18	7.2	7.11	7.12	7.18	7.11	7.1	7.13	7.05	7.04	7.11	7.1	7.06	7.02	7.1	7.09	7.15	7.13	7.16	7.07	7.12
0DneBip6iOV8igOO4k	7.29	7.29	7.27	7.28	7.3	7.3	7.34	7.29	7.28	7.24	7.25	7.2	7.3	7.27	7.25	7.18	7.25	7.15	7.19	7.29	7.21	7.2	7.22	7.18	7.21	7.28	7.3	7.39	7.15	7.32	7.23	7.24	7.33	7.28	7.34	7.17	7.26	7.29	7.26	7.35	7.34	7.27	7.21	7.25	7.22	7.19	7.2	7.3	7.32
0dO0nlS6c7fBQ1_Pkk	7.17	7.14	7.17	7.17	7.22	7.15	7.14	7.17	7.14	7.18	7.21	7.2	7.19	7.19	7.18	7.22	7.18	7.19	7.17	7.18	7.18	7.08	7.12	7.07	7.12	7.1	7.13	7.19	7.14	7.1	7.21	7.17	7.15	7.06	7.18	7.17	7.25	7.05	7.14	7.18	7.18	7.16	7.19	7.22	7.23	7.22	7.14	7.18	7.29
0dOiBUqhJ65A9IHip0	8.52	8.52	8.21	7.9	7.67	9.62	8.27	9.8	8.06	8.81	8.14	7.65	8.36	8.04	8.43	8.17	7.83	8.66	8.68	8.37	8.22	9.1	8.45	7.24	8.09	8.96	8.39	8.27	8.32	8.57	8.72	7.77	7.69	8.86	8.33	7.98	7.92	8.15	8.41	8.03	8.87	7.82	7.87	8.06	7.87	7.9	7.67	8.1	8.13
0DOPcKlEO1B9LMCF3c	7.24	7.23	7.21	7.21	7.23	7.24	7.23	7.22	7.25	7.25	7.21	7.15	7.27	7.27	7.27	7.25	7.21	7.22	7.22	7.2	7.22	7.3	7.23	7.55	7.3	7.28	7.22	7.26	7.26	7.23	7.24	7.16	7.24	7.35	7.3	7.2	7.24	7.27	7.19	7.27	7.27	7.19	7.24	7.22	7.26	7.25	7.22	7.26	7.28
0DPIw9cxzn3v7.A45I	7.18	7.16	7.16	7.13	7.17	7.18	7.15	7.15	7.16	7.12	7.12	7.1	7.18	7.09	7.17	7.16	7.13	7.1	7.15	7.18	7.21	7.19	7.2	7.16	7.18	7.13	7.15	7.21	7.18	7.2	7.1	7.15	7.12	7.13	7.14	7.16	7.12	7.19	7.06	7.12	7.21	7.1	7.09	7.08	7.06	7.15	7.22	7.15	7.19
0dPnGqphujnnuiCeIQ	7.67	7.89	7.58	7.38	7.62	7.36	7.39	7.38	7.5	7.41	7.58	7.47	7.41	7.58	7.53	7.71	7.62	7.84	7.71	7.45	7.74	7.61	7.54	7.67	7.7	7.51	7.55	7.65	7.36	7.47	7.58	7.53	7.52	7.53	7.52	7.49	7.47	7.55	7.49	7.62	7.68	7.45	7.65	7.53	7.74	7.53	7.64	7.54	7.53
0Dq_vf3JX1SHhzKUmo	8.12	8.21	8.32	8.14	7.97	8.21	7.73	7.55	7.96	8.41	7.71	7.66	7.69	8.45	7.88	7.42	7.62	7.42	7.79	8.39	7.31	8.38	8.07	7.82	7.6	8.89	8.13	8.68	8.38	8.5	8.62	7.9	7.75	8.23	7.75	8.13	7.86	7.35	7.5	7.71	8.76	8.31	8.5	8.02	8.15	7.57	7.47	7.95	7.53
0dqUd4Rfy.a0HQrIS4	7.27	7.25	7.28	7.18	7.31	7.31	7.25	7.25	7.3	7.31	7.32	7.26	7.3	7.13	7.24	7.28	7.26	7.22	7.24	7.26	7.31	7.16	7.17	7.18	7.19	7.32	7.3	7.36	7.17	7.37	7.34	7.32	7.24	7.26	7.3	7.16	7.23	7.21	7.26	7.29	7.33	7.26	7.12	7.24	7.26	7.14	7.19	7.29	7.24
0DRJ3qABBgH9X7oiio	8.67	8.4	9.32	8.88	8.92	9.12	9.02	8.85	9.19	9.96	8.84	9.28	8.94	8.75	9.36	9.38	9.19	8.94	8.11	7.99	7.87	7.61	7.93	8.27	7.84	8.27	9.62	8.08	8.25	8.05	8.17	8.18	8.44	8.15	9.17	7.98	9.83	8.59	8.04	7.99	8.12	9.3	9.15	9.23	9.58	8.15	8.09	8.08	8.38
0dSfrQrCVJ1SARcpSI	7.15	7.14	7.16	7.18	7.14	7.21	7.11	7.16	7.21	7.16	7.12	7.12	7.12	7.14	7.11	7.13	7.21	7.21	7.22	7.18	7.2	7.16	7.17	7.17	7.2	7.16	7.13	7.18	7.23	7.2	7.18	7.15	7.12	7.17	7.14	7.18	7.2	7.16	7.19	7.14	7.17	7.14	7.09	7.21	7.12	7.19	7.21	7.16	7.19
0dSTUXQ6knnn7qpRfQ	7.39	7.29	7.28	7.24	7.42	7.24	7.17	7.35	7.28	7.26	7.33	7.22	7.24	7.26	7.23	7.28	7.31	7.33	7.23	7.19	7.21	7.21	7.2	7.19	7.26	7.24	7.26	7.31	7.24	7.33	7.23	7.37	7.34	7.35	7.23	7.16	7.32	7.17	7.29	7.31	7.34	7.3	7.22	7.3	7.35	7.24	7.23	7.27	7.22
0dT7o7lq97vHnfqTv0	7.15	7.17	7.23	7.26	7.18	7.19	7.13	7.19	7.14	7.22	7.17	7.16	7.16	7.2	7.23	7.12	7.17	7.19	7.24	7.2	7.22	7.2	7.25	7.18	7.24	7.17	7.16	7.22	7.2	7.25	7.17	7.21	7.21	7.22	7.23	7.22	7.13	7.19	7.12	7.27	7.22	7.2	7.16	7.16	7.2	7.2	7.17	7.19	7.15
0Dt8O.LLsO30z8ssgs	7.23	7.15	7.16	7.14	7.23	7.26	7.21	7.22	7.18	7.17	7.16	7.2	7.23	7.24	7.29	7.13	7.21	7.13	7.1	7.19	7.17	7.13	7.08	7.12	7.02	7.19	7.26	7.27	7.13	7.23	7.26	7.22	7.19	7.19	7.15	7.11	7.17	7.27	7.24	7.21	7.24	7.15	7.21	7.22	7.21	7.1	7.18	7.3	7.31
0du6qSafUKgptJDoiQ	7.36	7.38	7.37	7.37	7.34	7.39	7.33	7.35	7.31	7.34	7.23	7.29	7.33	7.35	7.43	7.29	7.33	7.33	7.37	7.22	7.32	7.26	7.43	7.71	7.28	7.42	7.3	7.42	7.47	7.37	7.44	7.46	7.49	7.41	7.33	7.36	7.3	7.37	7.39	7.35	7.39	7.4	7.25	7.28	7.39	7.33	7.35	7.33	7.34
0dU_ZfUKJ3Sl7v9Xew	7.25	7.25	7.26	7.2	8.25	7.11	7.2	7.28	7.47	7.36	7.3	7.39	7.22	7.14	8.84	7.27	7.24	7.17	7.22	7.19	7.24	7.28	7.31	7.19	7.85	7.15	7.42	7.19	7.25	7.24	7.2	7.14	7.19	7.22	7.2	7.2	7.63	7.22	7.37	8.27	7.26	9.09	7.25	7.23	7.12	7.38	7.16	7.17	8.09
0dUgV1flGRxiT.eLXE	7.27	7.26	7.3	7.33	7.34	7.3	7.2	7.28	7.36	7.41	7.3	7.39	7.24	7.4	7.35	7.33	7.29	7.33	7.17	7.24	7.25	7.27	7.35	7.49	7.24	7.22	7.32	7.28	7.25	7.27	7.31	7.38	7.37	7.33	7.37	7.36	7.32	7.41	7.3	7.34	7.29	7.3	7.41	7.36	7.32	7.31	7.29	7.33	7.37
0Dujm1_qgK6najUpMg	7.31	7.23	7.13	7.32	7.35	7.32	7.26	7.31	7.26	7.32	7.22	7.21	7.29	7.22	7.24	7.31	7.31	7.3	7.23	7.2	7.25	7.22	7.21	7.18	7.25	7.33	7.29	7.34	7.22	7.39	7.43	7.38	7.31	7.33	7.27	7.19	7.25	7.31	7.33	7.36	7.36	7.29	7.33	7.31	7.27	7.21	7.19	7.36	7.32
0dUy91Zt6_lW7vX.XM	13.93	13.92	13.81	13.87	14.03	13.11	13.31	13.38	13.76	13.44	13.85	13.76	13.44	13.76	13.67	13.61	13.71	13.79	13.87	13.75	14.42	13.66	14.18	14.1	13.91	14.17	13.66	14.22	13.78	14.3	14.15	14.52	13.79	14.1	13.56	13.37	13.56	13.77	13.84	13.89	14.24	13.41	13.48	13.34	13.67	14.06	13.95	14.13	14.01
0dUZVfU0ohvzsEc0qY	7.24	7.22	7.25	7.23	7.26	7.28	7.21	7.21	7.22	7.24	7.21	7.22	7.27	7.21	7.19	7.21	7.28	7.26	7.23	7.4	7.43	7.18	7.24	7.44	7.26	7.23	7.18	7.2	7.27	7.18	7.18	7.2	7.23	7.2	7.23	7.21	7.24	7.17	7.18	7.18	7.23	7.26	7.21	7.23	7.13	7.23	7.39	7.16	7.19
0dV6e54X8R7su_03ro	7.6	8.2	8.34	7.55	8.4	7.85	7.36	7.66	8.02	8.87	7.47	8.15	7.51	7.49	7.53	7.74	7.6	7.5	7.65	7.37	7.4	7.23	7.58	7.22	7.28	8.06	7.67	7.51	7.51	7.53	7.37	8.24	7.41	7.52	7.61	7.53	7.51	7.64	7.32	7.36	7.65	7.84	8.83	7.69	7.93	7.5	7.69	7.59	7.84
0dVAtCQiHL4Ki96pSk	8.83	7.99	8.1	8.48	8.34	7.82	9.24	8.82	8.15	7.77	8.38	9.01	8.73	8.31	7.85	9.1	8.58	7.6	8.26	8.64	8.81	9.41	10.15	9.55	9.72	9.31	9.27	9.57	10.13	9.55	9.51	8.66	9.67	8.62	8.98	9.39	10.72	9.57	9.59	9.24	8.62	8.94	8.06	8.82	7.7	10.2	8.56	9.07	9.64
0dVgkkpLuXU9JRP6zk	7.24	7.2	7.26	7.26	7.23	7.22	7.24	7.21	7.24	7.27	7.29	7.26	7.23	7.33	7.24	7.21	7.25	7.24	7.25	7.34	7.26	7.26	7.3	7.25	7.25	7.21	7.27	7.13	7.24	7.21	7.2	7.17	7.19	7.15	7.22	7.17	7.2	7.15	7.17	7.19	7.2	7.18	7.22	7.24	7.23	7.36	7.24	7.22	7.16
0DVSkp.ovv1OuOqUjs	11.14	10.89	10.62	10.51	10.89	10.24	10.69	10.84	10.56	10.54	10.27	11.56	10.05	10.37	10.67	10.87	10.99	10.14	11.05	11.19	11.03	11.38	11.94	11.71	12.06	10.67	10.49	11.12	11.55	11.2	11.39	11.37	10.91	11.21	10.76	11.04	11.04	10.98	11.11	11	10.68	11.15	9.85	10.8	10.48	11.49	11.12	10.68	11.36
0dVunSt1XNWl1eR9Hc	7.23	7.39	7.38	7.48	7.35	7.18	7.26	7.22	7.36	7.41	7.35	7.46	7.24	7.25	7.21	7.55	7.56	7.57	7.46	7.63	7.36	7.23	7.23	7.4	7.36	7.22	7.35	7.19	7.37	7.22	7.25	7.24	7.22	7.22	7.26	7.49	7.24	7.15	7.2	7.22	7.21	7.28	7.39	7.38	7.26	7.31	7.52	7.18	7.19
0dW3111XpB542H_7d4	10.11	10.79	9.32	9.65	10.81	10.22	8.49	9.8	10.88	9.6	8.25	9.48	10.18	10.91	10.62	8.99	10.31	9.15	9.24	10.29	10.91	8.69	7.95	8.47	9.44	7.7	9.49	8.76	10.01	8.07	9.19	8.79	8.59	9.83	9.59	9.09	8.49	9.79	9.6	8.78	11.29	8.66	8.12	8.77	11.22	8.12	10.89	8.88	8.71
0dWhfTRT6ISAf4rop4	7.63	7.57	7.42	7.3	7.39	7.35	7.4	7.6	8.21	7.31	7.22	7.39	7.43	7.4	7.36	7.48	7.34	7.2	8.17	7.64	7.38	7.39	8	7.18	7.21	7.49	7.68	7.87	7.45	7.54	7.83	7.41	7.5	7.34	7.49	7.42	7.54	7.55	7.36	7.23	7.39	7.6	7.63	7.76	7.23	7.83	7.43	7.38	7.43
0DWlKj_pfXujbkXeCQ	7.11	7.13	7.13	7.1	7.08	7.06	7.14	7.08	7.03	7.08	7.21	7.16	7.08	7.09	7.09	7.08	7.07	7.04	7.13	7.18	7.16	7.16	7.18	7.14	7.12	7.08	7.03	7.08	7.15	7.15	7.15	7.21	7.17	7.1	7.09	7.1	7.12	7.15	7.16	7.1	7.07	7.11	7.09	7.05	7.15	7.09	7.11	7.13	7.07
0dXFeneU0l_Cpdjgl8	7.27	7.42	7.26	7.3	7.32	7.21	7.2	7.69	7.35	7.2	7.24	7.31	7.2	7.22	7.19	7.33	7.29	7.38	7.21	7.19	7.49	7.19	7.28	7.2	8.66	7.15	7.31	7.19	7.21	7.37	7.22	7.24	7.22	7.12	7.65	7.19	7.32	7.13	7.48	7.14	7.17	7.2	7.28	7.36	7.2	7.22	7.24	8.63	7.47
0dysIR_sjiIaCk_0IE	8.8	9.54	9.24	9.34	9.43	8.72	8.42	8.78	9.3	10.47	8.42	9.75	8.5	9.69	9.31	9.97	9.3	8.68	7.25	7.34	7.24	7.21	7.24	7.16	7.35	7.58	8.98	7.51	7.55	7.55	7.37	7.6	7.38	7.7	9.23	7.27	9.17	7.86	7.46	7.39	7.53	9.71	9.87	10.26	9.99	7.21	7.42	7.49	8.38
0DyWr1NF7r1J4rqKNE	7.69	8.04	8.09	7.84	7.72	8.22	8.09	7.76	8.07	8.12	8.49	7.88	7.94	7.57	8.09	8.3	7.96	8.33	8.48	8.47	7.91	8.12	7.8	7.99	8.28	7.77	7.74	7.88	8.22	8.18	7.88	8.34	7.63	8.07	8.18	8.07	7.61	7.82	7.97	7.87	7.89	8.04	8.02	7.84	7.98	7.67	8.43	8.08	7.57
0dZTdkqLxI4fb4O7go	7.14	7.18	7.15	7.17	7.14	7.16	7.16	7.15	7.16	7.17	7.18	7.17	7.2	7.11	7.18	7.19	7.15	7.14	7.26	7.18	7.23	7.24	7.21	7.17	7.19	7.13	7.14	7.15	7.18	7.14	7.15	7.14	7.18	7.11	7.16	7.26	7.15	7.13	7.1	7.24	7.12	7.1	7.22	7.12	7.07	7.24	7.25	7.05	7.13
0e._kNEeX4.K6hKjSo	7.51	7.55	7.53	7.48	7.59	7.61	7.44	7.43	7.6	7.48	7.33	7.46	7.52	7.43	7.47	7.56	7.57	7.73	7.52	7.45	7.34	7.49	7.21	7.74	7.5	7.38	7.38	7.49	7.38	7.43	7.44	7.44	7.68	7.41	7.46	7.62	7.44	7.38	7.43	7.5	7.51	7.33	7.46	7.38	7.44	7.5	7.58	7.59	7.4
0e.GISmfyUHCUSJSW4	7.25	7.26	7.26	7.29	7.3	7.3	7.25	7.27	7.26	7.23	7.25	7.22	7.24	7.33	7.27	7.27	7.26	7.27	7.38	7.62	7.43	7.66	7.65	7.76	7.51	7.27	7.31	7.26	7.32	7.33	7.31	7.35	7.35	7.32	7.23	7.4	7.3	7.3	7.38	7.35	7.32	7.24	7.28	7.29	7.25	7.45	7.37	7.29	7.3
0e.hddVd584KrJOPe4	9.57	10.4	10.07	9.53	9.32	10.39	10.32	9.74	10.21	10.33	9.91	10.29	9.83	8.86	10.19	10.62	9.83	9.25	9.88	9.87	10.27	10.24	10.34	10.17	10.64	9.43	10.04	10.76	10.43	10.64	11.04	9.79	10.19	9.74	10.31	10.46	10.34	10.34	9.91	10.21	9.74	9.88	8.9	9.83	10.37	10.53	10.3	9.75	9.24
0e0eQU4OpFVMeQoQKc	7.25	7.18	7.24	7.12	7.14	7.25	7.24	7.17	7.18	7.24	7.2	7.25	7.24	7.14	7.15	7.23	7.21	7.18	7.17	7.18	7.2	7.14	7.16	7.12	7.13	7.2	7.26	7.23	7.15	7.22	7.25	7.17	7.16	7.25	7.2	7.16	7.2	7.24	7.23	7.26	7.2	7.15	7.18	7.25	7.27	7.18	7.19	7.19	7.25
0e0fSlTXEeAnfq3p70	7.14	7.14	7.14	7.23	7.17	7.18	7.03	7.16	7.07	7.18	7.14	7.25	7.11	7.6	7.21	7.16	7.12	7.18	7.15	7.18	7.18	7.24	7.14	7.13	7.27	7.45	7.03	7.09	7.19	7.31	7.11	7.08	7.2	7.2	7.14	7.11	7.16	7.27	7.2	7.2	7.15	7.29	7.38	7.13	7.21	7.19	7.12	7.18	7.27
0e0o6rfXT7Km8o75.c	10.71	11.13	11.04	11.52	10.83	11.66	10.55	11.64	11.03	10.16	11.39	10.66	10.85	11.29	11.14	10.73	11.52	11.13	11.02	11.14	10.89	10.29	10.91	10.78	10.69	10.83	10.76	11.16	10.39	10.7	11.61	9.57	10.19	11.6	10.86	10.82	10.34	10.62	10.37	10.87	11.16	10.54	11.23	10.71	10.89	10.72	10.25	10.97	10.68
0e4kilLD.ohKF2l4C4	7.16	7.15	7.17	7.15	7.18	7.22	7.22	7.19	7.18	7.13	7.23	7.19	7.25	7.15	7.21	7.18	7.18	7.14	7.2	7.19	7.2	7.16	7.17	7.17	7.18	7.19	7.25	7.29	7.19	7.24	7.27	7.17	7.22	7.25	7.19	7.25	7.2	7.22	7.24	7.18	7.3	7.16	7.23	7.27	7.22	7.21	7.2	7.22	7.17
0e4roFH64_4lJEI2Ck	7.21	7.17	7.17	7.19	7.14	7.15	7.14	7.18	7.19	7.13	7.19	7.16	7.18	7.19	7.2	7.16	7.13	7.16	7.2	7.18	7.2	7.22	7.27	7.17	7.36	7.16	7.28	7.21	7.35	7.16	7.18	7.2	7.18	7.24	7.17	7.22	7.13	7.17	7.2	7.17	7.19	7.19	7.14	7.15	7.27	7.25	7.19	7.18	7.19
0e4TXV3TgntedyRc44	7.22	7.35	7.24	7.19	7.26	7.25	7.27	7.2	7.21	7.39	7.26	7.2	7.28	7.19	7.18	7.24	7.18	7.24	7.28	7.2	7.2	7.25	7.2	7.23	7.2	7.23	7.16	7.23	7.24	7.22	7.16	7.2	7.23	7.18	7.23	7.23	7.23	7.12	7.17	7.22	7.24	7.14	7.28	7.19	7.32	7.26	7.22	7.19	7.34
0e5.F1_V_7dK7rV5ec	12.43	12.34	11.89	12.15	11.75	12.16	11.86	12.34	12.54	10.8	10.89	12.21	11.67	11.47	12.24	12.33	12.2	11.07	12.8	12.35	12.56	12.54	12.18	12.63	12.16	11.73	12.5	11.84	13.34	12.01	12.36	11.76	12.12	13.18	11.97	12.16	11.97	12.06	12.47	12.39	11.89	11.58	10.44	11.74	12.14	12.52	12.23	12.07	12.13
0e64A0166Ioliqe6Ks	7.34	7.33	7.33	7.32	7.33	7.33	7.35	7.39	7.42	7.3	7.3	7.3	7.34	7.36	7.35	7.35	7.33	7.36	7.61	7.8	7.45	7.78	7.72	7.85	7.66	7.39	7.33	7.34	7.48	7.35	7.35	7.36	7.48	7.26	7.35	7.45	7.34	7.36	7.42	7.31	7.41	7.32	7.35	7.37	7.4	7.29	7.52	7.3	7.39
0e69D0lS7RPRIBBUkE	7.15	7.16	7.11	7.15	7.23	7.16	7.12	7.14	7.16	7.2	7.11	7.2	7.17	7.12	7.11	7.13	7.15	7.15	7.18	7.18	7.2	7.13	7.17	7.14	7.18	7.12	7.19	7.19	7.15	7.18	7.17	7.17	7.16	7.17	7.12	7.15	7.16	7.22	7.17	7.12	7.18	7.24	7.2	7.21	7.1	7.11	7.11	7.19	7.19
0e6de4qgCd0Ys0k15A	7.34	7.37	7.31	7.3	7.35	7.38	7.32	7.32	7.34	7.38	7.36	7.29	7.39	7.35	7.4	7.32	7.36	7.28	7.23	7.19	7.28	7.29	7.24	7.23	7.24	7.32	7.38	7.33	7.26	7.35	7.45	7.33	7.43	7.37	7.35	7.24	7.4	7.36	7.34	7.36	7.39	7.38	7.33	7.36	7.3	7.22	7.3	7.45	7.23
0e6Eq5J3FL17994lIU	9.51	9.38	9.28	9.49	8.99	9.06	9.42	9.47	9.36	9.11	9.24	9.19	9.3	9.16	9.18	9.45	9.55	9.05	9.47	9.53	9.95	10.13	10.45	9.3	10.36	9.26	10.34	9.15	10.49	9.74	10.13	9.1	10.34	9.88	9.52	10.23	10.15	9.7	10.09	9.6	9.66	9.4	8.91	9.33	8.89	10.39	10.58	10.04	9.56
0E6o7qK6gqJUKIuJ6Q	7.32	7.42	7.44	7.27	7.39	7.39	7.44	7.35	7.44	7.36	7.4	7.29	7.34	7.3	7.37	7.37	7.42	7.48	7.63	7.65	7.58	7.82	7.67	7.66	7.57	7.52	7.36	7.44	7.58	7.37	7.49	7.48	7.47	7.49	7.33	7.52	7.34	7.34	7.38	7.45	7.46	7.34	7.28	7.29	7.36	7.5	7.59	7.51	7.32
0e6OSOevoN_n_WXXLk	7.17	7.24	7.19	7.14	7.16	7.21	7.17	7.24	7.17	7.21	7.22	7.15	7.17	7.27	7.17	7.22	7.24	7.23	7.3	7.25	7.24	7.22	7.24	7.28	7.38	7.19	7.28	7.15	7.22	7.24	7.14	7.21	7.24	7.16	7.19	7.2	7.19	7.09	7.19	7.18	7.15	7.24	7.23	7.19	7.23	7.27	7.29	7.19	7.12
0e6Ts0ur5098SYTJD0	7.18	7.16	7.22	7.18	7.16	7.19	7.13	7.09	7.14	7.16	7.18	7.2	7.17	7.2	7.18	7.18	7.15	7.16	7.21	7.2	7.21	7.17	7.2	7.27	7.2	7.17	7.23	7.19	7.18	7.21	7.21	7.17	7.2	7.2	7.17	7.12	7.26	7.14	7.21	7.2	7.19	7.23	7.19	7.2	7.18	7.21	7.2	7.19	7.13
0e7cid6l0qsKgoJSX8	7.3	7.21	7.32	7.32	7.21	7.3	7.25	7.3	7.28	7.26	7.42	7.31	7.43	7.25	7.27	7.26	7.31	7.27	7.37	7.37	7.3	7.28	7.2	7.47	7.22	7.23	7.22	7.26	7.3	7.2	7.2	7.24	7.27	7.22	7.31	7.42	7.25	7.23	7.31	7.25	7.19	7.25	7.25	7.21	7.19	7.23	7.29	7.35	7.19
0E7nlcSRXut9djAqBQ	7.25	7.4	11.75	7.57	7.46	8.93	7.85	8.42	7.99	7.19	7.56	7.94	7.51	8.07	8.01	7.32	7.2	8.08	8.14	7.3	8.5	8.31	8.49	8.2	7.22	7.23	7.36	7.48	8.14	8.05	7.65	7.67	8.72	7.64	7.23	9.5	7.6	7.37	7.67	7.26	7.71	7.39	7.34	10.01	8.04	7.46	10.25	10.35	8.55
0e7noA41apShIQFIl0	7.76	7.48	7.54	7.25	7.46	7.51	7.63	7.72	7.51	7.37	7.49	7.45	7.76	7.44	7.45	7.72	7.46	7.42	7.52	7.77	7.69	7.77	8.06	7.69	7.47	7.53	7.54	7.81	7.79	7.67	8	7.57	7.57	7.68	7.55	7.59	7.7	7.52	7.55	7.87	7.5	7.44	7.42	7.39	7.32	7.7	7.52	7.75	7.46
0e7utevh6k3AqDSAIg	8.34	8.82	7.91	8.23	8.49	8.37	7.86	7.81	8.79	9.33	9.6	8.14	8.46	8.15	8.72	8.76	8.08	8.39	7.98	7.23	7.71	8.39	8.22	7.29	7.81	8.4	8.48	8.25	8.26	8.18	8.45	7.9	8.46	7.92	8.94	8.08	8.44	8.67	8.09	8.32	8.41	8.59	8.15	9.17	8.52	8.06	8.08	7.96	8.46
0e7VsU56EwH34igoe0	7.18	7.18	7.21	7.19	7.25	7.16	7.27	7.18	7.21	7.23	7.17	7.15	7.24	7.21	7.18	7.35	7.2	7.28	7.24	7.22	7.22	7.21	7.24	7.44	7.26	7.24	7.25	7.24	7.21	7.2	7.12	7.24	7.25	7.23	7.18	7.19	7.14	7.26	7.24	7.16	7.24	7.25	7.21	7.26	7.39	7.2	7.21	7.19	7.2
0E90qLerOeoA0lI5a4	10.83	11.14	11.38	11.66	11.48	10.97	10.59	11.19	11.32	10.89	11.28	11.09	10.24	11.59	11.43	11.27	10.42	11.52	11.66	11.17	12.12	10.61	11.25	11.43	10.3	11.74	10.64	11.05	11.31	11.11	11.24	11.12	11.11	11.63	11.01	10.9	10.52	11.48	10.88	10.76	12.1	10.98	10.91	10.91	11.75	11.19	11.69	11.15	10.9
0EBVuzd0MCulgqXY7o	8.13	7.44	7.38	7.21	7.38	7.15	7.42	7.24	7.31	7.28	7.19	7.18	7.34	7.22	7.16	8.05	7.43	7.6	7.22	7.38	7.84	7.37	7.21	7.26	7.2	7.36	7.17	8.03	7.25	7.48	8	7.27	7.32	7.23	7.47	7.34	7.47	7.62	7.38	7.19	7.26	7.28	7.16	7.12	7.44	7.48	7.19	7.18	7.38
0eCamjRCtKE2AU168E	8.58	8.38	8.75	8.53	8.17	8.9	8.88	8.35	8.44	8.88	9.19	8.42	8.56	8.9	8.51	8.88	8.57	9.06	8	8.31	8.38	8.86	8.03	8.47	8.6	7.95	8.46	7.96	8.62	8.16	7.88	8.18	8.26	8.55	8.99	8.47	8.31	8.31	8.18	8.32	8.2	8.62	9.1	8.49	9.21	8.52	8.48	8.28	8.39
0eCAQZLtGQlHSEJUqs	8.06	8.77	8.57	8.17	8.93	7.99	8.24	8.23	8.25	8.93	8.5	8.43	8.17	8.45	8.2	8.44	8.23	8.31	8.54	8.9	8.65	8.11	9.15	8.55	8.43	8.25	8.33	8.39	8.37	8.24	8.38	8.36	8.34	8.79	8.38	9.14	8.49	8.37	8.25	8.43	8.81	8.64	8.89	8.52	8.5	9.09	9.04	8.32	8.42
0ECqTqXUl.lRC5dLlQ	8.54	7.67	7.98	8.42	7.93	7.94	8.08	8.06	8.22	7.93	7.88	8.35	8.12	7.71	8.01	8.25	7.78	7.52	7.66	7.81	8.06	8.34	8.06	8.29	8.38	7.88	8.17	8.62	8.97	8.16	8.18	7.74	8.51	7.57	7.85	8.25	8.12	8.28	8.47	7.85	7.87	7.49	7.66	7.99	7.88	8.1	8.52	8.02	8.58
0eCruCKMeFRSAiFUec	7.14	7.14	7.15	7.14	7.08	7.14	7.11	7.1	7.15	7.08	7.18	7.29	7.19	7.11	7.18	7.26	7.14	7.17	7.17	7.19	7.19	7.17	7.2	7.17	7.21	7.23	7.17	7.16	7.2	7.19	7.16	7.11	7.29	7.12	7.19	7.16	7.23	7.19	7.1	7.34	7.12	7.13	7.11	7.13	7.12	7.26	7.21	7.18	7.16
0eCWe2A6tijeuabvR8	7.2	7.19	7.19	7.1	7.15	7.14	7.18	7.21	7.17	7.09	7.12	7.12	7.14	7.08	7.09	7.14	7.15	7.08	7.16	7.19	7.17	7.1	7.16	7.16	7.18	7.11	7.09	7.2	7.17	7.18	7.14	7.14	7.11	7.17	7.13	7.11	7.14	7.22	7.15	7.18	7.13	7.14	7.19	7.18	7.18	7.11	7.12	7.21	7.11
0eD9LOWp.3s5UC6v4A	7.15	7.17	7.23	7.19	7.24	7.18	7.25	7.17	7.18	7.17	7.19	7.12	7.17	7.32	7.21	7.15	7.2	7.17	7.2	7.27	7.18	7.15	7.19	7.21	7.19	7.2	7.12	7.18	7.19	7.19	7.19	7.11	7.22	7.18	7.13	7.24	7.21	7.14	7.1	7.21	7.15	7.22	7.24	7.2	7.18	7.26	7.23	7.22	7.2
0edV_TAo3czXINUr8o	7.53	7.67	8.17	8.15	8.06	7.42	7.59	7.52	7.86	7.91	8.49	8.41	7.54	7.61	7.53	8.09	7.84	7.69	7.45	7.27	7.59	7.82	8.13	7.77	8.09	7.61	7.89	7.61	8.12	7.5	7.35	7.42	7.6	7.42	7.67	7.64	8.48	7.97	7.58	7.61	7.59	7.96	7.6	7.82	7.74	7.73	7.68	7.58	8.03
0EE0R0VwXHpoSY1S.k	7.23	7.97	7.19	7.22	7.34	7.24	7.6	7.51	7.27	7.42	7.61	7.51	7.31	8.47	7.46	7.27	7.26	7.32	7.24	7.28	7.78	7.5	7.21	9.08	7.79	7.29	7.23	7.23	8.58	7.28	7.15	7.24	7.22	7.68	7.35	7.5	7.26	7.24	7.32	7.75	7.38	7.33	7.32	7.27	7.32	7.41	7.2	8.15	7.21
0eeaiheBCCSFSCh_i4	7.48	7.52	7.67	8.04	7.46	7.62	7.53	7.61	7.39	7.62	7.92	7.74	7.4	7.54	7.46	7.38	7.49	7.67	8.08	7.74	7.64	7.75	7.31	7.53	7.24	7.34	7.46	7.9	7.62	7.36	7.43	7.57	7.33	7.73	7.55	7.46	7.52	7.35	7.41	7.7	7.54	7.4	7.41	7.4	7.56	7.44	7.51	7.85	7.52
0eeeKD_JU8kuOClegc	8.76	9.28	9.76	9.09	8.83	9.89	10.71	9.16	9.99	9.92	10.5	8.46	10.27	8.94	10.11	10.15	9.45	9.73	9.3	9.67	10.29	11.23	9.62	10.92	10.29	7.89	8.3	7.88	9.56	9.09	8.26	8.93	8.94	9.54	9.65	10.17	8.46	10.05	9.23	9.79	8.14	9.22	9.57	9.87	10.48	9.26	9.03	9.05	8.29
0EekdoS56CrhN5Rznk	7.23	7.16	7.16	7.09	7.17	7.11	7.22	7.14	7.14	7.17	7.15	7.19	7.13	7.08	7.23	7.23	7.22	7.15	7.15	7.16	7.17	7.15	7.17	7.09	7.15	7.11	7.08	7.16	7.18	7.19	7.13	7.05	7.17	7.06	7.12	7.14	7.13	7.17	7.16	7.12	7.13	7.23	7.11	7.23	7.19	7.13	7.09	7.09	7.15
0eErHnq5IJNH14XoDY	7.17	7.21	7.19	7.19	7.25	7.25	7.32	7.18	7.16	7.22	7.22	7.21	7.24	7.15	7.21	7.22	7.21	7.27	7.2	7.19	7.22	7.22	7.2	7.21	7.21	7.23	7.21	7.19	7.24	7.17	7.3	7.19	7.2	7.23	7.2	7.17	7.24	7.28	7.25	7.21	7.21	7.17	7.22	7.18	7.23	7.24	7.16	7.25	7.23
0efeTSfUHUXgS1YklI	9.37	10.13	9.84	8.88	9.56	8.98	9.74	9.58	9.71	9.84	9.96	9.15	9.4	9.27	9.31	10.01	9	9.79	9.39	10.2	10.43	10.13	10.32	10.27	9.86	9.87	8.44	9.75	9.27	9.92	9.91	9.6	9.52	9.26	9.1	9.57	9.09	9.66	9.03	9.15	10.25	9.31	9.36	9.5	10	9.92	9.43	9.58	9.65
0egKgAKST0UTVDXg1A	7.23	7.17	7.18	7.22	7.13	7.14	7.21	7.19	7.18	7.23	7.22	7.21	7.18	7.23	7.24	7.2	7.23	7.22	7.17	7.17	7.19	7.18	7.15	7.16	7.15	7.23	7.27	7.19	7.16	7.17	7.17	7.12	7.19	7.14	7.26	7.15	7.22	7.2	7.14	7.15	7.19	7.21	7.23	7.2	7.3	7.18	7.15	7.18	7.25
0eglxP6t5P7UfEol4U	7.21	7.09	7.1	7.11	7.13	7.17	7.12	7.12	7.14	7.13	7.13	7.13	7.14	7.15	7.14	7.12	7.18	7.16	7.18	7.19	7.19	7.15	7.19	7.12	7.16	7.17	7.15	7.12	7.13	7.14	7.18	7.14	7.21	7.15	7.17	7.15	7.26	7.15	7.15	7.15	7.26	7.19	7.16	7.16	7.13	7.14	7.16	7.14	7.13
0EgReqeagSXmxp3TQc	12.31	10.91	11.67	12.22	10.82	11.73	11.55	12.28	11.35	12.08	11.11	10.98	11.87	11.67	10.99	11.76	11.57	11.2	12.39	12.07	11.96	12.17	12.31	12.48	12.64	12.06	10.93	11.58	11.96	11.96	11.9	11.8	12.68	11.88	11.87	11.86	10.67	10.48	11.42	11.64	12.16	11.15	11.69	11.54	11.11	11.81	11.75	13.21	12.05
0eh_Kg6ICDeKJeS0k4	7.46	7.18	7.29	7.44	7.23	7.25	7.26	7.24	7.67	7.26	7.32	7.32	7.26	7.23	7.53	7.43	7.21	7.24	7.17	7.22	7.22	7.21	7.21	7.16	7.19	7.2	7.36	7.24	7.24	7.22	7.18	7.14	7.47	7.32	7.48	7.17	7.34	7.29	7.17	7.33	7.26	7.27	7.23	7.54	7.48	7.15	7.2	7.24	7.25
0EI6Ve7r1fxfp9elS0	7.51	7.93	7.3	7.3	7.46	7.24	7.2	7.27	7.25	7.31	7.25	7.41	7.27	7.53	7.18	7.38	7.25	7.2	7.17	7.19	7.19	7.18	7.26	7.18	7.71	8.32	7.26	7.22	7.33	7.66	7.74	7.22	7.53	7.18	7.41	7.22	7.21	7.32	7.16	7.36	7.2	7.23	7.29	7.22	7.46	7.4	7.26	7.19	7.42
0ei_cD8Nc365QH.upE	7.12	7.09	7.13	7.21	7.1	7.1	7.13	7.17	7.11	7.15	7.13	7.12	7.13	7.12	7.15	7.12	7.15	7.08	7.14	7.18	7.21	7.19	7.19	7.16	7.16	7.15	7.17	7.17	7.18	7.16	7.09	7.11	7.18	7.13	7.12	7.09	7.17	7.11	7.15	7.15	7.16	7.1	7.12	7.16	7.1	7.15	7.14	7.19	7.11
0eiEUtSeKEMiCUV9dA	7.25	7.22	7.54	7.2	7.2	7.26	7.21	7.24	7.18	7.42	7.29	7.17	7.24	7.19	7.24	7.27	7.17	7.26	7.49	7.23	7.25	7.22	7.27	7.19	7.27	7.24	7.21	7.25	7.34	7.36	7.13	7.57	7.19	7.19	7.16	7.26	7.21	7.19	7.18	7.19	7.17	7.38	7.31	7.21	7.3	7.4	7.21	7.25	7.24
0eif6jiVJuitExdCCQ	8.29	8.25	8.26	7.69	7.5	7.8	7.63	8.22	8.56	8.1	7.75	7.85	8.03	7.59	7.79	7.9	8.26	7.44	8.93	8.79	8.76	7.94	8.65	8.16	8.37	8.19	8.13	8.26	8.2	8.44	8	8.09	7.96	7.91	8.22	8.57	8.03	7.83	8.43	8.23	8.22	7.89	7.73	7.43	7.71	8.17	8.47	8.09	7.9
0eihEnIP9Siopi36NE	7.13	7.18	7.13	7.17	7.17	7.14	7.1	7.16	7.15	7.14	7.13	7.14	7.22	7.14	7.09	7.07	7.09	7.14	7.18	7.17	7.18	7.14	7.18	7.1	7.19	7.17	7.11	7.1	7.16	7.17	7.12	7.16	7.07	7.19	7.09	7.15	7.17	7.2	7.12	7.16	7.18	7.12	7.17	7.11	7.19	7.14	7.24	7.19	7.12
0eiiEOjkBJURKAhAko	7.36	7.6	7.32	7.36	7.3	7.35	7.27	7.31	7.31	7.31	7.29	7.45	7.26	7.62	7.35	7.3	7.33	7.26	7.23	7.19	7.21	7.2	7.19	7.18	7.21	7.25	7.34	7.26	7.21	7.22	7.31	7.22	7.27	7.26	7.35	7.18	7.28	7.21	7.2	7.22	7.28	7.3	7.43	7.35	7.58	7.23	7.23	7.26	7.35
0eIIOioAsgqoDnl4gU	7.31	7.27	7.4	7.27	7.33	7.4	7.33	7.31	7.3	7.35	7.18	7.33	7.34	7.33	7.31	7.23	7.3	7.29	7.38	7.21	7.28	7.38	7.25	7.38	7.33	7.3	7.2	7.33	7.23	7.3	7.27	7.47	7.35	7.33	7.27	7.28	7.3	7.35	7.28	7.27	7.32	7.33	7.34	7.22	7.3	7.27	7.32	7.39	7.27
0eIiV6d9pE._13pBN0	7.15	7.16	7.14	7.22	7.15	7.21	7.17	7.12	7.25	7.13	7.21	7.13	7.24	7.13	7.15	7.12	7.17	7.19	7.17	7.18	7.2	7.19	7.18	7.17	7.19	7.21	7.23	7.15	7.21	7.15	7.19	7.19	7.2	7.15	7.16	7.16	7.13	7.14	7.25	7.18	7.22	7.16	7.12	7.08	7.17	7.22	7.17	7.17	7.2
0eipH6FOAxSNt2m1Ss	7.23	7.23	7.14	7.29	7.27	7.26	7.18	7.34	7.23	7.2	7.22	7.38	7.19	7.24	7.31	7.25	7.24	7.2	7.18	7.27	7.26	7.2	7.18	7.21	7.2	7.33	7.22	7.28	7.14	7.3	7.22	7.21	7.3	7.24	7.2	7.15	7.28	7.22	7.32	7.3	7.31	7.18	7.19	7.2	7.19	7.21	7.24	7.3	7.2
0EjkgegktCgCLxZQvY	7.25	7.24	7.28	7.28	7.25	7.34	7.26	7.29	7.27	7.22	7.31	7.38	7.35	7.27	7.29	7.24	7.26	7.26	7.33	7.54	7.31	7.34	7.36	7.23	7.63	7.28	7.3	7.22	7.38	7.23	7.32	7.28	7.25	7.34	7.25	7.34	7.24	7.18	7.29	7.27	7.35	7.28	7.26	7.31	7.3	7.33	7.4	7.3	7.24
0ek4pHFKH3iEGCOsDU	7.12	7.19	7.1	7.11	7.13	7.2	7.15	7.14	7.16	7.1	7.13	7.17	7.16	7.17	7.16	7.12	7.09	7.14	7.16	7.19	7.17	7.16	7.14	7.16	7.17	7.16	7.14	7.15	7.15	7.14	7.12	7.15	7.17	7.09	7.15	7.16	7.13	7.14	7.16	7.21	7.17	7.13	7.13	7.19	7.11	7.11	7.14	7.13	7.19
0ekbdUgE0GCRikoIoY	7.22	7.17	7.23	7.15	7.15	7.21	7.22	7.23	7.21	7.18	7.13	7.27	7.18	7.2	7.18	7.2	7.18	7.23	7.27	7.26	7.2	7.21	7.25	7.18	7.25	7.16	7.19	7.23	7.21	7.15	7.2	7.17	7.19	7.2	7.22	7.18	7.24	7.19	7.15	7.25	7.24	7.22	7.19	7.19	7.2	7.22	7.19	7.25	7.21
0eKCJJSGDKKAFKII60	7.3	7.27	7.24	7.27	7.31	7.36	7.28	7.31	7.35	7.39	7.31	7.34	7.32	7.35	7.39	7.33	7.31	7.32	7.23	7.19	7.32	7.2	7.18	7.14	7.21	7.31	7.3	7.21	7.22	7.22	7.27	7.26	7.27	7.26	7.38	7.24	7.26	7.37	7.26	7.24	7.3	7.41	7.56	7.32	7.42	7.26	7.2	7.31	7.36
0eKLH0RSdfVemNInSs	7.53	7.64	7.58	7.88	8.13	7.38	7.62	7.44	7.5	7.66	7.85	7.61	7.78	7.65	7.48	7.72	7.62	7.65	7.67	7.83	7.65	7.61	8.21	8.01	7.74	8.01	7.55	8.49	8.06	7.9	7.99	7.93	8.01	7.46	7.6	7.52	7.84	7.68	7.68	8.01	7.56	7.48	7.6	7.57	7.43	8.16	7.7	7.77	7.93
0ekP0flSH15dKD6H1E	7.09	7.19	7.16	7.16	7.11	7.12	7.09	7.07	7.07	7.17	7.11	7.15	7.13	7.11	7.12	7.12	7.11	7.12	7.15	7.17	7.19	7.15	7.17	7.14	7.18	7.14	7.11	7.18	7.2	7.23	7.14	7.11	7.12	7.1	7.16	7.11	7.17	7.25	7.13	7.14	7.15	7.17	7.13	7.18	7.15	7.13	7.19	7.21	7.17
0eKp53Oe7OZd3pNYhM	9.78	9.84	10.5	10.34	9.62	8.95	9.07	9.3	9.49	9.69	9.1	9.63	9.26	9.22	9.82	9.99	10.24	10.32	9.17	9.12	9.05	9.27	9.06	8.93	9.96	9.21	9.25	9.14	10.54	9.78	9.44	8.77	9.25	9.85	9.77	9.67	9.12	9.21	9.71	9.5	9.31	9.39	9.24	9.32	10.48	9.54	10.16	9.7	9.77
0eKzAzLe6i4ikBS1xU	7.78	8.21	8.47	7.83	8.2	8.15	7.99	8.49	8.45	8.62	7.72	7.84	7.91	7.96	8.38	8.06	7.81	8.08	8.28	8.25	8.23	7.23	8.25	7.29	7.32	8.37	8.27	7.83	7.44	7.74	8.08	7.73	7.53	7.72	8.56	8.47	8	8.41	7.87	7.86	8.37	8.18	8.39	8.54	8.12	8.09	8.13	7.86	7.81
0eL0eWt7fWJ5ve1_04	8.85	8.43	8.94	8.85	8.82	7.74	7.85	8	8.15	8.98	7.72	7.99	7.87	8.14	7.95	7.89	8.09	8.14	8.45	7.64	8.22	7.62	8.38	7.18	7.54	8.67	7.78	8.51	7.8	7.97	8	8.54	8.42	8.05	7.88	7.42	7.55	7.77	7.66	8.38	7.88	8.02	8.22	7.6	7.65	7.97	7.33	8.12	8.39
0elRCNS1USi6imNSl8	7.63	7.39	7.28	7.25	7.24	7.35	7.35	7.48	7.43	7.42	7.45	7.39	7.45	7.38	7.32	7.31	7.35	7.37	7.35	7.54	7.44	7.26	7.66	7.37	7.22	7.4	7.47	7.82	7.51	7.74	7.66	7.44	7.61	7.31	7.52	7.92	7.56	7.62	7.78	7.66	7.47	7.43	7.43	7.37	7.3	7.62	7.48	7.33	7.32
0ElzqTki5CDhp6k93k	7.19	7.18	7.18	7.18	7.22	7.16	7.17	7.18	7.18	7.2	7.12	7.15	7.16	7.27	7.19	7.13	7.16	7.15	7.16	7.18	7.18	7.19	7.18	7.17	7.19	7.23	7.19	7.19	7.19	7.21	7.16	7.31	7.2	7.18	7.16	7.13	7.15	7.21	7.19	7.31	7.19	7.13	7.16	7.16	7.16	7.19	7.16	7.24	7.31
0EmDkCA36hIFwDp10o	7.23	7.24	7.21	7.2	7.33	7.27	7.23	7.23	7.29	7.31	7.23	7.35	7.23	7.35	7.29	7.29	7.3	7.2	7.17	7.18	7.21	7.18	7.17	7.18	7.17	7.2	7.22	7.27	7.22	7.24	7.26	7.24	7.22	7.18	7.29	7.17	7.31	7.2	7.18	7.21	7.23	7.26	7.4	7.4	7.33	7.2	7.24	7.27	7.22
0EmRAUkBFJFJFZVAQQ	7.29	7.32	7.39	7.3	7.31	7.27	7.34	7.18	7.3	7.25	7.26	7.27	7.21	7.29	7.36	7.36	7.28	7.3	7.41	7.67	7.27	7.36	7.35	7.19	7.5	7.3	7.33	7.33	7.23	7.26	7.39	7.34	7.22	7.3	7.29	7.38	7.34	7.34	7.27	7.35	7.34	7.27	7.4	7.26	7.32	7.42	7.42	7.33	7.35
0EmU3dXiDAljJRddac	11.81	11.27	12.05	11.73	11.22	10.33	11.33	11.11	11.14	10.95	11.19	11.46	10.89	10.95	10.43	11.63	11.02	10.23	10.85	11.33	11.1	10.88	11.93	11.15	11.08	11.4	10.83	11.2	11.47	11.15	11.42	11.19	11.21	10.54	10.85	11.17	11.51	11.31	11.42	10.72	10.63	11.02	10.75	10.89	10.55	11.22	11	11.36	11.63
0En7gMyBOExX317H_o	7.22	7.25	7.24	7.36	7.31	7.21	7.22	7.22	7.22	7.22	7.26	7.22	7.27	7.26	7.21	7.3	7.28	7.28	7.34	7.27	7.22	7.46	7.22	7.18	7.33	7.24	7.2	7.28	7.4	7.27	7.23	7.21	7.26	7.23	7.21	7.27	7.23	7.24	7.3	7.25	7.26	7.19	7.37	7.32	7.28	7.32	7.3	7.26	7.23
0EO.TeqB4nKa4ryXlI	7.45	7.61	7.35	7.5	7.44	7.5	7.56	7.47	7.51	7.28	7.41	7.55	7.42	7.35	7.33	7.41	7.34	7.34	7.37	7.44	7.6	8.25	7.92	8.05	8.19	7.47	7.54	7.48	7.82	7.62	7.37	7.49	7.73	7.73	7.5	7.77	7.83	7.49	7.55	7.59	7.61	7.39	7.34	7.56	7.29	8.05	7.62	7.57	7.73
0eoC52HiF_ot_oLUOo	7.24	7.25	7.24	7.29	7.28	7.23	7.23	7.31	7.32	7.23	7.21	7.26	7.31	7.29	7.23	7.27	7.24	7.3	7.39	7.48	7.44	7.36	7.43	7.33	7.25	7.31	7.34	7.22	7.35	7.28	7.26	7.27	7.28	7.31	7.24	7.31	7.26	7.26	7.32	7.25	7.23	7.33	7.19	7.36	7.25	7.29	7.25	7.19	7.27
0eOCQlN6p_g9.uIL34	7.26	7.2	7.24	7.38	7.37	7.31	7.24	7.22	7.38	7.41	7.25	7.28	7.34	7.26	7.23	7.31	7.23	7.21	7.2	7.19	7.21	7.32	7.27	7.23	7.2	7.33	7.22	7.25	7.23	7.25	7.2	7.23	7.25	7.21	7.34	7.19	7.18	7.26	7.2	7.21	7.17	7.23	7.37	7.36	7.43	7.19	7.2	7.25	7.36
0eoK6eE_gv5Xf3VOeo	7.27	7.29	7.34	7.36	7.45	7.33	7.26	7.24	7.28	7.35	7.34	7.37	7.29	7.29	7.29	7.32	7.38	7.39	7.18	7.18	7.3	7.15	7.18	7.12	7.19	7.21	7.29	7.24	7.24	7.21	7.21	7.17	7.22	7.2	7.29	7.21	7.2	7.28	7.22	7.29	7.29	7.29	7.33	7.38	7.38	7.23	7.19	7.23	7.27
0EOur5Vg1T0kX1L93E	7.13	7.16	7.18	7.17	7.17	7.79	7.25	7.43	7.19	7.21	7.21	7.15	7.3	8.31	7.28	7.3	7.13	7.26	7.2	7.18	7.22	7.19	7.19	7.16	7.17	7.22	7.32	7.17	7.18	7.22	7.27	7.2	7.17	8.15	7.16	8.16	7.19	7.22	7.18	7.19	8.21	7.2	7.2	7.18	7.21	7.18	7.34	7.69	7.28
0ep5_.7d4D4QoZKg1k	7.23	7.32	7.3	7.28	7.33	7.26	7.28	7.22	7.28	7.21	7.24	7.32	7.19	7.24	7.25	7.27	7.29	7.24	7.44	7.51	7.23	7.44	7.52	7.5	7.26	7.27	7.32	7.37	7.23	7.36	7.26	7.29	7.25	7.31	7.36	7.25	7.29	7.27	7.31	7.37	7.24	7.22	7.33	7.26	7.35	7.29	7.42	7.27	7.28
0epFCF9XQSKEeJUGi8	11.54	11.82	10.71	12.55	11.65	9.89	10.16	11.56	10.31	9.6	11.16	11.66	10.38	11.04	10.4	11.59	11.31	11.91	11.65	10.64	10.78	10.83	12.13	12.85	11.66	10.54	11.15	11.52	11.41	10.46	11.47	10.72	11.01	11.16	10.71	11.23	11.55	10.84	11.21	10.68	11.19	11.43	9.62	10.76	10.7	11.26	11.05	11.6	11.71
0epQiIIUnenCa6UIs4	7.24	7.24	7.24	7.29	7.27	7.22	7.23	7.24	7.27	7.26	7.28	7.2	7.24	7.38	7.3	7.22	7.24	7.22	7.22	7.22	7.23	7.21	7.23	7.17	7.18	7.22	7.22	7.3	7.25	7.27	7.29	7.29	7.22	7.26	7.18	7.18	7.28	7.34	7.25	7.29	7.34	7.2	7.24	7.29	7.26	7.24	7.2	7.23	7.33
0Eprml1CdXCNcttYA0	13.95	14.31	14.18	14.2	13.75	14.11	13.6	14.43	13.62	14.41	14.22	13.95	13.92	14	14.28	13.76	13.6	13.65	14.11	14.03	14.02	13.84	12.87	13.9	13.4	13.67	14.32	13.66	13.87	13.59	14.01	14.29	14.03	13.55	14.05	13.41	13.96	13.66	14.27	13.32	14.06	13.39	14.01	13.88	14.33	13.59	13.9	13.93	13.94
0epSD9AaXRyn3r45e4	8.18	7.58	7.27	7.52	7.65	7.57	7.75	8.54	7.64	8.02	7.7	7.79	7.73	7.55	7.55	8.1	7.41	7.47	7.49	7.48	7.75	8.95	8.96	8.79	9.03	7.75	8.04	8.24	8.47	8.05	8.19	7.47	8.36	8.2	7.69	7.92	8.82	8.6	8.16	8.3	7.77	7.76	7.39	8.02	7.54	8.33	7.81	8.04	8.1
0eQCMUI896816OU.QM	7.82	8.44	8.53	8.48	8.41	8.06	7.67	7.82	8.4	9.35	8.05	7.97	7.87	9.93	8.75	8.6	8.03	7.38	7.24	7.18	7.26	7.2	7.2	7.16	7.14	7.44	8.39	7.29	7.21	7.21	7.26	7.28	7.25	7.27	8.24	7.14	8.09	7.48	7.1	7.25	7.18	8.51	10.23	8.83	8.99	7.19	7.14	7.23	7.73
0eqhH9idUnUn23Rfi8	8.45	8.18	7.61	8.37	8.06	8.06	9.36	9.36	7.99	8.01	8.92	9.57	7.77	8.21	7.79	8.17	8.95	7.7	8.39	8.13	8.6	10.25	9.56	9.65	10.36	8.79	9.34	9.72	9.92	9.3	9	8.61	10.03	10.14	8.42	9.49	9.95	8.65	9.45	8.95	8.41	9.37	7.76	9.66	7.87	10.22	8.38	9.51	9.91
0Eqki4vrd6Lh7n.UV0	7.35	7.22	7.19	7.23	7.28	7.29	7.26	7.28	7.27	7.26	7.24	7.27	7.34	7.23	7.35	7.29	7.37	7.27	7.27	7.19	7.25	7.21	7.27	7.18	7.2	7.41	7.26	7.6	7.35	7.35	7.52	7.36	7.31	7.26	7.41	7.23	7.34	7.39	7.3	7.43	7.37	7.32	7.21	7.39	7.15	7.31	7.33	7.34	7.24
0eqkpnufe4rr8n.n9g	8.49	7.93	8.09	8.11	7.77	7.92	9	8.75	8.16	8.33	8.23	8.11	8.03	8.02	8.4	8.21	8.1	8.61	7.75	8.02	8.14	8.76	8.39	8.69	8.92	8.09	9.23	7.98	8.57	8.78	8.1	8.61	9.14	9.28	8.62	8.7	9.01	8.82	8.91	8.67	8.35	8.64	7.9	8.26	7.99	8.14	8.53	8.67	8.37
0eqLCKI75RUfXqTAlI	7.26	7.26	7.34	7.37	7.28	7.21	7.22	7.26	7.26	7.26	7.25	7.18	7.22	7.21	7.28	7.2	7.18	7.24	7.22	7.28	7.25	7.2	7.25	7.17	7.21	7.25	7.16	7.21	7.26	7.25	7.21	7.27	7.21	7.24	7.28	7.19	7.19	7.19	7.24	7.28	7.18	7.23	7.2	7.19	7.25	7.2	7.24	7.2	7.2
0eqPSQSu3GqKluTXcc	7.41	7.4	7.4	7.39	7.39	7.3	7.41	7.3	7.3	7.39	7.39	7.27	7.32	7.31	7.41	7.37	7.35	7.44	7.24	7.49	7.3	7.24	7.31	7.27	7.31	7.36	7.3	7.35	7.22	7.36	7.3	7.45	7.35	7.33	7.31	7.49	7.33	7.27	7.32	7.33	7.45	7.38	7.47	7.27	7.22	7.22	7.29	7.38	7.21
0EQTYgSNrXAarO0gB4	7.33	7.28	7.23	7.32	7.35	7.27	7.32	7.29	7.28	7.29	7.21	7.11	7.29	7.37	7.34	7.26	7.29	7.11	7.24	7.19	7.27	7.42	7.25	7.28	7.27	7.29	7.25	7.31	7.29	7.33	7.38	7.38	7.33	7.32	7.28	7.29	7.28	7.38	7.33	7.28	7.3	7.26	7.33	7.33	7.29	7.27	7.25	7.26	7.36
0eQuXihSLpdyVYPgR8	7.39	7.49	7.53	7.39	7.73	7.91	7.8	7.83	7.42	7.63	7.67	7.55	7.54	7.71	7.45	7.43	7.76	7.54	7.79	7.84	7.75	8.02	8.11	7.33	7.62	7.63	7.58	8.3	7.61	7.92	7.82	7.59	7.92	7.76	7.48	7.86	7.62	7.58	7.52	7.75	7.75	7.61	7.53	7.69	7.41	7.85	7.89	7.89	7.55
0erfqgPGDF6_CpLXSk	7.33	7.28	7.3	7.27	7.31	7.26	7.29	7.3	7.3	7.25	7.35	7.23	7.31	7.23	7.28	7.27	7.32	7.34	7.21	7.22	7.23	7.28	7.19	7.18	7.23	7.31	7.3	7.34	7.29	7.34	7.29	7.29	7.33	7.27	7.3	7.28	7.28	7.31	7.3	7.34	7.33	7.32	7.26	7.29	7.24	7.28	7.23	7.32	7.25
0ertUX_18Rt8TdSvOU	7.43	7.27	7.25	7.3	7.27	7.34	7.42	7.37	7.24	7.43	7.46	7.56	7.29	7.28	7.27	7.49	7.57	7.5	7.38	7.58	7.51	7.72	7.61	7.72	7.3	7.32	7.34	7.19	7.34	7.28	7.31	7.21	7.27	7.28	7.51	7.39	7.41	7.19	7.23	7.27	7.25	7.36	7.51	7.43	7.5	7.43	7.43	7.26	7.32
0eS_5JIoh5Ifa_KAas	7.19	7.24	7.21	7.31	7.27	7.15	7.39	7.42	7.27	7.2	7.11	7.31	7.28	7.26	7.24	7.28	7.27	7.11	7.2	7.19	7.18	7.18	7.2	7.17	7.19	7.15	7.31	7.44	7.21	7.19	7.41	7.15	7.22	7.16	7.47	7.19	7.33	7.32	7.26	7.26	7.22	7.35	7.44	7.35	7.14	7.29	7.19	7.36	7.26
0eSETEQVv55IloVLpw	8	7.74	7.81	7.6	8.34	7.35	8.54	7.6	8.34	7.61	8.76	7.73	7.64	8.48	7.48	8.31	7.91	7.54	7.39	7.61	7.21	7.19	7.19	8.38	7.41	7.5	7.95	7.78	8.33	7.98	7.65	7.51	7.25	8.02	7.7	7.46	7.5	8.47	7.67	8.22	8.17	8.29	8.47	7.86	7.63	8.45	7.77	8.71	7.64
0eSgirzev87RXFwReo	7.28	7.59	7.18	7.18	7.19	8.87	7.65	7.21	7.17	7.19	7.26	7.58	7.42	8.24	7.68	7.29	7.59	7.13	7.9	7.17	7.32	7.17	7.17	7.14	7.19	7.81	7.36	7.17	7.78	7.62	7.18	7.24	7.29	7.61	8.03	7.56	7.58	7.98	7.42	7.19	7.51	7.27	7.26	7.45	7.25	7.79	8.05	7.76	7.56
0eSJy._wlOwyNflP3E	7.24	7.26	7.18	7.25	7.27	7.26	7.24	7.22	7.33	7.25	7.27	7.24	7.24	7.1	7.26	7.22	7.22	7.23	7.22	7.32	7.21	7.51	7.27	7.36	7.28	7.3	7.24	7.28	7.22	7.25	7.26	7.31	7.33	7.27	7.16	7.23	7.23	7.47	7.42	7.2	7.26	7.23	7.25	7.26	7.27	7.27	7.19	7.22	7.37
0eSKSH3vKAKL0heIkU	7.2	7.18	7.17	7.14	7.12	7.16	7.19	7.17	7.21	7.18	7.18	7.14	7.15	7.11	7.18	7.16	7.15	7.16	7.19	7.18	7.2	7.2	7.21	7.18	7.19	7.16	7.19	7.19	7.2	7.16	7.12	7.15	7.21	7.19	7.13	7.22	7.18	7.18	7.21	7.18	7.13	7.2	7.14	7.22	7.12	7.22	7.2	7.19	7.15
0eSQ16lE.XzrhH69JU	7.16	7.18	7.21	7.13	7.13	7.16	7.21	7.21	7.13	7.15	7.12	7.08	7.18	7.19	7.17	7.15	7.18	7.12	7.21	7.19	7.19	7.2	7.2	7.16	7.2	7.22	7.14	7.2	7.2	7.2	7.18	7.14	7.11	7.19	7.14	7.17	7.16	7.19	7.19	7.19	7.18	7.18	7.2	7.25	7.17	7.17	7.2	7.18	7.22
0etB3CjhIR7sEEXq0E	7.19	7.23	7.11	7.25	7.14	7.24	7.21	7.26	7.21	7.24	7.17	7.21	7.24	7.25	7.23	7.24	7.21	7.1	7.13	7.17	7.21	7.17	7.18	7.17	7.16	7.15	7.19	7.17	7.16	7.16	7.18	7.16	7.13	7.16	7.22	7.2	7.19	7.19	7.17	7.18	7.18	7.22	7.25	7.21	7.3	7.16	7.17	7.26	7.2
0EU0kqpFRTkRe3aLKQ	8.42	8.5	7.86	8.44	7.8	7.67	7.72	7.85	7.97	8.21	7.56	7.79	7.71	7.8	7.61	7.84	8	7.53	7.95	7.91	8.09	8.23	8.67	8.68	8.82	8.01	7.87	8.87	8.01	8.47	8.68	8.39	8.39	7.83	7.63	8.11	8.21	8.06	8.48	7.78	8.24	7.81	7.57	8.04	7.6	8.24	7.74	8.37	8.96
0eU37neU30Je6ffK_4	7.19	7.1	7.19	7.18	7.19	7.18	7.18	7.21	7.23	7.23	7.26	7.21	7.21	7.18	7.2	7.22	7.16	7.19	7.21	7.22	7.22	7.39	7.39	7.32	7.3	7.17	7.2	7.14	7.43	7.22	7.23	7.21	7.19	7.21	7.13	7.25	7.24	7.17	7.17	7.21	7.15	7.16	7.28	7.18	7.2	7.22	7.24	7.16	7.13
0euexeCulice11peQI	7.23	7.25	7.15	7.2	7.28	7.23	7.2	7.24	7.27	7.23	7.23	7.23	7.18	7.28	7.19	7.18	7.24	7.27	7.19	7.21	7.2	7.2	7.21	7.17	7.2	7.27	7.22	7.19	7.22	7.26	7.2	7.14	7.27	7.2	7.23	7.17	7.22	7.26	7.24	7.24	7.19	7.2	7.36	7.24	7.24	7.19	7.34	7.2	7.17
0EUieI7J6juStS4lJ4	7.21	7.24	7.23	7.28	7.24	7.21	7.26	7.21	7.21	7.19	7.21	7.27	7.15	7.17	7.24	7.24	7.23	7.28	7.19	7.19	7.21	7.19	7.25	7.46	7.21	7.24	7.2	7.19	7.21	7.23	7.23	7.24	7.23	7.22	7.22	7.29	7.18	7.24	7.27	7.22	7.26	7.19	7.23	7.14	7.2	7.16	7.2	7.27	7.36
0euR.sD1eqAH5Jwoqg	8.66	8.55	8.13	7.37	7.66	7.35	7.49	7.38	7.64	7.29	7.97	7.48	8.19	7.74	7.74	8.2	7.79	7.49	7.27	7.84	7.25	7.3	8.86	7.17	7.22	7.36	7.75	7.55	7.3	7.31	8.14	7.65	7.4	7.43	7.86	7.24	8.82	7.56	7.4	7.49	7.41	7.98	7.63	7.37	7.75	7.38	7.23	7.38	7.34
0eUs8oFfVSVMUKRUDs	7.25	7.37	7.31	7.28	7.27	7.28	7.68	7.27	7.35	7.28	7.22	7.29	7.3	7.25	7.46	7.37	7.25	8.98	7.26	7.7	7.46	7.29	7.28	7.39	7.35	7.24	7.25	7.24	7.21	7.22	7.2	7.21	7.26	7.32	7.2	7.41	7.26	7.24	7.18	7.66	7.53	7.43	7.26	7.26	7.68	7.41	7.26	7.25	7.31
0euSsLpXiEs76gOeGw	8.89	8.31	9.34	8	8.03	7.88	8.06	8.01	8.68	8.59	8.28	8.27	8.86	7.67	9.48	8.98	7.8	7.28	7.78	8.66	7.78	7.64	7.98	8.98	8.43	8.33	7.86	9.06	7.93	8.38	8	9.75	7.6	8.23	9.35	7.83	7.75	9.14	7.97	8.1	7.86	9.04	8.5	7.6	9.55	8.21	7.79	7.68	7.7
0Euw6ijeAr6FaiqyeU	7.48	7.23	7.25	7.31	7.5	7.25	7.26	7.34	7.59	7.29	7.14	7.23	7.28	7.28	7.25	7.29	7.26	10.1	7.22	7.18	7.2	7.29	7.16	7.18	7.15	7.2	7.25	7.65	7.21	7.21	7.25	7.2	7.24	7.32	7.26	7.19	7.26	7.17	7.15	7.31	7.63	7.24	7.27	7.31	7.5	7.17	7.24	7.22	7.21
0eV7n7qeQurdQwuvU4	11.06	12.06	12.52	12.3	12.02	12.03	11.6	12.35	11.49	12.48	10.08	12.01	12.87	11.09	12.52	11.69	11.68	10.2	11.57	12.06	10.51	8.73	12.09	11.88	11.1	11.86	10.96	12.28	10.91	11.76	11.29	11.19	8.83	12.01	11.93	11.79	10.62	11.64	11.45	11.73	11.58	12.63	11.64	11.94	11.43	10.85	10.17	12.7	11.2
0EVCCcqBJfeaaol0CA	8.69	8.21	8.28	8.33	8.1	8.38	8.03	7.98	8.24	8.49	7.62	7.99	8.14	8.22	8.03	7.97	7.94	7.96	8.21	7.87	8.69	8.18	8.36	8.08	8.2	8.37	7.86	7.97	8.62	8.05	7.9	7.69	7.91	8.1	7.82	8.22	7.83	8.17	8.12	8.31	8.08	7.75	7.87	7.9	7.73	7.84	8.03	8.32	7.93
0evfS558c.6wepf36o	9.26	9.62	9.58	9.05	9.31	10.02	10.2	10.21	9.89	10.2	9.34	10.07	10.26	9.6	9.92	9.7	10.35	9.46	9.59	10.07	9.26	9.67	10.7	9.41	10.12	10.35	10.8	9.84	10.05	9.75	9.82	10.3	10.28	10.42	10.41	10.33	11.44	10.47	10.14	10.17	9.95	10.62	9.58	10.65	9.18	10.06	10.04	10	10.1
0ew8nUbsVX0dXVFJ3k	8.09	8.08	7.65	7.92	7.76	8.1	7.67	8.24	7.57	7.49	7.93	7.86	7.88	7.47	7.55	7.71	9.98	7.74	8.16	7.72	7.55	7.75	9.39	8.25	8.51	7.66	8.07	7.83	8.2	7.66	9.15	7.71	8.55	8.31	7.56	7.56	8.33	7.55	8.36	7.73	7.76	7.56	7.38	8.28	7.81	8.49	7.44	8.33	8.08
0ewiElXf.dUsyZ.a6U	7.14	7.21	7.18	7.23	7.18	7.11	7.21	7.16	7.23	7.17	7.22	7.22	7.2	7.18	7.15	7.18	7.18	7.18	7.22	7.19	7.2	7.2	7.17	7.18	7.19	7.2	7.22	7.24	7.2	7.16	7.15	7.18	7.25	7.23	7.18	7.18	7.19	7.26	7.19	7.2	7.23	7.13	7.23	7.17	7.22	7.16	7.2	7.25	7.28
0eX1fo17r_KOityhbo	7.15	7.21	7.18	7.2	7.2	7.28	7.23	7.24	7.22	7.23	7.19	7.18	7.19	7.21	7.28	7.2	7.21	7.2	7.23	7.22	7.23	7.21	7.29	7.16	8.25	7.17	7.24	7.26	7.22	7.19	7.17	7.14	7.63	7.15	7.22	7.2	7.62	7.18	7.34	7.24	7.15	7.21	7.29	7.78	7.22	7.2	7.29	7.17	7.24
0ex69UInPT1ecXj9JE	8.73	8.54	9.78	9.23	8.57	9.59	9.43	7.83	8.9	9.02	8.71	8.68	10.59	8.18	10.66	8.6	9.46	9.72	9.16	8.85	8.6	9.45	7.26	8.55	7.94	8.52	8.5	8.83	8.36	8.35	8.79	9.28	8.99	9.08	8.14	9.9	7.59	8.48	9.23	9.39	9.58	9.23	9.9	9.29	9.11	8.9	9.41	8.45	9.01
0eX8jXiCioDiq54RLU	7.61	7.55	7.59	7.57	7.49	7.53	7.52	7.53	7.63	7.55	7.42	7.52	7.43	7.57	7.48	7.77	7.47	7.56	7.46	7.49	7.49	7.2	7.34	7.4	7.44	7.57	7.41	7.66	7.39	7.58	7.37	7.59	7.57	7.6	7.55	7.32	7.54	7.52	7.47	7.5	7.56	7.36	7.58	7.65	7.39	7.38	7.38	7.66	7.54
0exLTuUbBJt6tLhoR8	9.97	9.55	9.12	9.74	9.53	9.75	9.93	9.59	9.49	10.44	9.57	9.86	9.36	10.34	9.47	9.66	9.5	8.8	9.52	9.05	9.28	9.31	8.84	8.99	8.76	9.88	9.27	9.53	8.94	9.27	9.47	9.15	9.5	8.86	9.48	9.38	9.3	9.19	9.53	9.27	9.46	9.67	9.83	9.46	10.16	9.05	9.42	9.18	9.51
0eXueeouS47e6J7IqA	7.11	7.22	7.19	7.13	7.16	7.26	7.21	7.19	7.23	7.22	7.18	7.2	7.17	7.25	7.19	7.17	7.18	7.14	7.19	7.17	7.18	7.17	7.18	7.14	7.16	7.17	7.22	7.19	7.16	7.22	7.22	7.15	7.17	7.13	7.21	7.14	7.22	7.26	7.18	7.2	7.21	7.16	7.25	7.18	7.21	7.13	7.18	7.21	7.26
0eXUpVYvoYkfroCJR0	7.14	7.21	7.19	7.25	7.18	7.29	7.18	7.23	7.19	7.27	7.27	7.2	7.16	7.2	7.21	7.24	7.23	7.2	7.26	7.25	7.21	7.19	7.19	7.2	7.21	7.23	7.25	7.14	7.24	7.21	7.12	7.18	7.24	7.14	7.17	7.27	7.23	7.15	7.18	7.22	7.22	7.12	7.19	7.21	7.23	7.33	7.34	7.21	7.17
0eXX6AncTdfuPou6v0	7.34	7.53	7.32	7.26	7.34	7.37	7.52	7.28	7.23	7.31	7.28	7.13	7.37	7.28	7.29	7.29	7.45	7.32	7.26	7.26	7.22	7.36	7.21	7.2	7.37	7.32	7.47	7.67	7.24	7.46	7.32	7.28	7.26	7.52	7.61	7.78	7.32	7.42	7.36	7.31	7.44	7.55	7.35	7.31	7.36	7.18	7.49	7.32	7.5
0eyFeu.3_C5XdcOSKU	7.72	7.65	7.16	7.74	7.22	7.69	7.24	7.69	7.44	7.21	7.28	7.36	7.38	7.3	7.37	7.3	7.94	7.2	7.96	7.17	7.88	9.27	7.17	7.18	7.18	7.33	7.63	7.32	7.19	7.36	7.56	7.14	8.02	7.87	7.22	7.57	7.39	7.14	7.93	7.24	7.35	7.24	7.21	7.82	7.39	8.2	7.23	7.55	7.69
0eyOe_OOU9QnwNf10Q	7.21	7.45	7.32	7.28	7.62	7.41	7.25	7.39	7.42	7.35	7.26	7.25	7.29	7.31	7.21	7.22	7.27	7.15	7.19	7.18	7.2	7.21	7.21	7.24	7.16	7.61	7.37	7.27	7.18	7.24	7.3	7.17	7.2	7.09	7.52	7.2	7.6	7.34	7.27	7.18	7.22	7.42	7.54	7.28	7.16	7.2	7.18	7.15	7.3
0ez8KsJVEmpJEBJeok	7.25	7.18	7.25	7.18	7.2	7.22	7.16	7.17	7.2	7.23	7.23	7.18	7.21	7.19	7.22	7.13	7.23	7.2	7.18	7.19	7.2	7.21	7.19	7.16	7.19	7.21	7.17	7.18	7.19	7.21	7.14	7.2	7.16	7.14	7.19	7.15	7.24	7.22	7.2	7.14	7.13	7.2	7.31	7.22	7.23	7.18	7.16	7.08	7.22
0f.dUH2UdJV5e7T1Fk	7.24	7.41	7.49	7.5	7.44	7.31	7.26	7.31	7.57	7.43	7.36	7.46	7.31	7.33	7.29	7.4	7.36	8.01	7.31	7.36	7.23	7.23	7.27	7.27	7.27	7.27	7.35	7.28	7.41	7.3	7.27	7.24	7.5	7.59	7.4	7.22	7.29	7.27	7.31	7.3	7.76	7.29	7.25	7.36	7.56	7.42	7.42	7.25	7.35
0f.heVxNILRYnVJeSU	8.53	8.64	8.72	9.08	10.13	8.68	8.69	8.85	8.75	8.68	9.48	8.78	8.46	9.52	8.57	8.02	8.26	8.27	9.26	8.94	9.12	8.97	9	9.15	9.18	10.32	8.74	9.48	9.07	9.54	9.12	9.04	9.62	9.24	8.17	9.01	8.5	8.58	8.83	9.04	9.46	8.85	9.07	8.62	8.74	9.03	9.22	10.09	8.68
0f0L8.IRB6LVGrrF44	7.27	7.19	7.2	7.16	7.2	7.18	7.18	7.17	7.16	7.16	7.14	7.18	7.24	7.31	7.14	7.17	7.16	7.18	7.22	7.29	7.2	7.21	7.18	7.18	7.2	7.19	7.19	7.11	7.21	7.13	7.2	7.16	7.18	7.25	7.22	7.23	7.2	7.14	7.21	7.2	7.13	7.16	7.27	7.15	7.16	7.21	7.16	7.12	7.09
0f0q6kqLoAqog8ogSI	7.38	7.35	7.38	7.39	7.41	7.42	7.44	7.36	7.44	7.41	7.52	7.31	7.45	7.37	7.42	7.34	7.37	7.38	7.74	7.78	7.68	7.9	7.96	8.09	7.85	7.48	7.4	7.55	7.47	7.46	7.56	7.61	7.51	7.56	7.39	7.64	7.35	7.33	7.47	7.41	7.47	7.48	7.41	7.43	7.32	7.57	7.79	7.53	7.45
0F1H193lU_XVAznOic	7.5	7.59	7.75	7.6	8.54	8.27	7.8	7.95	7.45	8.33	7.5	7.64	7.88	7.6	7.65	7.46	7.77	7.64	8.37	7.34	8.02	7.56	8.25	7.94	7.9	9.19	7.82	8.27	8.3	8.64	8.46	8.06	7.89	7.95	7.5	8.03	7.8	8.05	8.12	8.42	8.07	7.8	7.95	7.77	7.44	7.97	8.14	7.85	7.85
0F1xDV6QnookleQUJc	7.2	7.21	7.21	7.15	7.22	7.17	7.19	7.19	7.11	7.24	7.15	7.25	7.24	7.25	7.19	7.21	7.27	7.25	7.22	7.18	7.21	7.23	7.19	7.17	7.19	7.06	7.19	7.21	7.19	7.19	7.17	7.14	7.23	7.19	7.19	7.29	7.24	7.18	7.18	7.18	7.17	7.23	7.17	7.2	7.3	7.23	7.17	7.08	7.17
0f2qET0BRKIB0D716k	7.29	7.24	7.3	7.22	7.27	7.24	7.22	7.25	7.29	7.26	7.27	7.22	7.27	7.18	7.24	7.26	7.29	7.29	7.23	7.2	7.21	7.17	7.19	7.17	7.23	7.24	7.22	7.33	7.14	7.31	7.33	7.24	7.33	7.25	7.28	7.17	7.25	7.25	7.25	7.26	7.36	7.25	7.12	7.27	7.24	7.19	7.18	7.24	7.21
0F3U1STsX7_Pfdee3k	7.29	7.38	7.4	7.41	7.42	7.29	7.27	7.33	7.4	7.4	7.4	7.41	7.32	7.33	7.35	7.33	7.3	7.34	7.36	7.3	7.48	7.25	7.21	7.22	7.21	7.32	7.35	7.24	7.31	7.27	7.24	7.26	7.34	7.38	7.32	7.33	7.37	7.26	7.29	7.24	7.29	7.36	7.45	7.51	7.54	7.41	7.4	7.28	7.4
0F4ut0Sq.osI9MXn0U	7.27	7.3	7.27	7.35	7.26	7.32	7.31	7.36	7.29	7.27	7.14	7.23	7.33	7.26	7.27	7.32	7.25	7.22	7.23	7.28	7.24	7.19	7.22	7.18	7.22	7.25	7.27	7.3	7.25	7.31	7.31	7.28	7.41	7.38	7.29	7.18	7.22	7.34	7.29	7.29	7.45	7.32	7.24	7.23	7.18	7.21	7.18	7.26	7.35
0F5AK5g5yBiIOeB6DU	7.16	7.16	7.2	7.19	7.19	7.15	7.15	7.2	7.17	7.09	7.22	7.2	7.15	7.18	7.16	7.16	7.19	7.16	7.18	7.27	7.26	7.2	7.21	7.17	7.19	7.15	7.2	7.17	7.21	7.19	7.1	7.11	7.18	7.16	7.16	7.34	7.06	7.11	7.19	7.21	7.09	7.2	7.23	7.15	7.2	7.22	7.26	7.19	7.16
0F5chLBl.cX6XlPyq0	7.47	7.38	7.44	7.39	7.42	7.44	7.37	7.42	7.38	7.46	7.3	7.34	7.41	7.51	7.39	7.41	7.36	7.39	7.45	7.37	7.45	7.41	7.29	7.48	7.42	7.41	7.42	7.39	7.46	7.42	7.31	7.38	7.45	7.46	7.42	7.42	7.36	7.41	7.44	7.35	7.41	7.35	7.45	7.46	7.41	7.36	7.5	7.38	7.42
0f5fTl0onQeNGn9GEo	7.26	7.24	7.22	7.22	7.28	7.29	7.34	7.25	7.19	7.25	7.28	7.33	7.23	7.27	7.25	7.25	7.29	7.19	7.27	7.33	7.3	7.24	7.35	7.35	7.45	7.24	7.31	7.27	7.23	7.24	7.25	7.26	7.28	7.26	7.23	7.27	7.22	7.26	7.23	7.29	7.3	7.27	7.17	7.27	7.32	7.56	7.37	7.34	7.28
0f5IJ_kYp6CD2aWC6c	7.18	7.18	7.14	7.18	7.19	7.22	7.24	7.17	7.16	7.16	7.14	7.23	7.21	7.28	7.19	7.15	7.19	7.18	7.19	7.19	7.25	7.2	7.19	7.18	7.2	7.25	7.21	7.26	7.16	7.21	7.25	7.2	7.22	7.39	7.13	7.18	7.18	7.36	7.19	7.28	7.3	7.22	7.2	7.2	7.22	7.13	7.14	7.3	7.26
0F5QgBNT3klTo0KDD8	7.23	7.19	7.14	7.18	7.15	7.18	7.18	7.16	7.2	7.23	7.24	7.15	7.08	7.16	7.28	7.21	7.18	7.26	7.19	7.19	7.2	7.17	7.17	7.22	7.19	7.08	7.27	7.18	7.18	7.16	7.13	7.12	7.23	7.07	7.21	7.19	7.2	7.18	7.17	7.19	7.16	7.28	7.2	7.15	7.3	7.21	7.22	7.12	7.13
0f5XRzfojuCLjeynIk	7.09	7.22	7.19	7.1	7.11	7.22	7.13	7.15	7.2	7.37	7.25	7.18	7.22	7.19	7.15	7.1	7.13	7.17	7.22	7.17	7.18	7.2	7.2	7.18	7.19	7.17	7.11	7.23	7.18	7.3	7.16	7.13	7.13	7.2	7.1	7.2	7.26	7.12	7.16	7.2	7.16	7.15	7.15	7.22	7.19	7.19	7.18	7.14	7.18
0f6eJOyABazSYOSuCY	7.12	7.17	7.13	7.14	7.12	7.11	7.09	7.05	7.11	7.1	7.09	7.17	7.16	7.12	7.12	7.07	7.12	7.13	7.19	7.2	7.19	7.2	7.19	7.19	7.19	7.16	7.14	7.15	7.17	7.17	7.14	7.17	7.15	7.15	7.13	7.19	7.13	7.2	7.23	7.17	7.13	7.13	7.1	7.11	7.12	7.14	7.15	7.2	7.21
0F7.UNV7XCRSkzEUWE	7.22	7.13	7.11	7.12	7.2	7.2	7.16	7.16	7.13	7.21	7.17	7.15	7.23	7.15	7.2	7.18	7.17	7.2	7.15	7.17	7.19	7.13	7.14	7.15	7.16	7.1	7.19	7.15	7.17	7.15	7.16	7.17	7.18	7.11	7.25	7.12	7.2	7.23	7.17	7.21	7.13	7.13	7.12	7.2	7.26	7.12	7.15	7.19	7.17
0F7dQlIuukBUiFCCpI	7.21	7.24	7.15	7.18	7.25	7.26	7.19	7.22	7.21	7.21	7.2	7.24	7.15	7.21	7.3	7.19	7.24	7.15	7.17	7.18	7.2	7.18	7.19	7.16	7.13	7.2	7.19	7.21	7.17	7.22	7.25	7.18	7.2	7.22	7.21	7.16	7.15	7.33	7.2	7.26	7.26	7.16	7.2	7.3	7.26	7.16	7.15	7.27	7.29
0f7I_ve76sdfQ6TtKU	7.12	7.15	7.18	7.15	7.17	7.17	7.12	7.13	7.16	7.13	7.18	7.14	7.18	7.17	7.17	7.15	7.14	7.07	7.23	7.19	7.2	7.19	7.2	7.18	7.2	7.18	7.18	7.21	7.23	7.16	7.2	7.14	7.17	7.18	7.22	7.19	7.13	7.15	7.16	7.18	7.13	7.18	7.28	7.11	7.1	7.18	7.17	7.16	7.17
0f87t0gz.4pgpt7d_k	7.75	7.4	7.24	7.5	7.25	7.96	7.18	7.92	7.28	7.15	7.21	7.44	7.56	7.18	7.72	7.26	8	9.83	7.28	7.17	7.23	7.17	7.14	7.15	7.17	7.15	7.53	7.13	7.2	7.13	7.16	7.21	7.19	7.34	7.14	7.2	7.24	7.18	7.26	7.15	7.57	7.2	7.18	7.26	8.55	7.16	7.21	7.18	7.69
0F9eQ6VfH_hJBV4lQk	7.23	7.23	7.14	7.17	7.23	7.23	7.16	7.2	7.25	7.25	7.22	7.27	7.19	7.14	7.2	7.25	7.21	7.24	7.2	7.19	7.25	7.2	7.19	7.17	7.19	7.2	7.25	7.18	7.18	7.17	7.16	7.27	7.18	7.18	7.24	7.19	7.25	7.19	7.24	7.18	7.19	7.26	7.23	7.23	7.24	7.21	7.18	7.27	7.18
0f9QvVClxJ4JXysXu8	7.46	7.35	7.48	8.39	7.52	7.28	8.38	8.33	8.01	7.24	8.11	8.36	7.78	7.52	7.24	7.6	7.47	9.39	7.71	7.71	7.97	7.83	7.59	8.19	8.05	7.52	8.03	7.42	7.54	7.71	7.43	7.62	7.39	8.08	7.36	7.74	7.7	7.43	7.66	7.43	7.65	7.53	7.55	7.43	7.54	7.69	7.32	7.77	7.6
0f9SUSP30Su6u1buak	7.27	7.21	7.17	7.16	7.27	7.24	7.19	7.2	7.25	7.19	7.2	7.26	7.19	7.22	7.31	7.21	7.21	7.25	7.19	7.21	7.23	7.23	7.2	7.22	7.22	7.21	7.23	7.17	7.21	7.24	7.29	7.21	7.14	7.17	7.22	7.3	7.27	7.22	7.17	7.2	7.21	7.28	7.25	7.21	7.25	7.19	7.2	7.2	7.19
0fA0l9ZD07L96t96iU	8.35	9.28	9.15	8.74	8.75	9.14	8.53	8.38	9.71	9.53	9.44	8.63	8.52	8.84	8.77	9.51	9.19	8.34	9.33	9.9	9.64	8.87	8.91	8.87	8.46	8.51	9.09	9.16	8.48	8.81	8.63	9.7	8.94	9.31	9.38	10.13	8.84	9.78	8.54	8.96	9.56	9.27	9.25	8.8	9.53	9.57	9.86	8.54	8.75
0FAefq_k1a37T8UlO4	7.09	7.12	7.12	7.1	7.11	7.16	7.04	7.21	7.08	7.03	7.07	7.09	7.15	7.08	7.07	7.08	7.06	7.07	7.11	7.17	7.15	7.09	7.09	7.1	7.1	7.06	7.1	7.02	7.14	7.03	7.09	7.07	7.06	7.12	7.11	7.09	7.08	7.08	7.04	7.12	7.11	7.06	7.06	7.12	7.16	7.11	7.1	7.05	7.07
0fALpoCxD8hTiDCEg0	7.15	7.13	7.13	7.09	7.12	7.08	7.06	7.11	7.04	7.06	7.03	7.12	7.1	7.05	7.09	7.08	7.05	7.07	7.09	7.16	7.17	7.11	7.08	7.13	7.08	7.05	7.03	7.03	7.1	7.06	7.11	7.11	7.09	7.07	7.05	7.1	7.07	7.11	7.07	7.14	7.16	7.03	7.06	7.07	7.07	7.04	7.12	7.12	7.11
0FC4oIVBf4IQV4Ll1k	8.32	8.39	7.58	7.62	7.77	7.4	7.68	7.58	7.41	8.23	7.75	7.76	7.78	7.82	8	8.1	8.4	8.07	7.61	8.05	7.82	7.47	8.36	7.82	8.35	7.46	7.94	7.48	7.68	7.93	8.12	7.86	8.3	7.74	7.88	8.39	8.33	7.63	7.95	7.72	7.7	7.87	7.51	8.07	7.51	7.65	8.77	7.83	8.4
0FCogUoBoBIutPVSVo	9.36	9.23	9.15	9.59	9.73	9.4	12.03	9.88	9.85	9.08	9.33	11.6	9.54	10.21	8.91	9.3	9.22	9.33	9.69	11.32	9.78	9.52	11.31	11.35	10.69	10.34	9.82	9.79	9.99	10.06	9.78	9.76	10.03	10.28	9.43	9.79	9.31	9.64	10.12	12.17	11.14	9.65	9.46	9.75	10.4	10.65	10.13	9.9	9.92
0fd3UfZTn1H9VNFS1U	7.2	7.2	7.24	7.33	7.2	7.2	7.17	7.15	7.25	7.26	7.13	7.19	7.19	7.29	7.23	7.2	7.23	7.23	7.24	7.25	7.21	7.22	7.25	7.18	7.34	7.22	7.19	7.19	7.42	7.21	7.18	7.19	7.22	7.26	7.21	7.3	7.23	7.22	7.24	7.19	7.15	7.2	7.26	7.19	7.21	7.31	7.39	7.19	7.2
0fdJdTC7upS9lwwNV0	7.89	7.54	7.61	7.95	7.62	7.79	7.49	7.63	8.09	7.68	7.51	7.69	7.67	7.82	7.72	7.48	7.82	7.67	7.83	7.55	7.91	7.43	7.51	7.17	7.28	7.65	7.7	7.69	7.88	7.66	7.87	8.17	8.6	7.82	7.58	7.46	7.62	7.72	8.07	7.88	7.84	7.63	7.36	7.66	7.65	7.48	7.38	7.76	8.23
0FDqSZUrhVqh1HeXXQ	7.34	7.37	7.4	7.45	7.36	7.3	7.26	7.29	7.35	7.32	7.32	7.3	7.4	7.27	7.32	7.34	7.33	7.37	7.25	7.21	7.23	7.22	7.22	7.18	7.34	7.32	7.29	7.26	7.27	7.19	7.32	7.33	7.35	7.27	7.28	7.32	7.38	7.29	7.28	7.31	7.28	7.29	7.28	7.29	7.34	7.21	7.29	7.36	7.33
0feG79d3wp.dcVaSOE	7.84	8.02	7.6	7.53	8.53	8.36	8.17	7.88	7.95	7.98	8.38	8.32	8.46	8.86	8.48	8.01	8.32	8.14	8.81	8.49	8.33	8.01	7.21	7.19	7.98	9.03	7.81	8.07	7.79	8.31	7.95	7.67	9.57	8.11	7.98	8.36	7.75	7.83	7.96	8.47	8.25	8.06	8.38	7.79	9.03	8.73	8.89	7.63	8.11
0fFkRXA1KV03sV0eo0	8.87	9.55	9.38	9.12	8.73	8.54	8.95	8.11	9.55	10.06	8.8	8.68	9.11	8.77	8.62	9.16	8.58	7.77	8.78	8.72	8.94	8.14	8.3	8.41	8.55	9.15	8.17	9.61	8.67	8.82	8.05	8.91	7.96	8.62	12.39	8.78	8.04	8.6	9.05	9.14	8.96	8.64	9.08	8.18	9.48	8.11	8.71	8.62	8.42
0ffqTV6NUrwgfeRyIw	7.17	7.25	7.17	7.19	7.17	7.13	7.14	7.23	7.18	7.16	7.18	7.2	7.23	7.18	7.2	7.18	7.36	7.22	7.16	7.17	7.19	7.2	7.16	7.16	7.17	7.23	7.11	7.23	7.23	7.23	7.22	7.25	7.31	7.19	7.13	7.19	7.13	7.24	7.24	7.14	7.19	7.14	7.21	7.16	7.16	7.1	7.17	7.19	7.22
0fgeR3.V_R0iulYiJU	7.22	7.28	7.27	7.35	7.27	7.28	7.28	7.27	7.27	7.28	7.31	7.33	7.27	7.32	7.27	7.27	7.3	7.28	7.32	7.23	7.27	7.5	7.4	7.41	7.53	7.25	7.35	7.28	7.36	7.2	7.27	7.27	7.26	7.29	7.25	7.35	7.33	7.3	7.31	7.23	7.27	7.2	7.37	7.32	7.4	7.33	7.42	7.21	7.42
0FHlSFDfXA8kil5JFc	7.27	7.27	7.34	7.27	7.29	7.37	7.23	7.28	7.25	7.25	7.23	7.24	7.27	7.38	7.4	7.31	7.26	7.24	7.27	7.25	7.22	7.2	7.36	7.41	7.22	7.26	7.33	7.37	7.28	7.36	7.45	7.32	7.27	7.38	7.26	7.33	7.28	7.34	7.29	7.35	7.3	7.31	7.27	7.35	7.34	7.33	7.24	7.34	7.3
0fIaRCOHRHoiKUzk7Q	7.25	7.23	7.19	7.15	7.25	7.26	7.27	7.27	7.27	7.24	7.25	7.22	7.27	7.23	7.33	7.2	7.26	7.21	7.15	7.17	7.21	7.17	7.2	7.16	7.17	7.3	7.33	7.27	7.16	7.25	7.32	7.32	7.34	7.23	7.24	7.14	7.24	7.38	7.31	7.32	7.33	7.27	7.27	7.29	7.22	7.14	7.13	7.3	7.4
0fjB5EFeyUklK0qNKE	7.29	7.25	7.25	7.19	7.25	7.31	7.27	7.27	7.23	7.24	7.32	7.14	7.32	7.22	7.33	7.23	7.28	7.27	7.21	7.22	7.22	7.19	7.26	7.18	7.28	7.31	7.22	7.29	7.19	7.28	7.35	7.26	7.28	7.22	7.31	7.19	7.24	7.25	7.3	7.3	7.31	7.24	7.21	7.2	7.19	7.22	7.16	7.29	7.21
0FjuyXMkRcp3OsyXL0	7.16	7.14	7.18	7.19	7.12	7.14	7.16	7.19	7.15	7.17	7.11	7.14	7.12	7.23	7.21	7.13	7.12	7.23	7.22	7.17	7.18	7.19	7.25	7.27	7.19	7.18	7.23	7.1	7.2	7.21	7.12	7.13	7.16	7.19	7.13	7.2	7.11	7.12	7.22	7.16	7.11	7.12	7.2	7.2	7.26	7.21	7.21	7.17	7.11
0FKlIhqFKCgeKFCC5A	9.08	8.6	8.98	9.01	8.09	8.56	9.21	8.75	8.22	8.47	9.03	8.38	8.84	8.67	8.39	8.57	8.44	9.71	7.9	8.4	8.41	8.96	8.21	8.59	8.82	8.41	8.86	8.71	8.65	8.33	8.38	9.22	9.36	9.17	8.63	8.3	8.73	8.36	8.6	8.92	8.84	8.76	8.67	8.36	8.5	8.52	8.74	8.82	8.66
0FKoSeniNCri5j66rs	7.3	7.35	7.32	7.4	7.32	7.33	7.4	7.35	7.37	7.26	7.33	7.3	7.38	7.28	7.32	7.26	7.36	7.26	7.35	7.3	7.27	7.22	7.23	7.18	7.3	7.41	7.28	7.36	7.28	7.36	7.34	7.3	7.36	7.34	7.24	7.35	7.34	7.24	7.33	7.35	7.35	7.27	7.35	7.31	7.26	7.35	7.47	7.32	7.29
0fkpS1KSt.RHvtUTBI	7.23	7.16	7.26	7.16	7.19	7.2	7.24	7.19	7.19	7.28	7.2	7.2	7.2	7.21	7.17	7.25	7.2	7.16	7.2	7.19	7.22	7.19	7.19	7.18	7.18	7.18	7.16	7.16	7.23	7.15	7.15	7.14	7.23	7.17	7.26	7.2	7.17	7.15	7.15	7.12	7.16	7.19	7.31	7.19	7.17	7.23	7.19	7.16	7.18
0FleMoCkglMndFAXUk	7.39	7.39	7.37	7.41	7.46	7.45	7.44	7.47	7.33	7.31	7.39	7.4	7.45	7.38	7.53	7.3	7.45	7.31	7.28	7.25	7.28	7.29	7.37	7.24	7.26	7.4	7.39	7.63	7.36	7.46	7.45	7.49	7.42	7.4	7.42	7.37	7.35	7.41	7.43	7.53	7.49	7.38	7.33	7.3	7.37	7.31	7.34	7.35	7.39
0fljnVJ4MCV5fcQdLs	9.23	9.99	9.54	11.98	9.42	11.06	10.41	10.41	8.53	9.69	10.59	9.99	9.82	9.81	10.92	8.99	9.82	10.88	7.7	8.44	7.67	8.66	7.19	8.41	8.8	8.22	10.76	8.37	7.64	8.28	8.6	8.55	7.9	9.2	9.4	7.99	9.87	8.54	8.84	8.52	8.45	9.44	10.34	10.27	9.43	8.12	8.06	8.63	8.36
0flyIEROp.olYSF6n4	9.48	9.04	9.89	9.48	9.3	9.41	9.14	9.82	9.14	8.82	8.59	8.77	9.14	9.63	9.01	9.29	8.75	9.72	8.73	8.9	9.1	9.38	8.7	9.11	9.17	9.12	9.17	9.28	9.75	8.94	8.9	9.1	9.19	9.13	8.69	9.41	9.15	9.47	9.55	9.6	9.12	8.82	8.98	9.15	9.35	8.68	9.43	9.15	8.89
0FNf0V3AfKQgNRPVOc	7.26	7.26	7.19	7.15	7.26	7.27	7.25	7.24	7.24	7.22	7.27	7.27	7.26	7.21	7.29	7.22	7.28	7.36	7.43	7.51	7.31	7.53	7.4	7.62	7.41	7.27	7.22	7.23	7.27	7.23	7.22	7.25	7.26	7.29	7.25	7.37	7.3	7.28	7.26	7.36	7.34	7.17	7.24	7.2	7.18	7.42	7.45	7.33	7.23
0fNIGi6OtF9dHz5w3U	7.27	7.17	7.17	7.22	7.23	7.2	7.23	7.18	7.16	7.31	7.15	7.28	7.24	7.42	7.15	7.18	7.18	7.15	7.16	7.17	7.16	7.16	7.16	7.18	7.18	7.16	7.21	7.11	7.13	7.11	7.11	7.22	7.15	7.1	7.27	7.13	7.23	7.15	7.12	7.14	7.13	7.19	7.38	7.23	7.19	7.13	7.15	7.12	7.04
0FnrNA6k23TquCnuFo	7.33	7.26	7.45	7.29	7.38	7.3	7.43	7.32	7.38	7.23	7.28	7.26	7.34	7.44	7.37	7.37	7.28	7.19	7.27	7.48	7.23	7.2	7.8	7.24	7.26	7.31	7.28	7.38	7.22	7.47	7.44	7.55	7.37	7.33	7.44	7.56	7.28	7.51	7.49	7.39	7.34	7.35	7.26	7.37	7.33	7.66	7.3	7.3	7.41
0FO9_eAGfJeL9MprBU	8.07	7.8	7.38	7.87	7.19	7.18	7.27	7.21	7.67	8.45	7.23	7.67	7.65	7.48	7.4	7.78	7.32	7.08	7.16	7.17	7.21	7.13	7.16	7.16	7.13	7.79	7.1	7.3	7.17	7.5	7.25	7.15	7.12	7.45	7.52	7.31	7.18	7.12	7.14	7.19	7.47	7.49	7.8	7.27	7.27	7.17	7.43	7.24	7.4
0foEUlNK9JIgOlwUS4	7.97	7.93	7.88	8.09	8.08	7.95	7.71	7.68	8.06	8.5	7.86	7.91	7.86	7.94	8.25	8.02	8.01	8.1	7.92	7.5	7.78	7.44	7.74	7.82	7.68	7.59	7.87	7.81	8.13	7.5	7.75	7.98	7.93	7.58	8.11	7.56	7.84	8.37	7.75	7.85	8.17	7.93	7.73	8.03	7.98	7.71	7.73	7.68	7.85
0FOrFbTw.e4V6svHFI	7.23	7.2	7.15	7.22	7.22	7.17	7.2	7.18	7.17	7.2	7.17	7.15	7.23	7.34	7.29	7.15	7.19	7.14	7.19	7.19	7.18	7.17	7.13	7.18	7.17	7.22	7.21	7.19	7.17	7.21	7.18	7.22	7.23	7.22	7.13	7.15	7.22	7.14	7.23	7.22	7.18	7.13	7.21	7.22	7.32	7.18	7.14	7.23	7.29
0froiyDkoo4D6FeQxI	7.24	7.2	7.19	7.22	7.22	7.24	7.24	7.26	7.22	7.2	7.21	7.14	7.2	7.28	7.23	7.23	7.17	7.22	7.39	7.26	7.2	7.23	7.21	7.18	7.23	7.23	7.18	7.21	7.21	7.21	7.16	7.23	7.17	7.25	7.18	7.2	7.24	7.3	7.15	7.22	7.24	7.25	7.26	7.17	7.26	7.19	7.2	7.21	7.3
0ft07bSUkUJfvqRzSo	13	12.92	13.25	13.03	12.73	12.57	12.81	13.27	12.84	12.75	13.24	12.78	13.22	13.11	12.88	12.94	13.2	13.19	13.22	13.32	13	13.32	13.71	13.4	13.05	13.27	12.9	13.57	12.96	13.36	13.58	13.38	13.03	12.68	12.92	13.04	12.69	13.45	12.73	13.31	12.76	13	13.05	12.95	12.64	13.31	13.48	13.11	13.31
0ftRqd1_TSVd1J2A1c	7.3	7.66	7.35	7.25	7.3	7.4	7.16	7.59	7.22	7.34	7.38	7.31	7.63	7.26	7.32	7.28	7.45	9.17	7.31	7.18	7.26	7.4	7.22	7.5	7.24	7.19	7.28	7.2	7.36	7.19	7.2	7.17	7.24	7.19	7.2	7.31	7.24	7.18	7.31	7.17	7.31	7.26	7.23	7.3	7.18	7.28	7.32	7.35	7.27
0fU.u0Nf6jSXEkEt10	7.1	7.11	7.15	7.21	7.13	7.13	7.19	7.13	7.17	7.19	7.12	7.17	7.12	7.13	7.05	7.12	7.12	7.13	7.18	7.19	7.19	7.2	7.2	7.19	7.24	7.15	7.13	7.13	7.22	7.14	7.14	7.2	7.13	7.14	7.16	7.22	7.11	7.14	7.17	7.12	7.16	7.12	7.11	7.15	7.15	7.18	7.21	7.11	7.14
0fUCXOeDU.Xfy83S6U	7.28	7.24	7.3	7.25	7.27	7.27	7.23	7.27	7.21	7.19	7.23	7.22	7.25	7.26	7.25	7.32	7.35	7.3	7.22	7.21	7.22	7.2	7.18	7.19	7.2	7.23	7.41	7.26	7.22	7.22	7.28	7.21	7.22	7.28	7.32	7.21	7.28	7.41	7.34	7.22	7.23	7.28	7.24	7.29	7.25	7.29	7.22	7.25	7.29
0Fuf_f6JeKgO6Cmei0	7.13	7.08	7.09	7.1	7.18	7.17	7.07	7.17	7.08	7.06	7.09	7.14	7.19	7.06	7.19	7.13	7.08	7.16	7.11	7.17	7.18	7.1	7.08	7.06	7.15	7.19	7.05	7.11	7.14	7.11	7.13	7.1	7.08	7.17	7.19	7.07	7.13	7.17	7.15	7.1	7.2	7.14	7.1	7.12	7.12	7.13	7.14	7.15	7.11
0FuiJmheSp55.nqXpI	7.37	7.22	7.2	7.39	7.4	7.29	7.22	7.22	7.23	7.19	7.19	7.25	7.29	7.2	7.21	7.37	7.23	7.34	7.19	7.19	7.2	7.18	7.2	7.22	7.21	7.15	7.17	7.22	7.26	7.19	7.28	7.22	7.24	7.23	7.2	7.28	7.3	7.24	7.27	7.22	7.18	7.24	7.28	7.24	7.11	7.25	7.24	7.18	7.15
0fUt.8gbrooq_7uVSo	8.35	8.35	8.13	8.15	8.28	7.99	8.27	8.33	8.02	8.13	8.54	8.14	7.96	8.29	8.28	8.43	8.18	7.6	8.28	8.21	8.75	9.11	9.53	8.7	9.17	8.52	8.26	8.3	8.76	8.92	8.45	8.17	8.28	8.65	8.26	8.32	8.59	8.99	8.4	8.85	8.7	8.27	7.83	7.98	8	8.8	8.13	8.58	8.55
0fWJcppIo8UpVYiRKg	7.17	7.18	7.16	7.11	7.16	7.12	7.14	7.15	7.13	7.15	7.09	7.25	7.14	7.21	7.13	7.2	7.15	7.19	7.21	7.18	7.22	7.2	7.16	7.18	7.2	7.16	7.16	7.16	7.15	7.15	7.17	7.19	7.23	7.21	7.19	7.14	7.09	7.11	7.2	7.11	7.26	7.12	7.22	7.17	7.14	7.17	7.17	7.18	7.15
0fWXVq.CY916snqPEo	7.23	7.23	7.21	7.32	7.22	7.24	7.26	7.25	7.17	7.24	7.24	7.26	7.22	7.2	7.21	7.19	7.26	7.21	7.19	7.19	7.25	7.22	7.21	7.2	7.21	7.16	7.24	7.2	7.2	7.18	7.16	7.24	7.18	7.28	7.21	7.23	7.18	7.2	7.17	7.28	7.22	7.21	7.29	7.21	7.28	7.25	7.22	7.2	7.21
0fXoLt.aNRzOXSROgU	9.47	8.47	8.92	8.14	8.58	9.46	8.52	8.88	8.41	9.62	8.54	8.78	8.61	9.13	8.57	8.92	8.21	7.87	8.64	9.08	8.07	8.34	8.68	8.6	8.53	9.28	8.81	8.78	8.91	8.88	9.04	8.99	8.86	8.55	8.97	8.58	8.77	8.73	8.84	8.55	8.27	9.28	9.51	9.32	8.69	8.71	8.72	8.42	8.92
0fXrQnzrnz.jepR9XU	10.64	10.85	10.36	10.66	10.13	10.44	10.35	11.04	10.79	10.79	10.7	10.54	10.41	10.11	10.32	10.66	10.5	11.05	10.87	10.74	11.46	11.22	10.87	11.04	11.14	10.85	10.95	10.91	11.08	11.41	10.69	10.57	10.4	10.55	10.46	10.46	10.7	11.51	10.45	10.77	11.18	10.8	10.66	10.69	11.09	10.72	10.52	11.01	10.44
0Fyq9MgAoL_SOQwO4o	7.28	7.29	7.31	7.23	7.34	7.3	7.38	7.3	7.32	7.25	7.38	7.27	7.33	7.18	7.35	7.28	7.29	7.34	7.23	7.26	7.22	7.19	7.19	7.16	7.22	7.27	7.28	7.25	7.25	7.27	7.26	7.33	7.23	7.29	7.41	7.23	7.23	7.23	7.22	7.16	7.25	7.32	7.14	7.32	7.23	7.24	7.22	7.23	7.21
0G.tRK5XnU0vZ1JDMo	7.41	7.56	7.42	7.32	7.54	7.45	7.41	7.41	7.45	7.54	7.45	7.41	7.31	7.48	7.35	7.52	7.42	7.33	7.88	7.9	7.76	7.95	7.75	8.1	7.58	7.66	7.27	7.52	7.75	7.43	7.53	7.73	7.49	7.52	7.53	7.48	7.38	7.45	7.5	7.52	7.71	7.63	7.66	7.52	7.61	7.54	7.89	7.48	7.5
0G16nnuKKCQvrnKKp0	7.34	7.36	7.32	7.31	7.32	7.4	7.36	7.39	7.31	7.39	7.3	7.3	7.35	7.35	7.27	7.34	7.38	7.39	7.42	7.33	7.29	7.43	7.3	7.58	7.3	7.3	7.29	7.27	7.33	7.35	7.28	7.38	7.36	7.38	7.38	7.34	7.31	7.25	7.34	7.39	7.27	7.29	7.33	7.34	7.42	7.35	7.3	7.3	7.25
0g4XOE0iPWF9ePoKFo	7.15	7.19	7.21	7.27	7.22	7.22	7.14	7.18	7.24	7.22	7.17	7.22	7.21	7.21	7.21	7.2	7.22	7.18	7.28	7.48	7.22	7.46	7.29	7.33	7.48	7.22	7.3	7.2	7.25	7.23	7.32	7.23	7.29	7.21	7.23	7.35	7.17	7.28	7.28	7.26	7.22	7.27	7.19	7.21	7.22	7.3	7.36	7.22	7.25
0G58eRCipKgiUoKigU	7.26	7.25	7.32	7.28	7.27	7.31	7.29	7.36	7.26	7.33	7.23	7.28	7.37	7.38	7.35	7.3	7.36	7.3	7.41	7.23	7.25	7.27	7.24	7.46	7.24	7.27	7.32	7.33	7.29	7.3	7.33	7.22	7.25	7.28	7.25	7.39	7.35	7.29	7.31	7.27	7.29	7.27	7.34	7.25	7.16	7.26	7.25	7.27	7.35
0g5fdUu53VQTXKRJ.Q	9.4	8.73	8.24	8.77	8.96	8.34	10.06	9.9	8.78	8.45	9.35	9.59	9.87	8.73	8.87	9.81	9.47	7.9	8.86	9.14	9.7	11.43	11.1	10.46	11.4	10.04	10.27	9.98	10.6	10.95	10.11	8.81	10.4	9.64	9.54	10.31	10.87	10.11	10.29	10.72	9.11	9.58	8.6	9.85	7.85	10.3	9.43	10	10.13
0g6s8IsLRSsRAHlNMk	7.37	7.57	7.95	7.63	8.02	7.46	7.4	7.44	7.79	8.31	7.47	7.72	7.47	7.8	7.68	7.94	8.02	7.49	7.17	7.2	7.21	7.2	7.2	7.18	7.2	7.24	7.59	7.24	7.21	7.24	7.39	7.2	7.28	7.31	7.76	7.19	7.71	7.36	7.27	7.23	7.28	8.05	8.61	7.81	8.53	7.17	7.22	7.22	7.39
0g7h0IdiljGKe495f4	10.91	10.92	10.86	11.03	11.05	11.44	10.77	10.6	10.93	11.52	10.54	9.91	11.15	11.14	12	11.17	11.06	10.7	11.12	10.81	11.55	12.33	9.41	10.31	10.37	10.18	10.23	9.71	11.04	10.38	9.9	10.54	10.11	10.65	10.87	11.11	10.29	10.42	10.75	10.69	11.03	10	10.22	11.39	11.42	10.66	11.82	10.48	11.35
0g9UihKfQN0dN_utUE	7.2	7.12	7.06	7.12	7.11	7.19	7.1	7.14	7.05	7.1	7.06	7.13	7.08	7.14	7.07	7.14	7.08	7.13	7.14	7.2	7.19	7.17	7.17	7.14	7.15	7.17	7.17	7.06	7.12	7.1	7.12	7.14	7.13	7.15	7.18	7.13	7.11	7.13	7.12	7.02	7.1	7.15	7.17	7.15	7.16	7.13	7.13	7.16	7.21
0gCSAE_3VqVSRUT1B0	7.25	7.33	7.27	7.38	7.22	7.28	7.28	7.3	7.24	7.27	7.25	7.19	7.27	7.4	7.3	7.31	7.29	7.11	7.33	7.32	7.21	7.21	7.23	7.2	7.19	7.28	7.24	7.28	7.2	7.21	7.28	7.27	7.28	7.31	7.25	7.28	7.3	7.28	7.2	7.22	7.28	7.23	7.34	7.28	7.25	7.3	7.17	7.32	7.3
0gd7S4Aq0x4ilKvXuk	7.08	7.14	7.11	7.12	7.16	7.13	7.12	7.18	7.07	7.1	7.1	7.11	7.02	7.07	7.11	7.12	7.06	7.07	7.1	7.16	7.18	7.09	7.12	7.1	7.08	7.19	7.09	7.13	7.11	7.13	7.1	7.06	7.11	7.08	7.18	7.11	7.07	7.11	7.05	7.08	7.15	7.09	7.04	7.08	7.2	7.09	7.12	7.07	7.12
0gEJOlCI7iUv9Ul788	7.25	7.17	7.36	7.19	7.13	7.26	7.43	7.21	7.31	7.17	7.21	7.24	7.33	7.2	7.23	7.28	7.16	7.27	7.22	7.18	7.34	7.69	7.19	7.17	7.21	7.23	7.15	7.14	7.35	7.26	7.24	7.23	7.3	7.09	7.65	7.56	7.24	7.2	7.22	7.15	7.2	7.17	7.5	7.18	7.28	7.45	7.51	7.08	7.18
0gfo0_viqnIqIOoFFU	7.24	7.21	7.31	7.25	7.34	7.28	7.26	7.2	7.42	7.19	7.31	7.19	7.18	7.22	7.22	7.32	7.25	7.27	7.2	7.19	7.26	7.2	7.2	7.17	7.21	7.34	7.23	7.23	7.06	7.27	7.27	7.2	7.35	7.23	7.27	7.14	7.28	7.22	7.27	7.25	7.25	7.19	7.26	7.28	7.2	7.25	7.24	7.27	7.25
0ggdLF96fNjqws8pXo	7.18	7.16	7.18	7.18	7.24	7.18	7.22	7.16	7.18	7.15	7.16	7.17	7.19	7.22	7.18	7.17	7.16	7.13	7.21	7.19	7.19	7.22	7.19	7.14	7.17	7.19	7.28	7.24	7.18	7.2	7.23	7.21	7.19	7.19	7.15	7.18	7.2	7.27	7.23	7.22	7.25	7.19	7.18	7.14	7.21	7.17	7.18	7.2	7.25
0GGUkLxaCuKrgHwXrI	7.33	7.37	7.36	7.33	7.33	7.32	7.41	7.32	7.32	7.38	7.34	7.27	7.28	7.3	7.32	7.31	7.32	7.23	7.37	7.29	7.42	7.34	7.21	7.28	7.46	7.35	7.32	7.37	7.29	7.36	7.3	7.32	7.37	7.35	7.32	7.37	7.27	7.39	7.37	7.34	7.39	7.32	7.21	7.26	7.36	7.23	7.28	7.37	7.38
0ghJP1_d4NUqVRIong	7.36	7.36	7.31	7.34	7.37	7.31	7.38	7.31	7.41	7.32	7.39	7.25	7.4	7.19	7.37	7.31	7.29	7.31	7.62	7.39	7.42	7.51	7.38	7.62	7.5	7.41	7.36	7.41	7.36	7.43	7.36	7.41	7.32	7.36	7.43	7.47	7.34	7.43	7.44	7.42	7.46	7.33	7.23	7.33	7.25	7.29	7.29	7.4	7.32
0gI6ol2ty6OYERXx54	7.36	7.26	7.27	7.27	7.28	7.35	7.33	7.26	7.37	7.2	7.23	7.19	7.33	7.16	7.29	7.2	7.27	7.24	7.18	7.21	7.28	7.19	7.21	7.25	7.22	7.28	7.21	7.35	7.24	7.28	7.32	7.31	7.31	7.29	7.26	7.23	7.24	7.26	7.25	7.33	7.29	7.31	7.17	7.2	7.21	7.21	7.19	7.27	7.24
0gJ3nmTKP6j4yv19dU	7.21	7.14	7.15	7.16	7.1	7.12	7.13	7.12	7.12	7.13	7.08	7.17	7.07	7.17	7.17	7.14	7.12	7.17	7.17	7.17	7.17	7.18	7.14	7.15	7.2	7.13	7.07	7.1	7.19	7.25	7.15	7.16	7.13	7.15	7.08	7.16	7.21	7.06	7.14	7.11	7.06	7.04	7.18	7.13	7.04	7.22	7.16	7.09	7.12
0gJfrCwqP0OOxyu6Jc	7.18	7.13	7.14	7.16	7.18	7.17	7.14	7.15	7.2	7.12	7.13	7.11	7.21	7.19	7.14	7.14	7.11	7.14	7.18	7.18	7.18	7.2	7.15	7.17	7.17	7.13	7.18	7.19	7.13	7.19	7.18	7.18	7.15	7.09	7.14	7.12	7.05	7.18	7.09	7.17	7.14	7.09	7.1	7.09	7.17	7.18	7.16	7.18	7.12
0gjilRTwI0evgEVqXo	7.68	7.64	7.7	7.48	7.67	7.55	7.62	7.5	7.83	7.93	7.81	7.49	7.77	7.67	7.56	7.54	7.47	7.62	7.56	7.85	7.66	8.11	7.86	8.24	7.82	7.72	7.43	7.73	7.66	7.73	7.51	7.8	7.7	7.59	7.52	7.48	7.41	7.67	7.46	7.65	7.57	7.43	7.85	7.62	7.83	7.72	7.66	7.63	7.7
0gkgrQIVERX8eplOuo	7.78	7.76	7.87	7.85	7.76	7.85	7.63	7.71	7.82	7.76	7.68	7.69	7.71	7.72	7.64	7.66	7.78	7.79	7.84	7.84	7.59	7.79	7.83	7.71	7.78	7.79	7.7	7.76	7.88	7.79	7.98	7.89	8.06	7.76	7.74	7.81	7.81	7.81	7.85	7.76	7.88	7.7	7.7	7.79	7.69	7.81	7.78	7.84	7.53
0gl0kDgJBKsPniIi8M	7.32	7.34	7.34	7.26	7.29	7.37	7.35	7.31	7.34	7.31	7.29	7.21	7.3	7.23	7.3	7.23	7.33	7.25	7.25	7.19	7.4	7.2	7.2	7.35	7.49	7.35	7.24	7.36	7.3	7.46	7.35	7.39	7.35	7.36	7.35	7.37	7.32	7.3	7.38	7.26	7.35	7.32	7.17	7.33	7.23	7.29	7.22	7.33	7.25
0Gl7VCUuKJwIRUrVQM	7.48	7.41	7.53	7.56	7.34	7.19	7.24	7.39	7.44	7.36	7.36	7.89	7.32	7.31	7.25	7.6	8.12	7.54	7.28	7.18	7.41	7.4	7.26	7.24	7.3	7.33	7.38	7.43	7.29	7.21	7.29	7.31	7.46	7.71	7.34	7.2	7.46	7.18	7.35	7.5	7.37	7.25	7.32	7.28	7.59	7.22	7.84	7.32	7.32
0gl_zjlNeoxJ4sJeT0	7.2	7.13	7.18	7.18	7.12	7.21	7.16	7.17	7.1	7.13	7.17	7.16	7.11	7.21	7.15	7.1	7.09	7.18	7.18	7.21	7.22	7.18	7.25	7.19	7.18	7.14	7.1	7.14	7.17	7.15	7.13	7.12	7.11	7.25	7.13	7.22	7.14	7.17	7.1	7.16	7.16	7.14	7.17	7.14	7.14	7.18	7.17	7.1	7.16
0glDnwdCtOCEH3k.10	7.17	7.3	7.19	7.18	7.27	7.23	7.23	7.28	7.22	7.19	7.22	7.19	7.13	7.28	7.31	7.17	7.22	7.18	7.22	7.21	7.24	7.36	7.24	7.19	7.28	7.28	7.23	7.26	7.29	7.25	7.21	7.22	7.26	7.24	7.22	7.19	7.21	7.34	7.29	7.3	7.21	7.24	7.26	7.27	7.18	7.21	7.23	7.23	7.31
0gLi6r6kyni4rpeDhE	7.76	7.7	8.18	7.79	8.39	7.76	8.02	7.93	8.18	8.9	7.77	7.76	7.57	7.92	8.03	8.13	8	7.47	7.94	9.47	7.88	8.18	8.07	8.28	8.18	8.34	7.6	7.85	8	7.85	8.08	9.31	7.82	8.14	8.77	7.85	7.84	8.24	8.34	7.93	7.85	8.15	7.73	7.77	7.6	8.59	7.86	8.11	7.97
0glJ9W1GHvtfHlQoKo	8.52	8.44	8.67	8.64	8.75	8.97	8.74	8.75	8.96	8.39	8.6	8.53	8.88	8.4	8.44	8.45	8.57	8.6	9.01	9.02	8.7	8.62	8.81	8.8	8.67	8.63	8.77	8.8	8.82	8.83	8.91	8.6	9.09	8.67	8.82	8.74	8.81	8.64	8.69	8.97	8.6	8.8	8.51	8.55	8.26	8.74	8.92	8.64	8.3
0glrql9oCIiSngigYw	11.28	11.01	11.46	10.47	10.62	11.26	10.46	11	11.18	11.15	11.6	11.62	11.03	10.85	10.55	10.96	10.94	10.3	10.99	11.3	11.1	10.58	11.18	10.64	10.76	11.86	10.78	11.53	10.52	10.98	11.1	11.75	11.17	10.47	11.28	10.59	11.04	11.2	10.76	10.62	11.71	11.16	11.3	10.72	10.8	10.74	10.26	12	11.22
0gno9Xeh6q5d6YQR14	7.48	7.46	7.48	7.43	7.5	7.48	7.49	7.51	7.51	7.49	7.53	7.47	7.55	7.48	7.51	7.39	7.41	7.49	7.64	7.84	7.59	7.77	7.63	8.16	7.67	7.51	7.49	7.56	7.58	7.56	7.53	7.48	7.52	7.62	7.52	7.53	7.5	7.46	7.52	7.44	7.51	7.52	7.45	7.44	7.57	7.55	7.61	7.59	7.52
0gOQbyB9IdWkXK3Unk	7.33	7.13	7.41	7.11	7.21	7.22	7.26	7.2	7.2	7.15	7.13	7.2	7.17	7.17	7.23	7.23	7.15	7.2	7.17	7.19	7.2	7.14	7.16	7.17	7.17	7.19	7.23	7.15	7.27	7.22	7.19	7.22	7.31	7.26	7.2	7.15	7.24	7.17	7.24	7.23	7.2	7.13	7.26	7.22	7.13	7.16	7.19	7.18	7.24
0gouIpcII_4qz8qgzo	7.22	7.29	7.27	7.24	7.19	7.27	7.23	7.2	7.23	7.24	7.27	7.26	7.23	7.23	7.27	7.22	7.27	7.18	7.2	7.19	7.21	7.2	7.19	7.18	7.26	7.19	7.16	7.18	7.24	7.26	7.28	7.26	7.24	7.22	7.17	7.31	7.21	7.23	7.22	7.16	7.21	7.23	7.29	7.24	7.25	7.28	7.19	7.25	7.21
0gpQPfSSCJ4ogjwi74	9.68	10.6	10.18	10.72	10.65	9.98	9.8	9.12	10.37	10.79	11.01	11.12	10.36	11.33	9.97	10.69	10.74	8.97	7.88	7.64	7.52	7.48	7.49	7.72	7.86	8.03	9.74	7.8	7.76	7.69	7.58	8.37	8.12	7.79	9.75	7.66	10.52	8.03	7.65	7.75	7.53	9.98	11.6	10.34	11.85	7.54	7.78	7.61	8.88
0gqB4SRNSoiUsqkSCE	7.37	7.4	7.36	7.41	7.41	7.32	7.46	7.41	7.46	7.41	7.41	7.4	7.48	7.45	7.41	7.42	7.45	7.34	7.33	7.27	7.31	7.26	7.62	7.29	7.35	7.44	7.45	7.43	7.41	7.51	7.45	7.43	7.46	7.44	7.41	7.56	7.55	7.5	7.58	7.53	7.52	7.36	7.33	7.43	7.27	7.49	7.47	7.48	7.35
0gQJI4xSL8d3Oro5ek	7.32	7.32	7.29	7.29	7.24	7.3	7.27	7.3	7.26	7.25	7.21	7.38	7.23	7.27	7.33	7.28	7.25	7.25	7.3	7.24	7.21	7.25	7.2	7.27	7.21	7.31	7.27	7.27	7.22	7.29	7.3	7.27	7.27	7.33	7.32	7.19	7.27	7.36	7.3	7.31	7.41	7.21	7.32	7.32	7.31	7.23	7.23	7.43	7.37
0grZF5T6AUiISfe5FQ	7.16	7.18	7.25	7.26	7.15	7.18	7.22	7.17	7.11	7.2	7.17	7.15	7.16	7.21	7.27	7.2	7.18	7.21	7.28	7.19	7.28	7.25	7.26	7.15	7.19	7.2	7.18	7.26	7.21	7.27	7.19	7.15	7.28	7.18	7.21	7.23	7.22	7.22	7.17	7.18	7.19	7.18	7.21	7.12	7.2	7.22	7.25	7.12	7.25
0GsfrCKiWv6iIU_TZ4	12.11	11.3	11.06	12.01	11.84	11.95	11.32	11.13	11.59	10.14	11.44	13	11.31	11.11	11.18	11.9	11.88	9.92	12.2	12.13	12	12.08	14.74	12.22	12.03	11.34	12.26	12.25	12.48	11.96	12.65	11.64	13.04	12.59	11.92	12.33	11.97	11.91	12.87	11.19	12.03	11.63	11.15	12.55	10.88	13.43	11.5	11.85	12.25
0gUlXBEjiqP6h4wne4	7.67	8.04	8.4	7.74	7.49	7.52	7.33	7.62	7.77	8.71	7.64	7.47	7.35	8.25	7.6	7.74	7.65	7.54	7.42	7.37	7.65	7.2	7.25	7.34	7.32	7.87	7.49	7.61	7.39	7.41	7.44	8.01	7.61	7.51	7.66	7.26	7.44	7.53	7.4	7.37	7.53	7.81	7.83	7.44	8.2	7.37	7.44	7.48	7.77
0guoDeVPqowohRSOAo	7.32	7.39	7.34	7.33	7.27	7.33	7.38	7.32	7.39	7.31	7.29	7.33	7.22	7.4	7.43	7.36	7.38	7.29	7.38	7.35	7.47	7.57	7.64	7.46	7.37	7.41	7.31	7.41	7.43	7.39	7.43	7.43	7.39	7.51	7.3	7.31	7.25	7.39	7.27	7.5	7.39	7.4	7.23	7.33	7.28	7.29	7.42	7.37	7.32
0gvEMpM6kA67JKdHpY	10.1	10.73	10.09	10.03	10.32	9.99	10.47	10.15	10.62	10.92	10.42	9.74	11.28	10.11	11.58	11.55	10.33	9.48	9.37	9.41	9.95	11.04	10.07	9.42	9.78	9.31	10.28	10.22	9.83	9.82	9.74	10.09	9.88	9.37	10.98	10.05	10.96	10.71	9.46	9.94	9.57	10.55	11.1	10.7	9.87	10.59	9.26	9.68	10.31
0GXe6ripTfiUiXIuT0	7.45	7.68	7.45	7.44	7.43	7.49	7.65	7.47	7.44	7.52	7.48	7.73	7.48	7.35	7.71	7.4	7.41	7.46	7.66	7.55	7.32	7.33	7.63	7.53	7.74	7.49	7.42	7.5	7.32	7.54	7.49	7.38	7.45	7.51	7.48	7.42	7.62	7.36	7.38	7.43	7.45	7.45	7.34	7.36	7.56	7.4	7.41	7.45	7.48
0gZMaTvDh3jrtdd6kk	11.93	11.87	11.38	12.06	11.02	11.72	11.24	11.27	13.53	11.18	11.58	11.01	11.19	10.73	11.93	11.69	11.87	11.68	11.62	11.71	12.17	11.21	11.49	11.32	10.92	10.87	11.11	12.07	11.15	12.19	11.65	11.36	11.08	12.63	11.61	11.71	10.68	11.79	12.1	11.78	12.1	11.21	10.78	11.32	10.95	11.29	12.45	11.46	11.56
0gzs4xfADSRPwQLMHw	7.14	7.15	7.15	7.21	7.17	7.17	7.2	7.16	7.2	7.16	7.11	7.21	7.12	7.19	7.16	7.18	7.11	7.14	7.17	7.17	7.2	7.15	7.16	7.17	7.18	7.09	7.17	7.15	7.13	7.15	7.17	7.16	7.12	7.14	7.15	7.11	7.2	7.18	7.12	7.18	7.12	7.13	7.15	7.14	7.23	7.15	7.14	7.15	7.22
0H.8A7z.fc.xADvEOA	7.32	7.38	7.38	7.33	7.34	7.31	7.37	7.37	7.38	7.24	7.33	7.23	7.4	7.21	7.39	7.29	7.35	7.34	7.33	7.36	7.33	7.22	7.28	7.62	7.46	7.45	7.34	7.44	7.42	7.48	7.58	7.43	7.36	7.38	7.38	7.23	7.45	7.22	7.4	7.41	7.55	7.3	7.22	7.26	7.27	7.16	7.17	7.5	7.3
0h1AqVQUV7UrDlAC14	7.23	7.7	7.28	7.26	7.55	7.31	7.49	7.64	7.55	7.25	7.35	7.46	7.26	7.26	7.37	7.39	7.26	7.25	8.68	9.25	7.54	7.56	7.58	7.6	7.65	7.39	7.32	8.09	7.59	7.31	7.35	7.21	7.26	7.39	7.24	8.25	7.22	7.23	7.32	7.38	8.07	7.23	7.29	7.28	7.49	8.07	7.6	7.29	7.26
0h1BcHeoB4gOn3u50o	7.19	7.2	7.18	7.25	7.16	7.24	7.19	7.26	7.16	7.22	7.22	7.25	7.17	7.1	7.23	7.19	7.22	7.25	7.17	7.18	7.24	7.19	7.19	7.19	7.18	7.25	7.16	7.19	7.18	7.21	7.12	7.19	7.24	7.18	7.18	7.2	7.26	7.18	7.21	7.17	7.2	7.22	7.37	7.18	7.21	7.17	7.18	7.16	7.17
0h1OAuTzRgng.uwk_4	7.2	7.18	7.23	7.19	7.29	7.24	7.2	7.16	7.13	7.16	7.21	7.21	7.18	7.24	7.24	7.21	7.2	7.19	7.2	7.18	7.18	7.2	7.15	7.18	7.17	7.24	7.24	7.19	7.2	7.16	7.16	7.17	7.17	7.15	7.22	7.16	7.29	7.27	7.19	7.19	7.19	7.28	7.14	7.28	7.28	7.17	7.17	7.19	7.24
0H3sr1CiEVAn0BUheU	7.27	7.45	7.37	7.33	7.51	7.44	7.32	7.25	7.46	7.52	7.3	7.46	7.29	7.55	7.35	7.27	7.24	7.2	7.24	7.28	7.32	7.19	7.27	7.17	7.21	7.43	7.28	7.26	7.23	7.25	7.14	7.29	7.26	7.26	7.42	7.22	7.46	7.38	7.24	7.24	7.28	7.27	7.42	7.32	7.35	7.3	7.34	7.22	7.31
0H513mJN3rlToEeTBU	8.67	8.93	8.76	8.92	8.9	9.84	11	12.28	9.17	9.02	11.17	9.95	11.09	10.08	10.58	8.49	11.95	10.98	10.74	10.85	10.95	11.68	10.72	10.38	10.73	8.44	10.54	9.8	11.27	8.93	9.62	9.53	9.42	10.75	9.24	10.85	10.24	8.31	10.86	10.55	11.16	10.11	9.55	9.98	7.98	10.16	10.04	12	9.65
0h575QxdIdSoCIopTQ	10.17	9.46	10.52	8.81	10.15	9.35	10.27	9.37	9.64	10.02	9.44	9.63	10.49	10.37	10.51	10.25	9.94	9.61	10.2	9.73	10.82	9.51	10.26	9.12	9.98	11.04	9.97	10.51	9.92	10.12	10.04	10.27	9.83	10.03	10.87	9.74	9.9	10.66	9.92	9.73	10.2	9.67	9.72	9.78	10.62	9.89	9.52	10.2	9.38
0h5KgNJIj9yn1S6J3s	7.17	7.16	7.15	7.14	7.21	7.25	7.2	7.25	7.16	7.19	7.15	7.16	7.17	7.23	7.17	7.22	7.26	7.28	7.2	7.24	7.21	7.19	7.16	7.18	7.2	7.24	7.16	7.17	7.21	7.21	7.15	7.16	7.2	7.21	7.14	7.21	7.17	7.14	7.15	7.19	7.2	7.11	7.17	7.17	7.28	7.2	7.22	7.15	7.22
0H69cX_1ev_usys67U	7.23	7.16	7.14	7.11	7.17	7.16	7.09	7.14	7.12	7.1	7.13	7.2	7.14	7.12	7.15	7.13	7.14	7.15	7.2	7.18	7.2	7.18	7.17	7.16	7.18	7.12	7.09	7.2	7.19	7.19	7.17	7.12	7.15	7.21	7.19	7.14	7.12	7.16	7.16	7.18	7.19	7.15	7.12	7.16	7.11	7.18	7.12	7.19	7.15
0h6OWjUTsX64OeNvkU	7.18	7.16	7.14	7.15	7.21	7.11	7.22	7.22	7.14	7.15	7.13	7.17	7.19	7.15	7.21	7.22	7.12	7.13	7.15	7.2	7.19	7.19	7.17	7.17	7.15	7.24	7.18	7.22	7.16	7.15	7.19	7.25	7.2	7.21	7.14	7.2	7.24	7.19	7.29	7.18	7.19	7.16	7.11	7.21	7.2	7.11	7.14	7.23	7.24
0h8Xo6H6hAr10oX6EU	7.26	7.23	7.24	7.24	7.17	7.28	7.27	7.33	7.41	7.25	7.23	7.22	7.28	7.16	7.27	7.23	7.25	7.22	7.32	7.22	7.41	7.21	7.21	7.29	7.28	7.22	7.27	7.24	7.21	7.22	7.18	7.25	7.34	7.2	7.25	7.23	7.25	7.26	7.22	7.26	7.19	7.25	7.15	7.18	7.43	7.25	7.31	7.22	7.22
0h99N134Ok1UtD4iSk	7.16	7.19	7.19	7.18	7.16	7.17	7.1	7.21	7.23	7.16	7.24	7.18	7.21	7.16	7.17	7.23	7.18	7.22	7.35	7.29	7.22	7.19	7.18	7.18	7.21	7.18	7.15	7.22	7.19	7.2	7.22	7.2	7.14	7.18	7.19	7.18	7.19	7.24	7.21	7.22	7.2	7.18	7.22	7.16	7.18	7.31	7.27	7.25	7.23
0H9EM.DwLx9e3uOkAA	7.05	7.18	7.14	7.14	7.16	7.22	7.18	7.11	7.2	7.17	7.2	7.13	7.11	7.1	7.16	7.11	7.12	7.12	7.2	7.18	7.18	7.17	7.2	7.15	7.16	7.15	7.15	7.11	7.21	7.18	7.15	7.13	7.17	7.06	7.12	7.2	7.15	7.1	7.16	7.15	7.16	7.14	7.22	7.25	7.12	7.16	7.17	7.14	7.13
0H_6l.WHnE71lSFUog	7.17	7.18	7.14	7.19	7.2	7.3	7.23	7.24	7.21	7.14	7.24	7.18	7.11	7.19	7.17	7.17	7.19	7.12	7.17	7.18	7.2	7.23	7.2	7.26	7.31	7.17	7.17	7.16	7.19	7.21	7.23	7.17	7.2	7.18	7.22	7.2	7.15	7.12	7.2	7.14	7.25	7.21	7.19	7.21	7.15	7.17	7.25	7.17	7.2
0H_7FKNHn_RB1KoZ70	7.32	7.31	7.23	7.28	7.26	7.3	7.32	7.33	7.27	7.26	7.2	7.36	7.28	7.31	7.38	7.27	7.32	7.24	7.37	7.43	7.32	7.21	7.22	7.18	7.19	7.34	7.27	7.32	7.24	7.4	7.29	7.25	7.32	7.37	7.45	7.32	7.4	7.4	7.32	7.29	7.36	7.36	7.29	7.33	7.33	7.28	7.23	7.3	7.36
0h_lXqey.nhV03AAyk	8.09	8.32	8.6	9.48	8.98	9.76	9.27	9.18	8.72	9.05	8.29	7.95	8.59	8.34	9.37	8.4	8.15	9.89	9.22	9.36	9.19	7.94	9.26	8.46	8.3	8.73	8.64	8.18	8.8	9.05	8.24	8.9	8	9.8	8.62	9.46	8.19	8.96	8.92	8.64	9.95	8.95	8.2	8.35	8.18	8.69	9.51	8.79	8.09
0hAk1Lwv80FIXCoJ1U	7.28	7.27	7.26	7.32	7.3	7.42	7.32	7.31	7.28	7.33	7.25	7.3	7.31	7.39	7.28	7.31	7.24	7.26	7.24	7.32	7.21	7.35	7.29	7.19	7.37	7.29	7.4	7.26	7.26	7.32	7.27	7.35	7.26	7.45	7.3	7.3	7.28	7.39	7.32	7.33	7.26	7.39	7.45	7.33	7.27	7.28	7.25	7.29	7.43
0hbeUO21VEnIJ0FtF8	7.24	7.2	7.22	7.18	7.24	7.26	7.26	7.21	7.2	7.25	7.2	7.23	7.21	7.3	7.3	7.28	7.2	7.25	7.18	7.19	7.19	7.18	7.19	7.18	7.2	7.22	7.25	7.2	7.21	7.25	7.26	7.19	7.22	7.24	7.23	7.18	7.28	7.3	7.24	7.29	7.24	7.26	7.27	7.26	7.25	7.16	7.25	7.26	7.36
0hBxiSlaC4J6CEo0rk	9.36	8.8	8.55	9.74	9.5	8.95	8.69	9.29	8.71	9.14	9.36	9.94	8.99	9.14	8.72	8.37	9.04	9.14	9.71	8.93	8.7	8.76	8.48	8.62	8.65	8.64	8.6	9.57	9.27	9.2	8.75	9.29	9.67	8.46	8.2	8.85	8.77	8.3	9.11	8.88	8.75	8.57	8.89	8.83	10.03	8.88	8.43	9.46	9.33
0Hcl_UC56TqksEopUE	7.32	7.26	7.27	7.24	7.32	7.34	7.23	7.33	7.27	7.28	7.22	7.33	7.33	7.34	7.3	7.31	7.31	7.26	7.26	7.22	7.21	7.24	7.21	7.19	7.46	7.29	7.25	7.3	7.25	7.29	7.34	7.25	7.25	7.34	7.21	7.23	7.29	7.32	7.34	7.31	7.36	7.28	7.25	7.29	7.23	7.32	7.25	7.33	7.38
0hCt0d7ZUpIJECuSz4	7.15	7.24	7.16	7.18	7.22	7.17	7.18	7.22	7.16	7.22	7.22	7.22	7.15	7.12	7.18	7.21	7.19	7.23	7.19	7.18	7.19	7.16	7.18	7.15	7.2	7.32	7.17	7.23	7.22	7.13	7.12	7.15	7.14	7.11	7.17	7.13	7.19	7.11	7.21	7.16	7.13	7.24	7.23	7.13	7.14	7.19	7.21	7.18	7.21
0HdI_3XXw6g7XUUKkI	7.11	7.14	7.13	7.19	7.09	7.2	7.2	7.22	7.15	7.18	7.12	7.23	7.16	7.12	7.24	7.17	7.15	7.16	7.19	7.18	7.22	7.25	7.2	7.18	7.18	7.09	7.15	7.12	7.25	7.12	7.15	7.16	7.11	7.13	7.11	7.23	7.12	7.11	7.14	7.19	7.18	7.16	7.18	7.15	7.27	7.21	7.22	7.18	7.17
0hEailPubl0ZeVO1NM	7.43	7.58	8.01	7.79	7.81	7.33	7.35	7.27	8.2	7.7	7.51	7.93	7.4	7.44	7.38	7.84	7.76	7.51	7.19	7.18	7.2	7.12	7.17	7.11	7.18	7.29	7.28	7.27	7.16	7.29	7.19	7.2	7.24	7.18	7.28	7.4	7.38	7.19	7.25	7.3	7.37	7.33	7.41	7.27	7.56	7.2	7.16	7.21	7.23
0HeckXXV.VQrJE3p0c	8.85	8.55	8.67	8.95	8.7	8.08	8.23	8.36	8.61	8.42	8.34	8.38	8.39	8.31	8.16	8.2	8.26	8.32	8.38	7.92	8.33	7.75	8.12	8.05	8.13	9.02	8.26	8.71	8.85	8.53	8.69	8.55	8.54	8.57	8.31	8.08	8.92	8.27	8.45	8.57	8.29	8.47	8.19	8.21	8.29	8.33	8.37	8.56	8.55
0HelXOmuilLH_QBRgE	10.91	11.25	10.96	10.57	10.54	10.62	10.82	10.76	10.62	10.78	11.77	10.14	11.09	11.43	11.32	9.92	10.2	10.76	11.73	11.55	11.02	10.26	10.41	10.95	10.38	11.65	10.75	11.48	10.09	11.47	11.75	11.24	11	11.75	10.96	10.55	10.11	10.21	11.01	11.33	11.36	10.32	10.96	10.47	10.86	10.49	11.05	10.88	10.23
0heq4UFP4uqfuKgCU4	7.3	7.44	7.32	7.34	7.42	7.41	7.45	7.37	7.34	7.34	7.26	7.27	7.41	7.35	7.32	7.39	7.36	7.34	7.48	7.3	7.46	7.52	7.48	7.59	7.54	7.36	7.43	7.46	7.41	7.35	7.36	7.34	7.4	7.3	7.34	7.47	7.34	7.28	7.37	7.32	7.39	7.29	7.42	7.27	7.3	7.32	7.54	7.37	7.32
0hFFJVSweCSBekqK3g	7.23	7.2	7.21	7.21	7.2	7.15	7.2	7.15	7.17	7.18	7.21	7.27	7.21	7.16	7.13	7.17	7.19	7.24	7.21	7.2	7.21	7.22	7.21	7.19	7.21	7.18	7.23	7.2	7.22	7.2	7.19	7.19	7.25	7.23	7.17	7.22	7.21	7.19	7.22	7.13	7.22	7.17	7.2	7.21	7.18	7.15	7.21	7.26	7.15
0HfjqCGNUepoh7FuxU	7.27	7.3	7.35	7.32	7.29	7.42	7.51	8.19	7.53	7.24	7.47	7.51	7.37	7.32	7.63	7.35	7.36	7.39	9.25	8.38	8.07	7.6	7.56	7.6	8.07	7.3	7.48	7.28	8.68	7.44	7.74	7.36	7.3	7.87	7.27	8.62	7.38	7.36	7.44	7.83	9.78	7.34	7.32	7.23	7.36	7.62	8.23	7.44	7.47
0hfXLXyULxAqfPct0k	7.17	7.18	7.2	7.1	7.13	7.17	7.19	7.15	7.16	7.14	7.15	7.13	7.12	7.12	7.22	7.14	7.13	7.1	7.19	7.17	7.19	7.19	7.15	7.16	7.13	7.17	7.18	7.18	7.17	7.16	7.13	7.16	7.16	7.17	7.16	7.12	7.16	7.17	7.18	7.2	7.18	7.14	7.1	7.09	7.2	7.18	7.15	7.19	7.13
0HG9VKfgDCbXnq_nmk	7.19	7.19	7.21	7.28	7.18	7.27	7.19	7.22	7.24	7.29	7.19	7.31	7.1	7.16	7.16	7.18	7.22	7.29	7.34	7.2	7.28	7.2	7.23	7.18	7.2	7.2	7.19	7.2	7.39	7.19	7.34	7.23	7.15	7.16	7.19	7.39	7.29	7.21	7.41	7.22	7.19	7.2	7.19	7.36	7.24	7.22	7.17	7.23	7.35
0hGKInkZIQBIVqq4As	7.41	7.46	7.46	7.47	7.47	7.45	7.36	7.44	7.47	7.43	7.48	7.5	7.58	7.48	7.47	7.41	7.45	7.49	7.57	7.72	7.66	7.62	7.42	7.68	7.78	7.56	7.47	7.58	7.59	7.48	7.5	7.67	7.5	7.58	7.44	7.6	7.44	7.48	7.55	7.51	7.62	7.47	7.46	7.44	7.35	7.5	7.58	7.51	7.38
0hISVSX0KIJ5CNRTRc	7.25	7.16	7.17	7.16	7.2	7.21	7.14	7.17	7.17	7.13	7.17	7.18	7.23	7.22	7.2	7.17	7.18	7.15	7.16	7.17	7.2	7.17	7.13	7.15	7.16	7.13	7.21	7.2	7.17	7.24	7.31	7.1	7.18	7.24	7.18	7.12	7.14	7.17	7.19	7.22	7.23	7.14	7.19	7.25	7.16	7.15	7.16	7.19	7.13
0hkUaefTUdQSo6qP4g	7.42	7.41	7.4	7.3	7.38	7.46	7.49	7.45	7.38	7.36	7.43	7.35	7.44	7.48	7.45	7.32	7.38	7.48	7.78	7.96	7.56	7.9	7.68	8.2	7.9	7.5	7.33	7.6	7.66	7.5	7.49	7.57	7.5	7.54	7.31	7.62	7.4	7.33	7.52	7.46	7.49	7.37	7.3	7.36	7.33	7.57	7.72	7.45	7.34
0hLjntvRWEBHh9xNro	9.2	9.48	9.46	9.19	9.43	10.61	10.62	10.57	9.68	9.77	9.71	9.83	10.17	9.3	10.7	9.89	9.77	9.23	10.59	10.43	9.97	10.06	10.53	10.23	10.45	9.22	10.4	9.15	9.61	9.21	10.31	8.84	10.08	9.85	10.31	9.89	10.23	9.93	9.89	10.2	9.21	9.48	9.19	10.41	9.15	9.89	9.17	10.67	9.64
0HmH95ei7OHkTh2quo	11.08	10.25	9.5	10.57	9.34	9.37	9.83	9.16	10.37	8.18	9.71	10.44	9.77	8.65	10.06	10.89	12.14	10.97	10.96	9.7	10.76	12.31	10.92	11.47	10.69	8.95	10.9	10.73	10.35	10.16	10.96	9.65	11.38	10.06	9.94	10.23	11.49	10.18	11.83	10.46	10.76	9.45	8.42	10.89	9.19	10.6	10.42	10.46	9.94
0HMVdH0F1dFPpJckfk	12.35	12.69	12.34	12.75	12.53	12.54	13.35	12.65	12.55	12.44	12.88	12.35	13.52	13.04	12.18	12.39	12.07	13.59	12.27	12.71	11.95	12.2	12.27	12.8	12.71	12.39	13.05	12.4	13.41	13.15	12.91	11.16	12.28	13.28	13.01	13.32	12.31	12.87	13.78	12.56	12.82	12.99	11.98	14.46	12.21	13.19	13.88	13.07	13.25
0hN0lCFQKEJSKp5EiI	7.43	7.38	7.39	7.39	7.42	7.37	7.36	7.39	7.5	7.35	7.39	7.44	7.48	7.42	7.4	7.35	7.46	7.49	7.43	7.38	7.33	7.47	7.52	7.81	7.69	7.45	7.37	7.42	7.55	7.49	7.47	7.46	7.44	7.46	7.38	7.45	7.39	7.43	7.38	7.56	7.46	7.41	7.4	7.39	7.4	7.46	7.37	7.45	7.43
0HneyjgWJgWS50VKSE	7.05	7.11	7.12	7.06	7.06	7.13	7.12	7.12	7.05	7.11	7.12	7.09	7.06	7.07	7.11	7.02	7.06	7.09	7.11	7.15	7.17	7.01	7.03	7.05	7.06	7.09	7.1	7.09	7.11	7.08	7.08	7.07	7.04	7.04	7.22	7.07	7.08	7.08	7.08	7.05	7.14	7.11	7.1	7.11	7.09	7.06	7.08	7.11	7.08
0hNnDhFRCk5wQoZ7IY	7.1	7.15	7.11	7.2	7.13	7.19	7.14	7.04	7.12	7.3	7.18	7.14	7.08	7.13	7.19	7.14	7.14	7.19	7.21	7.22	7.22	7.21	7.21	7.18	7.2	7.14	7.16	7.22	7.26	7.13	7.18	7.17	7.17	7.16	7.14	7.22	7.11	7.13	7.18	7.19	7.16	7.09	7.14	7.14	7.17	7.22	7.18	7.13	7.1
0ho6XfpFTd.pOBjuqA	7.5	7.32	7.35	7.28	7.34	7.33	7.37	7.39	7.37	7.26	7.27	7.22	7.43	7.32	7.29	7.36	7.38	7.2	7.24	7.32	7.25	7.2	7.29	7.27	7.21	7.37	7.3	7.38	7.23	7.31	7.51	7.4	7.38	7.28	7.3	7.27	7.39	7.29	7.4	7.31	7.38	7.31	7.28	7.43	7.38	7.43	7.28	7.34	7.23
0hpzIAHQOj59UBV1UU	7.21	7.34	7.35	7.33	7.31	7.19	7.21	7.26	7.28	7.22	7.35	7.25	7.25	7.14	7.2	7.22	7.28	7.28	7.14	7.19	7.2	7.17	7.2	7.17	7.2	7.18	7.21	7.24	7.2	7.23	7.23	7.16	7.21	7.22	7.17	7.21	7.22	7.24	7.22	7.27	7.19	7.25	7.22	7.24	7.15	7.21	7.19	7.16	7.19
0HqEIpaKoSF_gJDqeQ	7.33	7.4	7.34	7.51	7.26	7.26	7.28	7.36	7.39	7.29	7.34	7.24	7.36	7.28	7.32	7.31	7.35	7.28	7.48	7.36	7.41	7.33	7.45	7.24	7.64	7.35	7.28	7.43	7.39	7.41	7.52	7.45	7.33	7.39	7.28	7.48	7.27	7.34	7.56	7.57	7.63	7.24	7.3	7.23	7.21	7.39	7.45	7.41	7.25
0hRAvgg9NC3M.z3vfM	7.34	7.3	7.3	7.22	7.28	7.38	7.26	7.33	7.31	7.27	7.36	7.28	7.37	7.2	7.38	7.33	7.33	7.23	7.44	7.2	7.31	7.22	7.28	7.19	7.27	7.31	7.25	7.32	7.3	7.25	7.34	7.38	7.33	7.28	7.34	7.27	7.31	7.31	7.33	7.29	7.32	7.28	7.16	7.23	7.32	7.19	7.28	7.33	7.21
0hRBOKUeiGTOLCpHho	8.74	9.28	9.59	8.67	8.4	9.16	8.71	8.86	8.67	9.39	9.41	9.23	8.83	9.32	8.77	8.89	8.69	8.47	8.26	8.26	8.53	8.42	8.41	8.33	8.46	8.76	8.77	8.79	8.57	8.96	8.7	9.07	8.49	8.58	8.87	8.45	9.77	8.57	8.44	8.44	8.72	8.69	9.59	8.88	8.84	8.64	8.76	8.61	8.83
0HrBRC4Hfk6P9JXt0Q	7.2	7.21	7.22	7.2	7.16	7.21	7.22	7.2	7.23	7.17	7.2	7.14	7.22	7.12	7.18	7.19	7.15	7.19	7.18	7.18	7.21	7.22	7.2	7.17	7.22	7.18	7.1	7.21	7.2	7.18	7.22	7.22	7.19	7.24	7.2	7.15	7.24	7.26	7.16	7.29	7.18	7.2	7.14	7.21	7.23	7.2	7.2	7.21	7.26
0hSL9Rp7.gQ1LHSXno	7.27	7.28	7.25	7.28	7.26	7.35	7.25	7.34	7.29	7.29	7.26	7.34	7.41	7.28	7.23	7.26	7.3	7.26	7.23	7.23	7.25	7.31	7.29	7.24	7.19	7.31	7.26	7.22	7.36	7.16	7.19	7.29	7.31	7.26	7.29	7.42	7.32	7.3	7.38	7.22	7.32	7.29	7.32	7.22	7.37	7.29	7.21	7.24	7.42
0HSrRIJ0Fu1PoCnfHY	7.12	7.15	7.16	7.17	7.17	7.12	7.18	7.25	7.11	7.18	7.16	7.15	7.21	7.12	7.21	7.09	7.1	7.18	7.14	7.19	7.19	7.18	7.15	7.13	7.18	7.12	7.14	7.15	7.25	7.15	7.2	7.16	7.12	7.21	7.18	7.15	7.13	7.15	7.16	7.19	7.12	7.05	7.19	7.16	7.21	7.15	7.18	7.14	7.2
0ht6X0geTR7SIvqUKI	7.07	7.12	7.14	7.12	7.05	7.14	7.12	7.08	7.09	7.1	7.16	7.16	7.07	7.11	7.13	7.08	7.14	7.1	7.14	7.19	7.2	7.19	7.14	7.17	7.21	7.12	7.12	7.11	7.15	7.15	7.08	7.03	7.11	7.14	7.09	7.13	7.07	7.08	7.07	7.12	7.09	7.14	7.05	7.1	7.09	7.16	7.18	7.1	7.08
0Hu_l4IiKW9SqEtJE4	7.46	7.35	7.35	7.33	7.29	7.4	7.45	7.38	7.42	7.43	7.39	7.27	7.32	7.34	7.37	7.36	7.35	7.47	7.33	7.5	7.47	7.62	7.65	7.58	7.43	7.37	7.49	7.43	7.5	7.44	7.42	7.39	7.38	7.48	7.41	7.45	7.36	7.34	7.37	7.39	7.37	7.49	7.37	7.4	7.36	7.37	7.38	7.4	7.27
0hUB4WLCklkhEoEhIo	7.2	7.12	7.11	7.1	7.16	7.17	7.15	7.11	7.12	7.18	7.15	7.22	7.14	7.11	7.14	7.16	7.13	7.15	7.16	7.19	7.2	7.19	7.16	7.18	7.18	7.19	7.21	7.18	7.17	7.16	7.16	7.21	7.16	7.09	7.21	7.15	7.12	7.17	7.15	7.18	7.18	7.16	7.12	7.25	7.21	7.19	7.21	7.12	7.18
0huzHe6CC4bYnSXHKE	7.1	7.13	7.22	7.09	7.11	7.14	7.09	7.14	7.15	7.15	7.16	7.12	7.14	7.18	7.14	7.18	7.07	7.12	7.21	7.19	7.24	7.2	7.18	7.18	7.2	7.21	7.1	7.15	7.21	7.21	7.2	7.13	7.2	7.14	7.15	7.23	7.11	7.15	7.18	7.13	7.1	7.18	7.14	7.1	7.13	7.19	7.26	7.1	7.14
0HvFfNXrRNSohmtSaU	7.22	7.3	7.22	7.22	7.26	7.34	7.29	7.27	7.2	7.21	7.27	7.3	7.26	7.37	7.36	7.3	7.25	7.29	7.25	7.27	7.31	7.34	7.3	7.48	7.28	7.32	7.29	7.24	7.43	7.29	7.36	7.28	7.35	7.24	7.29	7.25	7.29	7.3	7.29	7.29	7.31	7.26	7.3	7.26	7.2	7.3	7.52	7.32	7.31
0hVMfN96eN9ee66A4o	7.29	7.45	7.3	7.39	7.22	7.55	7.25	7.36	7.33	7.28	7.41	7.27	7.4	7.22	7.32	7.4	7.3	7.51	8.34	7.49	7.34	7.62	7.4	7.56	7.53	7.27	7.27	7.17	7.27	7.2	7.29	7.22	7.4	7.68	7.37	7.39	7.25	7.28	7.35	7.25	7.62	7.25	7.25	7.3	7.36	7.34	7.56	7.22	7.24
0hWiyqp2oU4o4UkA9A	8.89	8.55	8.47	8.56	8.98	9.03	8.9	8.86	8.38	9.08	8.82	8.74	8.97	8.96	8.71	8.69	8.51	8.63	8.85	8.82	8.48	8.34	8.54	8.33	8.61	8.92	8.39	8.72	8.42	8.68	9.37	8.31	8.92	8.64	8.37	8.33	8.48	8.4	8.31	8.86	8.86	8.8	8.92	8.88	8.81	8.33	8.67	8.65	8.23
0HXAjxCLLiqSIrrdJ0	7.16	7.2	7.13	7.13	7.18	7.21	7.15	7.2	7.19	7.19	7.17	7.07	7.19	7.12	7.17	7.12	7.13	7.11	7.11	7.16	7.16	7.08	7.08	7.08	7.12	7.24	7.08	7.17	7.13	7.21	7.13	7.2	7.22	7.12	7.13	7.07	7.17	7.18	7.16	7.21	7.12	7.2	7.12	7.12	7.14	7.1	7.09	7.2	7.19
0HXgZUle1XFVLANA7k	7.33	7.47	7.77	7.65	7.55	7.35	7.49	7.58	7.37	7.45	7.7	7.55	7.37	7.39	7.24	7.59	8	7.58	7.23	7.19	7.23	7.18	7.2	7.17	8.25	7.24	7.48	7.24	7.3	7.25	7.24	7.53	7.17	7.26	7.46	7.26	7.37	7.88	7.23	7.37	7.29	7.48	7.65	7.51	7.35	7.18	7.29	7.19	7.21
0hXhJ6OQFgkhJC9UpM	7.31	7.25	7.24	7.23	7.34	7.28	7.25	7.35	7.3	7.28	7.38	7.2	7.33	7.21	7.27	7.29	7.29	7.21	7.18	7.19	7.21	7.17	7.16	7.18	7.19	7.33	7.26	7.27	7.16	7.31	7.29	7.26	7.31	7.19	7.28	7.1	7.27	7.21	7.27	7.23	7.34	7.32	7.21	7.12	7.29	7.16	7.21	7.34	7.2
0hxM0KSCsHkYiDkGjk	7.52	7.74	7.67	7.78	7.63	7.54	7.5	7.51	7.64	7.99	7.4	7.8	7.29	7.86	7.76	7.75	7.82	7.42	7.23	7.25	7.28	7.25	7.24	7.31	7.2	7.26	7.62	7.26	7.27	7.19	7.24	7.36	7.28	7.29	7.61	7.25	7.71	7.28	7.32	7.19	7.2	7.65	8.22	8.16	8.15	7.21	7.23	7.25	7.45
0hXU9dDuql_NfASqe0	7.41	7.32	7.43	7.42	7.46	7.51	7.32	7.41	7.39	7.41	7.36	7.26	7.39	7.4	7.45	7.4	7.39	7.26	7.41	7.43	7.35	7.5	7.27	7.43	7.29	7.46	7.38	7.5	7.26	7.48	7.35	7.52	7.42	7.4	7.36	7.32	7.37	7.28	7.45	7.35	7.48	7.42	7.35	7.37	7.39	7.52	7.37	7.51	7.34
0hzNQixSABJMong.XE	7.09	7.16	7.11	7.17	7.13	7.16	7.14	7.17	7.18	7.19	7.08	7.18	7.1	7.1	7.13	7.11	7.06	7.13	7.13	7.17	7.18	7.16	7.15	7.18	7.14	7.14	7.27	7.17	7.18	7.16	7.13	7.13	7.12	7.14	7.13	7.12	7.05	7.23	7.16	7.14	7.14	7.11	7.13	7.1	7.13	7.19	7.12	7.16	7.09
0I1y1GOwf9A5IDCU.s	7.07	7.12	7.15	7.22	7.09	7.12	7.14	7.15	7.13	7.11	7.06	7.1	7.17	7.32	7.12	7.1	7.12	7.14	7.19	7.17	7.18	7.11	7.09	7.15	7.12	7.09	7.07	7.04	7.16	7.11	7.09	7.11	7.1	7.11	7.05	7.19	7.1	7.13	7.13	7.13	7.08	7.06	7.12	7.16	7.1	7.1	7.12	7.04	7.28
0i3RAg035hVRzptyek	7.22	7.21	7.18	7.25	7.2	7.18	7.23	7.23	7.24	7.21	7.24	7.18	7.16	7.32	7.26	7.2	7.19	7.23	7.32	7.5	7.33	7.31	7.36	7.72	7.24	7.2	7.24	7.25	7.49	7.23	7.31	7.26	7.26	7.24	7.24	7.3	7.22	7.22	7.21	7.25	7.18	7.25	7.31	7.31	7.32	7.37	7.33	7.23	7.16
0I4A6CqamZyly16ep0	7.38	7.35	7.38	7.26	7.36	7.4	7.28	7.22	7.37	7.33	7.27	7.27	7.31	7.28	7.36	7.32	7.28	7.27	7.46	7.35	7.42	7.3	7.73	7.68	7.38	7.37	7.4	7.45	7.37	7.49	7.64	7.5	7.47	7.43	7.46	7.49	7.39	7.63	7.53	7.6	7.31	7.34	7.31	7.32	7.39	7.73	7.55	7.37	7.49
0I4gnrBIhQDL_iHAg0	7.15	7.13	7.19	7.15	7.16	7.12	7.12	7.08	7.08	7.09	7.13	7.13	7.14	7.11	7.12	7.1	7.11	7.15	7.18	7.18	7.18	7.15	7.14	7.15	7.19	7.1	7.09	7.1	7.16	7.09	7.14	7.04	7.13	7.1	7.09	7.14	7.1	7.15	7.14	7.16	7.15	7.11	7.06	7.09	7.14	7.19	7.14	7.12	7.15
0i56uyG6TK7u5K3vq4	7.26	7.15	7.25	7.25	7.2	7.19	7.28	7.25	7.17	7.27	7.26	7.23	7.2	7.12	7.18	7.27	7.23	7.24	7.21	7.19	7.24	7.2	7.19	7.18	7.23	7.13	7.16	7.17	7.19	7.2	7.13	7.09	7.15	7.13	7.28	7.44	7.32	7.19	7.14	7.19	7.23	7.3	7.31	7.28	7.28	7.26	7.27	7.2	7.12
0I5Ed51dOkXUZASV8E	8.88	9.39	7.8	8.56	8.65	8.77	7.83	8.72	9.61	7.56	7.63	9.34	8.96	7.85	7.69	8.5	8.62	7.61	9.71	8.81	8.22	8.38	8.45	8.53	9.21	11.03	7.69	8.27	8.3	8.65	8.84	8.62	8	9.23	8.25	8.6	7.5	8.68	8.8	7.94	9.54	7.62	7.69	7.54	9.09	8.24	9.45	8.93	8.85
0I66_TqfXq3Ud1t6XA	12.75	11.88	12.25	11.51	11.77	12.03	12.08	11.42	11.61	12.35	12.42	11.48	12.48	11.22	11.21	12.18	11.83	12.14	11.74	13.21	12.43	12.53	13.51	13.31	12.36	12.15	11.93	13.34	12.11	12.87	13.29	12.9	12.22	11.93	12.06	12.53	12.28	12.64	12.62	12.77	12.59	12.09	11.16	11.5	10.82	13.04	12.52	12.14	12.3
0i67tJX4E3XUCIcgi0	7.27	7.29	7.25	7.3	7.3	7.36	7.34	7.48	7.28	7.22	7.26	7.35	7.28	7.32	7.25	7.3	7.29	7.31	7.29	7.21	7.25	7.36	7.35	7.32	8.12	7.26	7.36	7.24	7.26	7.26	7.35	7.35	7.27	7.43	7.24	7.23	7.31	7.39	7.3	7.37	7.4	7.25	7.28	7.33	7.39	7.27	7.23	7.37	8.3
0IAFQS5FXqS.0h5JA0	7.19	7.15	7.13	7.15	7.19	7.3	7.22	7.18	7.18	7.17	7.17	7.17	7.22	7.2	7.17	7.16	7.19	7.09	7.19	7.18	7.19	7.22	7.16	7.16	7.18	7.26	7.17	7.17	7.2	7.12	7.22	7.21	7.15	7.27	7.18	7.13	7.21	7.14	7.1	7.18	7.19	7.14	7.11	7.12	7.25	7.15	7.17	7.17	7.17
0iAjq_cijrIHoJCknE	8.81	8.66	8.71	8.8	8.92	8.21	8.51	8.36	9.1	9.2	8.8	9.13	8.49	9.33	8.67	9.18	8.57	9.14	8.2	8.09	8.01	7.82	8.2	8.03	8.1	8.44	8.92	8.42	8.15	8.06	8.32	8.13	8.39	8.39	9.08	8.02	8.89	8.4	8.17	7.98	8.39	8.88	9.39	8.99	9.21	8.33	7.79	7.84	8.73
0IAJUShIuiTukK0ulk	7.14	7.14	7.12	7.17	7.11	7.19	7.1	7.11	7.08	7.12	7.18	7.18	7.14	7.09	7.14	7.16	7.09	7.13	7.18	7.17	7.21	7.16	7.17	7.19	7.18	7.11	7.09	7.15	7.18	7.16	7.15	7.16	7.21	7.17	7.13	7.22	7.1	7.15	7.16	7.18	7.15	7.15	7.17	7.12	7.07	7.2	7.15	7.16	7.2
0iaqWepud_V6Sp1lmc	7.21	7.26	7.26	7.27	7.19	7.2	7.28	7.22	7.27	7.3	7.23	7.23	7.19	7.23	7.21	7.26	7.25	7.22	7.39	7.22	7.31	7.24	7.29	7.42	7.39	7.34	7.14	7.29	7.27	7.32	7.24	7.34	7.31	7.32	7.24	7.24	7.32	7.19	7.29	7.32	7.21	7.21	7.16	7.24	7.21	7.35	7.37	7.23	7.21
0iAuhE5AiqAF4uk1ac	7.24	7.24	7.24	7.17	7.26	7.29	7.22	7.31	7.32	7.27	7.24	7.22	7.36	7.1	7.23	7.31	7.29	7.29	7.21	7.17	7.21	7.21	7.19	7.17	7.16	7.23	7.25	7.27	7.17	7.22	7.21	7.27	7.22	7.17	7.27	7.19	7.27	7.21	7.23	7.23	7.24	7.25	7.23	7.22	7.43	7.19	7.19	7.23	7.27
0iCABye6T1K6IF4SKE	9.55	8.47	9.11	9.6	8.5	9.05	8.35	8.4	9.54	9.09	8.54	8.37	8.32	8.9	9.25	8.75	9.37	7.93	10.55	9.2	9.24	7.88	8.07	8.11	7.37	8.76	9.32	8.28	7.96	7.98	8.43	8.77	9.07	8.63	8.52	8.83	8.45	8.2	9.11	8.29	9.29	8.36	8.79	8.33	9.61	8.48	8.76	8.15	8.44
0iCg5F9lKIvo6k.eHk	7.2	7.18	7.14	7.13	7.15	7.15	7.07	7.14	7.07	7.15	7.16	7.12	7.18	7.14	7.15	7.12	7.12	7.19	7.16	7.19	7.2	7.15	7.21	7.17	7.18	7.19	7.18	7.19	7.16	7.2	7.16	7.16	7.25	7.18	7.1	7.12	7.11	7.16	7.26	7.18	7.2	7.19	7.16	7.13	7.13	7.15	7.22	7.16	7.2
0ICkSh2cLvZxmqcWjY	10.04	10.51	9.99	9.79	10.37	8.9	8.94	9.69	9.44	9.86	9.61	10.59	8.97	9.85	9.9	9.5	9.44	9.4	10.64	10.36	9.73	8.84	10.95	9.5	10.03	10.41	9.58	10.22	10.57	10.02	10.3	9.48	9.43	9.59	9.96	9.75	10.01	9.89	9.94	9.61	9.84	9.76	9.69	10.27	9.91	10.3	10.01	9.93	10.96
0ICLoikKvSfxKKn7iU	7.12	7.17	7.06	7.11	7.06	7.15	7.11	7.19	7.14	7.2	7.08	7.18	7.18	7.08	7.16	7.13	7.19	7.19	7.17	7.16	7.15	7.19	7.14	7.14	7.17	7.14	7.19	7.19	7.18	7.06	7.19	7.08	7.12	7.13	7.21	7.11	7.2	7.11	7.13	7.13	7.09	7.16	7.28	7.19	7.18	7.06	7.15	7.11	7.13
0idC411TfJdkgRwjzI	7.26	7.27	7.28	7.35	7.28	7.25	7.23	7.32	7.24	7.33	7.24	7.26	7.26	7.27	7.22	7.29	7.26	7.28	7.24	7.21	7.19	7.24	7.26	7.29	7.23	7.3	7.28	7.3	7.36	7.32	7.21	7.26	7.34	7.38	7.2	7.28	7.21	7.42	7.32	7.28	7.29	7.19	7.26	7.35	7.28	7.16	7.22	7.24	7.43
0IDopjiFAS9VHxUihc	7.23	7.19	7.26	7.24	7.17	7.22	7.23	7.25	7.19	7.21	7.25	7.2	7.35	7.27	7.15	7.19	7.24	7.2	7.19	7.24	7.23	7.2	7.22	7.18	7.2	7.21	7.25	7.23	7.23	7.25	7.22	7.26	7.13	7.13	7.16	7.17	7.2	7.24	7.25	7.29	7.29	7.21	7.14	7.18	7.22	7.17	7.2	7.22	7.32
0ie4glSkqu4siKgiDo	7.45	7.44	7.39	7.33	7.38	7.45	7.44	7.46	7.46	7.37	7.49	7.36	7.4	7.34	7.48	7.37	7.39	7.4	7.36	7.51	7.29	7.35	7.3	7.48	7.48	7.43	7.38	7.47	7.31	7.5	7.57	7.51	7.38	7.48	7.37	7.33	7.39	7.45	7.41	7.35	7.44	7.4	7.38	7.38	7.41	7.34	7.39	7.44	7.43
0iEd5d66eSJDFQl0.o	8.97	8	9.14	8.19	8.91	8.63	9.08	8.63	8.12	9.09	8.83	8.35	8.64	9.2	8.68	8.83	8.71	9.07	8.75	8.7	9.1	10.07	9.44	9.17	9.98	8.87	8.84	8.74	9.32	9.09	8.83	9.04	8.9	8.59	8.71	9.02	8.23	9.18	8.71	9.13	8.7	8.77	9.29	8.24	8.62	9.28	9.18	8.98	8.69
0IED_w.UqvCiGOqkoI	7.53	7.38	7.43	7.4	7.55	7.68	7.73	7.48	7.44	7.35	7.49	7.33	7.32	7.42	7.45	7.46	7.41	7.36	7.65	7.47	7.49	7.71	7.59	7.58	7.54	7.55	7.5	7.54	7.51	7.5	7.53	7.56	7.4	7.43	7.35	7.43	7.36	7.41	7.49	7.55	7.49	7.43	7.4	7.35	7.34	7.49	7.5	7.62	7.38
0ieHuoN4Rp0Ap3Izkk	7.36	7.23	7.51	7.52	7.46	7.2	7.55	7.66	7.92	7.22	7.33	7.59	7.4	7.34	7.54	7.42	7.81	7.26	7.14	7.27	7.25	7.66	7.18	7.18	7.32	7.4	7.99	7.37	7.55	7.58	7.16	7.24	7.18	7.53	7.43	8.2	7.56	7.75	7.53	7.2	7.45	7.36	7.55	7.83	7.36	7.87	7.61	7.48	7.41
0iEqd.Ud_ARL.1U6So	7.3	7.39	7.48	7.4	7.34	7.49	7.4	7.34	7.45	7.25	7.29	7.29	7.54	7.33	7.31	7.34	7.31	7.47	7.37	7.54	7.38	7.53	7.2	7.39	7.39	7.28	7.24	7.36	7.36	7.3	7.25	7.26	7.34	7.4	7.38	7.35	7.33	7.35	7.33	7.29	7.28	7.3	7.37	7.45	7.4	7.35	7.5	7.24	7.32
0IfZJSCKY5bq0DcoUU	7.07	7.18	7.16	7.11	7.11	7.12	7.05	7.07	7.08	7.07	7.11	7.13	7.11	7.1	7.1	7.11	7.11	7.14	7.13	7.18	7.18	7.16	7.11	7.16	7.14	7.12	7.1	7.07	7.15	7.13	7.06	7.06	7.08	7.15	7.1	7.11	7.09	7.12	7.13	7.16	7.19	7.17	7.07	7.12	7.14	7.13	7.12	7.17	7.08
0igAo4bnl_kwoBR2pU	7.09	7.1	7.13	7.1	7.2	7.14	7.12	7.09	7.08	7.11	7.17	7.1	7.15	7.13	7.15	7.07	7.07	7.13	7.13	7.19	7.19	7.14	7.16	7.14	7.15	7.18	7.07	7.15	7.15	7.1	7.18	7.12	7.08	7.2	7.1	7.18	7.07	7.2	7.11	7.12	7.12	7.13	7.12	7.06	7.12	7.09	7.13	7.08	7.06
0igIDypdd43dnN5q14	12.33	11.99	11.97	12.3	12.18	10.95	11.99	11.94	11.89	12.08	12.84	12.21	11.98	12.73	11.55	12.57	11.98	10.44	12.18	11.71	12.14	12.34	12.59	11.99	12.23	13.02	11.88	12.84	12.54	12.62	12.31	12.19	11.44	12.22	12.43	12.33	12.41	12.39	11.87	12.58	11.95	13.08	11.84	11.45	12.29	12.31	12.08	11.5	12.43
0iH4wNpeIAwsOdSHJ0	7.08	7.12	7.18	7.12	7.1	7.15	7.08	7.11	7.13	7.05	7.15	7.21	7.09	7.12	7.11	7.08	7.13	7.12	7.19	7.18	7.19	7.15	7.15	7.14	7.12	7.14	7.14	7.12	7.18	7.02	7.16	7.06	7.14	7.14	7.11	7.17	7.1	7.08	7.06	7.15	7.18	7.11	7.11	7.1	7.13	7.17	7.15	7.1	7.05
0IhC7ongoPsqAyJ6JU	7.3	7.29	7.34	7.27	7.17	7.43	7.3	7.26	7.54	7.38	7.24	7.22	7.32	7.23	7.4	7.46	7.35	7.36	7.2	7.2	7.22	7.2	7.19	7.17	7.19	7.21	7.24	7.19	7.23	7.21	7.23	7.21	7.17	7.17	7.27	7.19	7.24	7.13	7.19	7.23	7.19	7.29	7.35	7.28	7.69	7.2	7.18	7.17	7.2
0iIE5buX8vJEmpJdLg	11.91	11.94	11.68	10.49	11.04	12.47	13.51	12.36	12.78	8.09	11.33	11.6	12.24	10.52	12.77	11.36	13.16	10.35	12.49	11.79	12.55	10.12	10.09	10.68	11.82	8.78	13.05	10.55	11.47	11.63	11.5	10.53	11.14	13.18	10.99	12.7	9.38	11.35	12.82	13.55	11.74	10.83	9.36	11.43	10.11	10.77	13.09	11.92	11.4
0iiee1.hxJuXiNehFs	7.31	7.33	7.39	7.63	7.44	7.21	7.34	7.42	7.31	7.17	8.11	7.32	7.4	7.56	7.28	7.32	7.22	8.52	7.33	7.18	7.19	7.21	7.15	7.14	7.19	7.12	7.36	7.19	7.16	7.21	7.22	7.2	7.18	7.79	7.26	7.29	7.23	7.18	7.29	7.27	7.26	7.28	7.12	7.24	7.36	7.24	7.17	7.23	7.13
0iieSPJyqEnoPOen3g	7.38	7.29	7.31	7.35	7.27	7.29	7.42	7.51	7.29	7.23	7.36	7.3	7.54	7.27	7.37	7.41	7.42	7.25	7.27	7.19	7.36	9.4	7.55	7.19	7.74	7.32	7.65	7.41	7.81	7.57	7.36	7.33	7.54	7.5	7.34	7.29	7.98	7.5	7.43	7.44	7.37	7.34	7.25	7.41	7.44	7.26	7.21	7.47	7.35
0iIK00EkCUiuiRXiUg	7.48	7.3	7.43	7.46	7.34	7.46	7.47	7.5	7.27	7.52	7.7	7.69	7.48	7.34	7.3	7.55	7.47	7.73	7.42	7.53	7.33	7.54	7.59	7.19	7.59	7.25	7.29	7.22	7.62	7.27	7.25	7.31	7.25	7.34	7.98	7.5	7.56	7.25	7.2	7.27	7.26	7.46	7.76	7.66	7.71	7.51	7.46	7.22	7.33
0IiKU36E1y174HSOHk	7.23	7.3	7.34	7.13	7.2	7.25	7.23	7.2	7.25	7.17	7.21	7.15	7.22	7.27	7.35	7.24	7.17	7.44	7.32	7.2	7.21	7.21	7.22	7.18	7.22	7.29	7.29	7.23	7.2	7.2	7.28	7.25	7.24	7.37	7.26	7.3	7.15	7.25	7.3	7.25	7.18	7.27	7.25	7.24	7.24	7.24	7.35	7.3	7.22
0ij3wqJR1FOc8Id6SI	7.2	7.2	7.18	7.21	7.25	7.33	7.21	7.31	7.29	7.24	7.17	7.22	7.24	7.17	7.2	7.16	7.21	7.18	7.23	7.23	7.54	7.21	7.52	7.19	7.29	7.19	7.31	7.2	7.22	7.23	7.23	7.22	7.23	7.16	7.2	7.51	7.16	7.33	7.21	7.24	7.19	7.2	7.2	7.24	7.25	7.2	7.34	7.29	7.36
0iJcnEiUlUrFQCACZ4	7.23	7.32	7.19	7.23	7.23	7.32	7.22	7.48	7.26	7.25	7.24	7.22	7.2	7.25	7.3	7.31	7.24	7.25	7.31	7.48	7.57	7.24	7.46	7.47	7.23	7.22	7.22	7.2	7.28	7.42	7.24	7.23	7.27	7.26	7.29	7.29	7.21	7.36	7.32	7.17	7.26	7.18	7.29	7.18	7.25	7.37	7.28	7.21	7.17
0iJfeoSP9deverOCfk	7.22	7.26	7.15	7.25	7.18	7.19	7.25	7.3	7.25	7.27	7.16	7.57	7.13	7.19	7.31	7.19	7.24	7.16	7.19	7.19	7.28	7.24	7.27	7.17	7.33	7.16	7.26	7.24	7.28	7.21	7.25	7.27	7.25	7.25	7.24	7.24	7.23	7.24	7.3	7.22	7.22	7.22	7.24	7.3	7.15	7.25	7.22	7.21	7.4
0iJFiKc6CdH3ilS1VY	7.26	7.31	7.33	7.31	7.31	7.3	7.3	7.26	7.31	7.25	7.4	7.33	7.23	7.26	7.28	7.32	7.34	7.39	7.46	7.45	7.26	7.54	7.53	7.59	7.43	7.26	7.38	7.27	7.26	7.25	7.34	7.28	7.28	7.3	7.31	7.35	7.34	7.29	7.29	7.29	7.28	7.31	7.33	7.25	7.39	7.38	7.27	7.29	7.31
0iJVdQJoQbXANVB.1U	7.1	7.19	7.17	7.23	7.24	7.11	7.14	7.11	7.18	7.16	7.13	7.1	7.1	7.13	7.24	7.1	7.17	7.13	7.15	7.19	7.2	7.17	7.19	7.16	7.17	7.16	7.17	7.1	7.19	7.16	7.14	7.12	7.11	7.22	7.15	7.15	7.2	7.16	7.15	7.24	7.07	7.11	7.17	7.13	7.15	7.13	7.21	7.15	7.17
0iJxSjnAHg_4yuM5Ak	7.16	7.16	7.13	7.16	7.17	7.2	7.23	7.16	7.16	7.14	7.21	7.15	7.13	7.22	7.22	7.14	7.12	7.13	7.16	7.19	7.19	7.17	7.13	7.14	7.13	7.13	7.14	7.18	7.16	7.18	7.19	7.23	7.2	7.16	7.18	7.25	7.14	7.2	7.22	7.25	7.2	7.13	7.19	7.1	7.1	7.16	7.18	7.23	7.19
0IKDp61Ip.7UdXdHoI	8.63	8.46	9.03	8.39	9.61	8.24	8.27	7.86	8.21	9.34	8.46	7.96	8.54	8.53	8.53	8.46	8.45	8.98	8.03	8.33	8.61	8.77	8.18	8.39	8.63	8.86	8.02	8.49	8.53	8.91	8.09	8.6	8.23	8.56	8.5	8.7	8.33	8.5	8.52	8.68	8.58	8.39	8.93	7.94	8.1	7.84	8.5	8.35	8.32
0ikflWl3J5UouP7vfI	7.22	7.33	7.35	7.36	7.25	7.22	7.27	7.34	7.27	7.33	7.23	7.28	7.23	7.35	7.33	7.23	7.25	7.37	7.23	7.33	7.25	7.2	7.21	7.22	7.35	7.26	7.15	7.27	7.31	7.17	7.26	7.25	7.26	7.25	7.22	7.22	7.21	7.32	7.29	7.28	7.22	7.2	7.21	7.26	7.3	7.32	7.26	7.26	7.25
0IKJJbkopP0pNviqLs	7.5	7.39	7.51	7.32	7.43	7.47	7.42	7.42	7.4	7.39	7.54	7.33	7.52	7.36	7.53	7.43	7.42	7.43	7.37	7.27	7.99	7.6	7.23	7.47	7.93	7.4	7.65	7.5	7.88	7.5	7.45	7.6	7.6	7.43	7.42	7.25	7.7	7.52	7.6	8.31	7.46	7.48	7.4	7.35	7.27	7.26	7.26	7.66	7.4
0ikVR9S4ILXWQdUBCU	7.22	7.25	7.32	7.38	7.21	7.23	7.6	7.28	7.39	7.17	7.36	7.2	7.21	7.16	7.34	7.45	7.2	7.44	7.18	7.19	7.25	7.15	7.18	7.22	7.39	7.22	7.21	7.23	7.2	7.37	7.2	7.42	7.24	7.16	7.42	7.37	7.18	7.32	7.42	7.24	7.2	7.86	7.25	7.15	7.14	7.29	7.19	7.18	7.23
0ileijpIqBKKAEC0Tk	7.34	7.24	7.18	7.28	7.25	7.26	7.18	7.23	7.26	7.4	7.21	7.32	7.19	7.29	7.17	7.28	7.3	7.25	7.16	7.17	7.2	7.11	7.09	7.1	7.14	7.22	7.24	7.24	7.13	7.16	7.19	7.2	7.16	7.31	7.34	7.14	7.31	7.17	7.19	7.16	7.24	7.24	7.39	7.21	7.27	7.12	7.15	7.18	7.23
0ilKeA7TN4KCAkknoQ	7.58	8.01	7.57	7.81	7.85	7.63	7.58	7.53	7.86	7.71	7.54	7.83	7.51	8.05	7.6	7.73	7.67	7.5	7.22	7.19	7.25	7.44	7.54	7.32	7.41	7.39	7.57	7.36	7.31	7.31	7.33	7.37	7.41	7.33	7.42	7.27	7.73	7.55	7.41	7.32	7.39	7.69	8.07	8.11	7.91	7.29	7.25	7.34	7.59
0Ilp7sQItIXcIdwkVU	7.09	7.14	7.17	7.17	7.16	7.11	7.1	7.11	7.2	7.08	7.15	7.05	7.06	7.16	7.17	7.1	7.1	7.1	7.21	7.18	7.23	7.18	7.18	7.18	7.19	7.16	7.11	7.16	7.18	7.15	7.17	7.15	7.2	7.23	7.14	7.17	7.07	7.13	7.16	7.17	7.19	7.13	7.13	7.08	7.15	7.21	7.24	7.11	7.12
0ilSqP.gnt.PeVU1QU	7.3	7.48	7.41	7.3	7.27	7.49	7.55	8	7.64	7.25	7.69	7.41	7.37	7.31	7.62	7.32	7.45	7.38	7.2	7.23	7.66	7.21	7.3	7.18	7.2	7.35	7.53	7.35	7.65	7.65	7.26	7.31	7.48	7.85	7.57	7.4	7.75	7.4	7.47	7.41	7.5	7.48	7.26	7.34	7.34	7.61	7.45	7.63	7.18
0imIqhCtMruiP9K.6o	7.59	7.57	7.54	7.53	7.48	7.55	7.47	7.61	7.49	7.76	7.55	7.58	7.83	7.48	7.53	7.57	7.61	7.6	7.44	7.24	7.35	7.49	7.57	7.61	7.39	7.58	7.48	7.62	7.38	7.61	7.48	7.65	7.53	7.53	7.65	7.43	7.56	7.51	7.51	7.47	7.52	7.47	7.45	7.49	7.42	7.43	7.48	7.51	7.43
0imNKASmBCg2dSKkAU	7.39	7.5	7.29	7.21	7.31	7.43	7.22	7.45	7.48	7.42	7.31	7.44	7.39	7.41	7.35	7.4	7.29	7.28	7.23	7.19	7.22	7.16	7.18	7.18	7.22	7.33	7.4	7.35	7.24	7.22	7.34	7.33	7.29	7.25	7.42	7.32	7.35	7.39	7.22	7.19	7.43	7.44	7.44	7.37	7.39	7.27	7.17	7.24	7.33
0IN0UuSVKkfeME3iSI	7.22	7.22	7.23	7.19	7.22	7.18	7.21	7.21	7.19	7.2	7.15	7.21	7.24	7.31	7.2	7.22	7.22	7.18	7.39	7.22	7.26	7.22	7.4	7.31	7.22	7.16	7.25	7.17	7.21	7.23	7.25	7.25	7.21	7.23	7.15	7.28	7.21	7.17	7.21	7.24	7.2	7.27	7.26	7.19	7.24	7.21	7.28	7.23	7.16
0ino4DtJypT.p54p3o	8.95	9.31	8.82	8.43	8.78	8.79	8.19	8.89	8.7	8.31	8.65	8.46	8.69	8.34	8.68	8.81	8.45	8.36	9.06	8.7	8.77	8.31	9.49	8.66	8.32	8.3	8.3	9.43	9.03	8.98	9.36	8.77	8.94	8.42	8.81	8.5	8.39	8.5	8.92	8.7	8.88	8.33	8.15	8.5	8.49	8.71	8.76	8.66	8.68
0IntKAiLuneVdVe4OE	7.23	7.18	7.38	7.24	7.25	7.25	7.16	7.16	7.3	7.38	7.22	7.29	7.21	7.06	7.13	7.26	7.26	7.3	7.12	7.16	7.16	7.12	7.09	7.14	7.1	7.1	7.26	7.07	7.12	7.12	7.15	7.15	7.13	7.11	7.15	7.1	7.19	7.13	7.11	7.07	7.1	7.2	7.31	7.08	7.29	7.11	7.14	7.08	7.07
0iOlPB8kuoXR.xCR50	8.94	9.14	9.3	10.09	10.01	9.43	8.82	8.75	9.51	9.59	9.6	9.62	8.94	10.3	9.3	9.54	9.41	8.57	9.01	8.74	8.7	8.62	9.06	8.81	8.62	9.26	9.02	9.38	8.78	9.11	9.05	9.36	9.08	9.24	9.65	9.14	9.4	9.58	8.83	8.72	8.92	9.45	9.87	9.09	10.01	9.5	9.48	8.64	9.4
0IOmfVfdd6dar_TqIM	8.44	8.55	8.12	9.13	8.96	8.32	8.09	8.08	7.97	8.23	8.35	8.88	8.46	8.46	8.2	8.17	8.23	8.7	8.64	9.02	8.18	8.37	8.21	7.21	7.95	7.89	7.84	8.5	9.02	8.09	8.32	9.13	8.44	8.36	8.34	8	7.95	8.27	8.3	8.08	8.56	8.33	7.99	7.78	8.61	7.92	9.09	8.6	8.89
0IoU4lCg5q6X4gnqAo	7.18	7.16	7.21	7.27	7.15	7.23	7.19	7.13	7.13	7.12	7.15	7.19	7.15	7.26	7.25	7.11	7.17	7.15	7.2	7.18	7.2	7.19	7.18	7.18	7.19	7.23	7.15	7.18	7.17	7.19	7.22	7.21	7.2	7.22	7.19	7.16	7.14	7.07	7.13	7.15	7.15	7.1	7.12	7.1	7.14	7.15	7.26	7.19	7.11
0iP2gih5qnl4IiP5dI	7.39	7.29	7.28	7.24	7.3	7.39	7.32	7.4	7.3	7.31	7.29	7.24	7.28	7.39	7.38	7.26	7.33	7.27	7.49	7.51	7.38	7.31	7.46	7.57	7.61	7.34	7.35	7.36	7.23	7.35	7.34	7.36	7.36	7.4	7.45	7.31	7.38	7.3	7.31	7.38	7.42	7.32	7.36	7.34	7.21	7.38	7.46	7.33	7.23
0ipcrCTCuUbuDNx7nI	7.15	7.14	7.14	7.14	7.18	7.18	7.2	7.17	7.18	7.13	7.17	7.11	7.2	7.17	7.21	7.15	7.16	7.16	7.2	7.21	7.2	7.18	7.17	7.17	7.17	7.23	7.19	7.22	7.16	7.19	7.15	7.19	7.18	7.13	7.2	7.16	7.15	7.18	7.16	7.12	7.15	7.21	7.19	7.13	7.22	7.17	7.19	7.2	7.19
0ipfeV3gzOuKIOqzeg	7.56	7.85	7.76	7.36	7.67	8.05	7.62	7.86	7.86	7.93	7.96	7.53	7.85	7.54	7.85	7.65	7.67	7.37	7.31	7.21	7.35	7.52	7.33	7.15	7.39	7.75	7.79	7.65	7.37	7.65	7.51	7.86	7.67	7.6	7.94	7.43	7.88	7.82	7.52	7.73	7.54	7.86	8.05	7.58	7.75	7.48	7.52	7.53	7.56
0IRgoilBI4qCU.95Do	7.37	7.51	7.4	7.29	7.32	7.2	7.17	7.36	7.32	7.57	7.47	7.56	7.25	7.51	7.19	7.34	7.6	7.43	7.19	7.2	7.23	7.19	7.33	7.18	7.25	7.26	7.34	7.23	7.22	7.15	7.19	7.22	7.27	7.17	7.32	7.22	7.42	7.29	7.2	7.27	7.19	7.34	7.81	7.68	7.6	7.23	7.22	7.2	7.68
0Irl6GKOekqWu.gnjA	7.19	7.12	7.12	7.18	7.17	7.17	7.19	7.19	7.11	7.2	7.19	7.25	7.21	7.16	7.16	7.27	7.18	7.19	7.2	7.19	7.2	7.2	7.19	7.16	7.21	7.17	7.11	7.21	7.18	7.15	7.21	7.15	7.17	7.16	7.2	7.19	7.19	7.17	7.1	7.1	7.15	7.11	7.26	7.23	7.26	7.17	7.15	7.17	7.1
0IstLlQTRo3dHgRFOU	7.67	7.87	7.77	7.79	7.51	7.72	7.71	7.63	7.83	7.94	7.73	7.52	7.68	7.66	7.66	7.92	7.62	7.76	7.58	7.95	7.83	7.74	7.68	7.61	7.52	7.54	7.64	7.52	7.72	7.57	7.54	7.44	7.61	7.87	8.21	8.04	7.61	7.86	7.77	7.72	7.58	7.83	7.71	7.56	7.98	7.64	7.7	7.51	7.6
0It7tXoBel_qK74VOg	7.28	7.24	7.16	7.28	7.24	7.26	7.21	7.27	7.24	7.22	7.21	7.21	7.25	7.22	7.23	7.22	7.24	7.17	7.25	7.21	7.31	7.3	7.23	7.18	7.36	7.2	7.22	7.21	7.29	7.21	7.22	7.2	7.26	7.21	7.31	7.25	7.17	7.17	7.23	7.18	7.24	7.22	7.19	7.17	7.22	7.35	7.21	7.18	7.17
0iT9QikLoFbrU8BXdU	7.71	7.3	7.7	7.7	7.34	7.61	8.01	8.11	7.26	7.29	7.5	7.76	7.9	7.4	7.83	7.43	7.75	7.9	8.32	7.72	8.25	8.44	7.19	7.17	8.02	7.6	7.67	7.52	8.19	7.78	7.4	7.47	7.52	7.63	7.61	7.75	7.87	7.53	8.02	8.05	7.47	7.56	7.44	7.45	7.25	7.63	7.32	8	7.65
0iTi0jeiAteIC1Qp9w	7.25	7.27	7.34	7.32	7.23	7.27	7.25	7.28	7.22	7.31	7.2	7.12	7.32	7.31	7.31	7.3	7.31	7.33	7.21	7.19	7.21	7.24	7.19	7.18	7.22	7.29	7.4	7.28	7.29	7.25	7.28	7.27	7.22	7.27	7.27	7.21	7.31	7.38	7.29	7.27	7.3	7.27	7.4	7.26	7.26	7.22	7.22	7.27	7.3
0itI5W7ftfn007FJ7o	7.12	7.25	7.15	7.22	7.14	7.16	7.16	7.15	7.15	7.16	7.12	7.17	7.15	7.18	7.16	7.16	7.18	7.15	7.29	7.42	7.23	7.26	7.21	7.23	7.19	7.21	7.18	7.17	7.29	7.19	7.13	7.16	7.18	7.23	7.13	7.21	7.17	7.11	7.22	7.19	7.13	7.18	7.16	7.19	7.19	7.25	7.21	7.18	7.22
0iTXhh1P196dVFS3xE	7.81	7.71	7.49	7.71	7.75	8.33	7.57	7.58	7.72	7.63	7.59	7.47	7.57	7.51	7.63	7.62	7.6	7.51	7.58	7.94	7.69	7.88	8.15	8.06	8.41	7.52	7.72	7.47	8.01	7.64	7.56	7.78	7.53	7.6	7.6	7.77	7.51	7.74	7.78	7.73	7.58	7.39	7.45	7.43	7.57	7.56	8.15	7.68	7.68
0iuaqfpUfroIEn_qP8	7.57	7.4	7.54	7.57	7.5	7.52	7.54	7.5	7.43	7.42	7.38	7.38	7.4	7.33	7.5	7.37	7.43	7.53	7.64	7.27	7.41	7.34	7.73	7.18	7.29	7.56	7.41	7.57	7.38	7.51	7.38	7.35	7.39	7.62	7.5	7.35	7.54	7.45	7.62	7.42	7.63	7.56	7.57	7.38	7.5	7.48	7.46	7.37	7.36
0iUl8v7V5Tce3ilNnk	10.46	10.33	10.58	10.12	9.82	10.32	10.74	10.12	10.84	11.08	9.6	9.46	10.77	10.72	10.5	10.44	10.08	11.72	10.58	10.21	11.61	10.06	9.79	9.23	9.7	10.57	10.31	10.23	9.54	10.51	10.45	8.79	10.34	10.75	10.55	10.09	9.06	10.37	10.04	10.44	10.9	10.07	10.5	9.35	10.46	9.4	10.11	9.62	9.47
0IupFm1MV1mf98_6V8	7.17	7.19	7.22	7.2	7.15	7.22	7.18	7.3	7.18	7.25	7.26	7.19	7.22	7.28	7.2	7.27	7.16	7.24	7.23	7.25	7.23	7.37	7.27	7.3	7.21	7.18	7.24	7.22	7.33	7.25	7.22	7.25	7.27	7.24	7.2	7.24	7.17	7.23	7.27	7.18	7.14	7.18	7.17	7.23	7.17	7.24	7.27	7.19	7.23
0iuU7K4H6Pfd5UfVHU	7.26	7.2	7.22	7.27	7.31	7.3	7.31	7.26	7.29	7.25	7.26	7.35	7.22	7.18	7.27	7.31	7.22	7.28	7.19	7.2	7.33	7.23	7.23	7.19	7.2	7.28	7.17	7.28	7.37	7.26	7.24	7.29	7.24	7.3	7.25	7.18	7.2	7.39	7.27	7.26	7.22	7.33	7.23	7.21	7.16	7.22	7.2	7.25	7.33
0iv.utwqM1L53BFN74	7.25	7.13	7.13	7.15	7.12	7.13	7.21	7.15	7.13	7.11	7.15	7.11	7.08	7.17	7.13	7.11	7.15	7.11	7.19	7.19	7.2	7.18	7.17	7.16	7.13	7.12	7.03	7.17	7.19	7.14	7.16	7.15	7.08	7.19	7.16	7.14	7.12	7.19	7.15	7.15	7.11	7.14	7.15	7.15	7.16	7.21	7.19	7.16	7.12
0iV1xNb5NCVBhKAgVI	7.26	7.18	7.16	7.15	7.17	7.16	7.11	7.2	7.11	7.12	7.19	7.15	7.17	7.24	7.18	7.16	7.27	7.22	7.24	7.18	7.21	7.18	7.23	7.15	7.23	7.19	7.2	7.11	7.2	7.19	7.17	7.12	7.16	7.22	7.18	7.18	7.13	7.22	7.24	7.37	7.17	7.13	7.15	7.12	7.21	7.38	7.46	7.24	7.18
0IVAtI4TSsAOSntfKo	8.26	8.16	8.26	8.31	8.27	8.49	8.34	8.38	8.35	8.08	8.16	8.14	8.36	8.15	7.99	8.07	8.15	8.24	8.48	8.57	8.23	8.34	8.53	8.46	8.36	8.32	8.32	8.46	8.38	8.26	8.41	8.27	8.64	8.21	8.39	8.45	8.45	8.32	8.35	8.23	8.32	8.28	8.17	8.26	8.1	8.34	8.46	8.22	7.94
0iVCBHrpQKOu37gKKk	7.28	7.28	7.25	7.27	7.26	7.27	7.26	7.26	7.27	7.21	7.26	7.19	7.25	7.34	7.34	7.27	7.22	7.25	7.35	7.3	7.28	7.24	7.4	7.18	7.26	7.16	7.19	7.26	7.21	7.22	7.32	7.2	7.23	7.26	7.22	7.21	7.24	7.29	7.21	7.18	7.27	7.23	7.24	7.36	7.26	7.31	7.3	7.33	7.23
0ivwgT0epI749bk5UU	7.61	7.6	7.83	7.48	7.88	8.24	7.79	7.98	7.87	7.93	7.58	7.78	7.66	8.38	8.06	7.6	7.63	7.59	8.19	7.88	7.6	7.68	7.81	7.36	7.77	8.09	7.73	7.95	7.47	7.73	7.7	8.13	7.68	7.87	7.72	8.08	7.65	7.76	7.87	7.77	7.83	7.91	7.98	7.85	7.64	8.04	8.48	7.67	7.68
0iw2tJECiUNWJZughc	7.08	7.19	7.21	7.19	7.15	7.21	7.28	7.22	7.21	7.2	7.26	7.2	7.17	7.23	7.2	7.16	7.23	7.18	7.18	7.19	7.2	7.21	7.25	7.22	7.23	7.21	7.15	7.22	7.24	7.17	7.17	7.14	7.22	7.16	7.2	7.27	7.22	7.2	7.15	7.21	7.16	7.22	7.26	7.2	7.17	7.25	7.21	7.18	7.25
0iWqWFZRzWSSXaUopg	7.47	7.41	7.39	7.26	7.34	7.5	7.44	7.78	7.54	7.35	7.47	7.33	7.61	7.31	7.44	7.31	7.43	7.32	7.5	7.87	7.48	7.21	7.86	7.18	7.83	7.46	7.26	7.44	7.25	7.5	7.52	7.58	7.5	7.31	7.44	7.77	7.41	7.47	7.45	7.62	7.45	7.39	7.33	7.4	7.3	7.42	7.46	8.03	7.36
0IXbfXeyH_CKAfXH1I	7.2	7.12	7.15	7.16	7.2	7.29	7.18	7.18	7.17	7.16	7.24	7.12	7.19	7.16	7.2	7.11	7.18	7.24	7.14	7.18	7.18	7.09	7.15	7.1	7.16	7.11	7.19	7.19	7.14	7.22	7.19	7.16	7.18	7.15	7.19	7.13	7.18	7.31	7.15	7.18	7.26	7.15	7.13	7.23	7.18	7.13	7.12	7.19	7.17
0ixEgp.oyAy9OV1KhI	7.25	7.29	7.22	7.43	7.49	7.38	7.22	7.17	7.29	7.24	7.24	7.21	7.29	7.33	7.36	7.36	7.26	7.21	7.24	7.19	7.21	7.23	7.22	7.36	7.21	7.25	7.33	7.32	7.25	7.35	7.34	7.22	7.27	7.29	7.24	7.18	7.25	7.61	7.25	7.31	7.35	8.01	7.32	7.4	7.25	7.24	7.2	7.33	7.31
0izYHmejgkQnoOCPlI	7.2	7.23	7.2	7.21	7.26	7.21	7.3	7.27	7.24	7.23	7.17	7.18	7.14	7.24	7.24	7.22	7.19	7.15	7.21	7.21	7.36	7.28	7.28	7.35	7.25	7.27	7.26	7.29	7.36	7.28	7.2	7.24	7.27	7.26	7.26	7.24	7.13	7.33	7.29	7.32	7.3	7.25	7.26	7.28	7.24	7.22	7.23	7.26	7.36
0J.eRVS6TddNG97ltc	8.44	8.57	9.01	8.43	8.66	8.84	8.35	8.67	8.55	8.29	8.62	8.92	8.66	8.61	8.54	9.13	9.39	9.1	9.01	9.33	8.94	8.99	9.05	8.87	9.85	8.59	8.95	9.35	9.57	8.88	9.59	10.15	8.81	9.11	8.81	8.88	9.38	8.79	8.61	9.42	8.67	8.63	8.19	8.06	8.58	9.69	8.44	8.75	9.09
0J0eqnZ6oXXfP5R.9U	7.41	7.36	7.39	7.48	7.44	7.33	7.29	7.42	7.39	7.48	7.37	7.24	7.27	7.32	7.24	7.28	7.34	7.45	7.42	7.29	7.36	7.32	7.27	7.66	7.31	7.43	7.36	7.37	7.37	7.35	7.44	7.4	7.44	7.44	7.32	7.4	7.36	7.4	7.37	7.31	7.43	7.4	7.33	7.41	7.34	7.28	7.39	7.34	7.29
0j0lfsIIaX6OeVdhXc	7.56	7.68	7.74	7.54	7.62	7.78	7.7	7.61	7.64	7.71	7.57	7.66	7.88	7.7	7.6	7.6	7.72	7.65	7.6	7.72	7.47	7.65	7.51	7.75	7.66	7.59	7.68	7.73	7.66	7.62	7.71	7.76	7.59	7.59	7.67	7.55	7.6	7.75	7.56	7.7	7.66	7.56	7.62	7.66	7.54	7.62	7.62	7.67	7.84
0j14cFXd8icSYnk8Uk	10.09	10.72	10.2	10.79	10.66	10.18	10.95	10.88	10.46	10.16	9.49	10.98	10.04	10.01	10.08	10.44	11.29	9.7	11.13	10.55	10.79	11.42	11.78	11.46	10.83	10.59	11.15	10.93	11.7	10.51	11.04	10.25	11.28	10.83	10.19	11.62	11.33	10.58	11.74	10.84	11.39	10.62	9.72	12.56	9.72	11.75	11.98	10.95	10.82
0J16oq9O7S0r3dQm1c	7.37	7.25	7.34	7.32	7.29	7.33	7.27	7.33	7.29	7.34	7.3	7.31	7.26	7.27	7.32	7.26	7.3	7.23	7.24	7.25	7.35	7.24	7.2	7.24	7.2	7.33	7.35	7.35	7.45	7.34	7.36	7.36	7.27	7.34	7.24	7.43	7.32	7.32	7.26	7.37	7.39	7.31	7.24	7.34	7.36	7.28	7.21	7.28	7.31
0J2QVFKRLdAIOe1UQo	7.3	7.31	7.23	7.34	7.31	7.26	7.29	7.26	7.3	7.39	7.3	7.41	7.25	7.37	7.31	7.36	7.34	7.43	7.21	7.44	7.24	7.21	7.19	7.51	7.19	7.24	7.32	7.28	7.27	7.31	7.27	7.25	7.21	7.22	7.23	7.35	7.27	7.32	7.28	7.33	7.28	7.21	7.22	7.25	7.31	7.33	7.24	7.28	7.28
0J3RdiEXVIVRNV0gZ4	8.16	7.74	7.87	8.16	7.71	7.9	7.89	7.84	7.87	8.04	7.56	8	8.1	8.05	8.38	7.78	7.7	7.99	8.19	8.06	7.89	7.81	7.76	8.1	7.7	7.74	7.77	7.73	7.74	7.75	7.53	8.09	7.93	8.2	7.61	7.74	7.57	7.77	7.62	8	8.25	7.5	8.05	7.62	8.09	7.86	7.94	7.58	7.63
0J3Uq0XTpENIeJ7Hwo	7.1	7.12	7.16	7.15	7.19	7.16	7.22	7.17	7.14	7.16	7.12	7.16	7.17	7.08	7.12	7.08	7.14	7.08	7.15	7.17	7.17	7.11	7.15	7.09	7.12	7.09	7.16	7.17	7.1	7.15	7.13	7.11	7.07	7.15	7.15	7.1	7.13	7.06	7.08	7.14	7.1	7.12	7.1	7.19	7.11	7.06	7.13	7.12	7.15
0j4VNK79Ma8_qe5TaQ	10.97	10.98	10.29	11.39	10.98	10.3	10.64	11.45	10.41	11.07	11.39	11.16	10.55	11.44	11.16	11.02	10.8	10.36	11.65	12.08	11.51	11.13	11.49	11.73	11.27	11.6	11.5	11.9	11.38	11	11.45	12.2	11.92	11.29	12.11	11.75	11.35	11.65	11.52	11.1	11.63	10.78	10.68	11.5	10.97	11.87	11.54	11.68	12.01
0J51TfnoP36mn3UXs0	7.4	7.49	7.23	7.45	7.49	7.37	7.39	7.37	7.34	7.41	7.37	7.46	7.32	7.48	7.27	7.39	7.33	8.59	7.24	7.22	7.24	7.2	7.32	7.18	7.24	7.32	7.29	8.18	7.23	7.54	7.22	7.21	7.62	7.14	7.43	7.23	7.44	7.19	7.23	7.22	7.19	7.34	7.47	7.41	7.62	7.2	7.22	7.38	7.36
0J53x7JOuXTsBUR6Jg	8.7	8.66	9.41	8.55	9.17	10.53	8.93	9.82	9.22	9.36	8.51	9.09	8.93	9.69	9.66	8.36	8.77	8.52	10.91	9.41	9.55	8.58	9.12	8.99	9.31	10.08	9.68	9.47	9.11	9.33	9.4	9.64	9.57	9.32	9.62	9.28	9.59	9.61	9.53	9.25	10.14	9.58	9.6	9.65	8.78	9.56	10.85	9.22	8.82
0J67pJCtSDSeSAilQo	7.22	7.31	7.21	7.2	7.23	7.24	7.25	7.29	7.17	7.19	7.16	7.16	7.28	7.2	7.26	7.22	7.2	7.23	7.18	7.18	7.17	7.18	7.13	7.18	7.19	7.23	7.12	7.28	7.15	7.24	7.24	7.19	7.25	7.26	7.21	7.18	7.21	7.25	7.19	7.19	7.2	7.18	7.27	7.27	7.33	7.16	7.14	7.21	7.38
0J6bK6S_peuKvKH0gE	10.06	10.04	10.6	10.48	10.58	9.13	10	10.37	10.41	9.48	9.56	10.82	9.72	9.7	10.46	10.11	11.23	10.24	10.68	10.44	11.01	10.93	10.96	10.59	10.87	11.03	9.75	11	10.11	10.67	10.93	11.53	10.57	10.35	10.24	10.73	9.76	10.3	10.94	10.85	10.1	9.99	9.88	9.89	10.46	10.37	10.42	10.75	10.08
0J6QgpEqKgd0AFBBc4	7.22	7.13	7.14	7.23	7.2	7.18	7.24	7.21	7.17	7.21	7.21	7.27	7.21	7.14	7.17	7.17	7.17	7.2	7.18	7.19	7.23	7.17	7.19	7.15	7.2	7.16	7.17	7.21	7.17	7.23	7.26	7.2	7.21	7.22	7.15	7.19	7.13	7.27	7.27	7.18	7.19	7.15	7.18	7.15	7.09	7.2	7.15	7.15	7.21
0J7c1Da1l1vSJL25RI	7.21	7.18	7.16	7.26	7.25	7.27	7.29	7.2	7.19	7.16	7.2	7.27	7.22	7.23	7.2	7.21	7.2	7.21	7.29	7.3	7.29	7.25	7.27	7.18	7.34	7.2	7.26	7.2	7.27	7.27	7.21	7.24	7.22	7.18	7.22	7.26	7.23	7.26	7.17	7.24	7.21	7.19	7.21	7.27	7.29	7.25	7.24	7.28	7.2
0J7ikue7r15bWh3.10	9.63	11.92	10.08	7.23	7.35	7.33	7.32	7.39	8.36	8.26	7.38	7.29	7.25	7.27	7.33	7.34	7.28	7.29	7.27	8.05	8.08	7.21	14.44	7.62	7.38	15.02	7.34	7.37	7.86	11.53	13.84	9.29	7.36	7.29	7.53	8.17	11.94	7.28	13.65	7.4	9.6	9.6	7.47	10.66	7.61	11.32	7.75	10.92	12.22
0J7iOl6SBWd_hVEg4g	7.2	7.19	7.21	7.2	7.29	7.2	7.27	7.48	7.14	7.05	7.21	7.27	7.28	7.21	7.32	7.18	7.2	8.3	7.18	7.18	7.22	7.19	7.1	7.15	7.2	7.36	7.15	7.29	7.16	7.5	7.54	7.23	7.14	7.18	7.17	7.16	7.14	7.26	7.34	7.2	7.44	7.37	7.16	7.16	7.33	7.21	7.16	7.24	7.13
0J83lPeOf1UFKHkF0o	7.21	7.19	7.21	7.2	7.23	7.2	7.23	7.17	7.24	7.15	7.2	7.19	7.21	7.18	7.11	7.18	7.21	7.2	7.22	7.24	7.26	7.29	7.2	7.33	7.27	7.25	7.15	7.19	7.22	7.23	7.15	7.16	7.24	7.22	7.16	7.25	7.2	7.16	7.2	7.21	7.19	7.25	7.15	7.2	7.21	7.29	7.26	7.23	7.12
0j8o3uuSpDv0C.LRJ8	7.29	7.36	7.19	7.29	7.3	7.36	7.22	7.25	7.24	8.2	7.19	7.6	7.27	7.34	7.94	7.31	7.31	7.28	7.28	7.18	7.21	7.17	7.2	7.18	7.21	7.17	7.42	7.22	7.19	7.22	7.27	7.83	7.26	7.24	7.31	7.35	7.46	7.18	7.26	7.2	7.6	7.52	7.32	7.37	7.34	7.26	7.25	7.37	7.61
0j91d0WKdBJJCehM90	7.03	7.16	7.08	7.11	7.15	7.11	7.12	7.14	7.1	7.09	7.12	7.18	6.98	7.11	7.12	7.12	7.1	7.22	7.15	7.16	7.18	7.12	7.13	7.04	7.11	7.17	7.09	7.07	7.17	7.15	7.11	7.09	7.09	7.11	7.07	7.21	7.1	7.15	7.12	7.1	7.12	7.15	7.1	7.1	7.12	7.12	7.15	7.08	7.05
0J_0d5bfSbsX4AlGYo	7.21	7.15	7.14	7.06	7.09	7.14	7.1	7.17	7.17	7.1	7.16	7.17	7.13	7.09	7.2	7.15	7.18	7.12	7.13	7.17	7.19	7.14	7.11	7.1	7.13	7.1	7.2	7.14	7.15	7.15	7.14	7.12	7.09	7.16	7.2	7.15	7.1	7.11	7.14	7.12	7.17	7.17	7.09	7.06	7.28	7.11	7.13	7.17	7.11
0j_iXqv2oK74oNzILU	8.03	7.48	8.57	7.52	7.78	7.91	7.9	8.14	8.33	8.36	8.11	8.4	8.4	8.18	8	7.97	7.71	7.7	7.78	8.83	7.84	7.82	7.24	7.18	7.19	8.33	8.22	7.99	8.01	7.87	7.51	9.47	8.22	8.15	8.66	8.53	7.77	8.48	8.25	8.22	8.08	8.06	8.14	8.14	7.61	8.15	9.34	8.08	7.93
0JaFZdZNq_Y5XeTL98	7.16	7.2	7.39	7.15	7.19	7.08	7.2	7.18	7.13	7.15	7.16	7.19	7.13	7.11	7.2	7.13	7.15	7.16	7.2	7.2	7.23	7.2	7.19	7.57	7.22	7.18	7.14	7.16	7.33	7.16	7.15	7.15	7.2	7.23	7.17	7.22	7.15	7.13	7.11	7.15	7.22	7.16	7.15	7.15	7.15	7.23	7.19	7.18	7.14
0jAjDVneDlSnld1QnY	8.15	8.1	8.5	8.55	9.11	8.29	7.77	8.35	8.24	8.7	8.1	9.15	8.24	8.61	7.88	7.83	8.09	7.93	9.2	8.48	8.58	8.11	8.42	8.42	8.34	9.34	7.74	9.06	8.62	8.48	8.78	9.42	8.82	8.13	7.78	8.09	8.19	8.03	8.24	8.6	8.5	7.89	8.19	8.15	8.34	8.83	8.46	8.45	8.54
0JAQA5AgA5CzqLrloo	7.24	7.28	7.26	7.29	7.32	7.28	7.31	7.32	7.3	7.26	7.31	7.23	7.3	7.32	7.24	7.36	7.29	7.26	7.16	7.17	7.2	7.09	7.09	7.15	7.14	7.24	7.36	7.27	7.16	7.27	7.32	7.2	7.24	7.17	7.23	7.15	7.29	7.29	7.27	7.23	7.31	7.32	7.22	7.32	7.33	7.16	7.15	7.31	7.28
0JBIKJ3uvUEJ66RR6g	7.12	7.16	7.19	7.24	7.11	7.18	7.18	7.21	7.15	7.08	7.17	7.24	7.16	7.27	7.21	7.16	7.22	7.18	7.44	7.18	7.22	7.22	7.27	7.21	7.22	7.27	7.2	7.23	7.29	7.23	7.31	7.29	7.34	7.26	7.16	7.24	7.22	7.26	7.38	7.31	7.29	7.21	7.13	7.25	7.15	7.3	7.29	7.21	7.23
0JC5EWRK52iD0l1A1k	7.16	7.2	7.22	7.21	7.25	7.27	7.11	7.14	7.18	7.2	7.22	7.26	7.13	7.31	7.33	7.19	7.24	7.21	7.18	7.36	7.29	7.19	7.21	7.2	7.2	7.22	7.17	7.19	7.25	7.23	7.22	7.28	7.27	7.3	7.26	7.18	7.17	7.23	7.24	7.32	7.23	7.18	7.27	7.22	7.22	7.23	7.17	7.23	7.31
0JDV3uvSgFClIBV5X0	7.13	7.15	7.14	7.1	7.26	7.19	7.14	7.1	7.15	7.22	7.18	7.21	7.14	7.18	7.13	7.19	7.17	7.13	7.16	7.16	7.19	7.19	7.18	7.14	7.15	7.07	7.13	7.11	7.23	7.04	7.11	7.15	7.13	7.17	7.09	7.2	7.16	7.08	7.14	7.11	7.09	7.14	7.15	7.08	7.1	7.15	7.15	7.17	7.13
0jE0JN9PM76s7Qpc6U	7.09	7.15	7.17	7.14	7.18	7.17	7.11	7.12	7.13	7.09	7.16	7.12	7.11	7.1	7.12	7.08	7.11	7.11	7.17	7.16	7.17	7.14	7.19	7.14	7.16	7.17	7.13	7.12	7.15	7.15	7.17	7.15	7.18	7.15	7.12	7.1	7.12	7.13	7.1	7.16	7.14	7.05	7.05	7.14	7.12	7.09	7.15	7.18	7.05
0Je9NYkuakxBriB6IE	9.4	10.38	10.64	9.33	10.7	11.08	11	10.74	10.63	10.67	10.16	10.21	10.98	9.61	10.45	9.58	10.7	9.25	11.55	11.45	10.1	9.3	11.17	9.71	9.8	10.73	11	10.8	11.07	10.84	10.67	11.42	10.16	9.77	10.56	11.27	10.79	10.53	10.83	10.94	11.09	10.2	10.71	9.96	9.26	10.81	11.7	10.78	10.39
0jE9PHRienlikkoBes	7.2	7.18	7.11	7.2	7.17	7.19	7.22	7.24	7.2	7.2	7.17	7.22	7.23	7.18	7.18	7.14	7.23	7.14	7.22	7.28	7.23	7.18	7.25	7.17	7.2	7.19	7.16	7.17	7.2	7.19	7.21	7.24	7.17	7.29	7.19	7.24	7.17	7.21	7.15	7.18	7.19	7.2	7.23	7.2	7.19	7.21	7.34	7.19	7.18
0JeaRX5X_5TfRS9fW8	7.24	7.12	7.22	7.18	7.17	7.2	7.15	7.15	7.22	7.21	7.21	7.21	7.23	7.18	7.19	7.24	7.23	7.25	7.2	7.17	7.2	7.19	7.23	7.47	7.2	7.15	7.13	7.2	7.23	7.16	7.14	7.15	7.13	7.12	7.15	7.18	7.14	7.2	7.11	7.1	7.14	7.18	7.34	7.26	7.2	7.19	7.21	7.15	7.09
0jEDugN4HeTiAhFO4I	7.28	7.28	7.24	7.33	7.29	7.26	7.3	7.28	7.27	7.26	7.27	7.27	7.24	7.32	7.27	7.25	7.3	7.25	7.26	7.22	7.26	7.26	7.26	7.28	7.33	7.36	7.33	7.24	7.28	7.24	7.31	7.32	7.36	7.27	7.25	7.26	7.34	7.43	7.33	7.29	7.31	7.29	7.38	7.29	7.31	7.22	7.29	7.28	7.49
0jEOj.qh8qgKOSqOKg	7.47	7.42	7.35	7.34	7.43	7.42	7.38	7.46	7.5	7.33	7.31	7.4	7.35	7.39	7.36	7.37	7.41	7.35	7.44	7.23	7.27	7.22	7.2	7.43	7.43	7.47	7.36	7.5	7.28	7.47	7.49	7.35	7.45	7.46	7.38	7.36	7.4	7.39	7.41	7.37	7.42	7.4	7.34	7.34	7.4	7.37	7.42	7.41	7.39
0JfsIVL57nUX0xfZc4	7.21	7.15	7.15	7.16	7.15	7.21	7.25	7.21	7.12	7.26	7.43	7.13	7.18	7.13	7.17	7.21	7.18	7.18	7.19	7.2	7.19	7.2	7.2	7.18	7.19	7.52	7.15	7.18	7.14	7.5	7.14	7.17	7.13	7.22	7.19	7.23	7.2	7.14	7.12	7.19	7.18	7.21	7.14	7.23	7.14	7.16	7.13	7.12	7.11
0jfUm3uB0c1ULXr4xs	7.2	8.08	7.13	7.15	7.13	7.15	7.15	7.09	7.18	7.11	7.16	7.16	7.12	7.08	7.14	7.14	7.14	7.15	7.21	7.18	7.21	7.18	7.2	7.16	7.2	7.19	7.18	7.15	7.14	7.64	7.18	7.17	7.12	7.22	7.15	7.15	7.14	7.16	7.22	7.15	7.17	7.49	7.16	7.12	7.12	7.74	7.19	7.18	7.15
0JgYbhf9fTfej3S7h4	7.19	7.25	7.16	7.26	7.2	7.25	7.24	7.26	7.25	7.19	7.31	7.17	7.21	7.19	7.27	7.26	7.22	7.25	7.32	7.31	7.24	7.21	7.57	7.46	7.27	7.27	7.26	7.25	7.26	7.28	7.26	7.26	7.24	7.2	7.3	7.25	7.16	7.25	7.3	7.29	7.22	7.23	7.26	7.25	7.28	7.28	7.21	7.25	7.24
0jhCrSdKo7qoqa.zfU	8.34	8.4	8.28	8.22	8.47	8.4	8.3	7.95	8.14	8.25	8.33	8.25	8.17	8.3	8.2	8.15	8.3	8.32	8.08	8.01	8.18	8.3	8.09	8.49	8.07	8.65	7.95	8.48	7.74	8.74	8.49	8.3	8.54	8.25	8.09	8.19	8.21	8.23	8.11	8.27	8.43	8.59	9	8.69	8.63	7.98	8.01	8.4	8.1
0JHlYyBGVldHnvfl8Q	10.16	9.17	9.73	9.32	11.31	11.1	10.93	11.4	11.12	10.15	9.47	10.75	10.79	10.79	11.35	9.92	10.19	9.33	11.52	10.84	11.36	10.23	10.54	10.13	10.76	10.98	9.89	10.74	10.79	10.99	11.25	11.64	10.2	10.79	10.47	10.13	10.04	11.26	10.6	11.42	11.06	11.15	9.35	9.98	10.52	9.72	9.44	10.99	9.46
0Ji48nrk1UXm1.kyU4	7.2	7.22	7.14	7.16	7.16	7.19	7.17	7.16	7.23	7.21	7.17	7.28	7.12	7.14	7.19	7.17	7.12	7.16	7.18	7.18	7.2	7.19	7.17	7.16	7.19	7.18	7.12	7.22	7.17	7.2	7.11	7.19	7.18	7.26	7.15	7.2	7.19	7.15	7.16	7.19	7.21	7.18	7.24	7.12	7.14	7.18	7.18	7.16	7.15
0jigz3BX15zvY0jMgg	7.22	7.31	7.24	7.28	7.21	7.23	7.18	7.19	7.22	7.24	7.25	7.25	7.23	7.33	7.26	7.27	7.26	7.2	7.21	7.19	7.31	7.21	7.25	7.37	7.26	7.25	7.25	7.25	7.29	7.2	7.33	7.22	7.23	7.33	7.17	7.41	7.27	7.26	7.28	7.32	7.23	7.28	7.28	7.4	7.3	7.27	7.27	7.24	7.31
0JK6uKgQRV3fcjVKfc	7.22	7.19	7.17	7.2	7.18	7.22	7.23	7.17	7.23	7.17	7.18	7.22	7.15	7.18	7.26	7.15	7.22	7.23	7.21	7.17	7.19	7.15	7.17	7.16	7.17	7.23	7.21	7.23	7.15	7.19	7.31	7.24	7.23	7.16	7.17	7.19	7.22	7.2	7.24	7.21	7.24	7.15	7.17	7.24	7.18	7.19	7.15	7.24	7.18
0JKeqmnnvi3v.HtyeU	10.24	10	9.84	9.93	9.95	10.19	9.83	9.54	10.24	10.63	9.84	11.21	9.65	9.57	9.82	10.98	10.33	8.69	9.95	10.51	9.38	8.68	9.54	9.92	8.91	10.17	9.96	10.05	9.81	9.91	9.79	10.36	9.82	9.29	10.26	10.05	10.2	9.79	10.18	9.19	9.92	10.69	10.39	10.38	10.03	9.61	9.71	10.07	10.59
0JKiSKIvUqFIJSguo8	7.33	7.18	7.12	7.25	7.17	7.25	7.24	7.23	7.18	7.23	7.19	7.27	7.23	7.18	7.18	7.22	7.26	7.21	7.16	7.16	7.16	7.1	7.14	7.14	7.14	7.21	7.26	7.13	7.12	7.2	7.29	7.23	7.19	7.13	7.3	7.13	7.24	7.33	7.26	7.2	7.2	7.2	7.28	7.18	7.28	7.11	7.13	7.23	7.3
0jKIT.nzv8Kzs_rIok	7.19	7.15	7.18	7.18	7.23	7.23	7.18	7.22	7.21	7.17	7.24	7.19	7.2	7.23	7.17	7.22	7.22	7.2	7.25	7.19	7.24	7.23	7.2	7.3	7.3	7.18	7.18	7.12	7.2	7.15	7.17	7.16	7.21	7.23	7.21	7.22	7.17	7.17	7.21	7.2	7.19	7.13	7.13	7.25	7.17	7.16	7.21	7.2	7.15
0JKIyCgRKopKIkKe_U	7.33	7.3	7.27	7.26	7.27	7.17	7.34	7.34	7.33	7.39	7.28	7.27	7.26	7.31	7.26	7.31	7.31	7.39	7.24	7.23	7.25	7.2	7.2	7.25	7.25	7.24	7.27	7.32	7.23	7.28	7.26	7.3	7.29	7.27	7.38	7.27	7.36	7.3	7.27	7.3	7.39	7.33	7.27	7.45	7.41	7.31	7.18	7.29	7.28
0jKUlmTSHuBVGCiVPs	7.64	7.55	7.74	7.48	7.64	7.74	8.04	7.83	7.46	7.5	7.6	7.58	7.85	7.53	7.54	7.54	7.6	10.74	7.68	7.48	7.89	7.95	8.07	7.79	7.8	7.52	7.55	7.54	7.86	7.53	7.49	7.67	7.45	7.59	7.5	7.69	7.56	7.52	7.5	7.65	7.59	7.48	7.64	7.48	7.61	7.54	7.6	7.68	7.69
0jKVfXiX67V6DigI90	9.33	9.22	9.38	9.55	9.36	9.47	9.33	8.75	8.88	9.56	9.39	8.98	8.91	8.99	9.26	9.27	9.2	9.69	9.59	9.33	9.43	9.22	9.1	9.6	9.66	8.73	9.25	9.59	9.46	9.05	9.29	9.53	9.33	9.64	9.22	9.43	9.28	9.23	9.56	9.43	9.79	8.78	8.74	9.27	8.91	9.27	9.19	9.18	9.42
0jkysf.eU4P5PSh0qI	7.26	7.42	7.25	7.45	7.25	7.24	7.31	7.2	7.37	7.32	7.53	7.4	7.36	7.38	7.37	7.6	7.3	7.39	7.21	7.19	7.22	7.2	7.2	7.16	7.19	7.14	7.2	7.19	7.18	7.17	7.2	7.26	7.21	7.11	7.43	7.28	7.29	7.3	7.34	7.16	7.27	7.31	7.56	7.6	7.57	7.2	7.19	7.26	7.39
0jl3EF.uAC1IAX1AS4	7.18	7.16	7.13	7.16	7.17	7.19	7.12	7.17	7.12	7.15	7.19	7.18	7.18	7.2	7.18	7.13	7.17	7.16	7.16	7.17	7.2	7.18	7.21	7.17	7.19	7.13	7.17	7.17	7.18	7.14	7.22	7.17	7.16	7.17	7.21	7.22	7.21	7.12	7.21	7.23	7.18	7.16	7.15	7.13	7.18	7.22	7.22	7.17	7.17
0jlCAiUpli59R92e5c	7.43	7.35	7.43	7.25	7.24	7.52	7.35	7.6	7.31	7.24	7.18	7.22	7.16	7.38	7.26	7.37	7.28	7.23	7.71	7.59	7.46	7.35	7.42	7.59	7.51	7.37	7.33	7.38	7.28	7.3	7.52	7.47	7.31	7.74	7.41	7.43	7.3	7.51	7.34	7.32	7.35	7.25	7.25	7.4	7.31	7.35	7.45	7.45	7.34
0jlINB4VHlD9Igh4IA	7.16	7.21	7.13	7.14	7.18	7.12	7.22	7.18	7.15	7.15	7.21	7.19	7.19	7.13	7.18	7.19	7.15	7.19	7.18	7.23	7.19	7.28	7.18	7.2	7.17	7.19	7.24	7.14	7.18	7.13	7.12	7.24	7.24	7.18	7.16	7.2	7.19	7.14	7.22	7.12	7.2	7.17	7.18	7.2	7.09	7.18	7.14	7.13	7.19
0jnB4rBSyerwUKwUeI	7.06	7.18	7.23	7.12	7.14	7.33	7.27	7.21	7.26	7.45	7.06	7.05	7.25	7.18	7.27	7.3	7.13	7.15	7.12	7.17	7.18	7.17	7.14	7.12	7.1	7.14	7.19	7.09	7.12	7.21	7.18	7.14	7.1	7.12	8.8	7.1	7.15	7.13	7.23	7.13	7.16	7.37	7.43	7.09	7.77	7.1	7.15	7.19	7.06
0JndiixHCCdBFS4plY	7.66	7.41	7.83	7.59	7.65	7.41	7.62	7.36	7.82	7.33	7.46	8.16	7.43	7.77	7.92	7.73	7.77	7.25	7.69	8.11	7.91	8.04	7.49	7.95	7.92	7.9	7.44	7.44	7.5	7.52	7.77	8.08	7.35	7.45	7.5	7.3	7.39	7.77	7.41	7.4	7.58	7.62	7.46	7.47	7.68	7.34	7.89	7.63	7.56
0jnN8e4o96nxJPb9SQ	7.21	7.2	7.12	7.14	7.14	7.17	7.28	7.2	7.18	7.16	7.24	7.25	7.18	7.27	7.16	7.14	7.19	7.14	7.18	7.19	7.22	7.2	7.2	7.37	7.21	7.19	7.18	7.22	7.2	7.19	7.16	7.23	7.19	7.17	7.17	7.17	7.15	7.17	7.14	7.19	7.27	7.17	7.17	7.17	7.16	7.23	7.21	7.19	7.22
0joAiAanrqiioIkiFI	7.31	7.36	7.32	7.29	7.32	7.32	7.26	7.26	7.29	7.28	7.33	7.24	7.25	7.32	7.29	7.38	7.37	7.38	7.58	7.46	7.49	7.53	7.61	7.68	7.55	7.37	7.32	7.35	7.5	7.28	7.3	7.34	7.39	7.44	7.24	7.5	7.34	7.31	7.35	7.41	7.26	7.34	7.29	7.25	7.32	7.45	7.45	7.32	7.39
0JooENQbQXdQPWijUk	7.07	7.1	7.12	7.1	7.06	7.06	8.82	7.33	7.27	7.04	7.13	7.43	7.13	7.06	7.15	7.24	8.98	7.08	7.15	7.17	7.17	7.06	7.13	7.18	7.14	7.1	7.16	7.05	7.15	7.13	7.1	7.07	7.08	7.14	7.51	7.1	7.07	7.08	7.09	7.16	7.11	8.44	8.01	7.12	7.12	8.31	7.16	7.73	7.1
0joRR0.rXnudRV0Sgo	7.2	7.24	7.36	7.25	7.36	7.21	7.19	7.15	7.31	7.27	7.29	7.28	7.27	7.19	7.19	7.3	7.29	7.34	7.22	7.31	7.22	7.2	7.22	7.19	7.19	7.21	7.37	7.24	7.2	7.25	7.22	7.23	7.22	7.2	7.22	7.18	7.24	7.24	7.26	7.26	7.18	7.23	7.26	7.35	7.21	7.2	7.2	7.26	7.17
0jp4kg6SkCHo._qKKk	7.19	7.23	7.21	7.22	7.17	7.17	7.14	7.15	7.22	7.17	7.14	7.12	7.14	7.29	7.12	7.23	7.14	7.16	7.19	7.18	7.19	7.17	7.2	7.19	7.2	7.19	7.12	7.24	7.16	7.16	7.17	7.15	7.27	7.1	7.16	7.16	7.14	7.1	7.16	7.16	7.14	7.11	7.17	7.12	7.19	7.17	7.17	7.19	7.15
0jp5QlFQkYczUOiCCo	7.25	7.29	7.34	7.29	7.24	7.17	7.33	7.22	7.29	7.2	7.21	7.35	7.25	7.37	7.24	7.25	7.26	7.24	7.23	7.18	7.23	7.19	7.24	7.18	7.19	7.25	7.26	7.23	7.26	7.23	7.23	7.26	7.31	7.25	7.19	7.2	7.23	7.23	7.22	7.25	7.29	7.28	7.24	7.27	7.19	7.26	7.18	7.23	7.31
0jp6I4T81KtH_0pXKE	8.08	7.95	8.33	7.45	8.07	8.55	8.83	9.57	7.84	7.5	9.41	9.15	8.07	8.08	8.44	7.8	8.42	8.13	9.42	9.76	8.95	8.53	8.13	8.4	8.62	8.48	8.28	8.29	9.14	8.75	8.55	8.61	8.2	8.76	8.57	8.87	9.11	8.25	9.26	8.84	8.59	8.28	8.37	8.67	7.26	8.85	8.41	8.93	8.68
0JQn_g1fkko1ekBLpQ	7.12	7.16	7.18	7.21	7.14	7.19	7.13	7.12	7.08	7.19	7.1	7.11	7.06	7.13	7.15	7.12	7.11	7.11	7.16	7.18	7.2	7.19	7.17	7.17	7.16	7.12	7.11	7.13	7.19	7.22	7.16	7.17	7.16	7.25	7.1	7.19	7.15	7.13	7.1	7.17	7.12	7.11	7.18	7.11	7.11	7.19	7.15	7.14	7.17
0jqrV7q0D6qiue6iwA	7.36	7.69	7.37	7.42	7.46	7.44	7.28	7.33	7.41	7.41	7.39	7.33	7.36	7.47	7.37	7.39	8.42	7.45	7.36	7.29	7.35	7.2	7.26	7.25	7.21	7.41	7.31	7.39	7.27	7.28	7.51	7.44	7.51	7.41	7.33	7.27	7.29	7.26	7.37	7.4	7.35	7.32	7.34	7.34	7.37	7.28	7.28	7.34	7.34
0JRIRHSKh1KKegbIUs	7.22	7.31	7.33	7.28	7.25	7.31	7.24	7.21	7.24	7.19	7.2	7.2	7.23	7.23	7.27	7.22	7.2	7.34	7.23	7.21	7.25	7.19	7.26	7.2	7.22	7.28	7.17	7.23	7.32	7.25	7.32	7.27	7.29	7.31	7.26	7.29	7.23	7.27	7.3	7.27	7.24	7.23	7.3	7.21	7.15	7.19	7.37	7.26	7.2
0jrjJRlf7eTXpdc52Q	7.23	7.22	7.24	7.24	7.35	7.24	7.18	7.15	7.29	7.33	7.32	7.42	7.2	7.27	7.27	7.33	7.35	7.3	7.18	7.2	7.24	7.19	7.2	7.21	7.19	7.19	7.34	7.17	7.19	7.25	7.13	7.17	7.14	7.19	7.29	7.2	7.24	7.18	7.17	7.22	7.19	7.21	7.25	7.24	7.27	7.2	7.18	7.2	7.2
0JRRKR9K1TQ5aZSI1A	7.23	7.26	7.21	7.19	7.23	7.35	7.27	7.26	7.26	7.33	7.23	7.31	7.26	7.18	7.22	7.28	7.25	7.28	7.32	7.39	7.31	7.21	7.3	7.18	7.21	7.27	7.27	7.24	7.42	7.23	7.26	7.26	7.26	7.25	7.31	7.31	7.24	7.26	7.21	7.27	7.27	7.21	7.34	7.29	7.29	7.36	7.4	7.27	7.25
0JRWFdL_NUgE3RSp_U	7.19	7.18	7.15	7.15	7.16	7.14	7.08	7.16	7.16	7.19	7.16	7.14	7.22	7.15	7.13	7.23	7.18	7.15	7.19	7.19	7.22	7.18	7.19	7.28	7.2	7.19	7.21	7.21	7.22	7.18	7.19	7.16	7.23	7.19	7.17	7.2	7.15	7.14	7.2	7.19	7.13	7.17	7.25	7.13	7.2	7.15	7.16	7.18	7.14
0jT6RfpJ0RN1ut33sk	7.12	7.11	7.11	7.12	7.13	7.22	7.16	7.17	7.11	7.19	7.24	7.18	7.2	7.1	7.2	7.34	7.18	7.17	7.16	7.17	7.19	7.17	7.15	7.13	7.14	7.06	7.25	7.21	7.16	7.16	7.09	7.14	7.17	7.26	7.69	7.2	7.11	7.11	7.13	7.18	7.13	7.47	7.23	7.16	7.23	7.18	7.32	7.15	7.09
0jT_lzBP1SLej9npSQ	7.14	7.24	7.26	7.24	7.24	7.28	7.17	7.12	7.22	7.2	7.22	7.18	7.22	7.27	7.21	7.24	7.2	7.16	7.33	7.2	7.32	7.35	7.29	7.44	7.37	7.21	7.2	7.27	7.24	7.27	7.28	7.16	7.22	7.25	7.19	7.27	7.24	7.23	7.19	7.2	7.25	7.19	7.17	7.19	7.26	7.25	7.22	7.22	7.23
0jtSiGghLJVAJKAfnU	7.09	7.16	7.19	7.14	7.08	7.12	7.1	7.15	7.1	7.13	7.17	7.14	7.11	7.18	7.12	7.09	7.13	7.06	7.19	7.19	7.21	7.15	7.17	7.12	7.19	7.13	7.13	7.17	7.16	7.16	7.13	7.19	7.17	7.16	7.14	7.16	7.1	7.13	7.12	7.19	7.11	7.14	7.14	7.14	7.11	7.15	7.18	7.16	7.17
0jtTiSKgoikSIgKhJY	7.18	7.13	7.11	7.11	7.16	7.13	7.21	8.85	7.13	7.14	7.22	7.31	7.19	7.13	7.17	7.18	7.14	7.16	7.17	7.17	7.18	7.18	7.18	7.17	7.17	7.1	7.02	7.15	7.15	7.18	7.19	7.13	7.12	7.15	7.17	7.22	7.07	7.2	7.13	8.39	7.18	7.16	7.17	7.18	7.17	7.18	7.16	7.19	7.2
0JTV0lGFRiUFQ0hRN8	7.16	7.14	7.17	7.15	7.12	7.16	7.15	7.27	7.13	7.17	7.17	7.2	7.09	7.15	7.26	7.23	7.18	7.2	7.16	7.18	7.19	7.16	7.19	7.17	7.14	7.12	7.09	7.2	7.16	7.19	7.14	7.12	7.15	7.19	7.2	7.15	7.17	7.18	7.13	7.19	7.21	7.17	7.25	7.15	7.22	7.17	7.19	7.12	7.11
0Ju3s.O7iieen5Lmbk	10.68	10.43	10.67	10.88	10.49	9.1	9.9	9.97	9.42	10.15	10.57	10.9	10.13	9.98	10.26	10.59	9.89	10.4	10.04	9.75	10.1	11.61	11.23	10	11.73	10.11	10.66	10.47	11.57	10.55	10.57	10.75	10.91	10.77	10.85	10.81	11.22	10.88	10.91	10.91	10.09	10.83	10.12	10.72	10.46	11.35	10.82	10.6	11.03
0jUFQqQqTXqA5TQugc	12.74	12.01	11.86	12.14	13.19	11.61	12.42	11.81	11.55	11.55	12.28	12.37	12.44	12.58	12.26	12.16	11.89	13.07	12.59	12.52	12.08	12.36	12.53	12.06	12.44	12.72	12.32	12.33	12.92	12.74	12.41	13.12	12.63	12.3	11.49	12.33	12.95	11.89	12.43	12.61	11.88	12.04	11.69	11.73	10.99	12.55	12.64	12.64	12.64
0jufS3smKev3S_pboI	7.14	7.1	7.12	7.1	7.17	7.25	7.23	7.24	7.15	7.2	7.08	7.19	7.21	7.09	7.21	7.13	7.16	7.13	7.13	7.16	7.16	7.1	7.14	7.12	7.16	7.21	7.16	7.14	7.12	7.22	7.14	7.18	7.12	7.14	7.15	7.14	7.14	7.16	7.16	7.14	7.15	7.13	7.2	7.26	7.17	7.15	7.13	7.13	7.16
0jUgnjpUi6TtUlIVdc	7.3	8.47	7.22	7.16	7.27	7.25	7.24	7.21	7.24	8.14	7.24	7.25	7.27	7.25	7.23	7.3	7.22	7.19	7.18	7.22	7.22	7.19	7.2	7.18	7.2	9.5	7.23	7.24	7.19	7.96	7.29	7.26	7.34	7.24	7.26	7.22	7.38	7.31	7.29	7.2	7.19	7.24	7.31	7.22	7.23	7.23	7.19	7.24	7.98
0JUHkqc9Huls0xS50o	7.19	7.12	7.13	7.08	7.19	7.1	7.09	7.1	7.09	7.14	7.12	7.13	7.14	7.05	7.2	7.12	7.11	7.16	7.13	7.17	7.19	7.12	7.15	7.18	7.11	7.2	7.15	7.14	7.12	7.08	7.16	7.15	7.15	7.1	7.2	7.11	7.14	7.2	7.2	7.13	7.13	7.06	7.12	7.11	7.11	7.1	7.12	7.19	7.09
0JUjfPEgq3.IH_TfvU	7.14	7.15	7.15	7.2	7.13	7.15	7.19	7.2	7.11	7.17	7.12	7.12	7.08	7.1	7.14	7.14	7.11	7.12	7.23	7.19	7.22	7.2	7.19	7.17	7.2	7.13	7.13	7.15	7.16	7.2	7.2	7.14	7.16	7.21	7.16	7.16	7.15	7.09	7.16	7.15	7.19	7.16	7.07	7.13	7.17	7.18	7.19	7.19	7.11
0JUZ6I0FUpGZ00IJ4M	9.96	9.36	9.71	9.88	10.52	9.67	9.85	10.15	8.68	9.31	9.8	9.9	9.69	10.83	9.37	9.5	9.72	9.8	10.48	9.56	9.75	9.13	9.93	9.53	9.27	10.4	9	9.87	9.11	9.06	10.15	9.76	9.58	9.73	9.26	9.14	9.09	9.26	9.35	9.96	9.41	9.19	9.4	8.45	9.02	9.3	9.44	9.37	9.2
0jv9cf5KXif3i5biRY	7.16	7.16	7.12	7.2	7.24	7.16	7.21	7.2	7.13	7.18	7.26	7.18	7.15	7.16	7.19	7.21	7.15	7.19	7.21	7.23	7.22	7.21	7.28	7.25	7.26	7.14	7.16	7.12	7.39	7.15	7.19	7.12	7.2	7.1	7.14	7.21	7.19	7.07	7.16	7.15	7.19	7.13	7.2	7.16	7.19	7.31	7.26	7.12	7.16
0jWKp_i7oMKqMQCBKI	7.26	7.25	7.22	7.27	7.29	7.35	7.33	7.23	7.26	7.26	7.29	7.18	7.31	7.26	7.21	7.27	7.29	7.18	7.16	7.16	7.19	7.13	7.12	7.08	7.15	7.32	7.23	7.27	7.14	7.33	7.26	7.34	7.27	7.22	7.28	7.12	7.22	7.2	7.28	7.2	7.29	7.26	7.12	7.16	7.35	7.08	7.09	7.22	7.18
0JwYgqBMypJEQ8Sis4	7.45	7.37	7.37	7.38	7.31	7.46	7.45	7.35	7.34	7.44	7.37	7.34	7.39	7.37	7.38	7.43	7.42	7.29	7.33	7.31	7.4	7.53	7.49	7.35	7.54	7.46	7.42	7.42	7.26	7.48	7.47	7.49	7.46	7.4	7.51	7.37	7.39	7.41	7.39	7.36	7.5	7.36	7.45	7.4	7.45	7.24	7.26	7.47	7.4
0Jx5XEFUdCrh3gIW0k	7.15	7.21	7.15	7.2	7.12	7.17	7.16	7.17	7.18	7.18	7.16	7.18	7.18	7.17	7.2	7.15	7.2	7.23	7.18	7.26	7.23	7.2	7.22	7.18	7.21	7.15	7.17	7.19	7.2	7.21	7.22	7.19	7.21	7.22	7.14	7.23	7.15	7.17	7.12	7.13	7.17	7.11	7.19	7.21	7.1	7.22	7.19	7.16	7.14
0jxFXO6VQCUu4LllyU	7.17	7.17	7.19	7.23	7.22	7.21	7.19	7.16	7.16	7.19	7.17	7.17	7.23	7.15	7.16	7.18	7.16	7.2	7.26	7.23	7.3	7.2	7.19	7.18	7.24	7.15	7.17	7.23	7.22	7.11	7.18	7.21	7.17	7.26	7.15	7.2	7.16	7.13	7.16	7.13	7.18	7.15	7.2	7.23	7.18	7.2	7.24	7.22	7.15
0JY23QpK3frcCQmR.o	7.16	7.16	7.14	7.16	7.2	7.13	7.13	7.16	7.11	7.11	7.2	7.1	7.07	7.22	7.13	7.11	7.13	7.12	7.15	7.22	7.19	7.19	7.17	7.18	7.19	7.16	7.11	7.23	7.24	7.17	7.17	7.16	7.16	7.21	7.15	7.12	7.16	7.22	7.15	7.2	7.17	7.12	7.13	7.18	7.15	7.19	7.21	7.14	7.17
0JyPKPIG4k9C0qSF6k	7.2	7.29	7.25	7.29	7.24	7.24	7.28	7.25	7.24	7.25	7.22	7.25	7.21	7.23	7.27	7.25	7.2	7.23	7.27	7.23	7.27	7.36	7.39	7.4	7.34	7.31	7.29	7.37	7.26	7.29	7.21	7.25	7.15	7.31	7.2	7.33	7.22	7.34	7.25	7.33	7.34	7.25	7.18	7.26	7.33	7.26	7.32	7.26	7.31
0k.d1Qvievw7v_j9XU	7.22	7.22	7.21	7.19	7.26	7.3	7.2	7.28	7.21	7.22	7.33	7.26	7.23	7.45	7.15	7.25	7.24	7.67	7.2	7.19	7.21	7.3	7.19	7.18	7.19	7.17	7.28	7.26	7.21	7.16	7.24	7.21	7.17	7.2	7.18	7.23	7.16	7.34	7.6	7.27	7.25	7.57	7.25	7.44	7.54	7.14	7.21	7.2	7.16
0K.Sf_ozz7xfgA7Rvw	7.11	7.15	7.11	7.12	7.14	7.18	7.12	7.12	7.14	7.12	7.15	7.05	7.13	7.11	7.13	7.11	7.1	7.1	7.15	7.17	7.16	7.14	7.16	7.17	7.14	7.14	7.14	7.12	7.15	7.14	7.15	7.13	7.17	7.11	7.14	7.13	7.15	7.18	7.23	7.15	7.17	7.12	7.16	7.08	7.15	7.12	7.13	7.1	7.16
0K0qtIKBKnkm0q1iK8	7.47	7.41	7.34	7.36	7.34	7.48	7.45	7.43	7.38	7.4	7.3	7.35	7.41	7.43	7.46	7.38	7.38	7.36	7.76	7.55	7.57	7.29	7.36	7.35	7.39	7.53	7.43	7.66	7.29	7.54	7.73	7.48	7.39	7.5	7.42	7.49	7.37	7.4	7.45	7.44	7.55	7.42	7.39	7.36	7.39	7.48	7.38	7.61	7.37
0k1de_ckl.4XN5Dku8	11.55	11.63	11.44	11.93	11.04	11.56	11.52	11.98	12	10.54	11.87	11.52	11.01	11.05	11.55	11.89	11.93	11.75	12.36	12.14	11.89	12.33	12.35	12.36	12.66	11.14	11.94	11.98	12.12	11.26	11.49	11.69	11.5	12.14	12.13	12.1	11.61	11.45	12.13	11.57	12.25	11.34	10.55	12.55	12.95	12.15	12.23	12.15	12.72
0k1TQoiJdo4uen7fgk	7.13	7.15	7.16	7.21	7.13	7.08	7.18	7.18	7.22	7.13	7.16	7.11	7.1	7.17	7.18	7.17	7.14	7.16	7.18	7.18	7.2	7.2	7.18	7.18	7.2	7.08	7.18	7.19	7.2	7.1	7.13	7.21	7.16	7.22	7.23	7.2	7.18	7.17	7.22	7.18	7.18	7.15	7.13	7.16	7.09	7.12	7.12	7.14	7.22
0k3LjKLLuiYgukgRck	7.42	7.68	7.36	7.35	7.45	7.41	7.29	7.37	7.37	7.3	7.28	7.7	7.39	7.31	7.34	7.41	7.36	7.33	7.33	7.33	7.21	7.33	7.26	7.2	7.24	7.29	7.4	7.28	7.2	7.28	7.29	7.27	7.37	7.2	7.58	7.27	7.49	7.32	7.26	7.21	7.25	7.46	7.56	7.86	7.43	7.38	7.52	7.27	7.4
0k3S0qUI8q49C4oQvk	7.12	7.07	7.09	7.07	7.13	7.1	7.12	7.12	7.04	7.18	7.18	7.09	7.19	7.13	7.08	7.12	7.17	7.07	7.13	7.16	7.15	7.13	7.14	7.1	7.12	7.03	7.1	7.09	7.12	7.08	7.09	6.99	7.13	7.06	7.19	7.1	7.19	7.12	7.11	7.02	7.15	7.18	7.12	7.12	7.18	7.12	7.12	7.11	7.07
0k4S0QKoOCQqd5fAKI	7.43	7.42	7.5	7.39	7.41	7.49	7.47	7.45	7.47	7.45	7.5	7.46	7.47	7.5	7.51	7.46	7.51	7.46	7.48	7.71	7.48	7.83	7.53	7.92	7.64	7.42	7.49	7.63	7.55	7.57	7.66	7.56	7.46	7.58	7.39	7.47	7.38	7.49	7.47	7.61	7.55	7.37	7.45	7.43	7.28	7.46	7.39	7.54	7.46
0K5.IUDCkeqTqsqupQ	7.51	7.53	7.62	7.56	7.52	7.67	7.6	7.49	7.52	7.58	7.67	7.52	7.69	7.53	7.56	7.61	7.72	7.66	7.66	7.82	7.68	7.81	7.68	8.14	7.94	7.69	7.67	7.73	7.7	7.68	7.65	7.85	7.65	7.58	7.56	7.69	7.5	7.47	7.65	7.67	7.77	7.55	7.56	7.59	7.59	7.52	7.62	7.68	7.53
0K5ililSp0mChli.Eg	7.08	7.1	7.07	7.1	7.12	7.12	7.06	7.13	7.09	7.14	7.03	7.03	7.03	7.08	7.11	7.09	7.02	7.08	7.11	7.16	7.17	7.1	7.1	7.03	7.11	7.08	7.08	7.18	7.11	7.14	7.11	7.03	7.05	7.2	7.05	7.1	7.12	7.05	7.1	7.08	7.14	7.08	7.01	7.07	7.13	7.08	7.1	7.12	7.08
0K5L9KIqJ6WD5YrSeQ	7.16	7.21	7.2	7.2	7.06	7.29	7.22	7.22	7.18	7.18	7.16	7.17	7.22	7.29	7.23	7.14	7.21	7.15	7.16	7.18	7.22	7.2	7.15	7.13	7.19	7.23	7.18	7.2	7.22	7.23	7.34	7.15	7.18	7.21	7.16	7.13	7.2	7.22	7.2	7.23	7.21	7.24	7.16	7.18	7.12	7.18	7.16	7.19	7.26
0k6AF56K5Kf3SFKX14	7.15	7.21	7.2	7.24	7.37	7.25	7.12	7.27	7.3	7.24	7.16	7.2	7.22	7.25	7.21	7.21	7.21	7.13	7.2	7.27	7.22	7.19	7.27	7.18	7.19	7.15	7.23	7.24	7.24	7.19	7.22	7.17	7.2	7.2	7.24	7.19	7.19	7.26	7.25	7.23	7.16	7.23	7.35	7.23	7.17	7.16	7.21	7.17	7.27
0k6BKnUQoTgxSukqNE	7.34	7.22	7.27	7.29	7.31	7.3	7.26	7.32	7.33	7.24	7.27	7.33	7.31	7.34	7.35	7.28	7.32	7.34	7.27	7.36	7.27	7.34	7.21	7.19	7.35	7.26	7.35	7.27	7.3	7.3	7.39	7.27	7.38	7.58	7.29	7.43	7.3	7.38	7.34	7.31	7.34	7.25	7.31	7.35	7.31	7.39	7.31	7.35	7.34
0k6btP6tn_Ornasgck	9.04	8.48	8.34	10.51	9.94	8.32	9.55	8.66	10.16	8.21	9.39	8.68	9.99	9.11	9.37	9.27	8.5	12.21	8.68	8.82	8.4	9.26	9.19	8.7	9.17	9.59	9.33	8.99	8.56	9.19	8.91	9.29	8.94	9.01	9.75	9.55	9.39	9.84	8.8	9.86	8.71	9.45	8.71	8.13	8.43	8.97	8.93	8.8	8.69
0k6Dnjh_iSlUSFUSKM	7.16	7.12	7.1	7.13	7.13	7.14	7.19	7.66	7.12	7.23	7.15	7.23	7.15	7.09	7.12	7.16	7.15	7.15	7.18	7.17	7.18	7.1	7.13	7.11	7.15	7.14	7.15	7.11	7.14	7.15	7.14	7	7.14	7.07	7.2	7.16	7.16	7.1	7.11	7.11	7.14	7.11	7.16	7.17	7.18	7.13	7.18	7.09	7.14
0K6uKh3ET6gUUAClSk	7.24	7.16	7.24	7.1	7.16	7.22	7.18	7.21	7.2	7.19	7.19	7.2	7.18	7.2	7.17	7.19	7.17	7.19	7.18	7.18	7.18	7.18	7.18	7.16	7.19	7.21	7.15	7.23	7.19	7.22	7.23	7.18	7.17	7.18	7.23	7.17	7.2	7.24	7.15	7.26	7.17	7.16	7.16	7.25	7.23	7.17	7.18	7.22	7.15
0k7eUA5BMagvz9eEko	7.2	7.23	7.25	7.22	7.25	7.22	7.35	7.17	7.19	7.17	7.23	7.24	7.41	7.39	7.72	7.42	7.9	7.19	7.16	7.19	7.19	7.18	7.2	7.19	7.19	7.22	7.51	7.25	7.24	7.25	7.23	7.22	7.25	7.21	7.21	7.18	7.22	7.28	7.31	7.29	7.27	7.54	7.21	7.17	7.77	7.16	7.18	7.21	7.24
0k7ISOCVJ1ZV.xHT0s	7.34	7.23	7.26	7.3	7.31	7.23	7.2	7.19	7.3	7.42	7.26	7.22	7.29	7.29	7.19	7.34	7.22	7.25	7.18	7.19	7.24	7.21	7.2	7.17	7.17	7.22	7.22	7.22	7.41	7.12	7.24	7.15	7.32	7.16	7.33	7.26	7.33	7.21	7.26	7.36	7.19	7.23	7.24	7.29	7.18	7.19	7.19	7.17	7.25
0k7uZulu3uz9xu7Z30	8.42	9.12	8.58	8.99	8.55	8.27	8.41	8.79	8.07	8.31	8.62	8.16	8.35	8.54	8.37	8.07	7.77	8.21	7.74	7.62	8.05	7.7	8.02	7.62	7.75	8.19	8.2	8.06	8.83	8.03	8.2	8.43	8.35	8.44	8.35	8.04	8.27	8.36	8.14	8.58	8.26	8.21	7.86	7.84	8.03	8.39	8.46	8.17	8.87
0k7Y73QcoAS8QwxDm4	7.13	7.16	7.17	7.12	7.15	7.22	7.21	7.15	7.11	7.17	7.18	7.16	7.15	7.19	7.18	7.14	7.15	7.15	7.22	7.19	7.25	7.2	7.18	7.18	7.2	7.13	7.2	7.22	7.24	7.18	7.22	7.14	7.09	7.2	7.16	7.34	7.14	7.09	7.12	7.18	7.17	7.06	7.14	7.16	7.12	7.19	7.24	7.18	7.17
0k95wqCkApfdxO6d0U	7.13	7.16	7.18	7.16	7.11	7.17	7.19	7.17	7.15	7.19	7.19	7.17	7.18	7.12	7.15	7.13	7.17	7.14	7.18	7.19	7.21	7.21	7.23	7.18	7.21	7.17	7.16	7.09	7.16	7.19	7.12	7.13	7.17	7.14	7.09	7.19	7.12	7.15	7.12	7.19	7.16	7.15	7.14	7.15	7.12	7.18	7.19	7.13	7.12
0K9PFF6pIKEqISQU2U	9.05	8.97	8.73	9.19	8.76	9.22	9.13	9.55	8	9.42	8.98	8.84	9.15	9.1	8.42	8.96	8.58	9.45	9.24	9.1	9.22	9.44	9.72	9.37	9.6	9.5	8.68	8.59	9.66	9.53	8.74	8.69	8.54	9.01	8.57	9.54	8.63	8.98	8.98	8.96	9.02	8.43	8.7	8.44	9.13	8.96	9.92	9.48	9.39
0k_6fdLp_Ek316_zuk	10.9	10.84	10.56	10.27	10.81	10.57	10.23	10.02	11.16	10.87	10.17	10.73	9.96	10.67	10.86	11	10.98	10.03	10.69	10.4	10.95	11.23	10.68	11.27	10.76	10.41	10.97	10.52	11.71	10.35	10.44	10.62	10.62	11.11	10.82	11.15	10.85	10.74	11.12	10.79	10.52	10.79	10.36	11.5	10.92	10.9	11.22	10.41	10.65
0k_EFYPo513VIl6OS4	7.18	7.17	7.16	7.15	7.26	7.22	7.31	7.31	7.26	7.28	7.22	7.25	7.22	7.2	7.17	7.21	7.27	7.2	7.17	7.18	7.2	7.17	7.16	7.17	7.16	7.2	7.3	7.17	7.19	7.19	7.29	7.22	7.26	7.15	7.32	7.13	7.24	7.22	7.18	7.25	7.24	7.22	7.18	7.27	7.22	7.18	7.15	7.25	7.24
0k_t.uxEjgskWqSRRQ	7.82	7.68	7.61	7.61	7.62	8.07	7.63	7.53	7.64	7.4	7.41	7.62	7.7	7.52	7.96	7.47	7.87	7.48	8.08	7.65	8.13	7.63	7.31	7.39	7.71	7.48	7.56	7.59	7.8	7.66	7.4	7.51	7.51	7.92	7.56	7.77	7.48	7.6	7.61	7.8	7.71	7.65	7.65	7.62	7.44	7.74	8.8	7.52	7.78
0kA4eSdIKf6cC_EIug	8.83	9.13	9.77	9.59	9.02	7.27	8.61	8.06	9.12	9.85	9.69	9.61	9.15	9.35	9.32	10.06	9.18	8.42	7.28	7.26	7.4	7.23	7.21	7.19	7.2	7.84	8.98	7.56	7.42	7.31	7.43	7.74	7.56	7.33	8.99	7.28	9.24	7.73	7.61	7.36	7.48	8.9	10.6	10.07	10.54	7.35	7.32	7.43	8.51
0kaO8e1519VSVRlcUg	8.86	8.64	9.09	8.88	8.8	8.51	8.25	8.73	9.27	8.6	8.89	9.26	8.74	8.46	8.56	8.89	8.66	8.69	9.38	8.84	8.67	8.73	8.56	8.73	8.67	8.79	8.14	8.82	9.01	8.34	8.73	9.11	8.69	8.89	8.34	8.58	8.33	8.26	8.63	8.92	8.36	8.47	8.54	8.11	8.86	8.86	9.04	8.53	8.54
0kB4KFt5XUy66BUSCo	7.31	7.38	7.38	7.32	8.02	7.63	7.27	7.41	7.36	7.57	7.37	7.41	7.5	7.32	7.3	7.27	7.27	7.3	7.81	7.79	7.37	7.22	8.41	7.72	7.52	8.02	7.59	7.34	7.7	7.64	7.98	7.53	7.68	7.56	7.6	7.79	7.24	7.56	7.46	7.4	7.89	7.39	7.51	7.37	7.16	7.89	7.52	7.53	7.35
0kBCaq_CkqHSiTYugI	7.3	7.28	7.25	7.27	7.21	7.32	7.27	7.31	7.29	7.35	7.23	7.26	7.23	7.24	7.21	7.25	7.3	7.3	7.25	7.21	7.29	7.31	7.26	7.18	7.38	7.27	7.23	7.29	7.26	7.28	7.24	7.29	7.3	7.26	7.3	7.42	7.34	7.2	7.29	7.22	7.22	7.32	7.16	7.3	7.26	7.28	7.24	7.27	7.27
0KbofHPz54OHFBLiJU	7.28	7.25	7.21	7.22	7.28	7.24	7.41	7.79	7.22	7.25	7.63	7.59	7.27	7.54	7.39	7.5	7.32	7.26	7.21	7.19	7.19	7.2	7.2	7.18	7.26	7.27	7.55	7.26	7.26	7.31	7.25	7.27	7.32	7.17	7.33	7.2	8.04	7.53	7.24	7.19	7.21	7.37	7.35	8.99	7.32	7.26	7.21	7.55	7.42
0KBV1E1eQEVSudKAFg	7.18	7.18	7.23	7.19	7.2	7.22	7.14	7.2	7.19	7.16	7.24	7.22	7.2	7.24	7.21	7.16	7.19	7.2	7.18	7.21	7.24	7.2	7.25	7.18	7.2	7.2	7.31	7.2	7.24	7.24	7.25	7.29	7.22	7.25	7.16	7.26	7.21	7.23	7.17	7.3	7.19	7.28	7.21	7.21	7.17	7.25	7.21	7.15	7.22
0kBVz1Oe86uAd6iPdc	7.23	7.18	7.17	7.2	7.16	7.18	7.24	7.16	7.15	7.18	7.27	7.3	7.2	7.14	7.22	7.2	7.21	7.17	7.31	7.2	7.34	7.41	7.2	7.32	7.2	7.24	7.22	7.2	7.28	7.24	7.23	7.2	7.2	7.23	7.17	7.38	7.24	7.17	7.31	7.25	7.22	7.18	7.17	7.12	7.19	7.25	7.3	7.25	7.15
0KCAxMfhvAgIyVKsqE	7.08	7.09	7.09	7.04	7.09	7.18	7.08	7.13	7.06	7.1	7.13	7.09	7.16	7.15	7.14	7.09	7.13	7.08	7.15	7.15	7.16	7.1	7.09	7.08	7.06	7.13	7.18	7.08	7.11	7.12	7.13	7.12	7.22	7.12	7.14	7.1	7.15	7.15	7.14	7.08	7.14	7.11	7.12	7.09	7.14	7.06	7.12	7.18	7.17
0kCb9VUXcMpUTYibkw	7.39	7.41	7.44	7.37	7.33	7.36	7.31	7.32	7.36	7.27	7.32	7.31	7.37	7.39	7.34	7.33	7.38	7.32	7.32	7.63	7.36	7.4	7.39	7.8	7.4	7.44	7.34	7.5	7.31	7.41	7.35	7.41	7.36	7.32	7.35	7.34	7.34	7.31	7.35	7.39	7.42	7.36	7.33	7.29	7.33	7.32	7.22	7.45	7.29
0KCd4o6_S4oJOrfwoc	7.95	7.94	8.18	8.76	7.66	8.33	7.72	8.58	8.05	8.15	7.93	8.18	7.47	8.09	8.12	8.04	8.31	10.68	8.07	8.04	8.7	10.19	7.34	8.36	8	8.23	8.06	7.91	7.47	7.94	8.15	8.34	8.08	7.77	8.02	8.17	7.91	7.86	8.45	7.73	8.21	7.78	7.66	8.06	8.61	7.99	8.03	8.18	8.63
0KceifCoFh5ev4NUXU	7.25	7.16	7.17	7.19	7.23	7.18	7.17	7.15	7.2	7.23	7.27	7.19	7.17	7.24	7.23	7.2	7.21	7.22	7.2	7.19	7.22	7.18	7.19	7.15	7.18	7.25	7.15	7.22	7.21	7.23	7.19	7.21	7.21	7.22	7.28	7.17	7.14	7.25	7.28	7.21	7.24	7.2	7.3	7.21	7.19	7.15	7.2	7.26	7.14
0kCUyCe6eVKkKUILgo	9.25	9.78	9.34	8.94	10.85	10.12	9.45	10.42	8.85	9.22	9.99	9.65	10.12	10.79	9.29	9.59	9.51	8.83	10.44	10.81	9.84	9	11.12	9.62	9.54	10.56	9.73	11.53	9.71	10.12	11.38	10.5	9.68	10.18	9.54	9.9	9.72	10.08	9.79	10.17	9.94	9.43	9.44	9.42	9.44	10.2	10.16	10.33	9.74
0Kdm2BkRsiDJMqGOGo	7.34	7.44	7.4	7.48	7.43	7.49	7.35	7.41	7.37	7.35	7.39	7.41	7.4	7.38	7.28	7.39	7.37	7.3	7.51	7.56	7.35	7.74	7.42	8.16	7.6	7.37	7.38	7.45	7.54	7.45	7.4	7.35	7.45	7.48	7.32	7.51	7.39	7.33	7.41	7.38	7.32	7.32	7.39	7.36	7.38	7.5	7.63	7.35	7.37
0kDorJKIsiUHJQA1Xo	7.24	7.27	7.33	7.31	7.28	7.32	7.31	7.27	7.26	7.3	7.33	7.42	7.26	7.39	7.36	7.33	7.36	7.3	7.21	7.33	7.29	7.39	7.21	7.19	7.22	7.31	7.33	7.34	7.27	7.3	7.3	7.32	7.28	7.33	7.32	7.26	7.27	7.34	7.35	7.31	7.34	7.27	7.44	7.37	7.29	7.27	7.28	7.34	7.37
0Ke71YivUKqEvkWUt8	7.43	7.44	7.42	7.34	7.39	7.41	7.35	7.44	7.45	7.38	7.48	7.36	7.46	7.36	7.44	7.37	7.41	7.35	7.38	7.53	7.44	7.23	7.44	7.33	7.36	7.46	7.39	7.5	7.42	7.51	7.46	7.39	7.36	7.51	7.34	7.38	7.42	7.27	7.46	7.36	7.4	7.45	7.44	7.35	7.35	7.23	7.41	7.47	7.37
0Ke_oeoV1cV5VJyEDA	7.32	7.33	7.37	7.41	7.33	7.29	7.24	7.31	7.38	7.29	7.4	7.36	7.26	7.19	7.26	7.3	7.33	7.45	7.37	7.5	7.32	7.27	7.36	7.5	7.33	7.41	7.28	7.31	7.27	7.24	7.26	7.33	7.4	7.3	7.26	7.38	7.25	7.24	7.35	7.29	7.26	7.3	7.32	7.28	7.26	7.33	7.29	7.31	7.26
0Kei0u3lXit.wvip6g	8.17	8.54	8.38	8.38	8.62	8.2	8.38	8.27	9.1	7.87	7.75	8.36	8.06	7.96	8.19	8.07	8.79	8.13	8.75	8.21	8.62	8	9.05	8.84	8.99	8.71	8.21	9.05	8.83	8.85	8.7	9.25	8.36	8.45	8.15	8.44	8.41	8.3	9.17	8.68	8.45	8.11	8.13	8.84	8.15	8.39	8.25	8.88	8.89
0kEm6uB1AhSOeLgJJY	7.18	7.11	7.16	7.1	7.17	7.2	7.19	7.09	7.16	7.15	7.18	7.13	7.19	7.15	7.12	7.14	7.19	7.18	7.15	7.16	7.19	7.1	7.15	7.09	7.12	7.16	7.22	7.17	7.14	7.17	7.24	7.2	7.14	7.03	7.14	7.11	7.12	7.21	7.13	7.17	7.16	7.14	7.11	7.11	7.12	7.1	7.11	7.18	7.14
0kEp0etGj_7e4f_4Co	8.05	7.91	8.04	7.97	7.65	8.96	8.06	9.6	8.24	7.8	8.05	8.03	8.31	8.28	7.99	7.83	9.15	7.97	8.42	8.22	8.01	8.18	7.45	7.97	8.38	7.51	8.64	7.51	8.24	7.96	7.65	7.81	8.97	8.28	7.81	7.97	8.27	7.84	7.97	7.81	7.84	7.92	7.96	8.3	7.84	8	8.64	8.13	8.16
0keQSHcUiOQIgmIikU	7.16	7.28	7.24	7.1	9.31	7.32	7.44	7.38	7.31	7.11	7.21	7.44	7.21	8.31	7.86	8.05	7.34	7.17	7.16	7.62	7.18	7.16	7.21	7.13	7.08	7.65	7.12	7.2	7.14	7.2	7.2	7.11	7.12	7.14	8.18	7.16	7.19	7.61	7.12	7.17	7.19	7.22	7.67	7.45	7.15	7.22	7.17	7.67	7.45
0KFaSXKm4rTkCdckAQ	7.26	7.21	7.29	7.18	7.16	7.17	7.22	7.23	7.24	7.17	7.17	7.18	7.18	7.25	7.25	7.19	7.19	7.22	7.31	7.25	7.23	7.36	7.38	7.32	7.38	7.27	7.2	7.23	7.21	7.28	7.22	7.21	7.26	7.32	7.2	7.27	7.21	7.25	7.2	7.27	7.29	7.26	7.17	7.13	7.3	7.25	7.26	7.22	7.21
0KFI_KSRwko5fdeihg	7.94	8.57	8.8	8.29	8.42	7.98	7.93	8.38	9.26	8.78	8.2	8.31	8.29	8.75	8.17	8.38	8.31	8.15	8.87	8.6	9.02	7.85	8.51	8.43	7.78	8.31	8.24	8.91	8.23	8.41	8.62	8.38	8.48	8.65	8.69	8.55	8.13	8.23	8.53	10.39	8.92	8.45	8.86	8.01	8.84	8.7	8.58	8.12	8.2
0kfqL._Rwowup6d90E	7.2	7.2	7.22	7.17	7.26	7.27	7.28	7.24	7.25	7.26	7.21	7.22	7.24	7.26	7.26	7.21	7.17	7.23	7.27	7.27	7.21	7.23	7.2	7.27	7.27	7.24	7.28	7.21	7.28	7.17	7.23	7.26	7.18	7.27	7.21	7.24	7.17	7.23	7.23	7.27	7.23	7.23	7.25	7.22	7.21	7.23	7.17	7.27	7.32
0KFsA5Do41JLMQv6iY	7.2	7.15	7.15	7.17	7.14	7.17	7.11	7.19	7.17	7.21	7.12	7.15	7.21	7.09	7.15	7.1	7.13	7.12	7.14	7.18	7.21	7.19	7.2	7.17	7.19	7.13	7.13	7.16	7.18	7.21	7.16	7.18	7.05	7.1	7.13	7.23	7.15	7.13	7.17	7.07	7.17	7.15	7.18	7.16	7.15	7.26	7.18	7.18	7.12
0kgkOi4F3nVREnpxHk	10.05	10.13	9.99	9.38	9.76	9.6	8.9	9.94	10.34	9.61	10.07	9.82	9.52	10.2	10.08	9.47	9.57	10.13	10.42	11.01	10.61	9.95	10.57	9.68	10.15	9.79	9.79	10.7	9.77	10.07	10.71	10.61	9.03	9.8	9.83	10.16	9.33	10.08	10.26	9.71	10.66	9.96	10.08	9.58	9.92	10.04	9.92	10.4	10.04
0KgokCooLYooIbpoN4	7.28	7.3	7.22	7.26	7.29	7.33	7.28	7.25	7.27	7.28	7.25	7.36	7.21	7.27	7.3	7.28	7.3	7.29	7.25	7.34	7.24	7.2	7.2	7.18	7.2	7.26	7.32	7.23	7.24	7.3	7.3	7.3	7.33	7.2	7.31	7.24	7.28	7.23	7.27	7.19	7.29	7.27	7.31	7.33	7.3	7.26	7.22	7.24	7.26
0KgpIcieoQJ7R6wLJI	7.32	7.23	7.21	7.26	7.18	7.32	7.26	7.25	7.23	7.26	7.25	7.25	7.26	7.26	7.22	7.27	7.23	7.35	7.2	7.21	7.28	7.2	7.19	7.16	7.19	7.29	7.22	7.24	7.24	7.19	7.22	7.24	7.26	7.27	7.29	7.17	7.27	7.24	7.25	7.22	7.27	7.27	7.31	7.29	7.32	7.23	7.21	7.23	7.19
0Kguo1iXsgqKTgH7oo	7.35	7.28	7.27	7.24	7.27	7.34	7.29	7.28	7.24	7.33	7.27	7.38	7.26	7.29	7.27	7.33	7.33	7.31	7.22	7.18	7.24	7.18	7.2	7.17	7.2	7.29	7.31	7.17	7.23	7.21	7.2	7.28	7.24	7.18	7.27	7.21	7.28	7.32	7.32	7.21	7.18	7.27	7.35	7.24	7.32	7.25	7.16	7.19	7.3
0khDm5_b1JRN8dFeik	7.17	7.15	7.21	7.17	7.24	7.2	7.22	7.15	7.18	7.19	7.18	7.18	7.13	7.2	7.21	7.17	7.21	7.11	7.16	7.18	7.2	7.17	7.15	7.15	7.18	7.16	7.19	7.18	7.13	7.22	7.25	7.23	7.19	7.22	7.24	7.14	7.25	7.18	7.16	7.23	7.19	7.23	7.12	7.19	7.18	7.12	7.19	7.22	7.24
0Khn5pR8TSM9eXbpVM	7.12	7.11	7.14	7.13	7.16	7.08	7.03	7.09	7.12	7.07	7.11	7.15	7.1	7.1	7.13	7.14	7.17	7.26	7.17	7.19	7.2	7.2	7.25	7.17	7.19	7.18	7.11	7.05	7.17	7.16	7.15	7.24	7.19	7.16	7.12	7.14	7.14	7.12	7.18	7.2	7.1	7.14	7.12	7.03	7.13	7.14	7.17	7.11	7.21
0khvJKd9AMHU65EokU	8.35	8.73	9.01	8.25	8.5	8.64	8.71	8.17	8.09	8.63	7.87	8.72	8.98	7.85	9	8.68	9.53	9.89	7.76	7.34	7.38	7.76	7.48	7.19	7.88	7.28	8.5	7.3	7.34	7.4	7.82	7.84	7.81	7.64	8.52	7.93	8.6	7.82	7.53	7.91	7.83	9.23	8.11	9	8.25	7.5	7.79	7.65	8.33
0ki1IanvjdHl7K_CdI	11.45	10.29	11.32	10.93	10.31	11.03	10.66	10.67	11.23	11.49	10.93	9.67	10.76	10.5	10.66	11.28	11.14	11.49	11.08	11.32	11.52	10.9	10.93	11.22	10.51	10.54	11.27	11.11	10.25	10.47	10.99	10.17	10.96	11.48	10.86	11.34	10.47	10.68	11.62	10.9	11.09	10.88	10.28	10.71	11.18	11.06	11.12	10.36	10.32
0KI6VQQkVZ.5JIoni8	10.95	11.04	10.4	11.21	11.31	10.68	11.06	10.77	10.41	10.57	10.6	10.24	10.52	10.73	10.6	10.17	10.75	11	9.87	9.5	10.12	10.98	9.94	10.41	11.16	10.45	10.81	10.03	10.39	10.87	9.97	9.57	11.24	10.62	10.35	10.45	10.22	10.22	9.73	10.4	10.73	11.08	9.96	11	9.62	9.98	10.54	11.34	10.24
0kiEgQfbMoWx16EU.U	9.97	9.76	9.73	10.31	10.12	8.99	9.4	9.64	10.1	9.63	10.13	10.72	9.6	9.97	10.06	10.33	10	9.78	9.48	9.25	9.18	8.91	9.54	9.48	9.33	9.51	10.32	9.77	10.03	9.25	9.43	9.63	9.74	9.6	10.24	9.36	10.86	10.16	9.55	9.6	9.97	10.36	9.88	9.75	9.67	9.39	9.31	9.83	10.53
0kiKSd96d6CCk9CUN0	7.36	7.45	7.52	7.44	7.36	7.3	7.24	7.36	7.34	7.74	7.46	7.39	7.3	7.33	7.36	7.31	7.3	7.37	7.31	7.24	7.34	7.36	7.48	7.54	7.33	7.35	7.39	7.3	7.35	7.28	7.24	7.26	7.34	7.29	7.45	7.38	7.33	7.35	7.3	7.29	7.32	7.34	7.51	7.51	7.5	7.38	7.24	7.22	7.33
0kilIFCOo.V54HO4jk	8.5	8.91	8.11	8.48	7.82	8.18	8.63	8.94	9.25	8.47	10.06	7.49	9.07	7.8	8.83	9.24	8.19	7.97	8.16	8.92	8.16	11.53	8.05	10.19	8.69	7.26	8.2	7.4	7.52	7.56	7.77	7.72	7.95	8.49	8	8.12	7.59	8.07	7.77	8.6	7.84	8.5	8.59	8.29	8.78	8	7.78	8.24	7.64
0kIqEolSCIR4oQiNEU	8.9	9.27	9.22	9.06	8.48	9.06	8.42	8.92	9.55	9.33	8.45	9.16	9.22	9.02	8.73	9.4	9.27	8.91	8.18	8.09	8.68	7.82	7.89	7.44	7.79	8.34	9.2	8.63	8.08	8.01	8.61	8.72	8.89	8.25	9.37	8.13	8.95	8.59	8.63	8.12	8.13	8.74	8.57	10.18	9	8.11	8	8.28	8.83
0kIUeIHuWZ6wgiueOk	7.31	7.32	7.37	7.43	7.26	7.24	7.4	7.29	7.24	7.36	7.27	7.24	7.37	7.25	7.35	7.29	7.33	7.48	7.28	7.37	7.37	7.53	7.3	7.63	7.22	7.28	7.36	7.24	7.36	7.31	7.37	7.3	7.27	7.44	7.3	7.26	7.32	7.33	7.48	7.28	7.26	7.37	7.3	7.34	7.36	7.28	7.29	7.27	7.3
0kiVg9eFRKB6iMAd7o	7.24	7.26	7.2	7.27	7.2	7.17	7.24	7.24	7.21	7.2	7.2	7.29	7.21	7.28	7.26	7.29	7.23	7.26	7.22	7.21	7.26	7.25	7.3	7.23	7.36	7.26	7.34	7.23	7.24	7.23	7.25	7.19	7.26	7.32	7.28	7.32	7.27	7.31	7.24	7.26	7.29	7.24	7.25	7.28	7.15	7.21	7.26	7.26	7.24
0KJTUCcCUEetF_6Dqk	7.25	7.19	7.27	7.3	7.26	7.29	7.25	7.28	7.31	7.25	7.25	7.27	7.24	7.3	7.31	7.23	7.27	7.28	7.29	7.29	7.3	7.2	7.24	7.22	7.24	7.24	7.21	7.28	7.31	7.27	7.33	7.27	7.29	7.26	7.28	7.31	7.29	7.33	7.19	7.25	7.32	7.32	7.27	7.25	7.18	7.24	7.29	7.27	7.35
0KJVK2mrvVKCKCwN5A	8.25	8.05	7.95	8.19	7.88	7.69	7.9	7.59	7.68	7.62	7.6	7.54	7.69	7.62	7.87	8.12	8.31	8.28	8.01	7.88	8.14	7.79	8.16	8.25	7.84	8.24	7.66	8.24	7.85	8.06	8.35	7.99	7.84	8.03	7.9	7.68	7.72	8.11	8.11	7.95	8.04	7.71	7.48	7.65	7.84	7.87	7.83	8.06	7.88
0kk8OpZ4Tgzosv93JA	7.24	7.23	7.26	7.19	7.25	7.18	7.21	7.24	7.21	7.2	7.27	7.28	7.17	7.21	7.28	7.23	7.24	7.16	7.23	7.2	7.23	7.25	7.37	7.41	7.21	7.31	7.39	7.21	7.23	7.18	7.27	7.22	7.25	7.3	7.18	7.18	7.27	7.34	7.26	7.27	7.25	7.14	7.2	7.27	7.19	7.29	7.23	7.29	7.32
0KKaoWJxBmvaP6aq.8	9.14	8.39	8.5	8.23	8.54	9.76	9.41	9.97	8.6	9.48	9.09	8.57	9.13	10.89	8.56	9.13	8.87	10.34	8.99	8.84	8.43	8.96	8.46	8.94	8.55	9.05	8.93	8.74	8.46	9.67	8.21	8.45	8.1	9.69	7.97	8.46	8.24	9.11	9.25	9.27	8.71	8.9	9.45	7.68	8.88	7.8	8.35	8.64	7.96
0kKdJF6zgp4BCJr5Ek	7.22	7.22	7.2	7.21	7.2	7.38	7.2	7.24	7.21	7.26	7.19	7.16	7.24	7.21	7.31	7.2	7.25	7.17	7.19	7.19	7.2	7.19	7.22	7.18	7.21	7.27	7.21	7.22	7.2	7.2	7.26	7.26	7.24	7.27	7.21	7.2	7.2	7.28	7.2	7.28	7.35	7.2	7.21	7.22	7.17	7.13	7.18	7.26	7.22
0kKfefXXVFHVLXbVIE	7.23	7.34	7.41	7.48	7.42	7.34	7.21	7.29	7.32	7.54	7.39	7.41	7.28	7.39	7.2	7.41	7.44	7.45	7.26	7.35	7.35	7.21	7.22	7.2	7.22	7.19	7.31	7.18	7.27	7.21	7.24	7.2	7.17	7.18	7.36	7.28	7.27	7.16	7.19	7.15	7.25	7.3	7.44	7.36	7.34	7.35	7.3	7.23	7.26
0kKfldyJJLUR7F6Ie8	7.19	7.19	7.16	7.21	7.23	7.22	7.18	7.24	7.17	7.18	7.23	7.26	7.22	7.16	7.17	7.2	7.18	7.17	7.31	7.27	7.26	7.24	7.21	7.44	7.21	7.2	7.23	7.21	7.27	7.25	7.23	7.18	7.21	7.27	7.18	7.26	7.19	7.18	7.24	7.31	7.21	7.22	7.18	7.18	7.27	7.27	7.36	7.21	7.24
0kkvjVSnHQoZIza3_U	7.36	7.37	7.47	7.37	7.36	7.51	7.42	7.36	7.44	7.39	7.38	7.36	7.42	7.37	7.4	7.33	7.42	7.35	7.39	7.33	7.3	7.48	7.4	7.52	7.34	7.4	7.45	7.42	7.29	7.41	7.35	7.44	7.3	7.38	7.42	7.29	7.42	7.48	7.33	7.46	7.47	7.44	7.26	7.39	7.29	7.4	7.27	7.47	7.41
0klHXTogIo8USfs0iU	7.19	7.2	7.2	7.17	7.21	7.25	7.23	7.24	7.21	7.19	7.22	7.27	7.22	7.19	7.16	7.26	7.17	7.17	7.23	7.29	7.25	7.2	7.2	7.22	7.19	7.23	7.25	7.22	7.2	7.24	7.21	7.3	7.19	7.25	7.19	7.2	7.17	7.25	7.26	7.25	7.23	7.23	7.16	7.23	7.86	7.35	7.25	7.23	7.26
0KlmhukvdKXfqNl0II	7.13	7.37	7.18	7.13	7.1	7.13	7.12	7.09	7.07	7.15	7.13	7.1	7.11	7.1	7.18	7.1	7.18	7.12	7.17	7.18	7.19	7.17	7.15	7.14	7.16	7.15	7.08	7.12	7.16	7.16	7.2	7.04	7.17	7.05	7.1	7.18	7.21	7.08	7.16	7.09	7.15	7.11	7.11	7.06	7.2	7.13	7.17	7.11	7.18
0klXb0krH0OSKFDupI	7.61	7.58	7.45	7.44	7.35	7.31	7.39	7.25	7.34	7.31	7.52	7.58	7.41	7.33	7.34	7.62	7.35	7.33	7.21	7.69	7.42	8.15	7.54	8.03	7.52	7.35	7.28	7.41	7.27	7.35	7.38	7.26	7.27	7.37	7.31	7.53	7.45	7.55	7.35	7.32	7.33	7.42	7.19	7.4	7.46	7.54	7.83	7.3	7.38
0kLxNAqsGCuDn1Ypas	8.03	7.82	7.58	7.71	7.84	8.17	7.94	7.77	8.1	7.91	7.6	7.56	7.95	7.81	7.88	8.1	7.73	7.78	7.64	7.94	7.86	7.88	7.79	7.62	7.44	7.55	7.81	7.78	7.7	7.94	7.84	7.43	7.65	8.06	7.94	8.26	7.51	8.07	8.04	8.01	7.75	8.21	8.03	7.68	8.16	7.96	9.2	7.64	7.61
0KM31DdX_tWqo6UBfk	7.27	7.32	7.42	7.37	7.3	7.27	7.31	7.35	7.36	7.27	7.36	7.25	7.25	7.36	7.27	7.23	7.3	7.36	7.62	7.85	7.49	7.73	7.76	7.94	7.85	7.42	7.32	7.39	7.41	7.4	7.37	7.29	7.42	7.34	7.31	7.68	7.27	7.39	7.33	7.33	7.31	7.34	7.27	7.32	7.27	7.48	7.62	7.39	7.27
0KMjgjgiTFKVRXp3V4	7.82	7.54	7.98	7.59	7.93	7.49	7.68	7.46	7.62	7.53	7.67	7.57	7.82	7.46	7.4	7.89	7.7	7.59	7.63	8.12	7.75	7.89	8.29	7.98	7.77	7.45	7.6	7.94	7.67	7.8	8.04	7.61	7.42	7.5	7.72	7.81	7.51	7.72	7.41	7.81	7.62	7.7	7.5	7.53	7.55	8.07	7.83	7.47	7.54
0kneCOQLirZ7eVPjIo	11.11	10.24	12.22	11.23	10.65	11.66	11.92	10.55	10.22	11.37	11.19	11.13	11.2	13.41	11.02	12.06	11.6	11.41	10.93	10.87	9.67	9.64	8.95	10.28	9.81	11.25	11.79	10.22	10.2	9.96	10.43	11.14	10.84	11.24	12.23	10.02	10.78	9.48	10.27	9.44	9.5	12.07	12.83	12.51	12.06	9.76	11.16	9.35	11.48
0kNIngzSCOXk.dTggg	7.13	7.21	7.15	7.15	7.15	7.2	7.18	7.19	7.22	7.14	7.18	7.13	7.21	7.22	7.24	7.19	7.17	7.23	7.18	7.21	7.22	7.19	7.17	7.18	7.22	7.25	7.16	7.24	7.26	7.17	7.2	7.22	7.21	7.17	7.16	7.23	7.14	7.13	7.24	7.21	7.17	7.1	7.16	7.16	7.14	7.25	7.21	7.2	7.14
0knNRITxZNw9_OU5.o	7.15	7.18	7.17	7.18	7.19	7.23	7.16	7.16	7.16	7.15	7.17	7.2	7.16	7.22	7.19	7.13	7.13	7.17	7.29	7.51	7.23	7.28	7.32	7.25	7.27	7.21	7.16	7.21	7.31	7.23	7.2	7.2	7.27	7.25	7.16	7.39	7.22	7.17	7.22	7.18	7.23	7.11	7.18	7.25	7.14	7.47	7.21	7.25	7.16
0kno.2xFVK.4WBGw54	10.13	10.18	10.14	9.18	10.32	9.79	10.01	10.04	10.41	11.18	9.53	9.29	10.47	10.03	10.19	9.66	9.81	9.2	10.54	10.7	9.74	9.49	10.76	9.92	9.21	10.53	10.51	10.31	9.31	10.13	10.21	10.45	10.42	9.43	10.55	10.69	10.21	10.89	10.06	10.35	10.76	10.16	10.96	9.71	9.46	10.3	10.08	9.89	10.3
0knRyVFXXc.6sIg.HE	7.25	7.74	7.37	8.51	7.31	8.21	7.91	8.16	7.72	7.24	8.19	7.57	7.51	7.87	8.19	7.7	7.76	7.64	8.44	7.21	8.17	10.74	9.39	8.96	8.61	8.1	7.71	7.41	8.2	7.72	7.37	7.67	8.42	7.77	7.17	8.54	7.24	8.29	8.05	8.14	9.1	7.59	7.17	7.67	7.26	7.99	8.61	9.04	8.42
0knsQAeVFJSO4V0pTQ	10.1	9.96	10.17	8.62	9.6	8.71	9.97	9.18	9.14	9.5	9.06	8.8	10.82	9.46	9.15	10.59	9.61	8.2	9.65	10.55	10.15	10.5	12.17	9.94	10.08	9.71	9.95	11.12	9.52	10.52	11.19	10.38	10.32	9.62	10.52	10.55	10.31	10.89	9.92	11.22	9.65	10.2	9.14	9.38	8.36	11.16	10.11	9.57	9.54
0knvqO7E24JUXrpbrw	7.13	7.33	7.2	7.28	7.16	7.28	7.2	7.28	7.2	7.53	7.2	7.25	7.19	7.23	7.23	7.22	7.23	7.16	7.22	7.29	7.29	7.2	7.22	7.24	7.21	7.31	7.23	7.22	7.32	7.34	7.23	7.26	7.21	7.15	7.26	7.27	7.22	7.36	7.24	7.27	7.2	7.21	7.42	7.4	7.17	7.29	7.19	7.52	7.16
0KO7oD18O1ISC3nkqk	7.5	7.44	7.43	7.41	7.4	7.38	7.39	7.46	7.41	7.39	7.39	7.34	7.47	7.35	7.32	7.39	7.46	7.38	7.42	7.4	7.32	7.36	7.47	7.41	7.39	7.39	7.4	7.35	7.26	7.37	7.44	7.5	7.41	7.35	7.38	7.32	7.38	7.36	7.46	7.46	7.38	7.35	7.43	7.45	7.33	7.42	7.41	7.43	7.33
0ko95AO7dFRx4j70lU	11.96	12.23	11.46	11.54	12.2	10.99	11.55	11.86	11.31	11.67	11.85	11.55	11.5	11.59	11.65	11.65	11.85	11.34	11.71	11.6	11.64	11.56	11.99	11.44	11.46	12.21	11.75	12.02	11.74	12.08	11.88	11.71	11.69	11.76	12.11	11.43	12.07	11.94	11.7	11.62	12.08	12.31	11.35	11.61	11.75	11.68	12	11.64	11.88
0KoCHH16FOEJ5x3ink	7.37	7.31	7.35	7.33	7.33	7.31	7.35	7.31	7.37	7.24	7.34	7.22	7.31	7.41	7.26	7.31	7.34	7.26	7.3	7.19	7.24	7.23	7.26	7.22	7.2	7.24	7.26	7.41	7.21	7.37	7.4	7.32	7.4	7.27	7.37	7.26	7.36	7.3	7.29	7.31	7.3	7.3	7.27	7.26	7.19	7.19	7.2	7.39	7.22
0koFF9dQjXRzpB7oVU	7.18	7.17	7.17	7.2	7.19	7.12	7.14	7.18	7.18	7.19	7.14	7.16	7.18	7.13	7.16	7.24	7.25	7.2	7.19	7.18	7.21	7.22	7.2	7.18	7.2	7.21	7.2	7.2	7.31	7.16	7.17	7.18	7.21	7.17	7.26	7.2	7.2	7.23	7.24	7.17	7.18	7.18	7.18	7.2	7.2	7.19	7.21	7.18	7.21
0KogVTXSJ51SUmLSiQ	7.48	7.36	7.46	7.48	7.41	7.42	7.49	7.46	7.46	7.37	7.5	7.33	7.39	7.45	7.5	7.35	7.43	7.45	7.66	7.8	7.56	7.74	7.72	7.77	7.65	7.47	7.41	7.52	7.67	7.49	7.55	7.58	7.48	7.49	7.39	7.35	7.45	7.48	7.51	7.54	7.42	7.46	7.37	7.5	7.43	7.48	7.47	7.86	7.43
0kOKp5oj9Hp7XsSvaE	7.26	7.28	7.26	7.19	7.24	7.23	7.3	7.27	7.25	7.28	7.29	7.14	7.33	7.26	7.27	7.23	7.28	7.24	7.19	7.18	7.21	7.2	7.25	7.16	7.21	7.25	7.22	7.25	7.18	7.31	7.35	7.22	7.26	7.28	7.28	7.2	7.3	7.26	7.29	7.33	7.25	7.27	7.27	7.25	7.2	7.17	7.18	7.31	7.25
0kOVSDp9T_UpcUFweM	7.39	7.24	7.33	7.21	7.23	7.18	7.3	7.21	7.21	7.55	7.27	7.29	7.25	7.24	7.19	7.34	7.25	7.18	7.29	7.24	7.2	7.25	7.51	7.18	7.59	7.31	7.47	7.65	7.23	7.44	7.52	7.39	7.84	7.27	7.34	7.19	8.17	7.57	7.35	7.37	7.25	7.43	7.16	7.22	7.2	7.82	7.19	7.37	7.69
0kOxInL.0k1_EkfrHo	7.2	7.19	7.16	7.16	7.1	7.11	7.17	7.13	7.2	7.17	7.14	7.15	7.18	7.14	7.13	7.14	7.14	7.12	7.18	7.19	7.19	7.18	7.18	7.17	7.13	7.13	7.17	7.12	7.18	7.16	7.16	7.15	7.17	7.14	7.14	7.14	7.13	7.13	7.15	7.17	7.1	7.14	7.12	7.19	7.22	7.14	7.18	7.17	7.18
0KP05Lre86p.km6qnk	8.29	8.33	8.58	8.45	8.53	8.61	7.94	8.22	8.72	8.47	8.28	8.31	8.23	8.15	8.68	8.41	8.32	8.47	8.42	8.28	8.63	8.36	8.4	8.46	8.29	8.55	8.52	8.59	8.06	8.63	8.72	8.61	9.14	9	8.55	8.41	8.05	8.61	8.52	8.55	8.83	8.4	8.5	8.5	8.42	8.41	8.33	8.45	8.37
0KpaS4IrydUJSkqTAM	7.29	7.27	7.29	7.37	7.3	7.34	7.27	7.33	7.2	7.27	7.27	7.29	7.31	7.15	7.32	7.27	7.34	7.28	7.23	7.58	7.29	7.24	7.2	7.45	7.42	7.32	7.36	7.31	7.39	7.34	7.29	7.34	7.35	7.41	7.27	7.23	7.24	7.31	7.29	7.36	7.3	7.22	7.31	7.2	7.25	7.36	7.2	7.31	7.26
0KpKj9199_tenVCp94	9.88	9.64	8.91	9.71	9.28	9.42	10.35	9.23	8.6	8.61	9.55	8.79	9.37	8.85	9.36	9.54	9.05	10.39	9.31	9.19	10.05	10.84	10.19	10.02	10.34	9.59	9.39	9.47	9.59	9.83	9.54	9.88	9.27	9.66	9.04	9.49	9.2	9.79	9.81	9.78	9.59	9.36	9.02	9.27	9.12	9.82	9.25	9.65	9.72
0kpO3bJQOIju1dd_wU	7.16	7.14	7.17	7.21	7.26	7.12	7.09	7.08	7.08	7.16	7.19	7.16	7.16	7.07	7.15	7.15	7.19	7.17	7.18	7.18	7.17	7.15	7.18	7.11	7.15	7.14	7.16	7.15	7.19	7.14	7.14	7.14	7.14	7.21	7.13	7.17	7.09	7.17	7.12	7.11	7.17	7.11	7.16	7.11	7.15	7.14	7.23	7.09	7.19
0kpRD55S2kpSdVARSQ	7.23	7.23	7.21	7.23	7.21	7.25	7.28	7.2	7.23	7.21	7.27	7.28	7.23	7.31	7.3	7.21	7.24	7.24	7.39	7.46	7.44	7.44	7.42	7.41	7.33	7.22	7.29	7.24	7.24	7.29	7.34	7.27	7.39	7.32	7.27	7.26	7.23	7.23	7.28	7.31	7.21	7.21	7.23	7.22	7.29	7.41	7.48	7.28	7.16
0kQhVIkQkgEgRYSqig	7.5	7.42	7.51	7.45	7.42	7.47	7.54	7.47	7.43	7.51	7.46	7.48	7.48	7.48	7.44	7.42	7.53	7.51	7.71	7.86	7.7	7.68	7.66	8.01	7.77	7.5	7.52	7.43	7.58	7.54	7.65	7.52	7.46	7.62	7.48	7.59	7.47	7.47	7.45	7.53	7.6	7.4	7.48	7.46	7.43	7.62	7.7	7.45	7.49
0kqjYT4hQjkbWfXwTo	7.9	7.59	7.68	7.53	7.91	7.69	7.84	8.25	7.52	7.41	8.18	7.85	8.09	8.15	7.76	7.72	7.77	9.44	8.19	7.59	8.02	8.74	7.97	8.04	8.49	7.66	7.85	8.05	8.76	7.99	7.79	8.06	8.15	8.2	7.65	7.51	8.17	7.75	7.95	8.5	7.89	7.77	7.58	8	7.66	7.87	7.87	8.69	8.08
0kqKnkeE_OXqoX.l2I	8.39	7.81	8	7.79	7.82	7.92	8.4	8.48	7.91	7.71	8.11	7.77	8.45	7.99	8.14	8.13	7.94	8.97	8.49	8.04	8.51	8.71	8.38	8.08	8.46	8.45	8.46	8.21	8.4	8.28	8.16	8.07	8.67	8.69	8.25	8.37	8	8.49	8.46	9.1	8.3	8.35	7.87	8.23	7.47	8.22	8.57	8.65	8.25
0kR7BUoIqIKTohB4xo	7.24	7.25	7.33	7.35	7.29	7.31	7.21	7.24	7.28	7.31	7.27	7.32	7.25	7.32	7.23	7.34	7.25	7.25	7.24	7.31	7.27	7.24	7.29	7.42	7.24	7.21	7.28	7.25	7.22	7.27	7.24	7.31	7.15	7.3	7.29	7.26	7.35	7.22	7.23	7.29	7.24	7.31	7.34	7.29	7.34	7.28	7.22	7.24	7.26
0kRJ6RfdfNce6tQTrU	7.21	7.21	7.28	7.24	7.29	7.28	7.22	7.14	7.22	7.21	7.26	7.23	7.2	7.24	7.22	7.22	7.22	7.32	7.27	7.25	7.25	7.35	7.39	7.5	7.24	7.2	7.18	7.26	7.23	7.24	7.28	7.21	7.24	7.21	7.23	7.25	7.25	7.27	7.23	7.28	7.25	7.26	7.27	7.23	7.26	7.26	7.33	7.22	7.33
0KRJdHIK.oCRXmuglc	7.19	7.17	7.16	7.14	7.19	7.18	7.16	7.14	7.16	7.16	7.26	7.19	7.16	7.16	7.14	7.14	7.19	7.2	7.16	7.17	7.21	7.17	7.12	7.17	7.16	7.13	7.29	7.17	7.19	7.18	7.23	7.12	7.17	7.19	7.19	7.16	7.14	7.18	7.2	7.2	7.23	7.16	7.18	7.11	7.22	7.17	7.17	7.2	7.18
0KrOjqEggLooF6IXpU	7.41	7.32	7.34	7.29	7.24	7.26	7.35	7.26	7.23	7.33	7.21	7.26	7.27	7.17	7.31	7.32	7.26	7.31	7.16	7.32	7.21	7.21	7.19	7.18	7.19	7.26	7.22	7.31	7.2	7.31	7.22	7.25	7.27	7.27	7.34	7.22	7.37	7.28	7.31	7.27	7.3	7.26	7.25	7.23	7.29	7.19	7.21	7.26	7.15
0kS8RKlVR0goVQH6.Q	7.26	7.29	7.26	7.29	7.27	7.26	7.31	7.28	7.28	7.27	7.23	7.31	7.25	7.35	7.31	7.3	7.28	7.31	7.46	7.32	7.38	7.31	7.23	7.45	7.22	7.27	7.34	7.31	7.32	7.29	7.42	7.27	7.33	7.36	7.25	7.27	7.31	7.35	7.26	7.26	7.3	7.3	7.32	7.24	7.29	7.41	7.21	7.25	7.33
0kSdeoQrgIBf6oqISI	7.24	7.23	7.21	7.15	7.32	7.23	7.26	7.24	7.25	7.22	7.31	7.15	7.3	7.29	7.23	7.18	7.28	7.29	7.21	7.24	7.21	7.21	7.2	7.19	7.2	7.28	7.27	7.33	7.21	7.31	7.27	7.28	7.3	7.33	7.23	7.19	7.32	7.24	7.26	7.3	7.23	7.24	7.22	7.26	7.25	7.18	7.28	7.27	7.22
0KSmivggKBeo4querM	8.33	7.37	7.9	7.42	7.6	7.38	7.35	7.71	7.41	7.53	7.43	7.41	7.39	7.92	7.4	7.64	7.38	8.79	7.51	7.35	8.21	8.01	8.59	8.34	7.9	7.42	7.62	8.06	7.43	7.89	7.95	8.27	8.3	7.51	7.51	7.59	7.75	7.48	7.88	7.45	7.57	7.58	7.59	7.59	7.61	7.86	7.66	7.63	7.99
0KT3UJpl2STanenkm0	7.26	7.24	7.18	7.19	7.19	7.26	7.23	7.25	7.21	7.22	7.26	7.17	7.26	7.15	7.3	7.2	7.26	7.18	7.18	7.17	7.19	7.11	7.13	7.16	7.16	7.27	7.25	7.27	7.18	7.33	7.21	7.23	7.23	7.19	7.22	7.15	7.27	7.22	7.25	7.26	7.3	7.2	7.22	7.26	7.27	7.16	7.12	7.3	7.22
0ktegVNVTox4pMnse4	10.85	10.36	11.37	10.32	9.73	10.89	10.28	10.56	10.19	9.47	10.38	9.91	10.07	9.66	9.78	10.01	9.96	9.75	11.57	11.19	10.18	10.89	11.1	11.25	11.2	10.82	9.65	10.37	9.74	10.91	10.38	10.12	10.3	10.1	9.28	10.48	10.02	9.7	10.37	9.96	10.32	9.88	10.19	10.1	13.23	11.05	10.77	11.11	11.05
0kTfWqfi.D2OceeUCU	7.28	7.3	7.29	7.21	7.29	7.3	7.39	7.35	7.34	7.25	7.26	7.21	7.34	7.31	7.36	7.32	7.39	7.35	7.3	7.19	7.25	7.21	7.3	7.21	7.22	7.28	7.32	7.33	7.26	7.48	7.32	7.35	7.31	7.47	7.29	7.42	7.26	7.28	7.38	7.27	7.39	7.28	7.23	7.26	7.32	7.68	7.22	7.32	7.27
0KTiCBCm6R9515J5RI	7.21	7.3	7.25	7.27	7.22	7.27	7.28	7.3	7.3	7.25	7.22	7.21	7.19	7.37	7.27	7.25	7.27	7.26	7.2	7.21	7.24	7.18	7.19	7.18	7.19	7.23	7.26	7.25	7.18	7.22	7.19	7.25	7.27	7.31	7.18	7.2	7.27	7.3	7.3	7.22	7.33	7.24	7.21	7.24	7.17	7.28	7.19	7.3	7.29
0ktT.hM6oNJ8L7N4Ak	7.45	7.39	7.46	7.35	7.54	7.39	7.45	7.36	7.43	7.42	7.31	7.23	7.42	7.52	7.49	7.36	7.41	7.4	7.3	7.32	7.59	7.28	7.29	7.74	7.61	7.51	7.35	7.53	7.52	7.42	7.5	7.47	7.48	7.47	7.36	7.38	7.44	7.45	7.41	7.45	7.51	7.41	7.4	7.34	7.33	7.51	7.39	7.45	7.33
0KTv8YSCCXwhFOv0o4	7.3	7.29	7.31	7.18	7.32	7.33	7.3	7.32	7.27	7.21	7.33	7.24	7.35	7.29	7.38	7.3	7.28	7.31	7.22	7.24	7.22	7.21	7.31	7.18	7.2	7.31	7.2	7.28	7.23	7.3	7.33	7.28	7.32	7.39	7.39	7.23	7.25	7.35	7.23	7.35	7.43	7.3	7.26	7.23	7.32	7.15	7.27	7.32	7.37
0ku.dq_gCU_MKPR.CI	7.29	7.2	7.26	7.26	7.28	7.37	7.35	7.3	7.23	7.36	7.32	7.27	7.4	7.21	7.16	7.41	7.25	7.25	7.18	7.17	7.2	7.19	7.21	7.18	7.2	7.31	7.27	7.18	7.22	7.24	7.25	7.28	7.19	7.18	7.26	7.23	7.3	7.27	7.25	7.16	7.22	7.27	7.35	7.41	7.36	7.17	7.21	7.23	7.3
0kU6V3ArrDZV3mL_go	7.21	7.25	7.24	7.2	7.14	7.22	7.22	7.28	7.18	7.22	7.18	7.22	7.25	7.2	7.14	7.24	7.24	7.27	7.21	7.28	7.26	7.39	7.29	7.57	7.44	7.2	7.16	7.23	7.39	7.26	7.25	7.19	7.21	7.22	7.18	7.31	7.21	7.19	7.17	7.22	7.17	7.23	7.19	7.22	7.21	7.32	7.28	7.21	7.2
0kUJneHSqz9XaVVEBc	7.37	7.36	7.54	7.42	7.48	7.37	7.4	7.42	7.46	7.46	7.4	7.35	7.4	7.39	7.39	7.42	7.44	7.44	7.27	7.47	7.28	7.48	7.41	7.44	7.36	7.33	7.4	7.33	7.4	7.39	7.32	7.4	7.35	7.42	7.4	7.46	7.4	7.37	7.32	7.33	7.28	7.39	7.43	7.37	7.31	7.31	7.53	7.53	7.32
0KUl5Si4ICf6kDOteU	12.66	12.93	12.9	12.34	13.1	12.92	12.31	12.65	13.12	12.93	13.44	13.2	12.87	12.95	13.06	12.23	12.72	11.99	13.49	12.46	12.41	12.83	12.13	12.81	12.46	13.19	12.93	13.29	13.47	13.14	12.94	12.96	13.45	13.9	13.01	13.15	13.04	12.93	13.29	13.23	13.39	12.7	13.5	12.61	13.2	13.25	13.24	12.84	13.57
0kuM6SCEUiSOSIlP_4	12.58	12.84	13.03	13.28	12.87	12.1	12.14	11.89	13.08	13.47	13.26	12.35	12.29	13.26	12.59	13.18	12.66	12.4	10.75	10.74	10.97	9.98	10.05	9.96	9.92	11.84	12.98	10.96	10.13	11.01	11.01	10.72	11.25	11.14	12.92	10.52	12.55	12.06	10.86	10.72	11.27	12.88	13.19	13.18	13.02	10.37	10.3	11.01	12.01
0kuu29FuIt5MgdJLuU	7.86	7.61	7.39	7.14	7.3	7.21	7.31	8.53	7.22	7.16	7.5	7.38	7.54	7.48	7.32	7.35	7.72	7.21	7.38	7.19	7.23	7.4	8.39	7.45	7.19	7.27	7.78	7.35	7.63	7.58	8.08	7.22	7.92	7.78	7.34	8.03	7.94	7.51	7.75	7.55	7.71	7.57	7.23	8.14	7.07	7.75	7.13	8.74	7.64
0kuXn.QqXhOgn.QSgc	7.72	12.91	7.67	7.47	7.87	7.25	8.49	7.15	7.78	9.81	7.29	8.91	8.04	7.16	7.19	7.93	7.41	7.16	7.21	7.54	7.62	7.2	7.49	7.5	8.64	12.26	7.48	8.24	7.2	9.92	10.28	7.67	7.3	7.25	7.58	8.7	10.7	8.01	11.74	7.26	8.44	12.86	7.22	11.29	7.58	9.87	7.29	11.61	13.47
0KV.l9EiCJIR5ToVt0	7.36	7.35	7.42	7.46	7.34	7.42	7.27	7.25	7.32	7.4	7.28	7.35	7.37	7.41	7.44	7.33	7.32	7.32	7.29	7.4	7.51	7.35	7.22	7.42	7.51	7.32	7.52	7.27	7.42	7.4	7.48	7.38	7.39	7.32	7.35	7.3	7.33	7.44	7.35	7.47	7.35	7.38	7.42	7.36	7.38	7.32	7.34	7.3	7.41
0KVgI1U009lvF5SOok	12.47	12.55	12.34	12.53	11.79	12.6	12.23	12.37	12.55	12.4	12.66	12.49	11.97	12.35	12.82	11.6	12.54	11.98	12.36	12.85	12.23	11.68	12.19	12.7	12.08	12.33	12.28	12.71	12.51	12.31	12.43	13.51	13.19	12.45	12.26	13.13	12.27	12.53	12.9	12.56	12.84	11.93	12.16	12.07	11.38	12.64	12.63	12.67	13.19
0kviE4nq96tL8ip6mE	7.2	7.26	7.12	7.26	7.29	7.2	7.14	7.22	7.2	7.24	7.19	7.23	7.25	7.18	7.17	7.23	7.19	7.21	7.21	7.18	7.19	7.19	7.18	7.18	7.2	7.23	7.19	7.19	7.23	7.12	7.34	7.2	7.21	7.31	7.21	7.2	7.15	7.1	7.16	7.18	7.16	7.18	7.18	7.25	7.18	7.14	7.18	7.23	7.18
0kvk1UIw5ZXRQsgpE4	7.23	7.26	7.28	7.24	7.23	7.28	7.19	7.29	7.2	7.28	7.24	7.28	7.22	7.18	7.31	7.25	7.22	7.2	7.2	7.2	7.22	7.2	7.29	7.26	7.19	7.24	7.26	7.26	7.23	7.2	7.19	7.24	7.25	7.22	7.24	7.18	7.19	7.21	7.2	7.19	7.26	7.22	7.17	7.16	7.28	7.18	7.21	7.23	7.25
0kVPfk1epDHSB6fU1E	7.24	7.37	7.21	7.22	7.24	7.26	7.38	7.24	7.24	7.71	7.34	7.3	7.29	7.29	7.13	7.41	7.24	7.26	7.19	7.18	7.27	7.2	7.21	7.21	7.2	7.17	7.24	7.2	7.26	7.17	7.16	7.22	7.12	7.16	7.37	7.24	7.3	7.14	7.21	7.2	7.16	7.26	7.3	7.25	7.29	7.21	7.21	7.19	7.23
0KW6Gm1G2Y5XoabXbw	7.08	7.13	7.12	7.22	7.1	7.08	7.23	7.22	7.08	7.12	7.08	7.06	7.19	7.19	7.17	7.09	7.14	7.17	7.18	7.17	7.21	7.18	7.15	7.18	7.18	7.12	7.12	7.2	7.18	7.15	7.16	7.19	7.21	7.17	7.11	7.17	7.12	7.16	7.17	7.05	7.18	7.12	7.11	7.07	7.08	7.2	7.21	7.08	7.07
0KWCUmVJ.XR717oo7c	10.51	10.41	10.31	10.37	10.8	9.27	10.38	9.78	9.92	9.7	10.42	10.78	10.5	10.02	9.4	10.09	9.74	9.24	10.07	10.16	10.35	10.42	10.65	11.2	10.92	10.54	9.98	10.58	11	10.46	10.28	10.25	10.26	9.86	10.08	10.17	11.02	10.32	10.28	10.67	9.86	10.26	9.56	9.43	9.63	10.72	10.34	10.46	10.7
0KWW1N1JTK.DgjiBdI	7.13	7.21	7.18	7.17	7.15	7.13	7.14	7.16	7.24	7.16	7.12	7.12	7.04	7.1	7.11	7.15	7.16	7.1	7.19	7.26	7.24	7.2	7.21	7.18	7.19	7.12	7.12	7.13	7.17	7.04	7.13	7.11	7.12	7.15	7.17	7.22	7.15	7.15	7.15	7.18	7.2	7.14	7.11	7.16	7.25	7.3	7.22	7.09	7.1
0KX8PV6vdiG0d5ps7U	7.19	7.25	7.25	7.24	7.19	7.27	7.27	7.21	7.19	7.17	7.14	7.22	7.17	7.27	7.21	7.17	7.19	7.2	7.34	7.51	7.23	7.23	7.23	7.34	7.37	7.22	7.22	7.24	7.24	7.24	7.16	7.19	7.21	7.26	7.23	7.24	7.17	7.23	7.22	7.26	7.21	7.22	7.31	7.27	7.2	7.31	7.29	7.21	7.29
0KXfuIzCu.18LhOleY	7.21	7.49	7.16	7.29	7.32	7.14	7.28	7.2	7.1	7.12	7.9	7.25	7.51	7.18	7.51	7.23	7.14	7.23	7.17	7.19	7.19	7.97	7.18	7.18	7.26	7.12	7.11	7.16	7.25	7.23	7.12	7.16	7.21	7.37	7.16	7.37	7.18	7.66	7.18	7.23	7.34	7.32	7.08	7.1	7.17	7.18	7.25	7.14	7.12
0kXhyTu9_PkA_kikq4	7.37	7.52	7.58	7.76	7.69	7.3	7.53	7.58	7.55	7.67	7.52	7.46	7.49	8.13	7.58	7.53	7.54	7.58	7.39	7.18	7.48	7.24	7.34	7.17	7.3	7.62	7.73	7.63	7.37	7.49	7.5	7.52	7.54	7.52	7.53	7.63	7.58	7.54	7.4	7.4	7.48	7.55	7.76	7.69	7.64	7.55	7.63	7.36	7.5
0KXqUgnvhTFKLR6ICo	8.88	8.53	9.13	9.35	8.45	8.8	8.74	8.34	8.66	9.41	8.66	8.98	8.61	8.92	8.64	8.61	8.56	9.03	8.14	8.54	8.34	8.5	8.21	8.79	8.32	8.22	8.56	8.57	8.55	8.34	8.42	8.76	8.74	8.56	8.61	8.05	8.54	8.54	8.47	8.52	8.75	8.29	8.72	8.68	9.15	8.33	8.35	8.38	9.18
0kXS45Fe1wk_IpG.H4	7.58	7.87	7.62	7.65	7.76	7.62	7.41	7.44	7.81	7.77	7.61	7.64	7.68	7.68	7.59	7.61	7.49	7.39	7.78	7.23	7.52	7.2	7.35	7.18	7.34	7.66	7.44	7.62	7.93	7.74	7.84	7.73	7.52	7.51	7.75	7.84	7.59	7.99	7.52	7.72	7.36	7.58	7.78	7.53	7.71	7.74	7.94	7.51	7.59
0KYKL6K7.UqkWOp8ic	7.28	7.29	7.24	7.25	7.21	7.28	7.22	7.22	7.28	7.25	7.29	7.19	7.26	7.17	7.3	7.23	7.24	7.25	7.29	7.19	7.22	7.2	7.24	7.18	7.2	7.18	7.21	7.17	7.22	7.22	7.22	7.31	7.22	7.19	7.22	7.2	7.23	7.21	7.16	7.28	7.22	7.23	7.25	7.15	7.26	7.25	7.29	7.28	7.15
0l.mfkXf57UdQ0IGqk	7.34	7.33	7.42	7.24	7.34	7.38	7.44	7.33	7.3	7.31	7.43	7.32	7.25	7.4	7.36	7.34	7.35	7.29	7.2	7.19	7.21	7.19	7.15	7.15	7.18	7.31	7.26	7.35	7.2	7.39	7.48	7.3	7.32	7.39	7.37	7.16	7.38	7.35	7.36	7.33	7.33	7.33	7.3	7.45	7.33	7.09	7.22	7.44	7.37
0l.zWUUUmiI0uIoji4	7.19	7.21	7.22	7.17	7.22	7.14	7.2	7.17	7.17	7.18	7.16	7.18	7.18	7.18	7.15	7.16	7.16	7.06	7.29	7.21	7.23	7.31	7.2	7.18	7.21	7.21	7.17	7.23	7.21	7.21	7.22	7.19	7.15	7.16	7.11	7.25	7.16	7.21	7.22	7.1	7.13	7.26	7.18	7.15	7.17	7.2	7.21	7.2	7.19
0l1c6heXeBEhEeiNLk	7.19	7.18	7.16	7.23	7.13	7.12	7.19	7.19	7.19	7.22	7.24	7.14	7.24	7.14	7.2	7.16	7.16	7.18	7.23	7.18	7.21	7.21	7.24	7.18	7.2	7.22	7.16	7.2	7.2	7.21	7.19	7.14	7.19	7.2	7.13	7.17	7.14	7.19	7.23	7.2	7.17	7.19	7.17	7.12	7.17	7.21	7.18	7.15	7.24
0l1Cl0OE1Fh94dfUko	8.82	8.84	8.49	7.61	9.1	8	8	8.29	7.42	8.61	8.48	7.7	7.9	8.34	8.16	7.87	8.1	8.03	8.12	8.51	8.28	8.13	9.05	8.71	8.25	8.08	7.62	7.59	7.95	7.99	9.21	8.14	7.65	7.86	7.73	7.79	7.9	7.7	8.36	8.03	8.62	7.75	7.68	8.15	7.44	7.69	7.51	8.34	7.9
0l1ggeof8imJxQlTXs	7.19	7.19	7.17	7.15	7.22	7.22	7.21	7.24	7.2	7.25	7.23	7.23	7.25	7.17	7.25	7.2	7.19	7.16	7.34	7.2	7.22	7.32	7.27	7.53	7.35	7.19	7.18	7.24	7.2	7.23	7.17	7.19	7.16	7.11	7.22	7.34	7.12	7.12	7.2	7.26	7.16	7.28	7.17	7.21	7.17	7.41	7.46	7.24	7.16
0l3pL.4i50NMcR75SQ	7.51	7.33	7.59	7.97	7.52	8.17	7.73	7.75	7.41	7.64	7.49	7.51	7.86	7.58	7.83	7.6	7.62	7.85	7.82	7.19	7.42	7.6	7.2	7.21	7.42	7.83	8.06	7.59	7.47	7.69	7.95	7.24	7.54	7.91	7.88	7.64	7.83	7.7	7.96	7.78	7.56	7.61	7.66	7.8	7.44	7.37	7.4	7.63	7.39
0l3s_7FIMwOMRd4VSY	10.56	10.84	12.9	10.23	14.16	11.17	11.89	9.04	12.64	12.8	10.93	11.91	12.69	11.96	12.94	12.63	11.95	13.13	10.13	10.7	10.04	7.73	7.31	9.15	11.98	10.64	11.17	9.42	9.79	10.89	8.63	10.88	8.64	9.53	12.12	9.62	10.07	12.8	8.89	11.2	10.11	12.24	12.37	10.82	12.98	8.85	9.97	8.96	9.95
0l44wIkCaAojiIqVKU	7.19	7.16	7.17	7.14	7.11	7.25	7.18	7.17	7.17	7.18	7.18	7.25	7.24	7.25	7.15	7.13	7.17	7.16	7.2	7.19	7.23	7.19	7.33	7.17	7.2	7.12	7.18	7.2	7.25	7.17	7.15	7.2	7.24	7.2	7.23	7.2	7.16	7.25	7.22	7.18	7.19	7.23	7.17	7.19	7.21	7.2	7.19	7.2	7.26
0l4QqzZeIO7gjhVIiU	7.26	7.26	7.29	7.29	7.26	7.29	7.31	7.32	7.23	7.27	7.16	7.29	7.24	7.29	7.3	7.29	7.15	7.24	7.49	7.76	7.22	7.26	7.22	7.5	7.36	7.25	7.38	7.21	7.23	7.24	7.35	7.28	7.28	7.33	7.31	7.35	7.29	7.39	7.4	7.31	7.22	7.21	7.28	7.32	7.32	7.3	7.34	7.27	7.32
0l536JXoUU7AC1BxXk	7.21	7.24	7.22	7.23	7.32	7.24	7.22	7.14	7.21	7.24	7.28	7.25	7.23	7.26	7.19	7.25	7.24	7.24	7.18	7.21	7.21	7.2	7.2	7.17	7.21	7.45	7.19	7.23	7.22	7.45	7.21	7.23	7.23	7.2	7.24	7.36	7.21	7.24	7.19	7.35	7.24	7.28	7.2	7.28	7.21	7.2	7.18	7.22	7.28
0l6diHwiEDI6RKRCbs	7.22	7.31	7.2	7.13	7.21	7.2	7.15	7.15	7.3	7.22	7.21	7.29	7.24	7.21	7.21	7.19	7.21	7.29	7.19	7.2	7.23	7.2	7.2	7.41	7.19	7.25	7.2	7.16	7.19	7.26	7.21	7.2	7.25	7.3	7.21	7.2	7.19	7.24	7.17	7.23	7.26	7.2	7.21	7.29	7.27	7.29	7.23	7.24	7.22
0l6FEp0fX.eIRN5NcU	7.08	7.13	7.17	7.14	7.1	7.1	7.15	7.08	7.17	7.1	7.14	7.05	7.04	7.14	7.13	7.1	7.08	7.11	7.12	7.19	7.19	7.17	7.18	7.17	7.18	7.12	7.12	7.18	7.14	7.12	7.13	7.09	7.16	7.19	7.11	7.14	7.09	7.1	7.11	7.14	7.18	7.15	7.09	7.16	7.1	7.12	7.12	7.12	7.15
0l6ilIq14MejhReP04	7.18	7.21	7.2	7.19	7.21	7.25	7.13	7.13	7.14	7.13	7.14	7.17	7.14	7.26	7.14	7.15	7.16	7.18	7.23	7.19	7.22	7.23	7.21	7.32	7.22	7.15	7.13	7.16	7.3	7.2	7.2	7.22	7.16	7.18	7.13	7.2	7.18	7.16	7.14	7.19	7.15	7.21	7.16	7.17	7.18	7.16	7.27	7.22	7.23
0l6S_fV3LrR.lxCQgg	7.12	7.18	8.3	7.25	7.2	7.13	7.08	7.58	7.2	7.66	7.17	7.15	7.21	7.11	7.12	7.22	7.19	7.16	7.57	7.19	7.17	7.18	7.19	7.17	7.17	7.14	7.2	7.28	7.19	7.2	7.18	7.04	7.17	7.17	7.12	7.19	8.42	7.14	7.19	7.19	7.21	7.15	7.11	7.21	7.26	7.12	7.2	7.22	7.28
0l7_KADQf6oYuNQR5g	8.22	8.02	9.37	8.2	7.91	8.37	8.26	7.93	8.46	9.9	8.71	7.74	8.45	8.28	8.24	8.84	7.9	8.45	7.42	7.27	7.37	7.22	7.22	7.18	7.22	7.45	8.17	7.42	7.38	7.49	7.3	7.33	7.4	7.5	8.03	7.23	7.64	7.76	7.35	7.33	7.36	8.31	9.03	8.51	9.12	7.31	7.36	7.28	7.58
0l7FZhwch.3577kC9I	8.37	8.55	8.88	9.32	9.08	8.78	9.38	9.1	8.89	9.53	9.08	9.45	9.27	9.01	8.87	8.79	9.02	9.26	8.28	8.43	8.51	8.5	7.95	8.19	8.72	8.48	8.62	8.57	8.71	8.15	7.92	8.66	8.17	8.68	9.07	7.91	9.13	9.06	8.11	7.85	8.87	8.96	9.19	9.64	9.68	7.8	8.42	8.67	8.81
0l8RzkhETEJS4G0wJU	7.24	7.15	7.18	7.18	7.2	7.22	7.19	7.26	7.24	7.2	7.23	7.22	7.24	7.23	7.23	7.24	7.16	7.16	7.15	7.18	7.19	7.13	7.15	7.11	7.13	7.22	7.21	7.22	7.16	7.23	7.25	7.31	7.25	7.23	7.31	7.13	7.22	7.22	7.28	7.29	7.25	7.21	7.22	7.29	7.31	7.17	7.16	7.21	7.32
0l9OVT8Rx_zYNWwyv0	7.14	7.18	7.18	7.22	7.12	7.2	7.15	7.16	7.15	7.26	7.17	7.19	7.18	7.22	7.18	7.11	7.17	7.17	7.24	7.19	7.19	7.2	7.18	7.19	7.17	7.18	7.21	7.21	7.25	7.22	7.14	7.1	7.12	7.23	7.19	7.23	7.18	7.15	7.15	7.19	7.18	7.15	7.18	7.14	7.21	7.16	7.17	7.2	7.18
0l9z66e8.u0q8XgnEk	7.11	7.17	7.14	7.2	7.19	7.15	7.14	7.17	7.15	7.15	7.17	7.15	7.14	7.12	7.19	7.16	7.13	7.08	7.18	7.19	7.19	7.21	7.22	7.24	7.46	7.22	7.21	7.19	7.21	7.18	7.09	7.18	7.14	7.15	7.15	7.2	7.2	7.14	7.14	7.19	7.14	7.13	7.21	7.13	7.12	7.21	7.24	7.16	7.16
0l__XuyJC8a6x5R3ko	7.33	7.33	7.25	7.17	7.24	7.23	7.29	7.27	7.29	7.23	7.23	7.3	7.34	7.42	7.27	7.41	7.3	7.27	7.2	7.17	7.2	7.18	7.19	7.19	7.17	7.18	7.26	7.18	8.04	8.31	7.23	7.21	7.26	7.29	7.35	7.43	7.34	7.24	7.24	7.24	7.29	7.37	7.31	7.41	7.58	7.35	7.33	7.29	7.2
0l_jyAiEyjrpYFVLz8	7.16	7.23	7.21	7.11	7.19	7.23	7.18	7.18	7.3	7.25	7.15	7.21	7.24	7.21	7.2	7.22	7.25	7.16	7.2	7.18	7.22	7.18	7.17	7.16	7.16	7.4	7.25	7.21	7.19	7.2	7.22	7.2	7.24	7.18	7.24	7.16	7.2	7.17	7.24	7.16	7.19	7.21	7.31	7.22	7.35	7.19	7.18	7.16	7.28
0l_mp1eNeV7dVm1b1A	7.59	7.59	7.67	7.73	7.78	7.44	7.53	7.43	7.64	7.73	7.76	7.82	7.46	7.48	7.36	7.72	7.7	7.91	7.39	7.55	7.44	7.2	7.39	7.42	7.3	7.44	7.68	7.49	7.62	7.4	7.48	7.53	7.37	7.41	7.58	7.62	7.65	7.44	7.34	7.43	7.37	7.55	7.55	7.59	7.59	7.54	7.7	7.38	7.46
0lAIiLq.qCLirr6oio	9.4	9.39	9.35	9.24	9.97	9.66	9.48	9.29	9.6	9.24	9.31	9.15	9.77	9.12	9.85	9.41	10.28	10.04	9.57	9.48	9.36	9.27	9.62	9.21	9.59	9.41	9.62	9.79	9.28	9.56	10.09	9.87	9.66	8.86	9.29	9.24	9.17	9.41	9.51	9.63	9.4	8.84	8.97	9.14	9.27	9.15	9.88	9.41	9.34
0LaO4r0kuW7ISX6WTI	7.31	7.35	7.31	7.24	7.25	7.69	7.35	7.33	7.32	7.77	7.21	7.29	7.47	7.37	7.46	7.33	7.52	7.43	8.1	8.06	7.49	7.21	7.22	7.2	7.28	7.76	7.27	7.27	8.35	7.25	7.57	7.68	7.27	7.27	7.44	7.5	7.28	7.48	7.47	7.25	7.43	7.19	7.4	7.27	7.79	7.5	7.45	8.06	7.32
0lAtT81QNe3gCiqxPo	8.24	8.21	8.66	8.75	8.83	8.59	8.24	7.99	8.69	9.29	8.47	8.52	8.51	9.8	8.67	8.85	8.82	7.9	7.22	7.38	7.39	7.19	7.2	7.18	7.19	7.78	8.18	7.57	7.33	7.29	7.48	7.65	7.41	7.36	8.29	7.28	8.56	7.89	7.44	7.33	7.61	8.43	9.22	8.62	9.11	7.35	7.22	7.46	7.97
0lB.jRJ1KFLkp6eV38	9.05	8.65	9.47	9.08	8.54	8.97	8.87	8.24	8.56	9.23	8.83	8.15	8.61	8.72	8.81	8.81	8.41	8.59	8.95	8.75	9.08	9.49	8.71	8.62	8.49	9.1	8.99	8.43	8.67	8.96	8.6	8.8	8.35	9.39	9.28	9.03	8.83	9.37	9.15	8.77	9.6	8.81	8.77	8.43	8.68	9.05	9.09	8.44	8.41
0Lbfef5SlHrzE48qhE	7.39	7.33	7.32	7.32	7.34	7.5	7.62	7.41	7.43	7.38	7.37	7.25	7.39	7.4	7.38	7.36	7.33	7.3	7.33	7.77	7.31	7.6	7.51	7.42	7.5	7.34	7.34	7.37	7.36	7.42	7.42	7.35	7.42	7.3	7.4	7.34	7.42	7.33	7.34	7.43	7.36	7.36	7.34	7.26	7.25	7.37	7.43	7.41	7.33
0lD1PzIUXUlLhnWL4o	10.86	10.87	12.31	10.53	10.62	10.87	10.53	10.45	10.93	9.5	10.83	10.97	10.17	10.3	10.23	10.18	10.31	10.26	11.89	11.77	10.62	10.96	11.04	10.99	11.11	11.28	10.54	10.96	10.99	10.95	10.33	11.04	10.7	10.66	10.19	11.28	10.81	10.37	10.91	10.75	10.98	10.86	11.18	10.47	13.47	11.76	11.22	12.05	12.04
0ld6t_VwUtDuQCuNkk	7.17	7.21	7.17	7.13	7.21	7.21	7.21	7.22	7.23	7.25	7.17	7.24	7.22	7.24	7.27	7.22	7.19	7.24	7.25	7.21	7.22	7.2	7.24	7.22	7.21	7.23	7.24	7.27	7.22	7.25	7.19	7.25	7.17	7.26	7.18	7.21	7.2	7.26	7.21	7.29	7.2	7.18	7.3	7.2	7.26	7.3	7.23	7.2	7.19
0lEaClSj.T6eFZ3DOw	9.2	9.65	9.43	8.78	9.2	9.56	9.34	9.21	9.05	9.49	10.29	9.15	9.18	9.57	9.07	8.8	9	10.42	9.44	10.82	9.06	10.51	9.96	9.07	10.2	9.97	9.24	9.6	9.77	9.85	9.62	10.07	10.17	9.48	9.1	9.45	9.64	8.94	9.5	9.54	9.98	9.41	9.46	9.56	8.73	9.25	9.86	9.62	9.76
0leguBAizgIHPAlLdE	7.25	7.26	7.21	7.3	7.31	7.31	7.26	7.33	7.28	7.34	7.27	7.36	7.33	7.27	7.3	7.32	7.27	7.29	7.48	7.41	7.4	7.66	7.57	7.66	7.45	7.4	7.48	7.26	7.41	7.26	7.3	7.39	7.39	7.4	7.27	7.37	7.3	7.4	7.45	7.31	7.31	7.3	7.35	7.27	7.4	7.55	7.51	7.29	7.51
0LF6H_EkVH3r0n53KU	7.19	7.2	7.16	7.15	7.21	7.21	7.3	7.25	7.21	7.2	7.22	7.24	7.2	7.32	7.21	7.16	7.25	7.2	7.21	7.18	7.21	7.21	7.18	7.18	7.19	7.19	7.3	7.26	7.22	7.23	7.23	7.23	7.25	7.19	7.28	7.23	7.19	7.31	7.25	7.22	7.25	7.23	7.16	7.25	7.28	7.17	7.17	7.21	7.32
0lftdPNaVIUCPV01eo	10.77	10.3	9.75	9.59	9.61	10.44	10.19	10.14	9.76	8.75	9.75	9.75	9.28	9.3	9.79	9.54	9.97	11.03	10.63	10.14	9.91	10.02	9.19	9.07	9.58	9.94	9.52	10.09	9.47	10.36	9.61	9.35	9.69	10.03	9.18	9.57	9.15	9.59	9.78	9.89	9.9	8.98	9.25	9.45	9.06	8.85	10.72	9.78	9.71
0lGXmSttqoh44IhhzU	7.44	7.43	7.45	7.41	7.38	7.49	7.51	7.46	7.51	7.46	7.57	7.41	7.61	7.5	7.44	7.46	7.53	7.42	7.45	7.67	7.4	7.65	7.32	7.97	7.5	7.59	7.48	7.72	7.5	7.57	7.63	7.75	7.63	7.54	7.39	7.53	7.49	7.48	7.53	7.52	7.51	7.42	7.4	7.46	7.48	7.36	7.51	7.69	7.5
0lGzddipIhQN0.N.s0	7.16	7.11	7.18	7.09	7.22	7.2	7.21	7.2	7.18	7.11	7.19	7.13	7.12	7.21	7.15	7.17	7.18	7.16	7.14	7.17	7.15	7.15	7.13	7.13	7.17	7.19	7.21	7.2	7.14	7.21	7.19	7.13	7.16	7.2	7.16	7.11	7.15	7.17	7.12	7.2	7.14	7.13	7.19	7.22	7.14	7.12	7.19	7.21	7.21
0lH3lRM1A9TUhFuQEk	7.24	7.12	7.13	7.11	7.15	7.1	7.12	7.14	7.06	7.16	7.1	7.13	7.16	7.12	7.16	7.09	7.19	7.11	7.1	7.16	7.17	7.06	7.06	7.03	7.06	7.08	7.11	7.1	7.13	7.16	7.15	7.1	7.09	7.1	7.16	7.11	7.14	7.09	7.07	7.14	7.1	7.12	7.13	7.14	7.17	7.1	7.11	7.13	7.1
0LH5UrjpXXi4SI6iJs	7.2	7.19	7.2	7.08	7.16	7.32	7.26	7.28	7.24	7.27	7.13	7.16	7.28	7.26	7.31	7.27	7.27	7.21	7.16	7.18	7.24	7.22	7.14	7.1	7.15	7.2	7.26	7.2	7.17	7.23	7.23	7.19	7.33	7.28	7.38	7.33	7.19	7.36	7.24	7.32	7.21	7.24	7.17	7.19	7.31	7.21	7.2	7.19	7.14
0LiIQSOLnSF0kUOjgg	7.11	7.19	7.2	7.13	7.13	7.19	7.13	7.16	7.14	7.15	7.17	7.16	7.2	7.18	7.27	7.11	7.17	7.23	7.24	7.19	7.22	7.2	7.21	7.18	7.19	7.16	7.18	7.22	7.17	7.26	7.22	7.21	7.18	7.15	7.13	7.21	7.14	7.16	7.19	7.26	7.21	7.19	7.17	7.13	7.12	7.13	7.15	7.19	7.2
0LiLogpgNFFPxRTVeU	7.25	7.19	7.36	7.4	7.47	7.43	7.28	7.37	7.48	7.23	7.39	7.32	7.29	7.4	7.38	7.34	7.31	7.43	7.37	7.28	7.45	7.34	7.2	7.2	7.29	7.43	7.39	7.34	7.29	7.33	7.39	7.27	7.35	7.4	7.32	7.38	7.36	7.38	7.41	7.29	7.29	7.46	7.38	7.39	7.35	7.4	7.25	7.36	7.37
0LiSTtclSxYkfLqLJ4	7.25	7.18	7.18	7.19	7.23	7.16	7.21	7.18	7.21	7.22	7.21	7.19	7.23	7.19	7.22	7.21	7.2	7.28	7.18	7.19	7.22	7.17	7.19	7.22	7.21	7.22	7.31	7.25	7.15	7.28	7.28	7.19	7.21	7.35	7.27	7.18	7.23	7.3	7.29	7.23	7.23	7.23	7.25	7.19	7.26	7.23	7.17	7.31	7.32
0lIu6Ci4SRIoIjrUIU	7.22	7.2	7.18	7.14	7.22	7.28	7.2	7.25	7.19	7.14	7.25	7.18	7.18	7.23	7.17	7.16	7.17	7.16	7.3	7.2	7.23	7.18	7.2	7.18	7.2	7.2	7.25	7.22	7.21	7.21	7.21	7.2	7.22	7.25	7.08	7.2	7.18	7.25	7.17	7.23	7.18	7.21	7.22	7.24	7.18	7.15	7.15	7.15	7.23
0lIVAp0O4C9eh0iu0Y	7.16	7.17	7.19	7.22	7.19	7.13	7.17	7.18	7.15	7.11	7.15	7.25	7.14	7.15	7.27	7.2	7.15	7.13	7.14	7.19	7.2	7.19	7.16	7.15	7.17	7.26	7.11	7.17	7.2	7.2	7.19	7.13	7.12	7.16	7.18	7.14	7.19	7.22	7.18	7.16	7.21	7.12	7.16	7.19	7.19	7.14	7.17	7.16	7.14
0LJeZaRiSVmm2t0rpo	7.27	7.2	7.3	7.24	7.29	7.27	7.3	7.18	7.19	7.22	7.22	7.3	7.16	7.36	7.33	7.18	7.29	7.25	7.36	7.23	7.34	7.26	7.24	7.17	7.25	7.26	7.25	7.23	7.24	7.25	7.25	7.22	7.34	7.28	7.19	7.34	7.21	7.29	7.24	7.28	7.31	7.26	7.22	7.24	7.22	7.21	7.28	7.26	7.25
0lJN4gi5WHU.d9cPiE	7.16	7.14	7.12	7.1	7.08	7.12	7.07	7.12	7.21	7.06	7.16	7.13	7.17	7.09	7.18	7.11	7.1	7.13	7.22	7.18	7.18	7.18	7.17	7.15	7.14	7.16	7.1	7.08	7.17	7.07	7.17	7.15	7.12	7.09	7.05	7.09	7.08	7.07	7.11	7.17	7.14	7.13	7.09	7.05	7.15	7.18	7.16	7.12	7.17
0LjtDX3reSGET_LNCk	7.14	7.14	7.18	7.13	7.16	7.26	7.14	7.18	7.18	7.16	7.13	7.18	7.2	7.13	7.23	7.12	7.19	7.16	7.14	7.17	7.16	7.1	7.06	7.05	7.11	7.1	7.17	7.13	7.13	7.19	7.23	7.12	7.18	7.22	7.21	7.09	7.15	7.19	7.13	7.1	7.21	7.25	7.08	7.1	7.22	7.12	7.15	7.18	7.19
0lK1877RTIkECsyp5c	8.55	8.73	8.98	9.59	9.45	9.42	8.79	9.29	8.79	9.78	9.35	8.67	8.71	9.27	9.25	8.73	9.05	8.8	9.41	9.12	8.84	8.47	8.88	8.89	8.6	8.75	9.32	9.17	8.73	8.64	9.08	9.18	8.92	9.08	9.19	9.36	9.18	8.95	9.02	8.86	9.21	9.3	9.96	9.35	8.82	9.43	9.26	8.58	9.11
0lKcunFA_xMiV2Rd88	7.21	7.16	7.16	7.18	7.14	7.15	7.14	7.24	7.11	7.14	7.17	7.1	7.23	7.14	7.12	7.2	7.16	7.16	7.17	7.18	7.2	7.18	7.21	7.19	7.2	7.16	7.2	7.15	7.22	7.21	7.2	7.15	7.12	7.19	7.17	7.2	7.23	7.13	7.21	7.14	7.16	7.09	7.18	7.14	7.11	7.32	7.2	7.18	7.23
0LkFenVe3vjuoLx6eU	7.16	7.2	7.21	7.31	7.31	7.24	7.15	7.22	7.19	7.26	7.2	7.21	7.23	7.21	7.2	7.28	7.28	7.23	7.2	7.18	7.21	7.16	7.18	7.17	7.22	7.17	7.18	7.17	7.17	7.15	7.15	7.2	7.13	7.17	7.21	7.18	7.21	7.14	7.18	7.17	7.11	7.18	7.2	7.19	7.26	7.24	7.25	7.17	7.18
0lKOqeB3Q4_X4fSS6k	7.49	7.43	7.38	7.44	7.38	7.38	7.38	7.36	7.43	7.45	7.41	7.26	7.44	7.4	7.41	7.39	7.42	7.46	7.53	7.48	7.52	7.36	7.56	7.7	7.42	7.45	7.35	7.37	7.34	7.5	7.47	7.47	7.42	7.55	7.44	7.46	7.4	7.32	7.42	7.36	7.48	7.36	7.4	7.35	7.29	7.44	7.42	7.41	7.31
0lKORF.d6KjfkUDFYo	7.29	7.24	7.24	7.3	7.29	7.38	7.35	7.3	7.25	7.25	7.31	7.33	7.26	7.27	7.28	7.29	7.29	7.28	7.26	7.35	7.42	7.53	7.32	7.45	7.45	7.35	7.42	7.27	7.36	7.32	7.36	7.31	7.34	7.32	7.31	7.29	7.31	7.34	7.32	7.42	7.37	7.27	7.37	7.34	7.43	7.24	7.51	7.33	7.37
0lKU5Kg5S1gEeotQLc	9.4	9.28	9.21	9.57	9.94	9.93	9.59	9.56	9.29	9.47	9.62	9.56	9.7	9.26	9.61	9.53	9.46	10.01	9.81	9.45	10.18	9.48	9.23	9.4	9.26	10.18	9.06	9.75	9.2	10	9.44	9.88	9.77	9.29	9.17	9.44	9.02	10.05	9.68	9.47	9.49	9.4	9.39	9.37	10	9.32	10.03	9.86	9.48
0lKXO_iovAxe5NUkmg	7.58	7.66	7.83	7.43	8.17	7.95	7.64	8.28	7.43	7.4	7.91	8.2	7.6	7.9	7.77	7.53	7.66	7.51	8.35	7.97	8.1	7.74	9.18	7.75	8.47	8.67	8.46	8.3	8.36	8.71	8.25	8.6	8.07	7.9	7.9	8.48	8.66	8.04	8.26	8.09	8.06	7.97	7.94	8.02	7.4	8.54	8.17	8.06	8.07
0lLf.0_GVSPVSUbyXE	9.35	9.1	8.66	9.37	9.22	9.13	9.21	9.46	8.78	8.66	9.32	9.43	9.01	8.94	9.02	8.78	8.85	8.8	9.89	9.12	9.38	9.27	9.53	9.19	9.56	9.09	9	9.76	9.85	9.49	9.66	9.74	9.6	9.71	9.06	9.4	9.44	9.21	9.68	9.95	9.67	9.04	8.56	8.78	8.49	9.65	8.91	9.57	9.62
0llN33j3YxRQT5RVZ0	7.25	7.31	7.28	7.28	7.21	7.3	7.3	7.31	7.2	7.31	7.38	7.33	7.21	7.24	7.33	7.4	7.29	7.27	7.23	7.19	7.22	7.38	7.2	7.19	7.3	7.21	7.25	7.27	7.26	7.27	7.3	7.21	7.2	7.23	7.33	7.45	7.3	7.32	7.28	7.23	7.21	7.34	7.34	7.34	7.33	7.18	7.39	7.23	7.33
0lM3d1Uks_YeEnUXo4	7.23	7.23	7.33	7.31	7.27	7.22	7.2	7.22	7.19	7.22	7.17	7.22	7.12	7.26	7.24	7.27	7.2	7.23	7.27	7.23	7.27	7.43	7.24	7.25	7.21	7.21	7.29	7.26	7.34	7.25	7.22	7.21	7.28	7.26	7.19	7.22	7.22	7.25	7.29	7.25	7.22	7.34	7.36	7.26	7.26	7.32	7.5	7.26	7.25
0lmiszqEr500HVBcLU	8.55	9.12	8.6	8.93	9.42	8.49	8.53	9.27	8.59	8.39	9.28	9.64	8.67	9.56	8.94	8.35	8.64	8.29	10.05	9.48	9.38	8.92	9.27	9.27	8.88	8.96	8.58	9.56	9.02	8.95	9.61	9.36	9.45	8.96	8.51	8.99	8.92	8.49	8.88	9.12	9.36	8.53	9.08	8.4	8.79	9.44	9.47	9.2	9.13
0lN.uuIkAo1AVTQhR0	7.19	7.24	7.13	7.12	7.2	7.2	7.25	7.24	7.19	7.18	7.2	7.14	7.26	7.16	7.18	7.16	7.16	7.13	7.18	7.18	7.2	7.14	7.17	7.18	7.19	7.21	7.24	7.16	7.18	7.22	7.21	7.17	7.19	7.21	7.21	7.18	7.19	7.21	7.23	7.2	7.2	7.15	7.18	7.17	7.28	7.15	7.17	7.21	7.25
0lN3jqIq4oDSeDr6Xk	7.29	7.28	7.29	7.26	7.26	7.31	7.3	7.24	7.28	7.24	7.28	7.28	7.28	7.23	7.24	7.25	7.26	7.3	7.36	7.31	7.28	7.29	7.21	7.36	7.26	7.36	7.36	7.31	7.26	7.25	7.28	7.28	7.35	7.36	7.26	7.45	7.27	7.27	7.3	7.31	7.34	7.3	7.26	7.26	7.27	7.29	7.23	7.29	7.29
0Lnh6tJfWoHot7d.S4	9.23	9.33	9.12	9.4	10.11	8.79	8.64	8.99	9.15	8.25	8.7	9.71	8.83	8.67	8.98	9.08	9.13	8.18	9.74	9.17	9.44	9.12	10.39	8.63	10.23	9.04	9.27	9.44	9.77	9.47	10.08	9.07	9.3	8.51	9.4	9.19	9.84	9.34	9.38	9	8.8	8.51	8.5	8.98	9.16	9.79	9.5	9.2	10.11
0lOCeiEgCOFUnXhESA	7.08	7.19	7.23	7.25	7.22	7.22	7.19	7.19	7.22	7.21	7.19	7.23	7.13	7.26	7.26	7.2	7.21	7.24	7.24	7.3	7.25	7.36	7.27	7.18	7.19	7.18	7.23	7.26	7.26	7.26	7.21	7.27	7.22	7.29	7.23	7.3	7.22	7.32	7.17	7.27	7.23	7.2	7.2	7.2	7.18	7.2	7.3	7.2	7.26
0lODsUPku6BrpChe_k	7.26	7.21	7.21	8.74	7.19	7.26	7.2	7.26	7.2	7.23	7.19	7.27	7.22	7.22	7.16	7.27	7.26	7.24	7.21	7.18	7.21	7.17	7.18	7.18	7.18	7.21	7.23	7.18	7.21	7.17	7.13	7.24	7.17	8.44	7.23	7.2	7.2	7.19	7.2	7.22	7.19	7.22	7.23	7.22	7.29	7.28	7.26	7.23	7.25
0loruP36XUkgH68S6U	7.25	7.17	7.26	7.2	7.29	7.16	7.2	7.19	7.23	7.2	7.26	7.25	7.19	7.21	7.28	7.27	7.28	7.22	7.23	7.38	7.21	7.21	7.27	7.26	7.24	7.23	7.39	7.23	7.26	7.2	7.21	7.23	7.22	7.24	7.28	7.18	7.25	7.26	7.23	7.22	7.23	7.2	7.23	7.24	7.2	7.25	7.21	7.25	7.25
0lOtO6RsVzEJ9EiCDo	7.12	7.17	7.13	7.19	7.16	7.13	7.14	7.16	7.16	7.18	7.18	7.17	7.13	7.12	7.18	7.14	7.12	7.18	7.21	7.26	7.24	7.2	7.22	7.2	7.28	7.2	7.14	7.12	7.28	7.18	7.19	7.17	7.16	7.2	7.12	7.33	7.13	7.12	7.17	7.18	7.22	7.18	7.16	7.17	7.21	7.24	7.22	7.22	7.15
0lOwqJTfoJI11JdS0I	7.33	7.3	7.24	7.31	7.53	7.34	7.64	7.83	7.19	7.29	8.13	7.37	7.7	7.48	7.53	7.47	7.38	7.32	7.34	7.23	7.48	9.16	8.36	8.78	9.1	7.68	7.92	7.4	8.61	8.52	7.32	7.55	8.92	7.75	7.61	7.53	8.47	7.83	7.75	8.87	7.36	7.67	7.28	7.76	7.39	7.97	7.67	8	7.99
0lp7cT4YIpJyUoRP1E	7.24	7.21	7.18	7.15	7.15	7.21	7.19	7.21	7.26	7.15	7.21	7.19	7.23	7.19	7.2	7.21	7.17	7.24	7.21	7.19	7.21	7.19	7.23	7.18	7.18	7.16	7.25	7.14	7.21	7.14	7.22	7.23	7.18	7.16	7.2	7.26	7.25	7.16	7.24	7.18	7.18	7.21	7.17	7.33	7.24	7.2	7.27	7.22	7.18
0lppIntaeZrpWqpWpo	7.65	7.71	7.67	7.78	7.71	7.63	7.8	7.68	7.66	7.53	7.68	7.59	7.73	7.6	7.61	7.66	7.71	7.51	7.91	8.07	7.75	8.02	8.32	8.09	7.88	7.83	7.75	8.03	7.79	7.87	7.95	7.79	8.14	7.87	7.72	7.88	7.78	7.72	7.81	7.82	7.86	7.62	7.64	7.61	7.56	7.9	7.92	7.89	7.75
0lQopz3dEN3FSdal5I	7.42	7.22	7.63	7.51	7.38	7.42	7.27	7.27	7.3	7.35	7.38	7.34	7.34	7.31	7.31	7.39	7.39	7.24	7.4	7.52	7.41	7.39	7.22	7.18	7.36	7.39	7.61	7.28	7.21	7.47	7.34	7.24	7.29	7.36	7.4	7.53	7.23	7.4	7.6	7.37	7.36	7.36	7.22	7.39	7.28	7.21	7.27	7.25	7.31
0lQqAgCgp33VSL1U5I	7.45	7.84	7.82	8.26	8.22	8.08	7.39	7.44	8.12	8.45	8.55	8.49	7.41	7.62	7.85	8.49	8.29	8.56	7.8	7.77	7.46	7.82	7.26	7.63	8.15	7.24	7.8	7.43	8.35	7.85	7.77	7.26	7.67	8.25	7.36	8.07	7.6	7.65	7.68	7.78	8.05	7.51	7.67	7.92	7.76	7.83	7.88	7.29	7.64
0lqSPzqpm0acZStWWU	7.3	7.28	7.33	7.32	7.29	7.33	7.32	7.3	7.34	7.33	7.22	7.18	7.26	7.27	7.33	7.25	7.3	7.31	7.25	7.22	7.34	7.2	7.19	7.24	7.22	7.32	7.3	7.31	7.41	7.25	7.27	7.38	7.33	7.32	7.24	7.27	7.29	7.25	7.25	7.34	7.37	7.24	7.19	7.22	7.3	7.24	7.38	7.3	7.24
0LRfIqfV7eSJXjX6rU	7.21	7.14	7.17	7.21	7.18	7.21	7.17	7.19	7.25	7.25	7.28	7.31	7.24	7.18	7.17	7.25	7.27	7.26	7.16	7.2	7.2	7.14	7.19	7.18	7.16	7.22	7.3	7.19	7.21	7.18	7.14	7.2	7.13	7.08	7.19	7.24	7.24	7.15	7.19	7.21	7.15	7.22	7.14	7.15	7.12	7.11	7.16	7.18	7.12
0lRHpfc7q88XdTe3Sc	7.19	7.18	7.16	7.13	7.12	7.17	7.24	7.22	7.15	7.09	7.12	7.12	7.19	7.16	7.14	7.18	7.1	7.11	7.15	7.17	7.19	7.16	7.16	7.16	7.16	7.19	7.15	7.14	7.19	7.01	7.11	7.11	7.16	7.07	7.19	7.18	7.18	7.14	7.12	7.12	7.17	7.1	7.13	7.12	7.21	7.18	7.16	7.14	7.19
0Lrhv10_poK9npHW_s	7.29	7.43	7.31	7.32	7.27	7.35	7.26	7.48	7.61	7.38	7.37	7.41	7.36	7.3	7.43	7.37	7.34	7.23	7.95	8.14	7.44	7.26	7.43	7.35	7.61	7.54	7.42	7.66	7.26	7.38	7.59	7.39	7.36	7.43	7.63	7.77	7.42	7.47	7.83	7.42	7.28	7.32	7.39	7.46	7.42	7.45	7.47	7.37	7.58
0lRqKehIp7JQRDRfx8	7.15	7.16	7.18	7.13	7.18	7.25	7.22	7.29	7.18	7.1	7.19	7.17	7.2	7.19	7.22	7.15	7.17	7.99	7.2	7.2	7.19	7.26	7.18	7.18	7.18	7.13	7.69	7.18	7.14	7.16	7.19	7.2	7.18	7.27	7.19	7.18	7.16	7.18	7.2	7.17	7.35	7.16	7.16	7.11	7.23	7.23	7.21	7.26	7.26
0lS5VUpF.uSaW5ZYhI	7.38	7.26	7.2	7.21	7.31	7.23	7.19	7.4	7.26	7.18	7.25	7.36	7.27	7.28	7.22	7.25	7.39	7.4	7.26	7.31	7.28	7.21	7.56	7.35	8.21	7.28	7.4	7.41	8.15	7.28	7.45	7.32	7.35	7.21	7.27	7.21	7.34	7.28	7.25	7.23	7.29	7.31	7.34	7.24	7.28	7.69	7.31	7.46	7.26
0lsEgje4Io66.kXvXg	8.44	8.32	8.92	8.66	8.97	7.96	8.58	8.11	8.95	8.83	8.06	8.06	8.71	8.71	8.83	9.19	8.93	8.29	7.91	8.12	9.09	9.62	8.25	8.25	8.02	8.7	8.89	8.37	8.41	8.57	8.4	8.2	9.03	8.54	9.16	8.56	8.56	8.58	8.77	8.48	7.91	8.6	8.69	8.69	8.92	8.64	8.73	8.31	8.33
0LSevQpTaid5dQtxX0	7.37	7.2	7.24	7.16	7.4	7.14	7.18	7.37	7.19	7.19	7.31	7.16	7.31	7.19	7.35	7.21	7.17	7.62	7.22	7.25	7.22	7.25	7.17	7.18	7.2	7.23	7.22	7.21	7.2	7.12	7.2	7.27	7.22	7.44	7.14	7.26	7.13	7.23	7.22	7.16	7.21	7.23	7.21	7.15	7.15	7.18	7.19	7.23	7.2
0lSN1mwoOfzjQflMoc	7.55	7.46	7.5	7.63	7.57	7.65	7.47	7.67	7.95	7.52	7.29	7.41	7.43	7.57	8.06	7.49	7.97	7.96	7.33	7.24	7.32	7.62	7.3	7.37	8.02	7.24	7.73	7.3	7.52	7.51	7.4	7.38	7.64	7.5	7.49	7.65	7.65	7.49	7.47	7.5	7.26	7.46	7.66	7.54	7.75	7.5	7.86	7.44	7.5
0Lt45pR09p1Ug9ch6s	11.81	12.72	12.31	11.57	11.92	11.69	12.39	12.5	12.15	12.62	12.35	11.93	12.57	11.96	11.77	12.18	12.13	12.23	12.27	12.74	12.68	13.04	13.54	13.02	13.01	12.19	12.92	12.97	13.03	13.1	12.76	13.11	12.47	12.84	12.53	12.92	13	12.5	12.6	12.45	12.22	12.34	11.85	12.4	11.43	13.04	12.85	12.95	12.59
0lT7FQCqAYlTW7BlNY	7.45	7.35	7.36	7.29	7.35	7.39	7.36	7.42	7.35	7.34	7.29	7.27	7.36	7.39	7.41	7.33	7.43	7.32	7.71	7.44	7.47	7.4	7.67	7.74	7.54	7.36	7.43	7.41	7.32	7.36	7.41	7.38	7.29	7.32	7.39	7.31	7.42	7.26	7.39	7.5	7.34	7.36	7.4	7.34	7.32	7.26	7.52	7.32	7.3
0lto3En9HOq6IbrHSQ	7.5	7.44	7.43	7.33	7.48	7.47	7.41	7.35	7.45	7.52	7.51	7.58	7.48	7.5	7.43	7.52	7.39	7.37	7.85	7.63	7.57	7.91	7.99	7.91	7.61	7.48	7.46	7.49	7.6	7.59	7.65	7.53	7.44	7.62	7.56	7.6	7.43	7.65	7.57	7.62	7.47	7.59	7.65	7.5	7.44	7.49	7.5	7.46	7.64
0LuwBIV0iIFAKTXSEY	7.19	7.15	7.14	7.13	7.13	7.16	7.17	7.12	7.2	7.16	7.18	7.18	7.12	7.12	7.16	7.12	7.14	7.15	7.18	7.19	7.2	7.15	7.16	7.18	7.17	7.15	7.11	7.15	7.16	7.14	7.13	7.1	7.09	7.17	7.16	7.17	7.13	7.14	7.16	7.11	7.1	7.16	7.08	7.2	7.13	7.15	7.19	7.07	7.16
0lVF3l1K3TfUVQA7e0	8.04	7.97	7.75	8.23	7.91	7.63	7.58	7.54	7.6	7.82	7.94	7.89	7.74	7.97	7.58	7.74	7.75	7.87	7.86	7.63	7.64	7.68	7.29	7.94	7.4	7.61	7.48	7.58	7.75	7.5	7.77	7.56	7.72	7.58	7.57	7.6	7.45	7.58	7.45	7.6	7.64	7.52	7.64	7.42	7.79	7.51	8.03	7.41	7.61
0lVJOpRMUFRTokCeP8	8.14	7.73	7.61	7.81	7.55	7.89	7.9	7.86	7.8	7.96	7.87	7.71	7.79	7.75	7.56	7.8	7.61	7.64	7.48	7.96	7.51	7.55	7.85	8.03	7.59	7.69	7.71	7.99	7.83	7.79	7.76	7.84	7.84	7.59	7.92	8.06	7.86	7.85	7.96	8.02	7.8	7.75	7.67	7.67	7.71	7.68	7.81	7.56	7.64
0LVKFITVSHUSOw4LVY	9.48	8.36	7.64	9.03	8.78	8.45	10.03	9.97	8.86	8.17	9.51	10.42	8.98	8.61	8.68	9.26	9.51	7.98	9.07	9.04	9.55	11.16	10.19	10.54	11	10.29	10.33	8.91	11.39	10.58	9.04	8.67	9.57	9.36	9.4	10.74	11.36	10.04	10.67	10.12	9.25	9.43	8.44	10.01	7.81	11.04	9.48	10.3	11.38
0lVMTIuod_g0ohAnFE	7.2	7.23	7.2	7.18	7.17	7.15	7.19	7.14	7.14	7.21	7.21	7.15	7.23	7.16	7.22	7.14	7.14	7.2	7.28	7.21	7.19	7.19	7.2	7.18	7.2	7.18	7.21	7.26	7.33	7.24	7.2	7.29	7.23	7.3	7.3	7.16	7.18	7.21	7.26	7.13	7.21	7.21	7.22	7.28	7.21	7.25	7.22	7.26	7.14
0lWXu.lfUkuFdX3Lfw	10.03	10.24	9.62	9.78	9.19	9.07	10.29	9.15	9.43	8.71	9.13	8.57	8.95	8.5	9.67	9.07	9.15	9.74	9.55	9.09	10.01	9.11	9.26	8.79	8.63	8.43	8.97	9.3	8.89	9.44	9.28	8.56	8.73	8.9	8.88	9.34	8.57	9.2	9.29	9.08	9.22	9.03	8.55	9.07	9.28	9.09	9.64	9.62	10.24
0lXAUVXHlJPslUCB1E	7.21	7.25	7.31	7.27	7.32	7.22	7.3	7.26	7.29	7.27	7.28	7.3	7.2	7.22	7.28	7.22	7.27	7.29	7.28	7.19	7.31	7.2	7.25	7.19	7.2	7.25	7.27	7.23	7.22	7.2	7.25	7.26	7.21	7.23	7.2	7.35	7.23	7.27	7.26	7.25	7.21	7.19	7.23	7.22	7.25	7.28	7.24	7.25	7.19
0LXqh1uXoFeXTe9eUg	9.52	9.05	9.36	9.69	9.39	9.41	8.99	9.02	8.86	8.93	8.98	8.78	8.64	9.17	8.46	9.1	8.83	10.03	9.01	8.57	9.61	9.56	8.96	9.24	9.23	8.88	9.05	9.16	9.41	9.04	8.94	8.43	9.01	9.21	8.88	9	8.76	9.1	9.12	9.42	9.26	9.19	8.7	8.67	8.95	8.88	9.69	8.84	8.98
0lyPjzpe9f4QkXClXo	7.16	7.13	7.18	7.16	7.16	7.15	7.17	7.21	7.2	7.17	7.17	7.08	7.1	7.12	7.07	7.12	7.19	7.17	7.19	7.19	7.24	7.19	7.22	7.17	7.38	7.14	7.13	7.16	7.23	7.12	7.17	7.2	7.12	7.21	7.2	7.21	7.14	7.23	7.14	7.16	7.17	7.17	7.18	7.14	7.11	7.24	7.18	7.18	7.14
0lyr53NO3EvreH14ak	7.23	7.23	7.18	7.33	7.21	7.24	7.27	7.27	7.26	7.1	7.28	7.33	7.26	7.27	7.3	7.23	7.25	7.17	7.24	7.19	7.27	7.25	7.57	7.42	7.29	7.27	7.44	7.29	7.35	7.5	7.28	7.2	7.41	7.28	7.35	7.31	8.09	7.36	7.65	7.55	7.32	7.36	7.23	7.25	7.16	7.74	7.18	7.33	7.5
0Lz8pyjTepJXXnJek4	7.17	7.19	7.21	7.31	7.17	7.13	7.18	7.12	7.16	7.19	7.17	7.21	7.2	7.13	7.12	7.16	7.2	7.14	7.2	7.19	7.21	7.18	7.19	7.17	7.18	7.17	7.1	7.12	7.23	7.12	7.16	7.12	7.17	7.17	7.14	7.16	7.16	7.15	7.18	7.13	7.14	7.09	7.18	7.18	7.16	7.14	7.17	7.19	7.17
0lzjRfk6EkNewE0SLo	10.24	10.38	11.54	10.36	9.95	10.51	10.9	10.7	11	10.64	10.61	10.27	10.48	10.31	10.85	10.6	10.81	10.46	9.47	9.91	9.25	9.35	8.7	9.31	9.54	9.29	10.59	9.76	9.13	9.26	9.3	10.46	9.56	9.8	11.39	9.27	10.53	10.31	9.49	9.33	9.93	10.17	10.69	10.73	10.66	8.78	9.43	9.33	10.06
0m0T1UXsA6iS1OuSV0	7.24	7.24	7.24	7.21	7.26	7.26	7.25	7.29	7.25	7.2	7.42	7.28	7.21	7.24	7.32	7.27	7.24	7.21	7.27	7.23	7.24	7.21	7.2	7.22	7.2	7.22	7.26	7.28	7.27	7.29	7.27	7.29	7.42	7.27	7.24	7.29	7.3	7.33	7.21	7.26	7.27	7.3	7.25	7.27	7.27	7.24	7.26	7.36	7.33
0m3jeiW0X4nOLiAV.k	7.08	7.12	7.12	7.1	7.15	7.11	7.12	7.09	7.13	7.06	7.14	7.13	7.16	7.12	7.09	7.09	7.13	7.17	7.14	7.17	7.17	7.17	7.16	7.1	7.15	7.2	7.17	7.13	7.15	7.17	7.15	7.11	7.1	7.15	7.15	7.12	7.09	7.11	7.12	7.13	7.11	7.12	7.14	7.09	7.15	7.11	7.11	7.11	7.21
0m6Q9VR8REN.eS_dUk	7.42	7.23	7.24	7.26	7.4	7.23	7.35	7.22	7.24	7.29	7.24	7.18	7.36	7.18	7.24	7.19	7.3	7.19	7.18	7.18	7.23	7.29	7.25	7.35	7.26	7.28	7.17	7.37	7.17	7.44	7.24	7.32	7.27	7.28	7.29	7.22	7.34	7.2	7.32	7.33	7.26	7.21	7.2	7.22	7.22	7.24	7.18	7.31	7.16
0M8T1YVQiJFRXSF5XU	7.18	7.32	7.21	7.29	7.27	7.24	7.25	7.28	7.23	7.25	7.27	7.32	7.24	7.24	7.26	7.23	7.25	7.23	7.23	7.2	7.23	7.21	7.24	7.3	7.24	7.2	7.23	7.12	7.38	7.18	7.19	7.19	7.25	7.19	7.18	7.29	7.19	7.23	7.18	7.18	7.17	7.22	7.33	7.23	7.24	7.26	7.3	7.31	7.18
0M_gHajg15UXlXfl5o	8.38	7.47	7.46	7.6	7.43	8.02	8.54	7.4	7.5	7.54	7.37	7.54	8.02	7.28	7.6	7.64	7.69	7.57	7.25	7.3	9.16	8.7	8.36	8.47	7.65	7.22	7.67	8.92	7.61	7.37	8.18	7.35	7.35	7.27	7.6	7.33	7.3	7.27	8.55	7.24	7.27	7.48	7.37	7.4	7.37	7.3	7.41	7.26	8.11
0maZeUplS11lNlRl1c	7.37	7.5	7.46	7.35	7.71	7.42	7.37	7.68	7.5	7.66	7.59	7.59	7.41	7.46	7.63	7.34	7.5	7.34	8.6	7.96	8.18	7.67	8.03	8.07	7.93	8.39	7.72	7.97	7.74	7.88	7.99	8.19	7.79	7.5	7.56	7.75	7.54	7.45	7.67	7.76	7.8	7.51	7.58	7.53	7.41	8.17	7.62	7.99	7.65
0MCF8SI7x20dRFZqWU	7.08	7.14	7.14	7.13	7.13	7.06	7.14	7.14	7.14	7.13	7.14	7.14	7.13	7.22	7.07	7.11	7.15	7.15	7.2	7.19	7.21	7.18	7.19	7.18	7.17	7.09	7.2	7.18	7.21	7.12	7.12	7.1	7.15	7.16	7.04	7.22	7.11	7.08	7.11	7.17	7.1	7.09	7.1	7.18	7.1	7.1	7.14	7.12	7.1
0MDgJR7fXIkpO.rJ6A	7.12	7.17	7.13	7.12	7.17	7.17	7.18	7.15	7.13	7.18	7.13	7.11	7.2	7.08	7.18	7.11	7.18	7.12	7.15	7.17	7.18	7.14	7.15	7.14	7.09	7.13	7.2	7.15	7.14	7.15	7.18	7.09	7.13	7.2	7.15	7.12	7.19	7.12	7.16	7.21	7.15	7.14	7.14	7.14	7.17	7.11	7.14	7.23	7.54
0mdQzboXnv7QIfpfbo	7.45	7.35	7.47	7.24	7.98	7.32	7.17	7.28	7.39	7.67	7.41	7.53	7.31	7.38	7.45	7.37	7.29	7.23	7.58	7.83	7.3	7.19	7.64	7.1	7.18	7.81	7.28	7.73	7.51	7.58	7.32	7.92	7.34	7.42	7.43	7.2	7.44	7.52	7.44	7.35	7.46	7.64	7.92	7.42	8.32	7.5	7.58	7.57	7.64
0meXkuZ3hfd9O7sDew	12.99	11.52	12.4	11.16	11.56	12.12	11.94	11.92	11.61	12.05	11.71	10.68	12.31	11.12	11.48	11.85	12.06	12.66	11.34	12.5	11.73	12.24	12.85	11.75	11.72	11.74	11.67	11.2	11.16	11.77	11.93	12.66	12.66	11.71	11.81	11.64	11.07	12.03	11.57	11.7	11.97	11.24	11.82	12.15	11.1	11.09	11	11.66	11.27
0mglvofxN7eBiSHpLM	7.27	7.61	7.41	7.28	7.4	7.53	7.45	7.52	7.35	7.65	7.44	7.3	7.43	7.6	7.38	7.25	7.24	7.29	7.75	7.65	7.61	7.21	7.43	7.79	7.22	7.69	7.39	7.31	7.38	7.69	7.48	7.46	7.5	7.45	7.6	7.62	7.63	7.54	7.62	7.64	7.51	7.54	7.76	7.68	7.46	7.71	7.39	7.73	7.48
0MGpEP2xGaNqIKFRFo	7.26	7.28	7.33	7.35	7.21	7.41	7.39	7.32	7.23	7.3	7.3	7.29	7.25	7.25	7.33	7.29	7.29	7.28	7.39	7.58	7.32	7.35	7.62	7.96	7.53	7.34	7.32	7.32	7.36	7.31	7.23	7.33	7.4	7.38	7.29	7.29	7.24	7.4	7.33	7.31	7.28	7.27	7.37	7.34	7.31	7.38	7.34	7.24	7.44
0migvRf4uSY6hd.5Yo	7.13	7.18	7.13	7.18	7.2	7.1	7.14	7.15	7.19	7.16	7.19	7.17	7.2	7.17	7.14	7.14	7.13	7.26	7.19	7.18	7.2	7.2	7.19	7.15	7.19	7.16	7.16	7.25	7.24	7.19	7.15	7.15	7.25	7.2	7.15	7.13	7.25	7.12	7.16	7.16	7.1	7.16	7.18	7.13	7.15	7.24	7.22	7.14	7.19
0miRCkLi.ke0lUhbCc	9.47	8.29	7.64	7.87	8.28	9.19	8.59	9.07	8.58	7.44	9	8.55	9.3	8.23	8.25	8.47	8.39	9.23	8	8.06	8.29	9.01	8.1	7.32	8.4	9.36	8.07	8.95	8.06	7.91	9.36	8.97	8.63	7.7	7.67	8.55	8.16	8.75	8.83	8.43	8.61	7.83	7.5	8.26	7.9	8.85	9.32	9.22	8.32
0mj1Ulq8hBelCvBXX8	7.04	7.12	7.05	7.08	7.16	7.12	7.08	7.11	7.11	7.04	7.03	7.03	7.07	7.07	7.1	7.08	7.09	7.09	7.09	7.17	7.17	7.1	7.05	7.09	7.09	7.11	7.06	7.07	7.12	7.07	7.09	7.02	7.04	7.02	7.08	7.09	7.05	7.12	7.13	7.03	7.08	7.08	7.04	7.15	7.1	7.08	7.08	7.09	7.05
0MjBPlNlVFLVdOXepI	7.36	7.39	7.35	7.39	7.37	7.27	7.67	7.63	7.35	7.56	7.47	7.51	7.63	7.33	7.4	7.44	7.5	7.44	7.38	7.23	7.35	8.61	7.54	7.78	8.97	7.34	7.75	7.35	8.06	8.2	7.4	7.32	7.77	7.55	7.32	7.8	8.55	7.46	7.68	7.72	7.28	7.44	7.4	7.45	7.38	7.46	7.7	7.8	7.39
0mLApQiwHUr9VIsGd0	7.13	7.13	7.15	7.15	7.14	7.16	7.23	7.11	7.14	7.09	7.1	7.16	7.11	7.24	7.12	7.15	7.1	7.11	7.17	7.18	7.17	7.11	7.14	7.13	7.17	7.12	7.1	7.09	7.16	7.14	7.15	7.08	7.11	7.1	7.09	7.13	7.09	7.1	7.13	7.07	7.14	7.03	7.16	7.12	7.05	7.13	7.13	7.15	7.2
0moBf3P1Gm0JOKOaE0	7.21	7.27	7.3	7.2	7.25	7.27	7.3	7.25	7.27	7.21	7.33	7.33	7.3	7.22	7.19	7.26	7.28	7.27	7.27	7.37	7.26	7.23	7.3	7.23	7.2	7.27	7.28	7.26	7.23	7.27	7.24	7.22	7.25	7.24	7.27	7.19	7.24	7.29	7.19	7.27	7.27	7.24	7.29	7.21	7.27	7.22	7.17	7.27	7.32
0MQsNHSu6Kf889AM0A	7.21	7.18	7.21	7.2	7.18	7.23	7.24	7.17	7.23	7.22	7.15	7.16	7.14	7.29	7.1	7.16	7.19	7.19	7.16	7.19	7.2	7.22	7.19	7.17	7.2	7.23	7.26	7.21	7.18	7.19	7.22	7.24	7.2	7.15	7.21	7.18	7.17	7.29	7.19	7.24	7.24	7.19	7.23	7.25	7.24	7.17	7.22	7.24	7.19
0mRks6ZUE3H69lJo0s	7.23	7.28	7.25	7.21	7.2	7.25	7.13	7.28	7.34	7.21	7.22	7.22	7.21	7.16	7.23	7.18	7.19	7.23	7.33	7.34	7.31	7.33	7.32	7.79	7.34	7.31	7.17	7.26	7.37	7.22	7.27	7.24	7.29	7.27	7.27	7.42	7.26	7.46	7.28	7.24	7.21	7.25	7.22	7.2	7.18	7.41	7.29	7.28	7.24
0mRTfo.V7AmpgAMypo	7.88	7.78	7.91	7.96	7.83	7.74	7.86	7.8	7.72	7.67	7.83	7.84	7.83	7.71	7.72	7.73	8.04	7.9	7.93	8.11	7.92	8.15	8.07	8.38	8.25	7.75	7.71	7.75	7.93	7.89	7.85	7.73	7.92	7.86	7.71	7.81	7.73	7.62	7.74	7.66	7.78	7.72	7.72	7.83	7.69	7.92	8	7.67	7.71
0mulnda2aYiM1d0._s	7.24	7.24	7.24	7.25	7.29	7.25	7.25	7.26	7.21	7.22	7.22	7.31	7.25	7.26	7.25	7.25	7.2	7.28	7.26	7.44	7.27	7.42	7.27	7.6	7.42	7.25	7.32	7.24	7.32	7.31	7.25	7.24	7.27	7.39	7.26	7.24	7.18	7.21	7.32	7.25	7.24	7.26	7.3	7.3	7.31	7.37	7.26	7.21	7.32
0mYeOoiyqOi2vp.5cQ	7.29	7.35	7.35	7.36	7.32	7.33	7.25	7.28	7.35	7.23	7.33	7.39	7.26	7.19	7.25	7.26	7.24	7.33	7.2	7.18	7.21	7.28	7.19	7.18	7.21	7.25	7.22	7.3	7.18	7.23	7.37	7.22	7.29	7.19	7.29	7.16	7.26	7.25	7.27	7.28	7.26	7.2	7.18	7.22	7.25	7.22	7.18	7.22	7.19
0Myw3E7D.M7Nc8Tr4A	7.27	7.18	7.19	7.24	7.24	7.26	7.2	7.19	7.1	7.18	7.24	7.17	7.17	7.34	7.2	7.18	7.2	7.21	7.16	7.21	7.22	7.18	7.2	7.18	7.21	7.18	7.22	7.18	7.2	7.2	7.2	7.3	7.22	7.27	7.24	7.15	7.21	7.33	7.19	7.2	7.19	7.16	7.16	7.28	7.12	7.15	7.22	7.12	7.16
0n00NE6p6pLiijs.l0	7.3	7.33	7.3	7.24	7.31	7.25	7.36	7.37	7.31	7.27	7.36	7.35	7.26	7.3	7.29	7.33	7.32	7.27	7.46	7.64	7.48	7.53	7.57	7.93	7.42	7.47	7.36	7.28	7.39	7.41	7.42	7.41	7.38	7.31	7.28	7.28	7.36	7.43	7.43	7.42	7.45	7.29	7.32	7.32	7.32	7.43	7.35	7.37	7.51
0n1JtA65JIoRAFXV7k	7.2	7.2	7.22	7.24	7.28	7.16	7.16	7.13	7.24	7.27	7.24	7.27	7.2	7.2	7.18	7.23	7.25	7.21	7.16	7.2	7.18	7.15	7.17	7.17	7.18	7.19	7.17	7.18	7.19	7.16	7.19	7.21	7.18	7.19	7.2	7.17	7.21	7.11	7.2	7.13	7.17	7.19	7.15	7.19	7.17	7.23	7.18	7.23	7.19
0n1Pee10l2Fd97nofU	9.04	8.36	8.17	8.08	7.95	9.05	8.83	8.35	10.33	7.94	8.5	8.08	7.83	8.01	8.85	8.14	8	7.8	9.73	8.79	9.36	8.87	8	8.29	8.06	7.78	8.38	8.57	8.36	8.49	8.47	8.33	8.28	9.18	8.25	8.79	7.88	9.39	8.64	8.43	8.4	8.56	8.74	8.67	10.92	8.93	9.44	8.27	8.43
0n1RxRxQSV0RDON0eo	7.31	7.31	7.33	7.33	7.37	7.27	7.25	7.33	7.38	7.34	7.32	7.37	7.24	7.34	7.35	7.26	7.29	7.29	7.43	7.5	7.46	7.46	7.38	7.79	7.47	7.28	7.31	7.23	7.29	7.32	7.39	7.28	7.33	7.3	7.28	7.23	7.33	7.35	7.45	7.3	7.36	7.3	7.37	7.39	7.45	7.43	7.43	7.4	7.47
0n23.nF.t.6KgJDo6g	7.26	7.3	7.28	7.26	7.24	7.27	7.2	7.38	7.22	7.3	7.27	7.31	7.4	7.32	7.29	7.25	7.24	7.25	7.23	7.28	7.21	7.21	7.2	7.19	7.17	7.24	7.25	7.22	7.23	7.31	7.21	7.23	7.19	7.26	7.27	7.19	7.26	7.19	7.27	7.39	7.29	7.29	7.36	7.29	7.47	7.41	7.23	7.24	7.22
0N3DokG1KoE6lCQ4eU	7.39	7.29	7.32	7.3	7.3	7.29	7.4	7.32	7.33	7.26	7.27	7.32	7.3	7.34	7.36	7.3	7.34	7.31	7.52	7.5	7.49	7.41	7.46	7.35	7.48	7.3	7.35	7.31	7.38	7.31	7.37	7.43	7.34	7.36	7.32	7.38	7.32	7.3	7.3	7.36	7.36	7.28	7.26	7.25	7.3	7.29	7.31	7.27	7.3
0N3SRddpJV2nX3a0Zk	7.13	7.19	7.3	7.3	7.25	7.18	7.19	7.21	7.24	7.23	7.2	7.23	7.24	7.23	7.17	7.23	7.22	7.3	7.22	7.19	7.21	7.19	7.19	7.18	7.2	7.21	7.24	7.25	7.18	7.2	7.16	7.21	7.15	7.2	7.26	7.21	7.22	7.14	7.1	7.18	7.22	7.15	7.21	7.23	7.17	7.18	7.21	7.14	7.27
0n3xe5qJgAnqfQTpK0	9.67	10.67	9.93	9.43	9.32	11.06	10.17	10.62	9.4	9.29	9.82	9.39	9.63	11.16	10.86	9.56	9.84	9.58	9.88	9.8	10.15	10.31	9.7	8.96	9.6	10.16	9.27	10.54	9.33	9.77	10.24	9.91	10.18	9.25	9.31	10.35	8.97	10.02	9.88	9.77	9.56	8.63	9.56	9.89	9.59	9.38	9.87	9.89	9.98
0n4lSify3JeJDMOIdY	7.14	7.2	7.15	7.12	7.29	7.08	7.28	7.06	7.21	7.17	7.27	7.36	7.23	7.1	7.25	7.23	7.2	7.72	7.11	7.16	7.17	7.14	7.12	7.06	7.15	7.14	7.1	7.13	7.15	7.18	7.19	7.24	7.26	7.16	7.13	7.09	7.14	7.13	7.12	7.1	7.17	7.15	7.21	7.16	7.13	7.14	7.09	7.14	7.17
0n56brXL85e.STj6_I	8.28	8.31	7.47	8.44	7.96	7.24	7.36	7.52	7.45	7.61	8.32	7.98	7.29	8.29	7.42	8.22	7.46	7.54	7.83	8.21	8.04	8.56	8.86	8.4	8.32	8.19	8.03	8.01	8.52	8.07	8.49	7.56	8.7	7.59	7.78	7.98	9.18	7.73	8.1	7.78	7.6	7.99	7.75	8.42	7.9	8.85	7.58	8.03	8.86
0n5y0eigKL3w8A4EaU	7.28	7.29	7.21	7.31	7.28	7.3	7.28	7.31	7.29	7.3	7.29	7.27	7.27	7.25	7.36	7.28	7.26	7.23	7.3	7.2	7.33	7.47	7.36	7.82	7.5	7.27	7.37	7.28	7.24	7.3	7.32	7.36	7.27	7.31	7.24	7.3	7.31	7.37	7.3	7.42	7.26	7.22	7.22	7.28	7.4	7.34	7.43	7.39	7.35
0n6V95244r3eVmufv8	7.26	7.27	7.42	7.27	7.27	7.26	7.28	7.25	7.41	7.22	7.35	7.26	7.29	7.32	7.32	7.26	7.27	7.58	7.19	7.18	7.25	7.3	7.21	7.18	7.23	7.26	7.31	7.21	7.2	7.27	7.23	7.22	7.25	7.18	7.16	7.32	7.25	7.42	7.31	7.3	7.28	7.22	7.29	7.29	7.38	7.22	7.22	7.23	7.29
0N6VfLhKKS.5VIKVYc	7.5	7.55	7.51	7.59	7.56	7.81	7.74	7.6	7.65	7.6	7.61	7.62	7.69	7.58	7.51	7.5	7.7	7.59	7.73	7.95	7.72	7.9	7.74	8.12	7.84	7.62	7.66	7.69	7.77	7.65	7.78	7.85	7.69	7.82	7.59	7.59	7.53	7.86	7.66	7.7	7.72	7.5	7.55	7.56	7.56	7.63	7.64	7.75	7.84
0N70r67FuwLqjqsAus	9.69	9.82	10	10.42	10.92	9.73	10.03	9.58	9.82	10.11	9.78	10.1	9.96	10.14	10.28	10.53	10.75	10.87	8.86	9.27	9.2	9.73	9.19	9.36	9.54	9.57	9.97	10.01	9.51	9.54	9.58	9.59	9.44	9.68	9.81	9.13	10.21	9.52	9.44	9.3	9.53	10.12	10.62	10.18	10.42	9.29	9.9	9.2	9.61
0n7fEd5UASrTuTdLok	7.17	7.2	7.24	7.25	7.23	7.26	7.25	7.26	7.23	7.31	7.29	7.24	7.19	7.21	7.14	7.24	7.22	7.21	7.32	7.24	7.31	7.23	7.38	7.47	7.24	7.24	7.28	7.21	7.33	7.23	7.3	7.23	7.21	7.34	7.22	7.27	7.22	7.25	7.2	7.21	7.21	7.24	7.2	7.21	7.19	7.2	7.22	7.2	7.24
0N_dK6StSaAuN5NVAI	12.18	11.74	11.83	12.06	11.03	11.85	11.79	11.75	10.74	11.64	11.82	13.08	11.73	11.57	11.81	11.62	11.67	11.75	12.3	11.93	11.39	12.06	12.5	12.23	12.18	11.86	11.83	12.43	12.37	12.2	12.36	12.1	12.64	11.53	12.03	12.06	12.23	11.96	12.35	11.92	11.92	11.4	11.31	11.73	11.03	12.39	11.92	11.98	12.22
0nBUwHnqkANN_gp3gU	7.45	7.39	7.35	7.38	7.41	7.39	7.49	7.37	7.34	7.38	7.4	7.3	7.48	7.39	7.37	7.36	7.48	7.4	7.45	7.42	7.4	7.22	7.27	7.18	7.3	7.43	7.36	7.43	7.24	7.35	7.41	7.41	7.4	7.37	7.44	7.33	7.4	7.37	7.38	7.39	7.35	7.46	7.36	7.31	7.34	7.24	7.29	7.42	7.32
0Ndp5_8kiAodF8uuHo	7.14	7.16	7.12	7.19	7.17	7.16	7.21	7.32	7.22	7.17	7.13	7.3	7.16	7.13	7.43	7.15	7.12	7.33	7.18	7.2	7.21	7.18	7.18	7.18	7.19	7.13	7.2	7.23	7.2	7.16	7.17	7.16	7.13	7.23	7.19	7.21	7.18	7.14	7.17	7.22	7.29	7.14	7.23	7.2	7.19	7.17	7.15	7.26	7.12
0nDx8Rf.qArl6BSuUk	7.12	7.1	7.13	7.17	7.15	7.09	7.09	7.17	7.14	7.13	7.12	7.09	7.2	7.11	7.08	7.1	7.14	7.14	7.13	7.17	7.16	7.15	7.15	7.16	7.13	7.06	7.11	7.09	7.12	7.07	7.16	7.12	7.06	7.14	7.11	7.12	7.15	7.17	7.08	7.13	7.18	7.09	7.2	7.04	7.11	7.09	7.08	7.13	7.14
0ne9BQNU8_0oinekh8	7.14	7.13	7.17	7.19	7.19	7.22	7.22	7.17	7.17	7.17	7.14	7.15	7.17	7.14	7.23	7.16	7.1	7.16	7.2	7.19	7.23	7.2	7.21	7.46	7.22	7.11	7.16	7.14	7.24	7.16	7.14	7.23	7.18	7.11	7.14	7.17	7.11	7.17	7.14	7.12	7.2	7.18	7.21	7.15	7.23	7.29	7.21	7.12	7.31
0NEB6SCqrqV90B3t3I	7.51	7.38	7.4	7.36	7.39	7.4	7.42	7.41	7.41	7.37	7.55	7.33	7.51	7.36	7.43	7.37	7.42	7.39	7.5	7.99	7.66	7.73	7.79	7.68	7.78	7.55	7.39	7.63	7.43	7.59	7.64	7.74	7.64	7.78	7.41	7.67	7.41	7.45	7.59	7.54	7.63	7.42	7.36	7.45	7.37	7.43	7.61	7.56	7.36
0NeIOq.gKCuKnulXoY	7.31	7.23	7.28	7.42	7.59	7.26	7.23	7.56	7.27	7.21	7.25	7.47	7.27	7.21	7.48	7.31	7.24	7.23	7.41	7.18	7.52	7.2	7.2	7.15	7.2	7.27	7.18	7.29	7.33	7.32	7.28	7.3	7.24	7.52	7.29	7.17	7.21	7.42	7.31	7.37	7.29	7.31	7.24	7.17	7.28	7.34	7.46	7.61	7.23
0nEpSgUiVNN0ilXo7U	7.13	7.15	7.11	7.1	7.16	7.19	7.13	7.33	7.2	7.18	7.13	7.06	7.22	7.08	7.14	7.18	7.22	7.27	7.15	7.17	7.16	7.14	7.08	7.09	7.13	7.1	7.17	7.09	7.16	7.09	7.14	7.12	7.12	7.15	7.11	7.12	7.16	7.18	7.15	7.15	7.23	7.22	7.11	7.16	7.2	7.1	7.12	7.13	7.11
0neV5Ae1Kdd5Xep_.0	7.48	7.36	7.38	7.36	7.34	7.44	7.33	7.4	7.45	7.55	7.31	7.44	7.23	7.4	7.41	7.35	7.34	7.47	7.7	7.67	7.63	7.44	8.17	7.55	7.87	7.25	7.36	7.27	7.94	7.4	7.53	7.55	8	7.45	7.54	7.77	7.45	7.76	7.56	7.6	7.34	7.34	7.32	7.35	7.32	7.8	7.43	7.52	7.58
0nezyAlXSB6gpSsHcs	10.71	9.68	8.53	9.82	9.42	9.59	9.14	11.27	8.37	9.39	11.95	10.7	9.35	10.57	8.03	10.6	11.05	8.47	8.95	10.28	8.36	9.93	11.8	11.43	9.32	9.84	10.12	10.47	9.67	9.67	9.76	8.75	10.07	8.83	9.07	10.65	11.96	9.72	10.96	9.51	10.57	10.3	8.15	12.88	8.79	9.64	8.82	12.14	9.68
0nF3h8e6nqAU.ARxRk	7.2	7.22	7.19	7.28	7.16	7.26	7.22	7.22	7.19	7.18	7.21	7.22	7.28	7.17	7.26	7.25	7.28	7.24	7.19	7.23	7.23	7.29	7.28	7.17	7.18	7.14	7.26	7.18	7.21	7.2	7.37	7.24	7.2	7.36	7.18	7.29	7.27	7.16	7.29	7.3	7.19	7.21	7.25	7.38	7.17	7.21	7.22	7.36	7.24
0nf7FXX6.O9euNq76s	7.28	7.3	7.22	7.34	7.29	7.37	7.26	7.35	7.29	7.29	7.27	7.44	7.3	7.29	7.35	7.33	7.36	7.39	7.61	7.39	7.39	7.57	7.59	7.37	7.25	7.27	7.32	7.23	7.4	7.26	7.29	7.29	7.25	7.25	7.32	7.53	7.38	7.22	7.24	7.32	7.27	7.29	7.34	7.32	7.38	7.43	7.33	7.31	7.26
0nF7rjdku6ojstSECE	10.58	10.46	10.89	10.41	10.57	10.06	9.72	9.37	10.51	11.36	11.37	11.04	9.76	10.65	10.14	10	10.1	9.9	10.85	10.55	10.56	10.05	10.14	9.63	10.22	11.29	10.4	10.74	10.34	10.64	10.42	11.16	11.22	10.44	10.45	10.48	10.14	9.86	10.25	9.95	10.31	9.6	10.53	10.48	11.03	10.5	10.57	10.47	10.94
0nfnuOp8TrKqSMCqwk	7.39	7.38	7.29	7.38	7.27	7.46	7.28	7.41	7.36	7.38	7.39	7.31	7.25	7.26	7.3	7.42	7.3	7.38	7.41	7.57	7.38	7.62	7.44	7.6	7.63	7.46	7.3	7.39	7.4	7.42	7.34	7.36	7.43	7.43	7.34	7.31	7.39	7.34	7.41	7.42	7.39	7.34	7.4	7.42	7.28	7.38	7.54	7.42	7.37
0NFSaWlOOqVJd0i530	7.34	7.29	7.35	7.26	7.24	7.31	7.4	7.39	7.22	7.31	7.32	7.24	7.34	7.26	7.36	7.32	7.36	7.22	7.27	7.2	7.42	7.2	7.2	7.22	7.21	7.39	7.3	7.29	7.19	7.33	7.3	7.4	7.35	7.29	7.32	7.33	7.34	7.39	7.33	7.35	7.34	7.32	7.18	7.28	7.18	7.29	7.3	7.35	7.36
0nggqIofoo5KgiKpEI	7.44	7.31	7.45	7.46	7.48	7.43	7.35	7.41	7.35	7.42	7.37	7.53	7.5	7.52	7.45	7.47	7.43	7.38	7.64	7.49	7.38	7.36	7.31	7.41	7.45	7.39	7.33	7.32	7.44	7.4	7.32	7.41	7.36	7.38	7.44	7.29	7.5	7.39	7.34	7.29	7.36	7.45	7.54	7.41	7.35	7.42	7.29	7.41	7.56
0ngUQUEe3XndegYUK4	7.29	7.33	7.32	7.31	7.33	7.27	7.29	7.33	7.28	7.47	7.28	7.39	7.33	7.31	7.26	7.36	7.3	7.39	7.37	7.56	7.41	7.35	7.34	7.21	7.51	7.34	7.28	7.28	7.55	7.33	7.35	7.3	7.32	7.25	7.4	7.66	7.38	7.37	7.24	7.33	7.29	7.34	7.45	7.37	7.38	7.47	7.51	7.27	7.4
0nhgETpCMie1ylcAdk	7.15	7.18	7.13	7.23	7.18	7.33	7.27	7.1	7.14	7.2	7.19	7.23	7.25	7.12	7.16	7.51	7.21	7.24	7.15	7.18	7.17	7.19	7.11	7.04	7.12	7.13	7.14	7.15	7.14	7.15	7.11	7.16	7.12	7.04	7.3	7.11	7.18	7.12	7.14	7.08	7.12	7.27	7.13	7.26	7.57	7.13	7.12	7.14	7.03
0nhUk0lEd6voA7_Xvo	9.24	8.09	9.44	8.72	10.47	9.91	10.16	11.1	9.42	9.49	9.94	11.69	10.25	9.14	9.29	10.66	10.23	8.3	9.12	10.9	9.81	10.32	12.14	9.35	10.73	10.03	11.08	8.99	12.95	10.68	8.33	10.68	9.43	10.38	11.18	10.9	11.35	12.45	9.98	9.72	10.34	10.34	10.78	8.83	8.72	11.89	10.15	10.66	10.44
0nhwoprp398E9UblSo	8.67	10.79	8.81	8.96	10.64	8.31	8.99	8.66	8.99	8.85	8.61	8.81	8.64	8.61	8.71	8.75	8.37	10.39	8.81	9.06	9.3	9.25	9.5	8.57	8.7	8.44	8.79	8.73	9.95	9.47	8.98	8.84	9.41	9.4	8.59	9.49	8.96	9.5	8.98	9.04	9.39	8.7	8.41	8.37	8.86	9.2	9.77	9.1	9.79
0nIR_gDjgQBJuxXfok	7.19	7.13	7.15	7.16	7.11	7.14	7.17	7.14	7.13	7.18	7.19	7.09	7.1	7.2	7.12	7.12	7.15	7.18	7.2	7.18	7.2	7.21	7.16	7.18	7.21	7.22	7.13	7.15	7.24	7.17	7.1	7.24	7.22	7.2	7.17	7.19	7.19	7.22	7.15	7.16	7.18	7.13	7.2	7.13	7.16	7.23	7.18	7.08	7.18
0niX00Xdt6PHuMl76Q	7.19	7.18	7.18	7.2	7.19	7.13	7.21	7.14	7.18	7.19	7.14	7.18	7.1	7.16	7.2	7.24	7.19	7.25	7.18	7.19	7.26	7.19	7.19	7.18	7.19	7.17	7.13	7.2	7.31	7.14	7.18	7.14	7.08	7.17	7.13	7.22	7.16	7.21	7.18	7.22	7.15	7.16	7.18	7.22	7.21	7.16	7.23	7.08	7.2
0niXHt19Ue1.dSldI4	11.54	11.23	11.68	10.72	11.49	10.65	11.77	11.47	12	12.27	10.35	11.76	11.59	11.74	11.07	11.83	11.34	11.88	11.49	11.33	11.63	11.62	12.4	11.45	12.02	11.99	10.79	11.56	11.72	12.01	11.78	10.85	11.34	10.81	11.72	11.81	11.06	11.49	11.36	11.82	11.46	11.36	11.52	11.6	10.98	11.57	11.22	11.64	11.58
0NJAEt44A6op5c43lI	7.32	7.28	7.3	7.29	7.28	7.26	7.34	7.34	7.23	7.24	7.28	7.26	7.24	7.34	7.31	7.34	7.34	7.27	7.27	7.24	7.25	7.19	7.26	7.19	7.2	7.25	7.23	7.26	7.36	7.25	7.34	7.26	7.29	7.22	7.32	7.29	7.31	7.25	7.26	7.25	7.26	7.31	7.2	7.2	7.21	7.24	7.32	7.35	7.32
0njqXcr7_a.qjHiBJk	7.34	7.24	7.33	7.21	7.21	7.41	7.27	7.32	7.26	7.34	7.33	7.28	7.3	7.3	7.25	7.31	7.26	7.39	7.21	7.19	7.21	7.2	7.2	7.18	7.2	7.36	7.22	7.32	7.19	7.27	7.3	7.32	7.27	7.26	7.36	7.23	7.25	7.21	7.31	7.27	7.26	7.19	7.16	7.26	7.35	7.16	7.22	7.28	7.21
0njZQvDiTfagUokRrQ	7.12	7.18	7.17	7.15	7.08	7.1	7.14	7.15	7.08	7.04	7.11	7.17	7.14	7.12	7.13	7.09	7.16	7.14	7.16	7.2	7.21	7.15	7.19	7.16	7.18	7.14	7.1	7.07	7.2	7.16	7.14	7.11	7.15	7.11	7.13	7.2	7.15	7.06	7.1	7.15	7.1	7.05	7.11	7.11	7.08	7.18	7.14	7.13	7.1
0nk_YoVID0x65Rv19U	7.88	7.95	7.86	8.29	7.89	7.82	7.6	7.95	8.51	7.85	7.9	8.36	7.78	8.44	7.84	8.29	8.27	7.8	8.62	8.25	8.44	7.83	8.02	8.15	8.24	8.02	8.01	8.78	8.34	7.89	8.44	8.17	8.5	8.71	8.46	8.33	8.08	8.42	8.08	7.98	8.39	7.88	7.91	8.29	8.09	8.33	8.25	7.81	8.45
0nKJ6oioIMuLk5w4t4	7.59	7.54	7.58	7.57	7.6	7.57	7.49	7.61	7.55	7.61	7.61	7.67	7.55	7.64	7.5	7.51	7.47	7.58	7.81	7.99	7.84	8.01	8.16	8.15	8.11	7.53	7.65	7.66	7.83	7.62	7.69	7.68	7.59	7.8	7.48	7.7	7.54	7.56	7.55	7.66	7.57	7.58	7.9	7.6	7.72	7.71	7.84	7.56	7.55
0nkX1XlUjHshHugQIU	7.26	7.37	7.36	7.42	7.38	7.37	7.31	7.39	7.43	7.37	7.4	7.33	7.31	7.4	7.28	7.43	7.47	7.45	7.27	7.19	7.34	7.2	7.22	7.22	7.27	7.25	7.29	7.35	7.44	7.3	7.4	7.25	7.31	7.27	7.29	7.39	7.35	7.28	7.29	7.29	7.31	7.29	7.38	7.31	7.32	7.28	7.22	7.27	7.27
0nl1UhNV3UK0K0ie0g	7.27	7.3	7.33	7.38	7.34	7.32	7.34	7.33	7.37	7.38	7.41	7.4	7.26	7.39	7.27	7.36	7.36	7.41	7.32	7.49	7.28	7.42	7.29	7.44	7.33	7.28	7.3	7.29	7.55	7.32	7.32	7.33	7.36	7.37	7.31	7.35	7.36	7.34	7.31	7.32	7.35	7.31	7.32	7.31	7.38	7.35	7.32	7.28	7.29
0nL9XoiKXJQQYKho.w	8.43	9.2	7.9	7.92	7.46	8.87	8.24	8.06	8.31	9.45	8.36	8.7	8.9	9.12	8.11	8.54	8.8	8.24	8.75	8.8	9.39	7.37	8.35	7.39	8.41	8.82	9.24	8.96	8.8	8.82	8.39	9.02	9.21	8.67	9.26	8.73	9.03	8.57	8.48	8.03	8.61	7.92	8.61	8.3	9.24	8.23	9.58	9.36	8.81
0NN33uIdVaxyJ_7uSE	7.23	7.22	7.15	7.25	7.26	7.27	7.29	7.2	7.22	7.24	7.34	7.24	7.23	7.14	7.2	7.26	7.19	7.3	7.29	7.42	7.28	7.24	7.35	7.18	7.26	7.23	7.16	7.23	7.35	7.21	7.21	7.21	7.19	7.27	7.18	7.23	7.18	7.18	7.27	7.2	7.17	7.24	7.16	7.26	7.15	7.22	7.25	7.18	7.22
0nNDpLkVahe.hOCV9g	8.28	7.85	7.96	7.87	8.31	8.89	7.54	8.7	8.01	8.18	7.44	7.86	8.24	7.76	7.76	7.75	7.84	7.57	8.77	8.04	8.36	7.53	8.86	7.18	7.61	8.67	8	8.53	8.91	8.11	8.37	8.68	8.63	7.67	8.36	8.96	7.94	9.3	8.42	8.2	8	7.78	7.84	7.68	7.42	8.42	8.47	8.02	8.19
0nnlAgB4iUUQhwsCFg	7.35	7.33	7.39	7.39	7.35	7.38	7.41	7.33	7.35	7.42	7.38	7.45	7.47	7.37	7.3	7.44	7.34	7.44	7.65	7.74	7.52	7.75	7.7	8.13	7.6	7.53	7.45	7.31	7.57	7.34	7.43	7.56	7.5	7.4	7.36	7.55	7.4	7.51	7.56	7.38	7.36	7.42	7.37	7.4	7.37	7.55	7.54	7.38	7.57
0nnOO9ZJ4F0NEhAcuU	7.3	7.37	7.28	7.35	7.34	7.43	7.49	7.41	7.34	7.37	7.42	7.3	7.38	7.49	7.42	7.37	7.41	7.45	7.52	7.57	7.45	7.57	7.5	7.61	7.71	7.44	7.41	7.4	7.37	7.5	7.49	7.47	7.49	7.56	7.38	7.24	7.41	7.52	7.44	7.52	7.54	7.42	7.39	7.41	7.45	7.57	7.47	7.46	7.51
0noHct3OeX0nfLXfpM	7.21	7.22	7.21	7.2	7.19	7.25	7.2	7.19	7.21	7.18	7.27	7.21	7.19	7.21	7.23	7.24	7.17	7.24	7.25	7.2	7.22	7.22	7.21	7.24	7.22	7.21	7.26	7.23	7.21	7.3	7.19	7.24	7.22	7.24	7.18	7.24	7.22	7.25	7.27	7.32	7.23	7.24	7.27	7.19	7.15	7.21	7.37	7.24	7.16
0nooP_0HFReqOCdHpQ	7.27	7.26	7.27	7.18	7.27	7.31	7.22	7.3	7.3	7.21	7.3	7.24	7.27	7.17	7.24	7.26	7.26	7.24	7.34	7.23	7.32	7.22	7.2	7.17	7.2	7.26	7.26	7.24	7.15	7.27	7.28	7.23	7.23	7.28	7.3	7.2	7.2	7.16	7.26	7.26	7.32	7.15	7.15	7.27	7.26	7.25	7.21	7.25	7.2
0nOQOSfUhC1XKR1fVA	7.24	7.29	7.2	7.27	7.26	7.19	7.14	7.19	7.3	7.29	7.31	7.31	7.24	7.35	7.29	7.27	7.22	7.34	7.16	7.19	7.22	7.22	7.2	7.17	7.2	7.2	7.2	7.17	7.25	7.28	7.27	7.2	7.22	7.28	7.22	7.2	7.16	7.22	7.23	7.21	7.28	7.18	7.18	7.34	7.3	7.35	7.21	7.26	7.31
0npJaZSl5JKiJBCV6U	7.53	7.7	7.68	7.39	7.53	7.49	7.29	7.56	7.43	7.53	7.53	8.02	7.65	7.76	7.52	7.35	7.4	7.44	7.38	7.48	7.53	7.66	7.67	7.7	7.71	7.79	7.55	7.94	7.51	7.63	7.77	8.28	7.74	7.58	7.48	7.69	7.51	7.6	7.56	7.87	7.59	7.68	7.44	7.64	7.47	7.62	7.66	7.41	7.77
0npN315PSff1ismeMU	7.21	7.26	7.23	7.31	7.17	7.21	7.18	7.22	7.19	7.21	7.19	7.12	7.22	7.28	7.22	7.21	7.21	7.16	7.26	7.27	7.37	7.21	7.2	7.37	7.23	7.22	7.28	7.22	7.36	7.23	7.23	7.16	7.19	7.28	7.31	7.22	7.27	7.21	7.2	7.26	7.31	7.24	7.31	7.2	7.27	7.23	7.19	7.23	7.18
0npQlEveGeEMCgcNdE	7.23	7.22	7.26	7.22	7.29	7.24	7.2	7.15	7.23	7.25	7.28	7.21	7.29	7.21	7.28	7.2	7.23	7.27	7.21	7.2	7.2	7.18	7.19	7.16	7.19	7.24	7.12	7.25	7.15	7.2	7.24	7.2	7.25	7.29	7.23	7.18	7.21	7.19	7.17	7.17	7.27	7.17	7.14	7.2	7.4	7.19	7.21	7.27	7.18
0npTVWFFUER1K3RE.A	7.2	7.25	7.24	7.22	7.25	7.22	7.19	7.26	7.16	7.23	7.28	7.38	7.18	7.24	7.2	7.19	7.24	7.27	7.19	7.22	7.21	7.35	7.26	7.28	7.2	7.19	7.35	7.18	7.19	7.25	7.21	7.22	7.15	7.23	7.15	7.24	7.11	7.13	7.27	7.2	7.24	7.15	7.28	7.3	7.28	7.27	7.25	7.24	7.23
0nq.nRd4Z4eYD4guoI	8.77	10.19	10.07	8.64	9.07	10.67	8.91	9.82	9.49	10.73	9.76	9.63	9.04	10.13	10.18	9.42	9.25	10.28	10.19	9.77	9.94	8.77	8.13	8.83	9.16	9.32	10.76	9.42	10.44	9.84	10.08	9.81	10.33	9.75	10.02	9.6	9.58	9.85	10.19	9.17	10.34	9.74	9.96	10.56	9.26	10.03	10.2	10.03	9.84
0nqNf4qQkhX31J2h7g	7.32	7.48	7.33	7.3	7.54	7.28	7.36	7.35	7.45	7.45	7.34	7.36	7.28	7.39	7.4	7.31	7.32	7.23	7.53	7.27	7.63	7.21	7.25	7.98	7.33	7.57	7.31	7.52	7.32	7.68	7.49	7.4	7.33	7.67	7.68	7.77	7.39	7.66	7.26	7.45	8.13	7.39	7.22	7.51	7.37	7.29	7.28	7.4	7.3
0NQvuTpLAqiXoJN3pI	7.38	7.28	7.34	7.33	7.33	7.48	7.33	7.28	7.33	7.61	7.65	7.77	7.31	7.33	7.31	7.33	7.3	7.41	7.34	7.19	7.27	7.52	7.32	7.27	7.3	7.61	7.22	7.74	7.38	7.34	7.27	7.37	7.39	7.3	7.31	7.37	7.31	7.31	7.36	7.28	7.36	7.39	7.23	7.36	7.24	7.34	7.2	7.39	7.79
0nR8QAyjjgvyJMKSn0	7.16	7.11	7.12	7.11	7.25	7.18	7.18	7.15	7.1	7.14	7.08	7.15	7.18	7.12	7.15	7.08	7.18	7.11	7.14	7.17	7.19	7.14	7.14	7.12	7.12	7.09	7.15	7.12	7.16	7.16	7.12	7.09	7.12	7.09	7.15	7.13	7.24	7.16	7.1	7.17	7.14	7.21	7.21	7.15	7.21	7.14	7.15	7.13	7.17
0NRagB_n2_WX6RFLhE	7.16	7.22	7.13	7.18	7.18	7.16	7.13	7.12	7.13	7.14	7.19	7.11	7.13	7.15	7.26	7.12	7.13	7.09	7.27	7.19	7.23	7.3	7.22	7.29	7.34	7.17	7.14	7.18	7.3	7.15	7.2	7.15	7.21	7.19	7.14	7.21	7.06	7.17	7.14	7.17	7.17	7.11	7.17	7.21	7.19	7.18	7.17	7.08	7.06
0nrEk5JPAUMEeFHKvk	7.04	7.13	7.06	7.05	7.05	7.06	7.07	7.06	7.06	7.1	7.01	7.03	7.05	7.1	7.15	7.02	7	7.05	7.14	7.15	7.18	7.1	7.12	7.12	7.07	7.04	7.03	7.07	7.17	7.06	7.07	7.04	7.11	7.08	7.03	7.13	7.05	7.09	7.13	7.05	7.03	7.07	7.12	7.05	7.08	7.13	7.11	7.08	7.05
0NSEki3_rGqCnpKqEc	7.44	7.42	7.42	7.42	7.43	7.43	7.41	7.37	7.44	7.39	7.42	7.27	7.28	7.37	7.45	7.38	7.44	7.35	7.41	7.55	7.42	7.43	7.42	7.74	7.39	7.49	7.37	7.49	7.32	7.49	7.57	7.45	7.42	7.52	7.36	7.34	7.37	7.48	7.42	7.52	7.53	7.38	7.26	7.37	7.31	7.34	7.38	7.51	7.39
0nSICV6S4EB1fTh5F4	7.19	7.34	7.21	7.29	7.3	7.26	7.25	7.27	7.28	7.29	7.37	7.37	7.26	7.3	7.29	7.3	7.26	7.27	7.43	7.36	7.24	7.49	7.41	7.53	7.23	7.28	7.31	7.27	7.34	7.3	7.37	7.26	7.29	7.31	7.3	7.29	7.29	7.3	7.29	7.25	7.31	7.29	7.3	7.25	7.27	7.32	7.37	7.33	7.22
0ntKIeuAEd2nkJTseQ	7.26	7.76	7.7	7.32	7.43	7.6	7.85	7.65	8.1	8.01	7.58	7.22	7.52	7.3	7.82	7.62	7.37	7.54	7.23	7.32	7.75	7.45	7.59	7.17	7.24	7.21	7.13	7.13	7.24	7.35	7.14	7.26	7.32	7.24	7.6	7.44	7.37	7.47	7.17	7.53	7.21	7.55	7.68	7.61	7.82	7.23	7.19	7.38	7.12
0ntSpFJg55Fb36TNNc	7.18	7.19	7.17	7.19	7.2	7.22	7.21	7.18	7.23	7.22	7.23	7.28	7.24	7.19	7.21	7.24	7.24	7.19	7.24	7.19	7.19	7.2	7.19	7.17	7.24	7.16	7.17	7.14	7.2	7.12	7.21	7.17	7.21	7.18	7.13	7.16	7.19	7.25	7.22	7.12	7.19	7.2	7.18	7.12	7.16	7.23	7.22	7.22	7.13
0nU0rkqj_ngpuTP16k	11.84	11.57	11.41	10.95	10.89	10.7	11.2	11.33	10.44	10.83	10.66	11.08	11.3	10.72	10.45	11.17	12.68	11.47	11.35	11.33	11.18	10.69	11.35	11.46	11.59	10.79	10.89	11.28	11.82	11.12	11.47	11.94	11	11.08	11.4	11.16	10.94	10.9	11.82	11.21	11.06	10.91	11.15	10.38	10.65	10.91	11.55	11.18	11.7
0nu9VB3veZGASze.ik	9.14	9.22	10.23	9.68	10.88	9.34	8.85	9.01	9.29	10.53	9.34	8.56	8.91	9.44	9.61	9.24	9.2	8.48	9.69	9.66	9.77	8.53	9.27	8.85	8.64	10.08	9.32	10.41	8.43	9.22	9.66	10.21	9.41	8.89	9.15	8.47	8.94	8.94	8.65	8.69	9.38	9.36	10.4	8.84	9.61	9.54	9.01	8.93	8.96
0nugSujcjkgj.5ITko	7.05	7.09	7.09	7.04	7.06	7.03	7.12	7.05	7.05	7.02	7.05	7.09	7.15	7.06	7.05	6.99	7.04	7.06	7.12	7.17	7.16	7	7.08	7.02	7.02	6.99	7.08	7.06	7.11	7.02	7.12	7.11	7.08	7.09	7.07	7.09	7.09	7.06	7.05	7.03	7.08	7.07	7.06	7.12	7.12	7.06	7.1	7.04	7.05
0nunX1weqf34Tsr5_s	8.49	8.35	8.11	8.66	8.38	9.07	8.42	8.28	9	7.91	8.42	8.06	8.15	8.81	10.27	9.55	8.76	8.13	9.99	9.22	10.32	8.18	8.74	8.26	7.83	9.17	8.94	8.45	8.01	8.34	9.09	8.45	9.79	9.78	9.76	8.57	8.12	9.85	8.94	8.59	9.88	8.64	7.65	8.87	8.08	8.55	8.79	8.34	8.24
0nux6yXX93xSglRl3o	7.21	7.22	7.24	7.29	7.17	7.23	7.24	7.22	7.18	7.2	7.25	7.23	7.18	7.21	7.16	7.24	7.23	7.28	7.26	7.3	7.24	7.35	7.23	7.36	7.31	7.24	7.2	7.22	7.22	7.24	7.25	7.21	7.22	7.2	7.24	7.27	7.19	7.17	7.18	7.26	7.2	7.27	7.22	7.24	7.21	7.26	7.24	7.2	7.17
0NUXtXVHXjVKQUeN58	7.38	7.43	7.45	7.47	7.48	7.45	7.48	7.31	7.46	7.54	7.47	7.5	7.52	7.38	7.29	7.44	7.56	7.67	7.25	7.38	7.27	7.28	7.5	7.21	7.34	7.41	7.43	7.26	7.23	7.31	7.29	7.4	7.4	7.33	7.43	7.32	7.41	7.31	7.44	7.39	7.32	7.34	7.42	7.41	7.33	7.28	7.33	7.25	7.3
0nv3r3Tz3nv4rHRIao	7.65	7.59	7.58	7.61	7.59	7.64	7.56	7.58	7.55	7.58	7.48	7.52	7.65	7.52	7.58	7.48	7.53	7.59	7.68	7.69	7.3	7.68	7.8	7.5	7.6	7.67	7.59	7.76	7.32	7.65	7.71	7.68	7.6	7.63	7.61	7.55	7.54	7.49	7.61	7.63	7.65	7.59	7.58	7.56	7.45	7.38	7.61	7.43	7.53
0NVNeen3Hudu7oodvo	7.27	7.27	7.28	7.35	7.24	7.25	7.3	7.29	7.3	7.24	7.33	7.33	7.27	7.28	7.29	7.24	7.24	7.42	7.47	7.41	7.39	7.46	7.42	7.44	7.48	7.2	7.24	7.29	7.36	7.27	7.26	7.29	7.32	7.28	7.33	7.45	7.31	7.32	7.26	7.32	7.21	7.26	7.33	7.29	7.3	7.43	7.51	7.35	7.37
0nVyMVb1CEokVC3eEU	7.12	7.09	7.11	7.11	7.13	7.18	7.14	7.2	7.14	7.17	7.16	7.17	7.16	7.17	7.12	7.12	7.08	7.1	7.17	7.17	7.16	7.13	7.12	7.14	7.16	7.14	7.18	7.16	7.17	7.16	7.11	7.12	7.1	7.15	7.1	7.15	7.13	7.13	7.16	7.22	7.15	7.13	7.09	7.15	7.11	7.12	7.15	7.17	7.09
0nW3uqHvE5693vlJ1I	7.33	7.25	7.22	7.12	7.22	7.36	7.26	7.2	7.2	7.26	7.25	7.22	7.28	7.19	7.26	7.17	7.29	7.25	7.21	7.19	7.22	7.22	7.22	7.18	7.22	7.25	7.23	7.25	7.23	7.27	7.31	7.24	7.26	7.2	7.28	7.15	7.26	7.21	7.23	7.26	7.3	7.17	7.25	7.19	7.22	7.23	7.16	7.24	7.26
0Nwe7usF_bRonvLgYo	9.86	9.41	9.06	9.91	9.68	9.05	9.78	9.02	9.6	9.96	9.19	10.44	9.65	10.57	9.4	10.21	8.89	10.26	8.31	8.8	9.02	9.63	9.78	9.53	9.58	10.45	9.14	9.68	9.5	9.64	9.61	8.48	9.06	9.13	8.93	9.09	9.32	9.63	9.38	9.17	8.92	10.45	10.54	10.3	9.74	9.18	9.52	9.15	9.46
0NwgDr.w99cN9Ki99c	7.19	7.17	7.2	7.15	7.19	7.12	7.15	7.15	7.2	7.1	7.19	7.16	7.15	7.11	7.17	7.11	7.19	7.19	7.15	7.17	7.2	7.19	7.19	7.16	7.15	7.18	7.12	7.2	7.16	7.21	7.17	7.14	7.11	7.14	7.23	7.12	7.17	7.15	7.14	7.15	7.22	7.13	7.23	7.16	7.25	7.11	7.17	7.23	7.18
0nXudzVXdK2.oy44Eg	7.66	7.86	7.52	7.72	7.74	8.36	7.83	7.83	7.65	8.02	7.63	7.74	7.74	7.55	7.75	7.59	7.72	7.42	8.71	8.51	8.11	7.86	8.37	8.15	7.65	8.26	7.94	8.22	8	8.2	8.07	8.11	7.9	7.64	7.89	8.28	7.78	8.23	8.35	8.01	8.18	7.89	7.6	7.68	7.69	8.22	8.21	8.08	7.97
0nyEXG6A1SW514SZ_o	8.46	8.87	8.25	8.37	9.07	8.34	8.74	8.42	8.85	7.78	8.11	8.39	8.93	8.14	8.6	8.48	8.31	9.03	8.63	8.94	8.72	8.71	8.53	8.53	9.08	8.89	8.25	8.47	8.33	8.61	8.96	8.85	8.77	8.52	8.01	8.82	8.48	8.64	9.3	9.27	8.54	8.94	7.87	8.25	7.9	8.47	8.45	9.07	8.68
0Nz6eqKrIJnlIjp5LI	7.35	7.31	7.39	7.24	7.37	7.31	7.39	7.35	7.36	7.29	7.34	7.3	7.28	7.31	7.4	7.28	7.35	7.24	7.6	7.77	7.5	7.58	7.59	7.84	7.76	7.45	7.39	7.45	7.47	7.45	7.55	7.49	7.51	7.51	7.33	7.41	7.36	7.35	7.39	7.39	7.45	7.38	7.27	7.21	7.35	7.55	7.39	7.4	7.35
0NzRp_ihggxTnldCho	7.3	7.31	7.36	7.39	7.36	7.34	7.28	7.28	7.31	7.33	7.4	7.36	7.25	7.3	7.26	7.26	7.28	7.38	7.22	7.26	7.23	7.35	7.33	7.28	7.27	7.21	7.28	7.26	7.2	7.24	7.27	7.33	7.26	7.27	7.24	7.25	7.27	7.35	7.23	7.33	7.31	7.3	7.36	7.26	7.27	7.19	7.21	7.32	7.27
0o.l5_6.5_7935_K94	7.18	7.22	7.17	7.19	7.18	7.19	7.26	7.25	7.21	7.19	7.17	7.24	7.39	7.16	7.12	7.15	7.13	7.26	7.26	7.74	7.33	7.22	7.25	7.18	7.21	7.1	7.08	7.13	7.19	7.13	7.13	7.19	7.21	7.2	7.18	7.4	7.17	7.1	7.21	7.15	7.17	7.16	7.19	7.16	7.18	7.37	7.3	7.15	7.05
0o1Fy5d6lMKeJIuJ_w	7.2	7.16	7.17	7.12	7.17	7.19	7.24	7.18	7.13	7.29	7.21	7.2	7.18	7.14	7.59	7.35	7.25	7.2	7.18	7.37	7.19	7.18	7.19	7.18	7.17	7.45	7.17	7.18	7.17	7.72	7.18	7.16	7.14	7.19	7.26	7.23	7.14	7.2	7.17	7.14	7.15	7.12	7.34	7.16	7.11	7.21	7.18	7.22	7.21
0o1K5fU3un0U30MXr8	7.39	7.37	7.36	7.37	7.36	7.34	7.33	7.39	7.32	7.31	7.5	7.26	7.33	7.25	7.36	7.31	7.28	7.39	7.32	7.35	7.37	7.34	7.48	7.3	7.61	7.33	7.37	7.47	7.31	7.47	7.36	7.41	7.4	7.47	7.39	7.46	7.34	7.26	7.34	7.45	7.46	7.36	7.33	7.31	7.36	7.4	7.37	7.39	7.25
0o1ZXUk5JIeelS16dQ	7.07	7.2	7.13	7.2	7.08	7.1	7.09	7.17	7.23	7.12	7.11	7.12	7.19	7.17	7.15	7.14	7.1	7.12	7.17	7.17	7.17	7.08	7.12	7.12	7.15	7.08	7.17	7.12	7.17	7.07	7.09	7.12	7.09	7.05	7.05	7.12	7.09	7.14	7.15	7.14	7.12	7.14	7.07	7.2	7.1	7.15	7.1	7.13	7.07
0o30vPYqg4pK0JY5yU	7.56	7.58	7.75	7.5	7.84	7.39	7.36	7.36	7.97	8.12	7.46	7.65	7.46	7.8	7.52	7.5	7.54	7.35	7.46	7.57	7.56	7.32	7.69	7.65	7.27	8.19	7.38	7.58	7.6	7.61	7.54	7.39	7.72	7.52	7.52	7.37	7.43	7.51	7.48	7.43	7.66	7.55	7.48	7.59	7.74	7.33	7.44	7.5	7.65
0o31dL0n944R5JVJQY	7.19	7.16	7.13	7.2	7.22	7.16	7.18	7.19	7.1	7.19	7.2	7.19	7.17	7.17	7.12	7.16	7.22	7.2	7.23	7.22	7.17	7.19	7.2	7.2	7.18	7.19	7.19	7.14	7.22	7.15	7.23	7.14	7.15	7.24	7.17	7.21	7.2	7.18	7.16	7.15	7.18	7.19	7.18	7.19	7.18	7.22	7.23	7.21	7.24
0O4NUqpIiineikRKOQ	7.3	7.23	7.26	7.22	7.21	7.32	7.2	7.33	7.22	7.25	7.26	7.34	7.19	7.34	7.24	7.31	7.32	7.29	7.27	7.2	7.27	7.2	7.3	7.18	7.22	7.34	7.26	7.29	7.32	7.35	7.25	7.3	7.32	7.32	7.25	7.21	7.31	7.23	7.32	7.26	7.26	7.29	7.29	7.33	7.15	7.24	7.31	7.29	7.26
0o5vl.5J7o9u6vXv1I	9.14	7.78	8.99	8.81	8.55	7.89	8.5	8.68	8.11	8.11	8.49	8.45	9.14	8.73	8.56	9.33	8.52	8.2	7.83	8.51	8.61	8.97	8.33	8.9	8.91	7.96	8.81	8.59	8.5	8.47	8.36	8.41	8.13	8.53	8.77	8.73	8.42	9.03	9.39	8.9	8.27	8.64	8.73	8.08	8.77	8.59	8.36	7.92	7.94
0O6DVDlpSUoUDUzVVE	7.4	7.68	7.29	7.38	7.87	7.49	7.54	7.74	7.49	7.4	7.31	7.41	7.56	7.37	7.31	7.38	7.41	7.24	7.16	7.18	7.21	7.06	7.19	7.1	7.11	7.55	7.67	7.62	7.16	7.36	7.54	7.25	7.18	7.18	7.6	7.19	7.78	7.27	7.37	7.29	7.32	7.49	7.33	7.3	7.2	7.14	7.17	7.3	7.53
0O6fj3lURe7ZV7TDbg	7.47	7.94	7.6	7.41	7.56	7.74	7.61	7.96	7.71	8.2	7.7	7.4	7.9	7.4	7.6	7.91	7.65	7.28	7.28	7.29	7.31	7.2	7.29	7.28	7.27	7.31	7.53	7.26	7.27	7.33	7.41	7.5	7.5	7.23	7.88	7.36	7.85	7.53	7.28	7.31	7.29	8.02	7.86	7.95	7.64	7.35	7.21	7.46	7.41
0o6KpUl6Hh7H17d79Q	7.56	7.48	7.45	7.37	7.42	7.4	7.38	7.77	7.77	7.34	7.36	8.49	7.66	7.67	7.48	7.56	7.43	11.57	8.25	7.2	7.4	8.51	7.21	7.19	8.2	7.36	7.45	7.44	7.44	7.62	7.82	7.38	7.52	7.45	7.32	7.36	8.64	7.32	7.46	8.48	8.35	7.47	7.26	7.55	8.02	7.36	7.73	7.5	7.51
0o6oo6_RBLuLsfDlHk	7.33	7.41	7.36	7.42	7.52	7.27	7.4	7.49	7.49	7.82	7.39	7.45	7.51	7.53	7.35	7.45	7.56	7.51	7.26	7.32	7.29	7.23	7.35	7.26	7.27	7.45	7.41	7.57	7.27	7.35	7.53	7.43	7.35	7.47	7.45	7.44	7.53	7.43	7.44	7.29	7.49	7.36	7.57	7.59	7.36	7.36	7.63	7.33	7.53
0O7kIehCSpTuFqqN90	7.38	7.33	7.33	7.42	7.3	7.24	7.3	7.27	7.34	7.36	7.25	7.45	7.28	7.41	7.31	7.36	7.37	7.46	7.45	7.52	7.3	7.51	7.36	7.55	7.45	7.34	7.34	7.32	7.43	7.4	7.26	7.24	7.31	7.39	7.33	7.44	7.4	7.21	7.39	7.29	7.4	7.3	7.39	7.51	7.37	7.32	7.35	7.27	7.26
0oa9ic4DvihFxG496I	6.97	7.09	7.1	7.09	7.19	7.07	7.08	7.11	7.05	7.07	7.05	7.1	7.07	7.13	7.13	7.07	7.11	7.96	7.11	7.16	7.14	7.12	7.09	7.05	7.08	7.05	6.97	7.02	7.14	7.03	7.08	7.08	7.05	7.05	7.11	7.11	7.02	7.03	7.12	7.01	7.12	7.04	7.1	7.08	7.24	7.13	7.11	7.04	7.03
0oApOuEOqnslcogaqg	7.48	7.36	7.37	7.34	7.43	7.29	7.37	7.38	7.36	7.31	7.42	7.39	7.31	7.31	7.39	7.38	7.39	7.35	7.56	7.78	7.43	7.31	7.51	7.67	7.82	7.33	7.33	7.42	7.49	7.39	7.52	7.53	7.51	7.5	7.39	7.57	7.37	7.33	7.48	7.39	7.32	7.45	7.41	7.4	7.46	7.55	7.47	7.28	7.34
0oBFEr1Mu7rgjq61T8	7.18	7.15	7.16	7.13	7.21	7.16	7.18	7.1	7.16	7.24	7.17	7.24	7.22	7.16	7.18	7.17	7.15	7.14	7.12	7.17	7.19	7.08	7.13	7.09	7.13	7.21	7.12	7.13	7.14	7.2	7.19	7.16	7.18	7.12	7.21	7.14	7.18	7.24	7.2	7.17	7.13	7.16	7.17	7.23	7.13	7.09	7.16	7.18	7.19
0obqCwo9ChBdef3p_o	7.24	7.29	7.25	7.23	7.17	7.35	7.21	7.16	7.29	7.24	7.16	7.18	7.17	7.23	7.22	7.21	7.22	7.24	7.2	7.19	7.23	7.2	7.21	7.18	7.2	7.22	7.16	7.21	7.24	7.27	7.22	7.22	7.2	7.12	7.17	7.35	7.14	7.37	7.22	7.26	7.18	7.29	7.34	7.24	7.34	7.21	7.21	7.18	7.16
0OCgUmioXWoopnlSYk	7.22	7.22	7.2	7.24	7.22	7.18	7.18	7.19	7.19	7.13	7.27	7.3	7.24	7.23	7.22	7.21	7.23	7.19	7.29	7.25	7.24	7.21	7.33	7.31	7.3	7.27	7.2	7.24	7.19	7.24	7.24	7.22	7.25	7.24	7.21	7.22	7.17	7.28	7.24	7.31	7.35	7.25	7.22	7.2	7.19	7.22	7.19	7.22	7.35
0OciNEgUpEqp05ew1I	7.53	7.36	7.43	7.26	7.37	7.4	7.45	7.38	7.47	7.45	7.45	7.32	7.39	7.38	7.37	7.47	7.43	7.52	7.21	7.29	7.31	7.23	7.25	7.19	7.26	7.38	7.36	7.45	7.35	7.42	7.35	7.35	7.32	7.46	7.47	7.23	7.35	7.39	7.39	7.44	7.33	7.35	7.37	7.38	7.45	7.22	7.2	7.35	7.26
0OCKkJDv.pNeHEvE5I	7.3	7.27	7.22	7.13	7.2	7.2	7.23	7.23	7.25	7.63	7.21	7.18	7.31	7.27	7.19	7.22	7.23	7.18	7.23	7.23	7.21	7.2	7.25	7.18	7.25	7.25	7.24	7.26	7.24	7.28	7.29	7.33	7.25	7.26	7.21	7.22	7.21	7.22	7.19	7.26	7.3	7.21	7.16	7.28	7.22	7.29	7.19	7.26	7.29
0OClBFO1BxGeeXVJec	7.29	7.41	7.35	7.38	7.61	7.21	7.21	7.29	7.35	7.37	7.48	7.37	7.25	7.33	7.28	7.36	7.31	7.35	7.37	7.18	7.23	7.21	7.16	7.17	7.18	7.2	7.3	7.23	7.24	7.23	7.2	7.85	7.27	7.27	7.25	7.23	7.35	7.31	7.2	7.38	7.31	7.28	7.22	7.23	7.22	7.25	7.2	7.41	7.35
0od6tTg.fOTYXfesgI	7.07	7.13	7.14	7.11	7.11	7.13	7.11	7.14	7.08	7.03	7.08	7.14	7.14	7.12	7.09	7.05	7.05	7.11	7.18	7.17	7.18	7.18	7.17	7.11	7.17	7.07	7.14	7.05	7.14	7.11	7.12	7.11	7.17	7.12	7.14	7.14	7.15	7.13	7.12	7.12	7.19	7.16	7.1	7.1	7.12	7.15	7.14	7.12	7.08
0oDEtU7wy5_1PoANOo	7.34	7.36	7.29	7.31	7.33	7.41	7.42	7.35	7.37	7.3	7.34	7.41	7.35	7.4	7.37	7.31	7.35	7.39	7.29	7.52	7.31	7.34	7.25	7.33	7.35	7.28	7.37	7.47	7.38	7.45	7.4	7.37	7.34	7.4	7.38	7.47	7.33	7.38	7.35	7.44	7.38	7.31	7.41	7.46	7.32	7.44	7.42	7.33	7.47
0oDgfo.TzHkLpX_ub0	8.24	8.61	8.59	8.75	8.41	9.05	8.77	8.58	8.9	8.4	8.64	9	8.88	8.69	8.24	8.83	8.28	8.53	7.86	7.74	8.39	7.6	7.66	7.96	7.53	8.04	8.7	8.32	7.92	8.06	8.36	8	8.41	8.2	8.93	7.67	8.63	8.3	8.01	7.74	7.97	8.73	8.98	8.93	9.07	7.75	7.78	7.99	8.24
0odOn.BxDak9Su6ktU	9.1	8.45	9.04	8.23	9	7.59	7.94	8.16	7.87	8.13	8.32	7.84	9.15	7.59	8.69	8.25	8.3	7.23	7.65	8.18	8.17	7.88	9.88	8.6	7.88	8.86	8.89	8.5	8.4	8.46	8.93	8.98	8.09	8.19	8.56	8.91	8.29	10.08	8.49	8.54	8.11	8.59	8.26	8.94	8.02	9.11	8.97	8.53	8.55
0ODZ56md9e3d55xebc	7.21	7.24	7.32	7.2	7.3	7.17	7.23	7.38	7.27	7.31	7.28	7.3	7.27	7.18	7.19	7.28	7.27	7.28	7.21	7.23	7.32	7.2	7.21	7.18	7.19	7.15	7.24	7.17	7.34	7.24	7.22	7.16	7.2	7.24	7.22	7.4	7.26	7.21	7.2	7.18	7.15	7.24	7.23	7.25	7.17	7.28	7.21	7.21	7.16
0oE4h9e4UtRXp1Se3s	7.25	7.28	7.35	7.68	7.53	7.25	7.29	7.27	7.3	7.31	7.25	7.46	7.29	7.41	7.29	7.46	7.35	8.12	7.18	7.16	7.21	7.14	7.09	7.14	7.09	7.12	7.19	7.23	7.17	7.22	7.15	7.32	7.16	7.2	7.28	7.13	7.35	7.23	7.27	7.2	7.19	7.28	7.63	7.35	7.5	7.14	7.31	7.25	7.17
0oehIIiH.FeqR0RpQk	9.19	9.04	11.44	10.41	13.05	9.41	11.44	9.88	11.08	12.32	11.58	11.24	12.13	11.46	11.53	10.36	10	8.55	10.61	10.14	10.3	9.07	8.56	9.44	9.15	11.79	8.73	11.55	11.63	11.67	9.09	11.3	8.6	10.52	10.01	9.97	7.86	11.42	10.57	12.39	10.86	11.87	11.3	8.76	9.87	8.99	11.76	11.62	9.19
0oelAEDeJQc61MUnhE	7.27	7.36	7.2	7.54	7.32	7.22	7.24	7.34	7.28	7.62	7.28	7.32	7.25	7.26	7.27	7.32	7.27	7.23	7.22	7.22	7.39	7.24	7.31	7.51	7.2	7.2	7.31	7.22	7.25	7.23	7.24	7.26	7.21	7.26	7.39	7.33	7.36	7.31	7.24	7.28	7.29	7.28	7.39	7.44	7.32	7.31	7.21	7.24	7.26
0oEZ5kiHfVoQH1IlXo	7.24	7.28	7.34	7.26	7.27	7.25	7.29	7.29	7.22	7.33	7.24	7.34	7.3	7.32	7.25	7.29	7.21	7.37	7.33	7.25	7.33	7.22	7.22	7.23	7.34	7.21	7.27	7.3	7.24	7.19	7.21	7.21	7.29	7.16	7.31	7.42	7.23	7.24	7.32	7.42	7.25	7.27	7.3	7.26	7.29	7.31	7.35	7.25	7.29
0oFCkA4Pp9yq3gXx5U	9.45	10.47	10.4	8.23	9.59	10.81	9.58	10.19	10.57	10.81	9.32	9.71	10.23	9.84	10.2	10.18	10.36	9.92	9.23	9.45	9.48	8.6	9.27	9.06	9.04	9.62	10.32	8.48	9.75	9.7	9.13	10.19	9.73	9.55	9.94	10.01	10.41	11.78	9.82	9.57	9.46	9.77	10.11	9.42	10.28	9.13	9.89	9.3	9.63
0ofHjvkrSk6U_kQoJI	7.21	7.21	7.2	7.16	7.15	7.25	7.25	7.26	7.19	7.18	7.21	7.23	7.23	7.25	7.15	7.21	7.24	7.23	7.19	7.36	7.37	7.25	7.26	7.17	7.27	7.22	7.16	7.25	7.32	7.19	7.2	7.22	7.27	7.27	7.2	7.2	7.24	7.21	7.24	7.13	7.17	7.2	7.3	7.21	7.3	7.31	7.22	7.24	7.22
0OFNST5X8jC21Ane1E	7.2	7.2	7.3	7.26	7.23	7.22	7.23	7.23	7.23	7.26	7.24	7.27	7.21	7.19	7.18	7.21	7.2	7.28	7.31	7.19	7.24	7.21	7.24	7.22	7.23	7.21	7.2	7.2	7.3	7.21	7.19	7.18	7.28	7.22	7.19	7.23	7.18	7.09	7.2	7.24	7.19	7.17	7.15	7.24	7.26	7.32	7.22	7.21	7.15
0ofRQkgMVokZTUQrnk	10.53	9.92	10.55	9.65	9.62	10.21	9.71	9.3	9.49	10.35	9.12	9.41	9.47	9.95	10.51	9.6	9.58	8.87	9.85	9.32	10.59	9.53	9.81	8.79	9.48	10.08	9.74	10.16	9.59	9.78	9.64	10.38	10.79	10.01	9.87	9.26	9.13	10.18	9.72	9.92	10.27	8.76	9.65	9.8	8.99	9.04	9.79	9.79	9.81
0og6v01SXG0T_VLl84	7.91	7.79	8.23	7.71	8	8.08	8	7.84	8.22	7.47	7.73	7.89	7.81	7.96	7.8	7.7	7.92	7.89	8.3	8.01	8.36	7.78	7.56	8.03	7.92	7.96	7.74	8.03	8.12	7.9	7.82	8.19	8.01	8.11	8.11	7.8	7.73	7.87	8	8.18	8.09	7.89	7.61	7.64	7.69	7.81	8.04	7.66	7.98
0og7FUeReJ161dJQhc	7.38	7.33	7.36	7.28	7.31	7.36	7.26	7.44	7.34	7.28	7.31	7.38	7.43	7.27	7.26	7.28	7.3	7.4	7.55	7.46	7.45	7.34	7.87	7.55	7.58	7.59	7.39	7.57	7.51	7.44	7.63	7.3	7.36	7.38	7.34	7.51	7.37	7.5	7.43	7.32	7.38	7.32	7.21	7.35	7.2	7.48	7.53	7.25	7.43
0ogp2tEp1KTd3VK7.I	9.59	7.82	9.39	9.66	8.84	10.19	9.52	9.78	9.4	7.65	8.8	9.6	9.32	8.58	9.24	8.61	8.79	9.12	9.49	9.91	9.68	9.49	9.28	10.62	9.46	9.44	8.87	9.77	9.5	9.21	9.56	10.37	10.25	9.68	9.04	9.45	8.95	9.13	9.94	9.67	9.71	8.84	8.08	8.45	8.68	9.53	9.86	9.87	9.54
0OgQB40Obucgqup6hE	7.47	7.85	7.61	7.88	8.11	7.65	8.27	7.87	7.48	7.45	7.58	7.52	7.64	7.92	7.56	7.34	7.49	7.85	7.4	7.58	7.58	7.26	7.49	7.49	7.36	7.43	7.26	7.46	7.47	7.66	7.55	7.31	7.54	7.7	7.35	7.66	7.33	7.79	7.41	7.48	7.74	7.88	8.63	7.39	7.92	7.55	7.82	7.53	7.61
0OH126SXTj3iNEkbk4	7.17	7.17	7.21	7.23	7.2	7.24	7.2	7.15	7.19	7.19	7.17	7.15	7.23	7.26	7.17	7.17	7.21	7.21	7.25	7.21	7.25	7.2	7.19	7.18	7.21	7.18	7.15	7.19	7.22	7.15	7.19	7.22	7.17	7.22	7.1	7.23	7.16	7.19	7.18	7.25	7.2	7.18	7.15	7.16	7.18	7.19	7.29	7.13	7.18
0OhigjCn.CSAQAiiSA	7.12	7.16	7.24	7.2	7.32	7.2	7.08	7.1	7.24	7.29	7.29	7.35	7.19	7.18	7.13	7.21	7.2	7.19	7.11	7.15	7.17	7.07	7.09	7.07	7.07	7.16	7.22	7.1	7.11	7.11	7.13	7.16	7.09	7.11	7.15	7.09	7.12	7.17	7.14	7.13	7.16	7.07	7.26	7.33	7.22	7.12	7.12	7.14	7.23
0ohJKcucigP44k6.1I	7.11	7.15	7.18	7.12	7.14	7.17	7.13	7.06	7.08	7.13	7.07	7.1	7.08	7.13	7.11	7.07	7.16	7.12	7.16	7.18	7.19	7.19	7.14	7.18	7.17	7.1	7.14	7.1	7.16	7.14	7.15	7.16	7.06	7.14	7.1	7.18	7.07	7.05	7.14	7.11	7.12	7.15	7.18	7.08	7.12	7.16	7.17	7.1	7.08
0OhpUjpTnkvTSSSnVA	7.26	7.32	7.21	7.21	7.24	7.19	7.21	7.31	7.31	7.32	7.21	7.34	7.25	7.19	7.24	7.24	7.28	7.17	7.17	7.19	7.19	7.2	7.27	7.18	7.2	7.32	7.26	7.26	7.18	7.24	7.26	7.28	7.26	7.21	7.37	7.15	7.27	7.32	7.35	7.17	7.28	7.31	7.29	7.2	7.27	7.23	7.16	7.27	7.27
0OHus_wdBd1KC9958A	7.2	7.12	7.18	7.18	7.15	7.17	7.09	7.13	7.14	7.04	7.17	7.13	7.16	7.12	7.21	7.07	7.17	7.14	7.21	7.24	7.22	7.19	7.23	7.17	7.19	7.1	7.09	7.25	7.2	7.18	7.1	7.16	7.2	7.17	7.14	7.16	7.09	7.15	7.06	7.14	7.16	7.14	7.21	7.12	7.16	7.27	7.17	7.07	7.11
0OI.V5qOapCh5H3U5E	7.27	7.22	7.24	7.21	7.29	7.34	7.35	7.3	7.22	7.24	7.24	7.21	7.28	7.23	7.26	7.25	7.27	7.2	7.17	7.17	7.19	7.08	7.15	7.11	7.14	7.25	7.22	7.3	7.13	7.25	7.27	7.24	7.25	7.2	7.25	7.12	7.23	7.27	7.23	7.23	7.26	7.24	7.18	7.26	7.31	7.15	7.12	7.23	7.23
0OI5CQCnpkgymeRH70	7.21	7.2	7.26	7.25	7.23	7.28	7.29	7.23	7.23	7.22	7.11	7.27	7.28	7.31	7.22	7.27	7.21	7.28	7.21	7.2	7.23	7.22	7.21	7.18	7.21	7.32	7.27	7.28	7.24	7.23	7.26	7.26	7.24	7.28	7.25	7.18	7.26	7.33	7.2	7.28	7.31	7.28	7.22	7.26	7.23	7.19	7.2	7.27	7.36
0OiCkOCQeguSIHiCiY	7.17	7.13	7.19	7.12	7.15	7.11	7.1	7.14	7.16	7.12	7.19	7.17	7.09	7.15	7.14	7.11	7.1	7.19	7.21	7.17	7.2	7.19	7.16	7.17	7.19	7.1	7.17	7.14	7.18	7.14	7.15	7.1	7.14	7.18	7.05	7.16	7.12	7.17	7.21	7.14	7.16	7.05	7.2	7.14	7.19	7.12	7.14	7.15	7.15
0oikDV78.6648eV_eo	7.19	7.19	7.37	7.24	7.23	7.18	7.17	7.18	7.22	7.2	7.14	7.29	7.16	7.25	7.27	7.21	7.23	7.22	7.17	7.17	7.19	7.19	7.16	7.18	7.18	7.22	7.22	7.14	7.18	7.14	7.2	7.19	7.23	7.16	7.21	7.25	7.12	7.16	7.23	7.18	7.22	7.14	7.24	7.27	7.18	7.16	7.16	7.13	7.21
0oimJ7iIL8UsdYtzF0	7.3	7.32	7.34	7.32	7.27	7.29	7.47	7.36	7.28	7.27	7.27	7.37	7.37	7.32	7.37	7.29	7.27	7.27	7.41	7.34	7.37	7.39	7.35	7.49	7.3	7.27	7.3	7.29	7.31	7.36	7.3	7.34	7.29	7.4	7.27	7.4	7.32	7.38	7.35	7.51	7.32	7.25	7.35	7.26	7.36	7.34	7.37	7.33	7.37
0oioEqHoSB1OEE_DIA	7.28	7.3	7.26	7.24	7.28	7.3	7.27	7.3	7.28	7.32	7.27	7.25	7.3	7.34	7.26	7.34	7.35	7.29	7.35	7.32	7.33	7.34	7.24	7.71	7.41	7.32	7.39	7.33	7.41	7.28	7.43	7.36	7.36	7.28	7.29	7.23	7.31	7.45	7.37	7.33	7.47	7.33	7.33	7.26	7.27	7.35	7.41	7.34	7.31
0OjaXzXRRVUxi3Xevk	7.18	7.23	7.25	7.21	7.23	7.14	7.14	7.13	7.21	7.21	7.25	7.2	7.19	7.28	7.2	7.18	7.17	7.21	7.26	7.36	7.21	7.21	7.47	7.33	7.22	7.2	7.17	7.1	7.24	7.16	7.21	7.18	7.2	7.26	7.13	7.3	7.22	7.1	7.21	7.23	7.19	7.22	7.12	7.22	7.2	7.31	7.39	7.17	7.21
0ojopQa7oLrcXoaTgs	7.21	7.2	7.19	7.19	7.22	7.22	7.36	7.23	7.23	7.2	7.23	7.45	7.23	7.61	7.23	7.24	7.48	7.2	7.21	7.19	7.2	7.2	7.2	7.18	7.18	7.23	7.21	7.22	7.17	7.19	7.24	7.21	7.26	7.26	7.28	7.19	7.22	7.19	7.21	7.32	7.2	7.51	7.39	7.09	7.24	7.48	7.24	7.55	7.17
0OJW4W7W6PLi3ul7lc	7.21	7.17	7.22	7.25	7.23	7.28	7.12	7.24	7.27	7.17	7.16	7.24	7.15	7.1	7.17	7.28	7.22	7.23	7.18	7.19	7.19	7.18	7.17	7.17	7.2	7.17	7.25	7.21	7.23	7.19	7.21	7.2	7.21	7.2	7.12	7.2	7.18	7.16	7.15	7.24	7.18	7.18	7.17	7.2	7.25	7.19	7.22	7.2	7.16
0OK4mTYdgNSu4jPqio	8.11	8.02	8.18	8.14	8.19	8.33	8.28	8.25	8.16	7.85	8.03	7.95	8.12	8.07	8	7.98	8.11	8.09	8.74	8.74	8.32	8.6	8.7	8.65	8.52	8.5	8.12	8.52	8.61	8.49	8.73	8.53	8.8	8.58	8.3	8.55	8.19	8.54	8.54	8.45	8.41	8.06	7.99	8.09	7.88	8.5	8.58	8.48	8.11
0OkbNRBxJNESKJ9HtU	7.08	7.1	7.09	7.15	7.08	7.13	7.06	7.06	7.09	7.01	7.09	7.1	7.1	7.13	7.14	7.08	7.14	7.12	7.17	7.19	7.2	7.11	7.17	7.15	7.15	7.13	7.06	7.15	7.18	7.05	7.1	7.14	7.07	7.09	7.08	7.12	7.07	7.03	7.14	7.11	7.11	7.12	7.12	7.06	7.06	7.15	7.15	7.1	7.07
0OKEDvnfTXFJ7_9.rI	7.11	7.18	7.19	7.22	7.13	7.15	7.14	7.11	7.17	7.11	7.27	7.26	7.23	7.12	7.16	7.1	7.16	7.16	7.45	7.21	7.23	7.19	7.21	7.19	7.2	7.12	7.16	7.22	7.3	7.18	7.11	7.17	7.15	7.14	7.23	7.21	7.15	7.26	7.16	7.19	7.13	7.18	7.09	7.15	7.1	7.23	7.23	7.16	7.12
0okUXvXio4pRQef.4g	7.28	7.17	7.18	7.22	7.28	7.16	7.22	7.27	7.21	7.15	7.23	7.23	7.27	7.26	7.22	7.19	7.16	7.23	7.18	7.19	7.26	7.23	7.2	7.21	7.23	7.29	7.35	7.28	7.19	7.26	7.37	7.32	7.2	7.24	7.25	7.17	7.27	7.31	7.27	7.24	7.26	7.26	7.23	7.29	7.19	7.19	7.2	7.23	7.24
0oKynOh1.6T95dJBIo	7.27	7.26	7.25	7.26	7.2	7.25	7.22	7.13	7.42	7.17	7.23	7.22	7.25	7.24	7.33	7.19	7.21	7.23	7.3	7.21	7.37	7.54	7.5	7.53	7.47	7.26	7.21	7.27	7.3	7.25	7.24	7.31	7.25	7.25	7.29	7.32	7.25	7.29	7.3	7.24	7.26	7.25	7.26	7.26	7.3	7.37	7.23	7.22	7.27
0olIj_R4CpqPi2UvtI	7.3	7.39	7.29	7.3	7.34	7.38	7.45	7.37	7.35	7.68	7.34	7.52	7.66	7.28	7.25	7.39	7.32	7.29	7.21	7.28	7.25	7.39	7.45	7.43	7.39	7.54	7.27	7.24	7.25	7.39	7.29	7.19	7.34	7.32	7.45	7.35	7.33	7.35	7.29	7.29	7.34	7.39	7.3	7.32	7.33	7.22	7.37	7.32	7.41
0olIOBN_oUk2s4e5JA	7.26	7.24	7.28	7.2	7.23	7.35	7.3	7.31	7.24	7.24	7.23	7.25	7.26	7.28	7.22	7.25	7.24	7.22	7.26	7.2	7.25	7.34	7.32	7.44	7.2	7.29	7.31	7.2	7.34	7.26	7.31	7.25	7.29	7.26	7.25	7.3	7.29	7.29	7.22	7.27	7.3	7.28	7.22	7.27	7.28	7.26	7.32	7.27	7.28
0oLW.KoHB5E9CIptbo	7.52	7.32	7.37	7.42	7.45	7.52	7.53	7.43	7.36	7.4	7.32	7.33	7.38	7.39	7.39	7.42	7.44	7.48	7.55	7.47	7.49	7.51	7.56	7.67	7.4	7.48	7.44	7.38	7.37	7.32	7.42	7.53	7.49	7.37	7.45	7.52	7.51	7.39	7.5	7.34	7.37	7.39	7.34	7.4	7.35	7.42	7.5	7.43	7.34
0om69xRVepMTA2ETlA	7.47	7.35	7.29	7.23	7.28	7.79	7.29	7.38	7.26	7.32	7.2	7.3	7.42	7.23	7.58	7.33	7.27	7.71	7.19	7.19	7.21	7.18	7.14	7.12	7.17	7.38	7.59	7.25	7.18	7.39	7.26	7.33	7.36	7.55	7.41	7.26	7.44	7.27	7.49	7.48	7.6	7.43	7.35	7.24	7.59	7.4	7.23	7.26	7.23
0omhInXgIJT6IKwLhU	7.25	7.21	7.2	7.27	7.26	7.19	7.39	7.28	7.19	7.22	7.22	7.23	7.3	7.33	7.25	7.3	7.25	7.25	7.24	7.19	7.22	7.32	7.2	7.2	7.22	7.27	7.35	7.27	7.26	7.27	7.23	7.29	7.27	7.24	7.26	7.23	7.25	7.31	7.23	7.23	7.26	7.22	7.26	7.27	7.28	7.22	7.2	7.26	7.35
0oMqVpzvT_lLfx6Rfk	7.21	7.14	7.13	7.18	7.16	7.17	7.2	7.22	7.23	7.14	7.14	7.24	7.13	7.19	7.22	7.2	7.13	7.26	7.17	7.18	7.21	7.17	7.18	7.17	7.18	7.24	7.16	7.16	7.16	7.2	7.27	7.19	7.2	7.2	7.24	7.16	7.17	7.22	7.24	7.22	7.23	7.27	7.12	7.11	7.37	7.19	7.21	7.21	7.24
0oNfKqWUoQeFAAd6gc	7.47	7.39	7.43	7.37	7.4	7.47	7.47	7.46	7.43	7.39	7.46	7.31	7.39	7.42	7.4	7.39	7.35	7.48	7.45	7.41	7.44	7.59	7.65	7.82	7.33	7.5	7.57	7.6	7.43	7.52	7.57	7.56	7.49	7.47	7.46	7.38	7.49	7.48	7.51	7.48	7.49	7.43	7.32	7.4	7.44	7.46	7.27	7.51	7.44
0oNfVLk9TSLzpPjL30	7.23	7.19	7.14	7.15	7.17	7.29	7.32	7.6	7.16	7.26	7.11	7.08	7.36	7.09	7.24	7.19	7.16	7.24	7.17	7.16	7.18	7.11	7.16	7.1	7.16	7.17	7.39	7.25	7.14	7.23	7.24	7.1	7.18	7.09	7.29	7.14	7.32	7.18	7.34	7.15	7.3	7.42	7.2	7.09	7.16	7.11	7.19	7.11	7.16
0ONKi6BeJ2JWSOF6Og	7.11	7.27	7.17	7.19	7.21	7.19	7.2	7.18	7.15	7.19	7.16	7.22	7.19	7.14	7.19	7.13	7.15	7.18	7.16	7.17	7.19	7.16	7.14	7.13	7.15	7.14	7.16	7.15	7.19	7.17	7.14	7.23	7.16	7.23	7.19	7.15	7.13	7.15	7.19	7.14	7.48	7.19	7.13	7.13	7.25	7.14	7.35	7.85	7.16
0onl4o7AV5QAog8Xd4	7.53	7.7	7.47	7.76	7.35	7.34	9.08	7.61	7.62	7.48	7.36	7.41	7.68	7.4	7.39	7.49	10.02	7.8	7.36	7.32	7.46	8.82	7.46	7.6	7.27	7.31	7.58	7.41	7.22	7.38	7.45	7.3	7.36	7.65	7.53	7.45	7.48	7.48	8	8.22	7.4	7.59	7.45	7.66	7.42	7.33	7.34	7.33	7.55
0onmoDvgmUoiH.mQYs	7.3	7.52	7.5	7.32	7.48	7.63	7.46	7.48	7.48	7.94	7.58	7.4	7.48	7.33	7.44	7.33	7.32	7.26	8.07	8.54	7.59	7.2	7.81	7.56	7.3	7.64	7.66	8.12	7.52	7.61	7.9	8	7.44	7.39	7.49	7.58	7.77	7.58	7.77	7.47	7.67	7.61	7.69	7.48	7.42	7.71	7.24	7.67	7.48
0onxwe6.kVwR3okHy0	8.87	8.36	8.96	9.16	9.46	9.62	8.54	8.92	9.24	8.86	9.14	10.28	8.93	9.46	9.71	8.81	9.12	8.84	10.51	8.88	9.44	7.86	8.84	7.6	7.59	9.26	9.11	9.17	8.36	8.48	8.8	8.6	8.99	9.01	9.51	8.66	8.34	9.23	8.99	8.38	9.47	9.41	9.47	9.54	8.91	8.6	8.41	8.34	8.71
0OO0kefWtrpn3d6ViU	7.36	7.58	7.41	7.4	7.53	7.33	7.23	7.39	7.58	7.54	7.35	7.72	7.24	7.34	7.35	7.3	7.39	7.25	7.74	7.48	7.26	7.41	7.74	7.33	7.24	7.44	7.4	7.49	7.34	7.31	7.37	7.29	7.41	7.39	7.37	7.41	7.37	7.28	7.25	7.62	7.34	7.37	7.34	7.33	7.28	7.36	7.4	7.39	7.67
0oo4kjKAqU3UU_VFFM	7.19	7.23	7.25	7.21	7.22	7.24	7.3	7.19	7.22	7.26	7.24	7.22	7.21	7.37	7.25	7.23	7.18	7.27	7.19	7.17	7.2	7.18	7.2	7.17	7.18	7.16	7.21	7.18	7.2	7.2	7.28	7.2	7.23	7.26	7.2	7.23	7.27	7.25	7.19	7.27	7.19	7.22	7.22	7.18	7.2	7.17	7.14	7.21	7.34
0ooKeep4IIokrenMII	7.27	7.22	7.27	7.13	7.22	7.26	7.2	7.31	7.16	7.26	7.21	7.3	7.26	7.16	7.15	7.28	7.28	7.25	7.19	7.18	7.21	7.14	7.16	7.16	7.19	7.22	7.14	7.2	7.29	7.08	7.2	7.23	7.11	7.17	7.34	7.16	7.27	7.19	7.14	7.09	7.24	7.26	7.18	7.36	7.36	7.18	7.15	7.22	7.17
0Op.5.5_6j0nu1XUtY	7.28	7.25	7.28	7.45	7.28	7.54	7.28	7.29	7.34	7.24	7.26	7.44	7.25	7.35	7.29	7.24	7.38	7.33	7.31	7.24	7.21	7.36	7.25	7.19	7.3	7.21	7.2	7.2	7.28	7.23	7.15	7.17	7.26	7.19	7.22	7.18	7.36	7.24	7.2	7.24	7.25	7.33	7.29	7.22	7.23	7.23	7.22	7.17	7.21
0op6gDtBV7.skuAh6E	7.1	7.15	7.16	7.09	7.16	7.11	7.09	7.14	7.13	7.08	7.16	7.1	7.17	7.12	7.16	7.11	7.09	7.13	7.15	7.18	7.2	7.14	7.16	7.17	7.17	7.13	7.06	7.17	7.17	7.08	7.11	7.15	7.15	7.1	7.07	7.12	7.15	7.13	7.19	7.11	7.15	7.15	7.16	7.13	7.16	7.15	7.18	7.17	7.13
0op6gHE.eIdfTTSjlI	7.18	7.16	7.22	7.13	7.14	7.11	7.15	7.14	7.24	7.11	7.18	7.21	7.17	7.11	7.1	7.13	7.1	7.13	7.19	7.18	7.18	7.16	7.15	7.15	7.17	7.17	7.21	7.13	7.22	7.17	7.12	7.16	7.16	7.11	7.22	7.66	7.14	7.07	7.07	7.18	7.19	7.23	7.12	7.23	7.22	7.17	7.17	7.15	7.13
0Op_ydMXgHk9Rzj_1U	7.21	7.27	7.26	7.24	7.2	7.3	7.22	7.26	7.23	7.25	7.2	7.18	7.24	7.22	7.23	7.25	7.23	7.18	7.21	7.35	7.28	7.2	7.42	7.33	7.41	7.33	7.37	7.21	7.21	7.24	7.21	7.3	7.23	7.25	7.22	7.34	7.25	7.34	7.34	7.21	7.26	7.28	7.28	7.22	7.25	7.4	7.24	7.26	7.26
0operhp6TuffDDpfp0	7.28	7.28	7.33	7.23	7.27	7.22	7.22	7.3	7.35	7.25	7.23	7.25	7.23	7.38	7.28	7.37	7.24	7.27	7.19	7.2	7.23	7.2	7.2	7.2	7.21	7.26	7.26	7.25	7.36	7.27	7.25	7.24	7.25	7.33	7.22	7.24	7.19	7.33	7.25	7.35	7.24	7.26	7.25	7.36	7.34	7.18	7.25	7.17	7.37
0OpLNZZTXfW4pmeIVo	8.19	8.4	7.59	8.42	8.86	8.68	7.51	8.27	8.87	8.29	8.77	8.41	8.49	9.57	8.76	7.86	8.73	7.4	9.9	9.75	8.28	8.26	8.48	8.9	8.14	9.05	8.28	9.12	8.47	8.66	9.32	9.14	9.97	8	7.92	9.38	8.26	8.31	9.6	9.06	8.32	7.86	8.68	8.4	8.27	9.07	8.76	8.95	9.33
0oPrr.3gu6qAq6.fno	8.43	7.97	8.26	8.44	8.24	8.01	8.24	8.14	8.49	7.63	8.53	8.4	8.18	8.17	8.22	8.43	8.43	8.22	8.27	8.22	8.19	8.21	8.31	8.37	8.32	8.19	8.51	8.49	8.14	8.13	8.45	8.17	8.42	8.35	8.45	8.14	8.57	8.02	8.25	8.09	8.39	8.25	8.03	8.93	8.83	8.28	8.09	8.09	8.27
0opygq4KD03OhIo.uU	7.19	7.24	7.21	7.21	7.21	7.17	7.22	7.16	7.27	7.18	7.2	7.32	7.19	7.17	7.2	7.17	7.16	7.24	7.22	7.23	7.2	7.2	7.23	7.18	7.21	7.18	7.18	7.22	7.15	7.18	7.18	7.22	7.17	7.15	7.15	7.18	7.23	7.17	7.17	7.19	7.17	7.18	7.18	7.17	7.18	7.23	7.21	7.17	7.18
0oPYIX6crrifoInqf4	11	10.77	11.33	11.03	10.67	10.45	11.7	10.13	10.74	10.5	10.42	10.65	10.61	10.15	10.67	11.01	10.63	10.69	10.29	10.14	11.63	10.27	10.42	10.11	10.72	11.39	10.79	11.39	10.95	11.2	10.97	12.48	11.22	10.35	13.12	10.94	10.63	11.01	11.54	10.27	10.25	10.6	10.97	11.42	10.79	11.29	10.48	11.37	11.25
0oQ56UeU97vSAhziF4	7.56	7.31	7.93	7.75	7.45	8.03	7.87	7.74	7.93	7.46	8.09	7.53	8.07	7.96	8.03	7.73	7.91	8.16	7.53	7.18	7.34	7.2	7.08	7.12	8.07	7.45	8.64	7.31	7.39	7.53	7.27	7.53	7.59	7.56	7.52	7.48	8.13	8.5	7.87	7.89	7.29	8.19	7.56	8.19	7.42	7.32	7.31	7.98	7.73
0oqa16BQk1GjHiq4T8	9.49	9.08	10.05	10.05	10.57	9.18	9.23	9.58	9.17	9.76	10.61	9.48	10.1	11.03	10.03	9.72	9.78	10	9.96	10.02	9.91	9.67	9.62	9.52	9.73	10.49	9.52	9.83	8.61	9.25	9.88	10.27	9.35	10.17	9.89	8.89	8.9	9.24	9.12	9.76	9.64	9.57	9.7	9.25	10.94	9.11	9.34	9.09	9.08
0oqI4KsIRFwkqiSEGo	7.52	7.45	7.49	7.56	7.44	7.51	7.44	7.49	7.49	7.59	7.39	7.4	7.46	7.46	7.41	7.5	7.59	7.56	7.6	7.65	7.61	7.64	7.53	7.91	7.3	7.49	7.39	7.55	7.34	7.51	7.44	7.51	7.53	7.5	7.45	7.59	7.49	7.38	7.52	7.57	7.49	7.43	7.46	7.55	7.51	7.43	7.68	7.55	7.34
0or34D1RLXoIFINcok	7.16	7.21	7.18	7.21	7.21	7.26	7.22	7.21	7.21	7.21	7.18	7.16	7.15	7.18	7.23	7.18	7.22	7.19	7.18	7.21	7.21	7.19	7.21	7.17	7.2	7.23	7.25	7.24	7.19	7.22	7.23	7.21	7.28	7.18	7.21	7.15	7.2	7.21	7.2	7.25	7.27	7.2	7.17	7.19	7.24	7.21	7.17	7.19	7.23
0or8fItPiLzOX2pReE	7.19	7.19	7.17	7.2	7.24	7.19	7.19	7.21	7.12	7.17	7.21	7.19	7.22	7.19	7.16	7.16	7.14	7.25	7.25	7.32	7.28	7.34	7.24	7.2	7.29	7.24	7.22	7.14	7.33	7.16	7.18	7.21	7.19	7.16	7.15	7.24	7.17	7.12	7.16	7.24	7.2	7.21	7.17	7.17	7.16	7.34	7.24	7.17	7.1
0oRJfSoteAiApQ0eeE	8.06	8.27	8.41	8.25	8.44	8.08	8.04	8.09	8.4	8.81	8.58	8.55	8.81	8.55	8.63	8.53	8.19	8.31	8.55	8.27	8.57	8.13	8.31	8.5	7.68	8.47	8.28	8.08	7.99	8.11	8.26	8.68	8.64	8.21	8.42	8.52	8.46	8.88	8.27	8.37	8.6	8.25	9.09	8.48	8.48	8.31	8.39	8.21	8.2
0orp7XQDefdo3V0t5U	7.37	7.43	7.45	7.55	7.52	7.33	7.32	7.28	7.42	7.39	7.43	7.44	7.25	7.37	7.28	7.39	7.42	7.43	7.45	7.58	7.54	7.61	7.59	7.37	7.54	7.32	7.45	7.36	7.39	8.02	7.51	7.33	7.33	7.4	7.41	7.51	7.39	7.42	7.36	7.47	7.27	7.42	7.46	7.35	7.39	7.59	7.63	7.38	7.3
0orqbwfQM66BKutf5o	7.3	7.3	7.31	7.34	7.28	7.3	7.32	7.33	7.27	7.28	7.26	7.32	7.25	7.28	7.25	7.26	7.25	7.25	7.43	7.55	7.37	7.64	7.63	7.67	7.41	7.33	7.29	7.32	7.31	7.25	7.29	7.37	7.32	7.27	7.23	7.48	7.27	7.34	7.33	7.26	7.27	7.29	7.26	7.33	7.25	7.38	7.35	7.26	7.25
0oRYfqKErXg7X91LsE	12.04	12.1	11.6	12.56	11.86	11.86	12.22	11.55	12.71	11.56	11.82	11.88	12.48	11.3	11.7	12.43	11.9	12.58	11.74	11.71	11.99	12.84	11.59	12.6	12.63	11.76	11.88	11.38	11.88	11.96	11.94	10.45	12.29	11.44	11.6	12.2	11.83	11.89	12	11.98	11.77	11.9	11.03	12.4	11.82	11.65	11.79	12.1	12.32
0OSiktMuA55Ue4yXuo	7.22	7.23	7.32	7.31	7.2	7.22	7.25	7.31	7.26	7.24	7.19	7.19	7.24	7.23	7.25	7.25	7.24	7.18	7.2	7.21	7.24	7.4	7.21	7.2	7.26	7.28	7.23	7.2	7.23	7.23	7.21	7.19	7.16	7.24	7.15	7.22	7.32	7.24	7.23	7.27	7.27	7.25	7.32	7.29	7.23	7.16	7.2	7.3	7.25
0OsqQpV0JKKSQSh6Dg	7.33	7.29	7.36	7.27	7.52	7.21	7.22	7.26	7.28	7.49	7.43	7.21	7.22	7.56	7.29	7.3	7.28	7.35	7.24	7.25	7.54	7.62	7.24	7.75	7.32	7.46	7.3	7.34	7.44	7.35	7.27	7.51	7.45	7.29	7.28	7.33	7.33	7.5	7.32	7.38	7.26	7.43	7.32	7.24	7.33	7.22	7.28	7.25	7.46
0OsS7kn_QOLev.hfAE	7.15	7.12	7.11	7.13	7.13	7.15	7.2	7.1	7.1	7.07	7.16	7.11	7.15	7.21	7.22	7.08	7.12	7.09	7.15	7.17	7.19	7.18	7.19	7.18	7.18	7.2	7.15	7.19	7.15	7.16	7.15	7.19	7.2	7.16	7.14	7.14	7.18	7.18	7.19	7.17	7.2	7.11	7.13	7	7.2	7.19	7.13	7.16	7.18
0oSSPUShGCnlXsK.Q4	11.94	11.54	12.45	10.06	9.99	12.13	12.41	11.54	9.65	8.56	11.81	11.77	12.81	11.54	12.45	11.57	12.87	9.46	11.02	12.33	10.09	12.06	10.89	11.33	12.17	9.47	11.62	11.04	10.99	11.49	11.83	12.53	10.92	11.61	11.24	11.73	11.57	10.97	11.74	12.36	11.48	12.73	11.51	12.5	9.58	11.51	11	11.49	11.52
0OtCHj6TXHD_FfLjiE	7.13	7.26	7.18	7.17	7.15	7.28	7.22	7.1	7.24	7.12	7.19	7.18	7.18	7.13	7.43	7.24	7.11	7.06	7.2	7.2	7.2	7.21	7.17	7.18	7.19	7.14	7.11	7.19	7.18	7.24	7.14	7.14	7.13	7.25	7.17	7.15	7.13	7.22	7.08	7.18	7.18	7.23	7.37	7.13	7.46	7.15	7.18	7.14	7.17
0oU3_H9OU0Iv54epUk	7.19	7.16	7.23	7.2	7.19	7.18	7.21	7.3	7.18	7.17	7.2	7.14	7.18	7.26	7.21	7.12	7.18	7.22	7.19	7.19	7.21	7.21	7.19	7.23	7.36	7.13	7.16	7.24	7.22	7.21	7.2	7.17	7.23	7.26	7.2	7.36	7.27	7.3	7.26	7.22	7.23	7.16	7.26	7.25	7.21	7.21	7.21	7.2	7.28
0OUliZ2oN6p1KYVYmk	7.22	7.18	7.19	7.16	7.2	7.2	7.27	7.26	7.2	7.2	7.15	7.24	7.23	7.16	7.24	7.15	7.2	7.18	7.26	7.18	7.21	7.2	7.15	7.18	7.2	7.19	7.22	7.23	7.3	7.25	7.24	7.18	7.19	7.19	7.15	7.16	7.18	7.14	7.17	7.23	7.21	7.16	7.24	7.17	7.17	7.15	7.24	7.22	7.19
0OVFqjnn.jXl4QX6v0	7.3	7.24	7.28	7.23	7.24	7.26	7.43	7.31	7.28	7.22	7.25	7.19	7.28	7.23	7.33	7.24	7.26	7.24	7.21	7.19	7.19	7.19	7.24	7.15	7.18	7.28	7.3	7.21	7.21	7.23	7.24	7.3	7.26	7.19	7.38	7.17	7.32	7.29	7.28	7.22	7.22	7.25	7.29	7.26	7.29	7.26	7.21	7.24	7.28
0oVG_716RXJ4VH_wXo	7.18	7.14	7.14	7.2	7.12	7.19	7.18	7.14	7.13	7.29	7.17	7.15	7.22	7.19	7.13	7.22	7.24	7.17	7.2	7.19	7.2	7.18	7.17	7.18	7.32	7.14	7.15	7.18	7.2	7.18	7.18	7.16	7.17	7.15	7.16	7.2	7.21	7.16	7.17	7.16	7.13	7.23	7.15	7.22	7.18	7.2	7.23	7.17	7.17
0oWoXonjkg.QcXiRRQ	7.07	7.11	7.12	7.11	7.09	7.14	7.12	7.11	7.1	7.13	7.11	7.16	7.11	7.19	7.15	7.13	7.16	7.11	7.2	7.17	7.18	7.14	7.18	7.12	7.14	7.14	7.14	7.12	7.16	7.09	7.14	7.13	7.11	7.14	7.22	7.16	7.18	7.16	7.15	7.17	7.07	7.17	7.17	7.12	7.14	7.17	7.17	7.11	7.11
0oX3WsAaq8EHUB.1UU	7.36	7.35	7.36	7.47	7.37	7.28	7.39	7.31	7.33	7.35	7.32	7.33	7.28	7.31	7.38	7.28	7.3	7.31	7.25	7.34	7.31	7.36	7.41	7.27	7.49	7.36	7.37	7.33	7.31	7.34	7.31	7.39	7.4	7.34	7.38	7.32	7.3	7.36	7.35	7.36	7.39	7.3	7.24	7.42	7.28	7.43	7.3	7.32	7.34
0oX6E._J9KCl6KOyqU	7.47	7.42	7.48	7.42	7.53	7.5	7.36	7.45	7.46	7.43	7.39	7.46	7.45	7.41	7.45	7.47	7.41	7.4	7.42	7.41	7.43	7.58	7.45	7.47	7.27	7.4	7.47	7.46	7.52	7.43	7.42	7.44	7.4	7.48	7.43	7.4	7.46	7.42	7.35	7.5	7.45	7.44	7.33	7.44	7.41	7.37	7.49	7.47	7.36
0oz9R9IJceqCniq1Sc	7.23	7.24	7.3	7.25	7.26	7.25	7.27	7.25	7.23	7.19	7.24	7.29	7.28	7.18	7.3	7.25	7.28	7.21	7.37	7.2	7.24	7.21	7.2	7.28	7.23	7.3	7.28	7.36	7.26	7.29	7.32	7.41	7.29	7.27	7.35	7.18	7.25	7.24	7.36	7.32	7.24	7.26	7.23	7.24	7.29	7.26	7.24	7.31	7.32
0Ozh_v_Tr._R.MwMA8	7.02	7.08	7.13	7.15	7.09	7.1	7.03	7.08	7.05	7.07	7.11	7.09	7.01	7.07	7.14	7.06	7.07	7.1	7.13	7.18	7.17	7.18	7.11	7.16	7.17	7.12	7.07	7.1	7.19	7.06	7.09	7.09	7.08	7.12	7.09	7.13	7.13	7.03	7.14	7.03	7.09	7.08	7.08	7.1	7.12	7.11	7.14	7.11	7.07
0OzlNhdOeC6hBbUjoA	7.17	7.18	7.16	7.2	7.2	7.23	7.25	7.23	7.23	7.17	7.23	7.17	7.21	7.2	7.24	7.21	7.15	7.19	7.19	7.19	7.23	7.21	7.22	7.18	7.24	7.29	7.25	7.27	7.22	7.28	7.23	7.23	7.27	7.29	7.19	7.18	7.22	7.29	7.22	7.23	7.23	7.25	7.24	7.23	7.21	7.26	7.21	7.3	7.22
0P.u_oqpDZNC.rgHek	7.43	7.42	7.44	7.41	7.44	7.57	7.51	7.43	7.38	7.44	7.52	7.43	7.42	7.4	7.45	7.37	7.41	7.47	7.81	7.83	7.68	7.69	7.8	7.91	7.86	7.53	7.37	7.73	7.51	7.59	7.54	7.61	7.55	7.56	7.39	7.64	7.39	7.42	7.46	7.53	7.58	7.39	7.37	7.49	7.37	7.51	7.69	7.59	7.33
0p0u6ELeIXAJ1KiJS0	7.19	7.16	7.15	7.13	7.15	7.18	7.2	7.25	7.13	7.11	7.2	7.23	7.2	7.21	7.15	7.2	7.11	7.13	7.26	7.18	7.19	7.26	7.16	7.17	7.17	7.17	7.16	7.15	7.14	7.17	7.24	7.16	7.2	7.19	7.21	7.13	7.13	7.16	7.19	7.24	7.26	7.23	7.15	7.21	7.16	7.14	7.21	7.26	7.15
0P0uquogrqYp4_nqEA	7.31	7.29	7.3	7.28	7.29	7.32	7.19	7.29	7.21	7.29	7.28	7.24	7.28	7.22	7.24	7.31	7.23	7.26	7.49	7.47	7.25	7.45	7.44	7.56	7.43	7.31	7.25	7.3	7.25	7.33	7.26	7.3	7.29	7.35	7.3	7.46	7.27	7.31	7.25	7.4	7.37	7.24	7.27	7.26	7.31	7.45	7.42	7.33	7.23
0P1E.qpz3CuHOUlBeo	7.9	7.88	8.18	7.93	7.89	7.78	7.71	7.59	7.88	8.22	7.71	7.89	7.96	7.63	7.6	7.54	8.04	8.4	7.83	7.35	7.92	8.8	7.74	7.68	8	7.48	7.85	7.62	7.95	7.75	7.65	7.54	7.99	7.81	7.69	7.78	7.98	7.64	8.04	7.7	7.87	7.56	8.29	8.44	8.03	8.23	8.06	7.56	8.44
0p1JjXXl0l34svqLIg	7.22	7.23	7.32	7.23	7.13	7.17	7.17	7.18	7.3	7.32	7.37	7.24	7.15	7.16	7.18	7.24	7.32	7.22	7.29	7.34	7.24	7.27	7.23	7.2	7.26	7.2	7.28	7.15	7.27	7.18	7.21	7.15	7.14	7.18	7.19	7.27	7.21	7.13	7.19	7.19	7.15	7.15	7.23	7.14	7.2	7.25	7.22	7.15	7.07
0p1JNHXeUX6ruqejwA	9.28	9.26	8.83	9.6	8.49	10.59	10.18	9.59	9.79	8.44	9.62	9.74	10.45	9.72	8.96	9.7	10.13	10.54	10.04	9.69	10.08	9.66	9.05	9.25	9.06	10.13	8.98	10.14	9.82	9.25	9.33	9.94	9.71	9.8	8.69	9.69	8.72	8.82	10.39	9.87	9.88	8.36	8.88	9.55	10.12	9.07	10.26	10.53	8.95
0p1xdgQ3a_6pC4idSE	7.42	7.32	7.33	7.36	7.37	7.4	7.32	7.37	7.35	7.36	7.35	7.34	7.29	7.28	7.34	7.29	7.3	7.28	7.4	7.49	7.46	7.6	7.59	7.18	7.55	7.49	7.33	7.46	7.29	7.47	7.48	7.52	7.43	7.43	7.38	7.4	7.32	7.43	7.42	7.42	7.51	7.34	7.3	7.31	7.34	7.31	7.41	7.46	7.37
0P4XS5XhxB6A5QAdi0	9.05	8.81	8.76	8.89	8.68	8.33	7.88	9.02	8.42	10.39	9.63	9.66	8.01	9.76	8.36	9.2	8.7	8.26	7.81	7.89	7.82	7.88	7.76	8.07	7.71	7.8	8.34	7.97	7.87	8.54	7.59	7.71	7.66	8.03	8.47	7.61	8.83	7.8	7.61	7.57	7.99	8.82	9.27	8.96	9.18	7.58	7.6	7.65	8.28
0p56h222vph1aG8rL8	7.76	8.36	8.22	7.77	8.36	8.1	7.77	8.1	8.26	8.03	8.07	8.33	8.05	8.23	8.14	7.65	8.03	7.66	9.14	8.6	8.2	7.38	8.72	8.32	8.06	8.74	8.07	8.6	7.87	8.09	8.38	8.53	8.21	7.93	8.23	8.37	8.31	7.93	8.05	8.46	8.47	8.3	8.36	8.21	8.15	8.44	8.3	8.13	8.37
0p5S1boUg6oduuXveo	7.3	7.24	7.29	7.23	7.32	7.31	7.4	7.33	7.29	7.32	7.25	7.27	7.35	7.28	7.31	7.35	7.28	7.23	7.21	7.19	7.22	7.14	7.18	7.14	7.17	7.31	7.29	7.24	7.18	7.26	7.37	7.28	7.29	7.25	7.3	7.12	7.28	7.3	7.34	7.21	7.27	7.22	7.25	7.25	7.27	7.16	7.15	7.31	7.38
0p5VKdeC1J_j5eTgBM	7.22	7.21	7.17	7.14	7.3	7.25	7.2	7.16	7.26	7.42	7.21	7.26	7.18	7.29	7.18	7.24	7.23	7.17	7.15	7.18	7.16	7.15	7.14	7.14	7.18	7.19	7.16	7.13	7.18	7.14	7.16	7.19	7.13	7.17	7.24	7.13	7.21	7.16	7.23	7.19	7.16	7.17	7.17	7.12	7.15	7.21	7.18	7.19	7.2
0p6aNQkDpQ4jT7gpKo	8.04	9.73	7.98	7.94	8.12	8.26	8.1	8.08	8.04	7.98	8.21	7.98	8.2	8.19	7.79	8.59	8.01	7.83	8.41	8.36	8.03	8.46	8.34	8.39	8.35	8.38	8.08	8.39	8.21	8.08	8.53	8.12	8.34	8.24	7.95	8.23	9.14	7.99	8.2	8.16	8.14	8.22	7.94	8.8	8.27	8.22	8.22	8.76	8.02
0p6gC8eyWG.6aZBe4Y	7.1	7.09	7.1	7.12	7.08	7.11	7.05	7.07	7.13	7.09	7.16	7.09	7.15	7.17	7.08	7.05	7.11	7.15	7.18	7.18	7.18	7.19	7.17	7.18	7.17	7.16	7.12	7.11	7.15	7.1	7.12	7.2	7.2	7.1	7.11	7.11	7.09	7.16	7.21	7.14	7.14	7.13	7.08	7.08	7.21	7.13	7.19	7.12	7.09
0p6J6iK54nBLlBC518	10.28	10.21	9.63	9.24	9.33	9.3	10.58	8.7	9.28	9.17	9.25	9.96	9.76	10.91	9.61	10.25	9.6	8.33	9.56	9.3	9.66	9.52	10.37	9.88	9.3	10.07	9.37	9.82	9.25	9.93	9.86	9.23	8.86	9.22	9.55	9.49	9.5	9.38	9.04	9.25	9.28	9.35	9.79	8.78	9.5	9.74	9.71	9.67	9
0p77i30kV1TsXzNXd4	10.32	10.74	9.95	10.39	10.61	10.62	11.26	10.97	10.91	9.72	10.83	10.61	9.98	10.4	10.38	10.44	10.87	10.13	11.42	11.03	11.15	10.63	11.19	11.04	11.06	10.85	11.09	11.25	12.05	10.64	10.83	10.95	11.02	10.75	11.12	11.47	10.89	10.51	11.34	10.68	11.15	11.06	9.8	11.52	13.37	11.58	11.23	11.02	11.19
0p798lJUsS5eW6.0dI	7.12	7.11	7.15	7.15	7.18	7.1	7.14	7.14	7.18	7.17	7.19	7.26	7.13	7.1	7.17	7.09	7.11	7.14	7.23	7.2	7.21	7.2	7.18	7.19	7.21	7.08	7.12	7.17	7.18	7.15	7.14	7.11	7.09	7.18	7.13	7.17	7.03	7.17	7.12	7.05	7.17	7.08	7.13	7.11	7.22	7.12	7.14	7.13	7.16
0p8EiBCf8SG18KQS5I	8.07	8.46	8.31	8.78	8.39	8.45	7.9	8.14	8.43	9.69	8.55	8.46	7.85	8.71	8.83	8.6	8.53	7.89	7.25	7.52	7.28	7.22	7.21	7.21	7.23	7.31	8.55	7.45	7.22	7.36	7.31	7.44	7.36	7.36	8.14	7.32	8.76	7.6	7.4	7.34	7.41	8.54	9.69	9.18	9.2	7.29	7.23	7.31	7.85
0p9dXIr0ApEPIK2.oI	7.64	8.34	8.71	7.6	7.88	7.41	7.4	7.46	8.11	9.47	8.02	7.76	7.39	8.45	7.9	8.37	7.7	7.38	7.21	7.17	7.44	7.13	7.19	7.12	7.15	7.93	7.83	7.66	7.2	7.81	7.4	8.17	7.52	7.64	8.08	7.2	7.5	7.71	7.44	7.44	7.69	7.87	8.59	7.87	8.31	7.68	7.21	7.5	7.8
0p_CDOAMFJRI_70XPg	7.21	7.19	7.22	7.3	7.2	7.22	7.19	7.27	7.25	7.24	7.21	7.22	7.31	7.19	7.22	7.24	7.25	7.16	7.24	7.18	7.24	7.25	7.19	7.18	7.21	7.2	7.2	7.16	7.25	7.19	7.19	7.2	7.16	7.17	7.27	7.22	7.2	7.12	7.14	7.15	7.25	7.23	7.21	7.27	7.34	7.26	7.2	7.21	7.2
0pA6qf7urAPdTr_oUk	7.3	7.33	7.27	7.27	7.21	7.28	7.26	7.24	7.21	7.35	7.3	7.22	7.27	7.23	7.24	7.3	7.22	7.31	7.4	7.28	7.32	7.32	7.29	7.42	7.35	7.35	7.17	7.32	7.31	7.28	7.25	7.34	7.29	7.29	7.27	7.35	7.29	7.21	7.33	7.24	7.23	7.3	7.33	7.2	7.28	7.29	7.31	7.33	7.25
0pAdZTd3UyoL959d6U	7.37	7.42	7.34	7.41	7.47	7.19	7.3	7.27	7.22	7.34	7.53	7.46	7.28	7.24	7.33	7.18	7.64	7.52	7.22	7.18	7.46	7.17	7.75	8.55	7.35	7.29	7.26	7.14	7.19	7.7	7.22	7.31	7.16	7.23	7.3	7.46	7.66	7.31	7.42	7.43	7.66	7.28	7.34	7.19	7.21	7.3	7.48	7.21	7.34
0pBqCG1CXwE0u5bOtQ	8.44	9.33	8.44	8.81	8.44	7.92	8.28	9.13	8.2	8.28	9.18	8.82	8.3	9.06	8.02	8.94	9.07	8.27	8.66	8.31	8.36	8.72	9.48	8.69	9.5	8.84	8.76	8.92	9	8.27	8.87	9.38	9.58	8.94	8.38	9.57	9.52	8.3	9.14	8.76	8.48	9.01	8.23	10.44	8.19	9.16	8.79	9.61	9.43
0pCCcfrTyIqIRSd.r4	7.3	7.33	7.25	7.33	7.46	7.38	7.47	7.29	7.38	7.59	7.54	7.33	7.32	7.45	7.43	7.29	7.43	7.26	7.45	7.54	7.47	7.41	7.66	7.6	7.59	7.46	7.34	7.37	7.27	7.28	7.39	7.45	7.32	7.38	7.32	7.43	7.35	7.38	7.35	7.36	7.39	7.39	7.37	7.4	7.37	7.62	7.47	7.38	7.54
[truncated: 27,492 more rows]
[truncated: 4 more columns]
